# Supplementary material for: Self-reported symptoms and health complaints associated with exposure to Ixodes ricinus-borne pathogens
Source: Parasit Vectors. 2022 Mar 18;15:93. doi: 10.1186/s13071-022-05228-4 (PMC8931963; doi:10.1186/s13071-022-05228-4)
Supplement: Supplementary file 1 — Additional file 1. Data and statistical analyses. [file 13071_2022_5228_MOESM1_ESM.xlsx]

## Sheet: TBPs_in_ticks
TBP	A. phagocytophilum	Babesia ungulate	B. microti	R. helvetica	Spiroplasma	N. mikurensis	B. miyamotoi	Borrelia sl	No pathogen	Total
Positive ticks	129	68	36	874	838	254	173	898	1767	4163 (695 co-infections)
Prevalence	3.09427	1.63109	0.863516	20.9643	20.1487	6.09259	4.14968	21.5639	42.4802

## Sheet: Molecular_test_results
Particiupant ID	Tick life stage	path_anaplasma	path_b_ungulate	path_b_microti	path_r_helvetica	path_spiroplasma	path_neoehrlichia	path_b_miyamotoi	path_bsl
193TR1803	N	negative	negative	negative	negative	negative	negative	negative	positive
283TR1619	A	negative	negative	negative	negative	negative	negative	negative	negative
306TR1313	N	negative	negative	negative	negative	negative	positive	negative	positive
420TR0654a	N	negative	negative	negative	negative	negative	positive	negative	positive
613TR758	N	negative	negative	negative	negative	negative	negative	negative	positive
703TR6062b	N	negative	negative	negative	negative	positive	negative	negative	negative
719TR568	N	negative	negative	negative	positive	negative	positive	negative	positive
729TR630	N	negative	negative	negative	negative	negative	negative	negative	positive
759TR1056	A	positive	negative	negative	negative	positive	negative	negative	negative
994TR7553	N	negative	negative	negative	negative	negative	positive	positive	positive
1104TR1112	N	negative	negative	negative	negative	positive	negative	negative	negative
1111TR2096	N	negative	negative	negative	positive	negative	negative	negative	negative
1196TR4050a	N	negative	negative	negative	negative	negative	negative	negative	negative
1247TR1473	N	negative	negative	negative	negative	negative	negative	negative	negative
1281TR464	N	negative	negative	negative	negative	negative	negative	negative	negative
1469TR873	A	negative	negative	negative	positive	positive	negative	negative	positive
1632TR443	N	negative	negative	negative	positive	negative	positive	negative	positive
1642TR450	N	negative	negative	negative	negative	negative	negative	negative	negative
1644TR451	A	negative	positive	negative	negative	positive	negative	negative	negative
1645TR452	N	negative	negative	negative	negative	negative	negative	negative	negative
1646TR454	N	negative	negative	negative	negative	negative	negative	negative	negative
1650TR456	N	negative	negative	negative	negative	negative	negative	negative	negative
1651TR459	N	negative	negative	negative	positive	negative	negative	negative	negative
1656TR462	N	negative	negative	negative	negative	negative	negative	negative	negative
1658TR463	N	negative	negative	negative	negative	negative	negative	negative	positive
1673TR469	N	negative	negative	negative	negative	negative	negative	negative	negative
1675TR472	A	negative	negative	negative	negative	negative	negative	negative	positive
1678TR524	N	negative	negative	negative	negative	negative	negative	negative	negative
1680TR475	N	negative	negative	negative	negative	negative	negative	negative	negative
1681TR476	A	negative	negative	negative	negative	positive	negative	negative	negative
1687TR479	N	negative	negative	negative	negative	negative	negative	negative	negative
1690TR483	N	negative	negative	negative	negative	negative	negative	negative	negative
1693TR482	N	negative	negative	negative	negative	negative	negative	negative	negative
1706TR491	N	negative	negative	negative	positive	negative	negative	negative	positive
1713TR495	N	negative	negative	negative	negative	positive	negative	negative	negative
1718TR498	N	negative	negative	negative	negative	negative	negative	negative	negative
1729TR505	A	negative	negative	negative	negative	negative	negative	negative	negative
1731TR543	A	negative	negative	negative	negative	negative	negative	negative	negative
1736TR512	N	negative	negative	negative	negative	negative	negative	negative	negative
1740TR515	N	negative	negative	negative	negative	negative	negative	negative	negative
1742TR1820	N	negative	negative	negative	negative	negative	negative	negative	negative
1791TR547	N	negative	negative	negative	negative	negative	negative	negative	positive
1795TR551	N	negative	negative	negative	negative	positive	negative	negative	negative
1797TR553	A	negative	negative	negative	negative	negative	negative	negative	negative
1802TR555	A	negative	negative	negative	negative	negative	negative	negative	negative
1810TR558	N	negative	negative	negative	negative	negative	negative	negative	negative
1817TR564	N	negative	negative	negative	negative	negative	negative	negative	positive
1818TR565	N	negative	negative	negative	negative	negative	positive	negative	negative
1821TR570	A	negative	negative	negative	negative	negative	negative	negative	negative
1824TR574	N	negative	negative	negative	positive	negative	negative	negative	negative
1827TR1435	N	negative	negative	negative	negative	positive	negative	negative	negative
1828TR577	N	negative	negative	negative	negative	negative	negative	negative	positive
1830TR579	A	negative	negative	negative	negative	negative	negative	positive	negative
1832TR580	A	negative	negative	negative	negative	negative	negative	negative	negative
1836TR581	N	negative	negative	negative	negative	negative	negative	negative	negative
1837TR584	A	negative	negative	negative	negative	negative	negative	negative	negative
1848TR598	N	negative	negative	negative	negative	negative	negative	negative	negative
1850TR600	N	negative	negative	negative	negative	negative	negative	negative	negative
1851TR601	N	negative	negative	negative	negative	negative	negative	negative	positive
1857TR607	N	negative	negative	negative	negative	positive	negative	negative	positive
1869TR4609a	N	negative	negative	negative	negative	positive	negative	negative	positive
1878TR627	N	negative	negative	negative	positive	negative	negative	negative	negative
1881TR631	N	negative	negative	negative	negative	positive	positive	negative	negative
1884TR634	N	negative	negative	negative	negative	negative	negative	negative	negative
1886TR636	N	negative	negative	negative	positive	negative	negative	negative	negative
1890TR638	N	negative	negative	negative	negative	positive	negative	positive	negative
1892TR641	N	negative	negative	negative	negative	negative	negative	negative	negative
1894TR643	N	negative	negative	negative	negative	negative	negative	negative	negative
1899TR646	N	negative	negative	negative	negative	negative	negative	negative	positive
1905TR651	N	negative	negative	negative	negative	negative	negative	negative	negative
1918TR665	A	negative	negative	negative	negative	negative	negative	negative	negative
1926TR674	A	negative	negative	negative	positive	negative	negative	negative	positive
1927TR675	N	negative	negative	negative	positive	negative	negative	negative	negative
1935TR685	N	negative	negative	negative	negative	negative	negative	negative	negative
1938TR2489	N	negative	negative	negative	negative	positive	negative	negative	negative
1942TR688	N	negative	negative	negative	negative	negative	negative	negative	negative
1948TR693	N	negative	negative	negative	negative	negative	negative	negative	negative
1967TR1309	N	negative	negative	negative	negative	negative	negative	negative	negative
1969TR0060a	N	negative	negative	negative	negative	negative	negative	negative	negative
1988TR737	N	negative	negative	negative	negative	negative	negative	negative	positive
2007TR753	N	negative	negative	negative	negative	positive	negative	negative	positive
2011TR755	N	negative	negative	negative	negative	negative	negative	negative	negative
2013TR757	N	negative	negative	negative	negative	negative	negative	negative	negative
2014TR759	N	negative	negative	negative	negative	negative	negative	negative	negative
2015TR762	N	negative	negative	negative	negative	negative	positive	negative	negative
2017TR763	N	negative	negative	negative	negative	negative	negative	negative	negative
2023TR769	N	negative	negative	negative	negative	negative	negative	negative	positive
2024TR770	N	negative	negative	negative	negative	positive	negative	negative	negative
2025TR774	A	negative	negative	negative	negative	negative	negative	negative	negative
2027TR775	N	negative	negative	negative	negative	negative	negative	negative	negative
2048TR794	N	negative	negative	negative	negative	negative	negative	negative	negative
2050TR7881	N	negative	negative	negative	negative	positive	negative	negative	negative
2052TR799	N	negative	negative	negative	negative	negative	negative	negative	positive
2057TR805	N	negative	negative	negative	positive	negative	negative	negative	negative
2059TR806	N	negative	negative	negative	negative	negative	positive	negative	positive
2060TR808	A	negative	negative	negative	negative	negative	negative	negative	negative
2066TR818	N	negative	negative	negative	positive	negative	positive	negative	negative
2079TR825	N	negative	negative	negative	negative	negative	negative	negative	negative
2080TR826	N	negative	negative	negative	negative	negative	negative	negative	negative
2081TR828	N	negative	negative	negative	negative	positive	negative	negative	negative
2082TR829	N	negative	negative	negative	negative	negative	negative	positive	positive
2084TR830	N	negative	negative	negative	positive	negative	negative	negative	positive
2086TR836	N	negative	negative	negative	negative	positive	negative	negative	negative
2090TR838	N	negative	negative	negative	negative	positive	negative	negative	positive
2099TR843	A	negative	negative	negative	positive	negative	negative	negative	positive
2106TR848	N	negative	negative	negative	negative	negative	negative	positive	negative
2109TR851	N	negative	negative	negative	negative	negative	negative	negative	negative
2112TR855	A	negative	negative	negative	positive	negative	negative	negative	positive
2113TR2122	N	negative	negative	negative	negative	negative	negative	negative	negative
2116TR860	N	negative	negative	negative	negative	negative	negative	negative	negative
2117TR862	N	negative	negative	negative	negative	negative	negative	positive	positive
2123TR871	A	negative	negative	negative	negative	positive	negative	negative	positive
2126TR973	N	negative	negative	negative	negative	negative	negative	negative	negative
2128TR878	N	negative	negative	negative	positive	negative	negative	negative	negative
2130TR882	N	negative	negative	negative	negative	negative	negative	negative	negative
2133TR1198	N	negative	negative	negative	positive	negative	negative	negative	negative
2134TR887	N	negative	negative	negative	negative	negative	negative	negative	positive
2136TR890	N	negative	negative	negative	negative	negative	negative	negative	negative
2137TR2069	A	negative	negative	negative	negative	positive	negative	negative	positive
2142TR896	N	negative	negative	negative	positive	negative	negative	negative	negative
2144TR900	A	negative	negative	negative	negative	positive	negative	negative	negative
2148TR2855	N	negative	negative	negative	negative	negative	negative	negative	negative
2155TR908	A	negative	negative	negative	negative	negative	negative	negative	negative
2158TR911	N	negative	negative	negative	negative	positive	negative	negative	negative
2164TR916	N	negative	negative	negative	positive	positive	negative	negative	negative
2168TR922	A	negative	negative	negative	negative	negative	negative	negative	negative
2169TR923	N	negative	negative	negative	negative	negative	positive	negative	positive
2177TR930	A	negative	negative	negative	negative	negative	negative	negative	positive
2179TR935	A	negative	negative	negative	negative	negative	negative	negative	negative
2183TR6962	N	negative	negative	negative	positive	negative	negative	positive	negative
2184TR1202	N	positive	positive	negative	positive	negative	negative	negative	negative
2189TR945	N	negative	negative	negative	negative	positive	negative	negative	negative
2194TR947	N	negative	negative	negative	negative	positive	negative	negative	negative
2196TR948	N	negative	negative	negative	positive	negative	positive	positive	negative
2197TR951	N	negative	negative	negative	positive	negative	negative	negative	negative
2205TR1353	A	negative	positive	negative	negative	negative	negative	negative	negative
2213TR965	N	negative	negative	negative	negative	negative	negative	negative	positive
2215TR969	N	negative	negative	negative	negative	negative	negative	negative	negative
2217TR970	N	negative	negative	negative	negative	negative	negative	negative	negative
2219TR971	A	negative	negative	negative	negative	negative	positive	negative	positive
2220TR974	N	negative	negative	negative	negative	negative	negative	negative	negative
2228TR1397	N	negative	negative	negative	negative	negative	negative	negative	negative
2230TR984	A	negative	negative	negative	positive	negative	negative	negative	negative
2232TR986	N	negative	negative	negative	negative	negative	negative	negative	negative
2239TR993	N	negative	negative	negative	negative	negative	negative	negative	negative
2253TR1009	A	negative	negative	negative	negative	negative	negative	negative	negative
2255TR1011	N	negative	negative	negative	positive	negative	negative	negative	negative
2266TR1026	N	negative	negative	negative	negative	negative	negative	negative	negative
2274TR1038	N	negative	negative	negative	negative	negative	negative	negative	negative
2281TR1042	N	negative	positive	negative	negative	negative	negative	negative	positive
2285TR1047	N	negative	negative	negative	negative	positive	negative	negative	negative
2286TR1048	N	negative	negative	negative	positive	negative	positive	negative	positive
2295TR1057	N	negative	negative	negative	positive	negative	negative	negative	positive
2299TR1064	N	negative	negative	negative	negative	negative	negative	negative	negative
2302TR1068	N	negative	negative	negative	negative	positive	negative	negative	negative
2303TR1070	N	negative	negative	negative	negative	negative	negative	negative	negative
2321TR1089	N	negative	negative	negative	negative	negative	negative	negative	negative
2323TR1090	N	negative	negative	negative	negative	negative	negative	negative	negative
2326TR1096	A	negative	negative	negative	negative	negative	positive	negative	positive
2327TR1097	N	negative	negative	negative	negative	negative	negative	negative	negative
2328TR1099	N	negative	negative	negative	negative	positive	negative	negative	negative
2331TR1105	N	negative	negative	negative	negative	negative	negative	negative	negative
2333TR1106	A	negative	negative	negative	negative	negative	negative	negative	negative
2336TR1111	A	negative	negative	negative	negative	negative	negative	negative	negative
2344TR1124	N	negative	negative	negative	negative	negative	negative	negative	negative
2349TR1128	A	negative	negative	negative	negative	negative	positive	negative	negative
2360TR1138	N	negative	negative	negative	negative	negative	negative	negative	negative
2371TR1148	N	negative	negative	negative	negative	positive	negative	negative	negative
2373TR1149	N	negative	negative	negative	positive	negative	negative	negative	positive
2378TR1152	A	negative	negative	negative	positive	negative	negative	negative	negative
2380TR1154	N	negative	negative	negative	positive	negative	negative	negative	positive
2383TR1157	N	negative	negative	negative	negative	negative	positive	negative	negative
2393TR1165	N	negative	negative	negative	negative	negative	negative	negative	positive
2400TR1172	N	negative	negative	negative	positive	negative	negative	negative	negative
2410TR1180	N	negative	negative	negative	negative	negative	negative	negative	negative
2412TR1184	N	negative	negative	negative	negative	negative	negative	negative	negative
2418TR1191	N	negative	negative	negative	negative	negative	negative	negative	negative
2421TR1193	N	negative	negative	negative	positive	negative	negative	negative	negative
2426TR1200	N	negative	negative	negative	negative	negative	negative	negative	negative
2435TR1211	N	negative	negative	negative	negative	negative	negative	negative	negative
2436TR1213	N	negative	negative	negative	negative	negative	negative	negative	negative
2438TR2373	N	positive	negative	negative	positive	negative	negative	negative	positive
2449TR2107b	N	negative	negative	negative	negative	negative	negative	negative	negative
2453TR1233	N	negative	negative	negative	negative	negative	negative	negative	negative
2458TR6720	N	negative	negative	negative	negative	negative	negative	positive	negative
2466TR1250	A	negative	negative	negative	negative	negative	negative	negative	negative
2468TR2038	N	negative	negative	negative	negative	positive	negative	negative	negative
2482TR1272	N	negative	negative	negative	negative	negative	negative	negative	positive
2483TR1273	N	negative	negative	negative	negative	negative	negative	negative	negative
2501TR1298	N	negative	negative	negative	negative	negative	negative	negative	negative
2508TR1314	N	negative	negative	negative	negative	negative	negative	negative	positive
2509TR1317	N	negative	negative	negative	negative	negative	negative	negative	negative
2511TR1319	N	negative	negative	negative	negative	positive	negative	negative	negative
2537TR1341	A	negative	negative	negative	positive	negative	negative	negative	negative
2542TR1344	N	negative	negative	negative	positive	negative	negative	negative	negative
2543TR1345	N	negative	negative	negative	positive	negative	negative	negative	positive
2546TR1347	N	negative	negative	negative	negative	negative	negative	negative	positive
2547TR1349	N	negative	negative	negative	positive	negative	negative	negative	negative
2549TR1348	N	negative	negative	negative	negative	positive	negative	negative	negative
2553TR4159	N	negative	negative	negative	negative	positive	negative	negative	positive
2555TR1357	A	negative	negative	negative	negative	positive	negative	negative	negative
2556TR1359	A	negative	negative	negative	negative	negative	negative	negative	negative
2571TR1372	A	negative	negative	negative	negative	negative	negative	negative	positive
2574TR1379	N	negative	negative	negative	negative	negative	negative	negative	positive
2588TR1398	N	negative	negative	negative	positive	negative	negative	negative	negative
2590TR1402	N	negative	negative	negative	negative	positive	negative	negative	negative
2594TR1406	N	negative	negative	negative	negative	positive	negative	negative	negative
2599TR1410	N	negative	negative	negative	negative	negative	negative	negative	negative
2600TR1411	N	negative	negative	negative	negative	negative	negative	negative	negative
2613TR1430	A	negative	negative	negative	positive	negative	negative	negative	negative
2614TR1431	A	negative	negative	negative	negative	negative	negative	negative	negative
2616TR1432	A	negative	negative	negative	negative	positive	negative	negative	negative
2617TR1433	A	negative	negative	negative	positive	negative	negative	negative	positive
2625TR1445	N	negative	negative	negative	negative	negative	negative	negative	negative
2629TR1451	N	negative	negative	negative	negative	positive	negative	negative	negative
2630TR1452	A	negative	negative	negative	positive	positive	negative	negative	negative
2635TR1459	A	negative	negative	negative	negative	negative	negative	negative	negative
2636TR1460	N	negative	negative	negative	negative	negative	negative	negative	negative
2640TR1853a	N	positive	negative	negative	positive	negative	negative	negative	negative
2642TR1465	N	negative	negative	negative	negative	negative	negative	negative	negative
2648TR1472	N	negative	negative	negative	negative	positive	negative	negative	negative
2652TR1476	N	negative	negative	negative	negative	negative	negative	negative	negative
2653TR1478	N	negative	negative	negative	positive	negative	negative	negative	negative
2655TR1484	N	negative	negative	negative	negative	negative	negative	negative	negative
2666TR1494	N	negative	negative	negative	negative	negative	negative	negative	negative
2670TR1496	N	positive	negative	negative	negative	negative	negative	negative	positive
2673TR1505	A	negative	negative	negative	negative	negative	negative	negative	negative
2681TR1516	N	negative	negative	negative	negative	negative	negative	negative	negative
2682TR1517	N	negative	negative	negative	negative	negative	negative	negative	negative
2683TR1518	N	negative	negative	negative	negative	negative	negative	negative	negative
2684TR1519	N	negative	negative	negative	negative	negative	negative	negative	negative
2688TR1523	A	negative	negative	negative	negative	negative	negative	negative	negative
2689TR1526	N	positive	negative	negative	negative	negative	negative	negative	positive
2694TR1531	N	negative	negative	negative	negative	negative	negative	negative	negative
2696TR1534	N	negative	negative	negative	positive	negative	negative	negative	negative
2698TR1535	A	negative	negative	negative	negative	negative	negative	positive	negative
2700TR1536	N	negative	negative	negative	negative	negative	negative	negative	negative
2701TR1538	N	negative	negative	negative	negative	negative	negative	negative	negative
2705TR1539	N	negative	negative	negative	negative	negative	negative	negative	negative
2706TR1542	A	negative	negative	negative	negative	negative	negative	negative	positive
2708TR1838	A	negative	negative	negative	negative	negative	negative	negative	negative
2709TR1546	N	negative	negative	negative	negative	negative	negative	negative	negative
2714TR1554	A	negative	negative	negative	negative	positive	negative	negative	positive
2718TR4096a	N	negative	negative	negative	negative	negative	negative	negative	negative
2719TR1586	A	negative	negative	negative	negative	negative	negative	negative	positive
2723TR5946b	N	negative	negative	negative	negative	negative	negative	negative	negative
2724TR1569	N	negative	negative	negative	negative	negative	negative	negative	negative
2726TR1573	N	negative	negative	negative	negative	positive	negative	negative	negative
2732TR1582	N	negative	negative	negative	negative	negative	negative	negative	negative
2738TR1589	N	positive	negative	negative	negative	negative	negative	negative	negative
2739TR1590	N	negative	negative	negative	positive	negative	negative	negative	negative
2744TR1593	N	negative	negative	negative	negative	negative	negative	negative	negative
2745TR1595	N	negative	positive	negative	negative	negative	negative	negative	negative
2750TR1602	A	negative	negative	negative	negative	negative	negative	negative	negative
2754TR1604	N	negative	negative	negative	negative	positive	negative	negative	negative
2755TR1607	A	negative	negative	negative	negative	negative	negative	positive	negative
2758TR1609	N	negative	negative	negative	negative	negative	positive	negative	negative
2763TR1612	N	negative	negative	negative	negative	negative	negative	positive	negative
2777TR1625	A	positive	negative	negative	negative	negative	negative	negative	negative
2782TR1627	N	negative	negative	negative	negative	positive	negative	negative	negative
2796TR1647	A	negative	negative	negative	positive	negative	positive	negative	positive
2805TR1652	N	negative	negative	negative	negative	negative	negative	negative	negative
2814TR1661	A	negative	negative	negative	negative	negative	negative	negative	negative
2815TR1662	A	negative	negative	negative	negative	negative	negative	negative	positive
2821TR1668	N	negative	negative	negative	negative	negative	negative	negative	positive
2823TR1670	A	negative	negative	negative	negative	negative	negative	negative	positive
2826TR1675	A	negative	negative	positive	positive	negative	negative	negative	positive
2831TR1682	N	negative	negative	negative	negative	negative	negative	negative	positive
2841TR1690	N	negative	negative	negative	positive	negative	negative	negative	positive
2845TR1695	N	negative	negative	negative	negative	negative	negative	negative	negative
2848TR1700	N	negative	negative	negative	negative	negative	negative	negative	positive
2853TR1709	N	negative	negative	negative	negative	negative	negative	negative	negative
2855TR1712	N	negative	negative	negative	negative	negative	negative	negative	negative
2856TR1853	N	negative	negative	negative	positive	negative	negative	negative	negative
2862TR7554	A	negative	negative	negative	negative	negative	negative	negative	positive
2864TR1720	N	negative	negative	negative	negative	negative	negative	negative	negative
2866TR1722	A	negative	negative	negative	negative	negative	negative	negative	positive
2867TR1723	A	negative	negative	negative	negative	negative	negative	negative	negative
2871TR1734	N	negative	negative	negative	negative	negative	negative	negative	negative
2872TR1736	N	negative	negative	negative	negative	negative	negative	negative	negative
2884TR1750	A	negative	negative	negative	negative	negative	negative	negative	negative
2885TR1753	N	negative	negative	negative	negative	negative	negative	negative	negative
2889TR1757	N	negative	negative	negative	negative	negative	negative	negative	positive
2903TR1773	N	negative	negative	negative	negative	positive	negative	negative	negative
2906TR1776	A	negative	negative	negative	negative	negative	negative	negative	negative
2907TR1777	A	positive	negative	negative	negative	negative	negative	negative	negative
2908TR1778	A	negative	negative	negative	negative	positive	negative	negative	negative
2914TR1784	N	negative	negative	negative	negative	negative	negative	negative	positive
2916TR1786	N	negative	negative	negative	negative	negative	negative	negative	negative
2917TR2966	N	negative	negative	negative	negative	negative	negative	negative	negative
2922TR1792	N	negative	negative	negative	negative	negative	negative	negative	negative
2929TR1797	N	negative	negative	negative	negative	negative	negative	negative	negative
2930TR1798	N	negative	negative	negative	negative	negative	positive	positive	negative
2934TR1800	N	negative	negative	negative	negative	positive	negative	negative	negative
2936TR1801	N	negative	negative	negative	negative	positive	negative	negative	negative
2939TR1804	A	negative	negative	negative	negative	negative	negative	negative	negative
2944TR1808	N	negative	negative	negative	negative	negative	negative	negative	positive
2945TR1809	A	negative	negative	negative	negative	negative	negative	positive	positive
2946TR1811	N	negative	negative	negative	negative	negative	negative	negative	negative
2947TR1812	N	negative	negative	negative	positive	negative	negative	negative	negative
2955TR1819	A	negative	negative	negative	negative	positive	negative	negative	negative
2959TR1826	A	negative	negative	negative	negative	negative	negative	negative	negative
2962TR1832	N	negative	negative	negative	positive	negative	negative	negative	negative
2966TR1834	A	negative	negative	negative	positive	positive	negative	negative	negative
2969TR1843	N	negative	negative	negative	negative	negative	negative	negative	negative
2974TR1854	N	negative	negative	negative	positive	negative	negative	negative	negative
2982TR1857	N	negative	negative	negative	negative	negative	negative	negative	negative
2983TR1858	N	negative	negative	negative	negative	negative	negative	negative	positive
2985TR1859	A	negative	negative	negative	positive	negative	negative	negative	negative
2986TR1860	N	negative	negative	negative	negative	negative	negative	negative	negative
2987TR1863	A	positive	negative	negative	negative	negative	negative	negative	negative
2988TR1865	N	negative	negative	negative	negative	negative	negative	negative	negative
2999TR1878	N	negative	negative	negative	negative	negative	negative	negative	negative
3000TR1883	A	positive	negative	negative	positive	negative	negative	negative	negative
3003TR1887	N	negative	negative	negative	negative	negative	negative	negative	negative
3005TR1890	N	negative	negative	negative	negative	negative	negative	negative	negative
3014TR1899	A	positive	negative	negative	negative	negative	negative	negative	negative
3018TR1903	A	negative	negative	negative	negative	positive	negative	negative	positive
3020TR1904	N	positive	negative	negative	positive	positive	negative	negative	negative
3032TR1919	N	negative	negative	negative	negative	negative	negative	negative	negative
3036TR1922	N	negative	negative	negative	negative	negative	negative	negative	negative
3037TR1924	N	negative	negative	negative	negative	negative	positive	negative	negative
3039TR1926	A	positive	negative	negative	positive	positive	negative	negative	positive
3040TR4931a	A	negative	negative	negative	negative	negative	negative	negative	positive
3042TR1928	A	negative	negative	negative	positive	negative	negative	negative	negative
3051TR1936	N	negative	negative	negative	negative	negative	negative	negative	negative
3058TR7285	N	negative	negative	negative	negative	negative	negative	negative	negative
3059TR1942	A	negative	negative	negative	negative	negative	negative	negative	positive
3067TR1952	N	negative	negative	negative	negative	positive	negative	negative	negative
3068TR1953	N	negative	negative	negative	negative	negative	negative	negative	negative
3069TR1955	N	negative	negative	negative	positive	negative	negative	negative	negative
3070TR1956	N	negative	negative	negative	negative	negative	negative	negative	negative
3071TR1957	N	negative	negative	negative	negative	positive	negative	negative	negative
3074TR1961	N	negative	negative	negative	negative	negative	negative	negative	negative
3079TR1968	N	positive	positive	negative	negative	negative	negative	negative	negative
3083TR1972	A	negative	negative	negative	negative	negative	negative	negative	negative
3085TR1979	A	negative	negative	negative	negative	negative	negative	negative	negative
3092TR1984	A	negative	negative	negative	negative	negative	negative	negative	negative
3096TR1989	N	negative	negative	negative	negative	negative	negative	negative	negative
3100TR1993	N	negative	negative	negative	positive	negative	negative	negative	negative
3101TR1994	N	negative	negative	negative	negative	positive	negative	negative	negative
3103TR1996	N	negative	negative	negative	negative	negative	negative	negative	negative
3104TR1998	N	negative	negative	negative	negative	positive	negative	negative	negative
3107TR2002	N	negative	negative	negative	positive	negative	negative	negative	negative
3109TR2003	N	negative	negative	negative	negative	negative	negative	negative	negative
3114TR2010	N	positive	negative	negative	negative	positive	negative	negative	negative
3115TR2015	A	negative	negative	negative	negative	negative	negative	negative	negative
3119TR2020	A	negative	negative	negative	negative	negative	negative	negative	negative
3121TR2024	N	negative	negative	negative	positive	negative	negative	negative	negative
3125TR2035	N	negative	negative	negative	positive	negative	negative	negative	negative
3126TR2036	N	negative	negative	negative	negative	positive	negative	negative	negative
3129TR2039	A	negative	negative	negative	negative	negative	negative	negative	negative
3137TR2051	N	negative	negative	negative	negative	negative	negative	negative	negative
3139TR2055	N	negative	negative	negative	negative	negative	negative	negative	negative
3142TR2081	A	negative	negative	positive	positive	negative	negative	negative	positive
3148TR2064	N	negative	negative	negative	negative	negative	negative	negative	negative
3156TR2074	N	negative	negative	negative	negative	negative	negative	negative	negative
3159TR2079	N	negative	negative	negative	negative	positive	negative	negative	negative
3167TR2088	N	negative	negative	negative	positive	negative	negative	negative	negative
3169TR2091	N	negative	negative	negative	negative	positive	negative	negative	negative
3173TR4127	N	negative	negative	negative	negative	negative	negative	negative	negative
3175TR2094	N	negative	negative	negative	negative	negative	negative	negative	negative
3184TR2104	A	negative	negative	negative	negative	positive	negative	negative	positive
3187TR2106	A	negative	negative	negative	negative	negative	negative	negative	negative
3201TR2131	A	negative	negative	negative	positive	negative	negative	negative	positive
3202TR2132	N	negative	negative	negative	negative	negative	negative	negative	negative
3208TR2780a	N	negative	negative	negative	negative	positive	negative	negative	positive
3210TR2142	N	negative	negative	negative	negative	negative	negative	negative	negative
3222TR2159	N	negative	negative	negative	negative	negative	negative	negative	negative
3230TR2173	N	negative	negative	negative	positive	negative	negative	negative	negative
3231TR2174	A	negative	negative	negative	negative	negative	negative	negative	negative
3236TR2180	A	negative	negative	negative	positive	negative	negative	negative	negative
3237TR2183	A	negative	negative	negative	positive	negative	negative	negative	negative
3241TR2191	N	negative	negative	negative	negative	positive	negative	negative	negative
3254TR2209	N	negative	negative	negative	negative	negative	negative	negative	negative
3255TR6729	N	negative	negative	negative	negative	positive	positive	negative	negative
3258TR2214	A	negative	negative	negative	negative	negative	negative	negative	negative
3265TR2223	N	negative	negative	negative	negative	positive	negative	negative	negative
3268TR2228	N	negative	negative	negative	negative	negative	negative	negative	positive
3270TR2231	N	negative	negative	negative	negative	negative	negative	negative	negative
3276TR2236	N	negative	negative	negative	positive	negative	negative	negative	negative
3285TR2245	N	negative	negative	negative	negative	negative	negative	negative	positive
3286TR2246	A	negative	negative	negative	positive	negative	negative	negative	positive
3290TR2253	A	negative	negative	negative	negative	negative	negative	negative	positive
3291TR2255	A	positive	negative	negative	negative	negative	negative	negative	positive
3292TR2256	N	negative	negative	negative	negative	positive	negative	negative	negative
3299TR2265	N	negative	negative	negative	negative	negative	negative	positive	negative
3302TR2270	N	negative	negative	negative	positive	negative	negative	negative	negative
3303TR2272	N	negative	negative	negative	negative	negative	negative	negative	negative
3307TR2276	A	negative	negative	negative	negative	positive	negative	negative	negative
3308TR2278	A	negative	negative	negative	negative	positive	negative	positive	negative
3309TR2277	A	negative	negative	negative	negative	negative	positive	negative	positive
3339TR2315	N	negative	negative	negative	negative	positive	negative	negative	negative
3340TR2316	N	negative	negative	negative	negative	positive	negative	positive	positive
3344TR2318	N	negative	negative	negative	negative	negative	negative	negative	negative
3354TR2327	N	negative	negative	negative	positive	negative	positive	negative	negative
3376TR2362	N	negative	negative	negative	positive	negative	negative	negative	negative
3379TR5087b	N	negative	negative	negative	negative	negative	negative	negative	negative
3383TR2371	N	negative	negative	negative	positive	negative	negative	negative	negative
3395TR2385	N	negative	negative	negative	negative	positive	negative	negative	negative
3403TR2396	N	negative	negative	negative	negative	positive	negative	negative	negative
3405TR2397	N	negative	negative	negative	negative	negative	negative	negative	negative
3406TR2399	N	negative	negative	positive	negative	positive	negative	negative	positive
3408TR2400	N	negative	negative	negative	negative	negative	negative	negative	negative
3409TR2403	A	negative	negative	negative	negative	negative	negative	negative	negative
3413TR2407	N	negative	negative	negative	negative	negative	negative	negative	negative
3420TR2414	N	negative	negative	negative	negative	negative	negative	negative	negative
3421TR2415	N	negative	positive	negative	negative	negative	negative	negative	negative
3424TR2419	N	positive	negative	negative	negative	positive	negative	negative	negative
3425TR2422	A	negative	negative	negative	negative	negative	negative	negative	negative
3426TR2425	N	negative	negative	negative	negative	negative	negative	negative	negative
3427TR2426	N	negative	negative	negative	negative	negative	negative	negative	negative
3432TR2435	A	negative	negative	negative	negative	negative	negative	negative	negative
3435TR2438	A	negative	negative	negative	negative	negative	negative	negative	negative
3436TR2441	N	negative	negative	negative	negative	negative	negative	negative	negative
3437TR2445	A	negative	negative	negative	negative	negative	positive	positive	negative
3438TR2443	A	negative	negative	negative	negative	negative	negative	negative	negative
3440TR2448	A	negative	negative	negative	negative	negative	negative	negative	negative
3441TR2449	N	negative	negative	negative	negative	negative	negative	negative	negative
3446TR2456	N	negative	negative	negative	positive	negative	negative	negative	negative
3450TR2463	A	positive	negative	negative	negative	negative	negative	negative	negative
3451TR4063	N	negative	negative	negative	negative	negative	negative	negative	negative
3453TR2465	N	negative	negative	negative	negative	negative	negative	negative	negative
3455TR2466	N	negative	negative	negative	negative	negative	positive	negative	negative
3456TR2469	N	negative	negative	negative	negative	negative	negative	negative	negative
3468TR2485	N	negative	negative	negative	positive	negative	negative	negative	positive
3475TR2493	N	negative	negative	negative	positive	negative	negative	negative	negative
3477TR3786a	N	negative	negative	negative	negative	negative	negative	positive	negative
3479TR2497	N	negative	negative	negative	negative	negative	negative	negative	negative
3486TR2503	A	negative	negative	negative	negative	negative	negative	negative	negative
3489TR2505	N	negative	negative	negative	negative	negative	negative	negative	negative
3491TR2507	A	negative	negative	negative	negative	negative	negative	negative	negative
3496TR2515	N	negative	negative	negative	negative	negative	negative	negative	negative
3502TR2520	N	negative	negative	negative	negative	positive	negative	negative	negative
3503TR2521	N	negative	negative	negative	negative	negative	negative	negative	negative
3505TR2524	A	positive	negative	negative	positive	positive	negative	negative	positive
3508TR2527	N	negative	negative	negative	negative	negative	negative	negative	negative
3510TR2531	N	negative	negative	negative	negative	negative	negative	negative	negative
3515TR2534	A	negative	negative	negative	positive	negative	negative	negative	negative
3523TR2539	N	negative	negative	negative	negative	negative	negative	negative	negative
3527TR2101b	A	negative	negative	negative	negative	negative	negative	negative	negative
3530TR2548	A	negative	negative	negative	negative	negative	negative	negative	positive
3550TR2920	N	negative	negative	negative	negative	positive	negative	negative	negative
3552TR2575	N	negative	negative	negative	negative	positive	negative	negative	positive
3568TR2603	N	negative	negative	negative	negative	negative	negative	negative	positive
3584TR2619	N	negative	negative	negative	negative	negative	negative	negative	positive
3590TR2627	N	negative	negative	negative	negative	negative	negative	negative	negative
3594TR4027	N	negative	negative	negative	negative	negative	negative	negative	negative
3604TR2643	N	negative	negative	negative	positive	negative	negative	negative	positive
3609TR2649	A	negative	negative	negative	negative	negative	negative	negative	positive
3618TR4601a	N	negative	negative	negative	negative	negative	negative	negative	negative
3620TR2664	N	negative	negative	negative	negative	negative	negative	negative	negative
3628TR2671	N	negative	negative	negative	negative	negative	negative	negative	negative
3644TR3561	N	negative	negative	negative	negative	negative	positive	negative	negative
3668TR2735	N	negative	negative	negative	negative	negative	positive	positive	positive
3669TR2728	N	negative	negative	negative	negative	negative	negative	negative	negative
3672TR2740	N	negative	negative	negative	negative	negative	negative	negative	negative
3679TR1251b	A	negative	negative	negative	positive	negative	negative	negative	positive
3706TR2764	N	negative	negative	negative	negative	negative	negative	negative	negative
3708TR3083b	N	negative	negative	negative	positive	positive	negative	negative	negative
3726TR2800	N	negative	negative	negative	negative	positive	negative	negative	negative
3729TR2801	N	negative	negative	negative	negative	negative	negative	negative	negative
3737TR2814	N	negative	negative	negative	negative	positive	negative	negative	negative
3742TR2813	N	negative	negative	negative	negative	negative	negative	negative	negative
3772TR2862	N	negative	negative	negative	negative	negative	negative	negative	negative
3785TR2880	N	negative	negative	negative	negative	negative	negative	negative	negative
3796TR2909	N	negative	negative	negative	negative	negative	negative	negative	negative
3811TR2905	N	negative	negative	negative	negative	positive	negative	negative	negative
3812TR4331	N	negative	negative	negative	negative	negative	negative	negative	negative
3815TR2908	A	negative	negative	negative	negative	negative	negative	negative	positive
3819TR2915	N	negative	negative	negative	negative	negative	negative	negative	positive
3820TR2914	A	negative	negative	negative	negative	negative	negative	negative	negative
3830TR2924	N	negative	negative	negative	negative	negative	negative	negative	negative
3834TR2933	N	negative	negative	negative	negative	negative	negative	negative	negative
3841TR2940	A	negative	negative	negative	positive	negative	negative	negative	negative
3846TR2952	N	negative	negative	negative	negative	negative	negative	negative	negative
3850TR2948	A	negative	negative	negative	negative	negative	negative	negative	positive
3851TR7502	N	negative	negative	negative	negative	positive	negative	negative	negative
3859TR3576	N	negative	negative	negative	negative	negative	negative	negative	negative
3867TR2964	N	negative	negative	negative	negative	negative	negative	negative	negative
3872TR2968	N	negative	negative	negative	negative	negative	negative	negative	negative
3882TR2980	A	negative	negative	negative	positive	negative	negative	negative	negative
3883TR2977	N	negative	negative	negative	positive	negative	negative	negative	negative
3890TR2981	N	negative	negative	negative	negative	negative	negative	negative	negative
3891TR2986	N	negative	negative	negative	negative	negative	negative	negative	negative
3900TR2990	A	negative	negative	negative	negative	negative	positive	positive	negative
3901TR2991	N	negative	negative	negative	negative	positive	negative	negative	negative
3903TR3003	N	negative	negative	negative	positive	negative	negative	negative	negative
3915TR3015	N	negative	negative	positive	negative	negative	negative	negative	negative
3923TR3023	N	negative	negative	negative	negative	negative	negative	negative	negative
3950TR3048	N	negative	negative	negative	negative	negative	negative	negative	negative
3952TR6853	A	positive	negative	negative	positive	negative	negative	negative	positive
3959TR3056	N	negative	negative	negative	negative	positive	negative	negative	negative
3963TR3062	A	positive	negative	negative	negative	negative	negative	negative	negative
3967TR3069	N	negative	negative	negative	positive	negative	negative	negative	negative
3970TR3072	A	negative	negative	negative	negative	positive	negative	negative	negative
3974TR3076	N	negative	negative	negative	negative	negative	negative	positive	negative
3984TR8492a	A	negative	negative	negative	negative	negative	negative	negative	positive
3999TR7345	N	negative	negative	negative	negative	negative	negative	negative	negative
4009TR3122	N	negative	negative	negative	negative	negative	negative	negative	positive
4012TR3117	N	negative	negative	negative	negative	negative	negative	negative	positive
4013TR3116	A	negative	negative	negative	negative	negative	negative	negative	negative
4014TR3118	N	negative	negative	negative	negative	negative	negative	negative	negative
4026TR3160	N	negative	negative	negative	negative	negative	negative	negative	negative
4029TR3149	A	negative	negative	negative	negative	negative	negative	negative	negative
4042TR3168	N	negative	negative	negative	negative	negative	negative	negative	negative
4057TR3187	N	negative	negative	negative	negative	negative	negative	negative	negative
4059TR3194	N	negative	negative	negative	negative	negative	positive	negative	positive
4075TR3228	A	negative	negative	negative	positive	positive	negative	positive	negative
4076TR4355a	A	negative	negative	negative	negative	negative	negative	negative	positive
4081TR3220	A	negative	negative	negative	negative	negative	negative	negative	positive
4102TR3256	N	negative	negative	negative	negative	negative	negative	negative	negative
4107TR3255	N	negative	negative	negative	negative	negative	positive	negative	negative
4110TR3261	N	negative	negative	negative	positive	positive	negative	negative	negative
4115TR3265	N	negative	negative	negative	positive	positive	negative	negative	negative
4135TR3282	N	negative	negative	negative	positive	negative	negative	negative	negative
4147TR3297	N	negative	negative	negative	positive	negative	negative	negative	negative
4152TR3300	N	negative	negative	negative	positive	negative	negative	negative	negative
4163TR3314	A	negative	negative	negative	positive	negative	negative	negative	negative
4164TR3356	N	negative	negative	negative	positive	positive	negative	negative	negative
4174TR3350	N	negative	negative	negative	positive	positive	negative	negative	negative
4176TR3328	N	negative	negative	negative	positive	negative	negative	negative	negative
4180TR3335	N	negative	negative	negative	positive	negative	negative	negative	negative
4185TR3460	N	positive	negative	negative	positive	positive	negative	negative	positive
4186TR3820	N	negative	negative	negative	negative	positive	negative	negative	negative
4190TR3349	A	negative	negative	negative	positive	positive	negative	positive	negative
4198TR3363	N	negative	negative	negative	positive	negative	positive	negative	positive
4204TR3379	N	negative	negative	negative	positive	negative	negative	negative	positive
4205TR3383	N	negative	negative	negative	positive	positive	negative	negative	negative
4218TR3394	N	negative	negative	negative	positive	negative	negative	negative	negative
4226TR3404	N	negative	negative	negative	positive	negative	negative	negative	negative
4230TR3407	N	negative	negative	negative	positive	negative	negative	negative	negative
4241TR3430	N	negative	negative	negative	positive	negative	negative	negative	negative
4257TR3453	N	negative	negative	negative	positive	negative	negative	negative	negative
4261TR3459	N	negative	negative	negative	positive	negative	negative	negative	negative
4269TR3468	N	negative	negative	negative	negative	negative	negative	negative	negative
4282TR3482	A	negative	negative	negative	negative	negative	negative	negative	negative
4285TR3488	A	negative	negative	negative	negative	negative	negative	negative	negative
4287TR3497	A	negative	negative	negative	negative	negative	negative	negative	negative
4311TR3522	N	negative	negative	negative	negative	negative	negative	negative	positive
4318TR3529	N	negative	negative	negative	positive	negative	negative	negative	negative
4322TR3538	N	negative	negative	negative	positive	positive	positive	negative	negative
4333TR3555	N	negative	negative	negative	negative	positive	negative	negative	negative
4334TR3554	A	negative	negative	negative	negative	negative	negative	negative	positive
4339TR3563	N	negative	negative	negative	positive	negative	negative	negative	negative
4349TR3579	A	negative	negative	negative	negative	negative	positive	negative	negative
4356TR3582	A	negative	negative	negative	negative	positive	negative	negative	negative
4361TR3584	N	negative	negative	negative	negative	negative	negative	negative	negative
4369TR3594	N	negative	negative	negative	positive	negative	negative	negative	negative
4370TR3608	N	negative	negative	negative	positive	negative	negative	negative	negative
4371TR3601	A	negative	negative	negative	positive	positive	negative	negative	negative
4374TR3628	N	negative	negative	negative	negative	negative	negative	negative	positive
4375TR3602	N	negative	negative	negative	negative	negative	negative	negative	negative
4380TR3612	N	negative	negative	negative	negative	negative	negative	negative	positive
4384TR3616	N	negative	negative	negative	negative	negative	negative	negative	negative
4385TR3617	N	negative	negative	negative	negative	negative	negative	negative	negative
4387TR3618	N	negative	negative	negative	positive	negative	negative	negative	positive
4390TR3621	A	negative	negative	negative	negative	negative	negative	negative	negative
4399TR3634	N	negative	negative	negative	positive	positive	negative	negative	negative
4402TR3635	N	negative	negative	negative	negative	negative	negative	negative	negative
4403TR3659	N	negative	negative	negative	positive	positive	negative	negative	negative
4410TR3655	A	negative	negative	negative	positive	positive	negative	negative	positive
4413TR3647	N	negative	negative	negative	negative	negative	negative	negative	positive
4418TR3651	N	negative	negative	negative	negative	negative	negative	negative	negative
4420TR3652	A	negative	negative	negative	positive	negative	negative	negative	positive
4421TR3653	N	negative	negative	negative	positive	negative	negative	negative	negative
4425TR3656	N	negative	negative	negative	negative	positive	positive	negative	positive
4429TR3667	A	negative	negative	negative	negative	negative	negative	negative	positive
4430TR3664	N	negative	negative	negative	negative	positive	negative	negative	negative
4437TR3677	N	negative	negative	negative	negative	positive	negative	negative	negative
4439TR3678	N	negative	negative	negative	positive	positive	negative	negative	negative
4447TR3687	N	negative	negative	negative	positive	positive	negative	negative	negative
4449TR3688	N	negative	negative	negative	negative	positive	negative	negative	negative
4451TR3691	N	negative	negative	negative	negative	negative	negative	negative	negative
4452TR3695	N	negative	negative	negative	positive	negative	negative	negative	negative
4453TR3696	N	negative	negative	negative	negative	negative	negative	negative	negative
4455TR3697	N	negative	negative	negative	negative	negative	negative	negative	negative
4457TR3699	N	negative	negative	negative	positive	positive	negative	negative	negative
4460TR3703	A	negative	negative	negative	negative	positive	negative	negative	negative
4464TR3707	N	negative	negative	negative	positive	positive	negative	negative	negative
4473TR3727	A	negative	negative	negative	negative	negative	negative	negative	positive
4474TR3715	N	negative	negative	negative	negative	negative	negative	negative	negative
4480TR3721	N	negative	negative	negative	negative	negative	negative	negative	negative
4481TR3723	N	negative	negative	negative	negative	negative	negative	negative	negative
4482TR3724	N	negative	negative	negative	negative	positive	negative	negative	negative
4488TR3728	N	negative	negative	negative	negative	positive	negative	negative	negative
4500TR3739	A	negative	positive	negative	negative	positive	negative	negative	negative
4502TR3737	N	negative	negative	negative	negative	negative	negative	negative	negative
4512TR3751	N	negative	negative	negative	negative	positive	positive	negative	negative
4522TR3771	A	negative	negative	negative	negative	positive	negative	negative	positive
4548TR3788	N	negative	negative	negative	negative	negative	positive	negative	positive
4549TR3789	A	negative	negative	negative	positive	negative	negative	negative	negative
4722TR3808	N	negative	positive	negative	positive	negative	negative	positive	negative
4731TR3813	N	negative	negative	negative	negative	negative	negative	negative	negative
4740TR3869	A	negative	negative	negative	negative	negative	negative	negative	negative
4741TR3824	N	negative	negative	negative	positive	negative	negative	negative	positive
4744TR3825	N	negative	negative	negative	negative	positive	negative	negative	negative
4747TR3829	N	negative	negative	negative	negative	negative	negative	negative	negative
4750TR3831	N	negative	negative	negative	positive	negative	negative	negative	positive
4753TR3836	N	negative	negative	negative	negative	negative	negative	negative	negative
4758TR3843	N	negative	negative	negative	negative	positive	negative	negative	negative
4771TR3865	N	negative	negative	negative	negative	negative	negative	negative	negative
4773TR3862	N	negative	negative	negative	negative	positive	negative	negative	negative
4777TR3866	N	negative	negative	negative	negative	negative	negative	negative	negative
4779TR3867	N	negative	negative	negative	negative	negative	negative	negative	positive
4793TR7504	N	negative	negative	negative	negative	positive	negative	negative	negative
4802TR3895	N	negative	negative	negative	negative	negative	positive	negative	positive
4805TR3897	N	negative	negative	negative	negative	negative	negative	negative	positive
4807TR3901	N	negative	negative	negative	negative	negative	negative	negative	negative
4824TR3918	N	negative	negative	negative	positive	negative	negative	negative	negative
4826TR3922	A	negative	negative	negative	negative	negative	negative	negative	negative
4827TR3923	N	negative	negative	negative	negative	negative	positive	negative	negative
4828TR3926	N	negative	negative	negative	negative	negative	negative	negative	negative
4832TR3930	N	negative	negative	negative	negative	negative	negative	negative	positive
4839TR3937	N	negative	negative	negative	negative	negative	positive	negative	negative
4844TR3946	N	negative	negative	negative	negative	negative	negative	negative	negative
4845TR3947	A	negative	negative	negative	negative	negative	negative	negative	positive
4855TR3957	N	negative	negative	negative	negative	negative	negative	negative	negative
4857TR3959	N	negative	negative	negative	positive	positive	negative	negative	negative
4858TR3960	N	negative	negative	negative	negative	positive	negative	negative	negative
4861TR3964	N	negative	negative	negative	negative	negative	negative	negative	negative
4865TR3969	N	negative	negative	negative	negative	negative	negative	negative	negative
4877TR3974	N	negative	negative	negative	negative	negative	negative	negative	negative
4878TR3976	A	negative	negative	negative	negative	negative	negative	negative	negative
4879TR3977	N	negative	negative	negative	negative	positive	negative	negative	negative
4883TR3980	N	negative	negative	negative	negative	positive	negative	negative	negative
4885TR3985	N	negative	negative	negative	negative	negative	negative	negative	negative
4887TR3982	N	negative	negative	negative	negative	positive	negative	negative	negative
4888TR3984	N	negative	negative	negative	negative	negative	negative	negative	positive
4896TR3993	N	negative	negative	negative	negative	negative	negative	negative	negative
4902TR1825a	N	negative	negative	negative	negative	negative	negative	negative	negative
4912TR4021	N	negative	negative	negative	positive	positive	negative	negative	negative
4916TR4023	N	positive	negative	negative	negative	negative	negative	negative	negative
4921TR4031	N	negative	negative	negative	negative	positive	negative	negative	negative
4927TR4038	N	negative	negative	negative	negative	positive	negative	negative	negative
4929TR4040	N	negative	negative	negative	positive	negative	negative	negative	negative
4936TR4051	N	negative	negative	negative	positive	negative	negative	negative	negative
4937TR4053	A	negative	negative	negative	negative	negative	negative	negative	negative
4938TR4052	N	negative	negative	negative	negative	positive	negative	negative	negative
4942TR4057	N	negative	negative	negative	negative	negative	negative	negative	negative
4946TR4060	N	negative	negative	negative	negative	negative	negative	negative	positive
4954TR4069	A	negative	negative	negative	negative	positive	negative	negative	positive
4959TR4070	N	negative	negative	negative	negative	positive	negative	negative	negative
4969TR4089	N	negative	negative	negative	negative	negative	negative	negative	negative
4971TR4091	A	negative	negative	negative	negative	negative	negative	negative	positive
4972TR4146	N	negative	negative	negative	negative	negative	negative	negative	negative
4973TR4094	A	negative	negative	negative	positive	negative	negative	positive	negative
4977TR4099	N	negative	negative	negative	negative	negative	negative	negative	negative
4978TR4101	N	negative	negative	negative	negative	negative	negative	negative	negative
4979TR4102	N	negative	negative	negative	positive	negative	negative	negative	negative
4980TR4103	N	negative	negative	negative	negative	negative	negative	positive	positive
4981TR4104	N	negative	negative	negative	negative	negative	negative	negative	negative
4983TR4105	A	negative	negative	negative	negative	negative	negative	negative	negative
4984TR4106	N	negative	negative	negative	negative	negative	negative	negative	negative
4985TR4111	A	negative	negative	negative	negative	positive	negative	negative	negative
4986TR4107	N	negative	negative	negative	positive	negative	negative	negative	negative
4988TR4110	N	negative	negative	negative	negative	negative	negative	negative	negative
4990TR4113	N	negative	negative	negative	positive	negative	negative	negative	negative
4991TR4114	N	negative	negative	negative	negative	negative	negative	negative	negative
4995TR4118	N	negative	negative	negative	negative	negative	negative	negative	negative
4998TR4121	N	negative	negative	negative	positive	negative	negative	negative	positive
5006TR4129	N	negative	negative	negative	negative	negative	negative	negative	negative
5012TR4133	N	negative	negative	negative	negative	negative	negative	negative	negative
5015TR4137	N	negative	negative	negative	positive	negative	negative	negative	negative
5026TR4148	N	negative	negative	negative	negative	negative	negative	negative	negative
5027TR4149	N	negative	negative	negative	negative	negative	negative	negative	negative
5031TR4151	N	negative	negative	negative	negative	negative	negative	negative	negative
5035TR4155	N	negative	negative	negative	negative	negative	negative	negative	positive
5038TR4158	N	negative	negative	negative	negative	positive	negative	negative	negative
5045TR4164	A	negative	negative	negative	negative	positive	negative	negative	positive
5055TR4174	A	negative	negative	negative	negative	negative	negative	negative	negative
5058TR4177	A	positive	negative	negative	negative	positive	negative	negative	negative
5060TR4180	N	negative	negative	negative	negative	negative	negative	negative	positive
5061TR4183	A	negative	negative	negative	negative	positive	negative	negative	positive
5065TR4189	N	negative	negative	negative	negative	negative	negative	negative	negative
5068TR4193	N	negative	negative	negative	negative	negative	negative	negative	negative
5069TR4199	N	negative	negative	negative	positive	negative	negative	negative	negative
5071TR4197	N	negative	negative	negative	negative	negative	negative	negative	negative
5076TR4205	A	negative	negative	negative	negative	negative	negative	negative	positive
5082TR4209	N	negative	negative	negative	negative	negative	negative	negative	negative
5084TR4214	N	negative	negative	negative	positive	negative	negative	negative	negative
5087TR4217	A	negative	negative	negative	negative	positive	negative	negative	negative
5088TR4220	A	negative	negative	negative	negative	negative	negative	negative	negative
5089TR4221	N	negative	negative	negative	negative	positive	negative	negative	negative
5095TR4223	N	negative	positive	negative	negative	positive	negative	negative	negative
5097TR4225	N	negative	negative	negative	negative	negative	negative	negative	positive
5098TR4226	N	negative	negative	negative	negative	negative	negative	negative	negative
5099TR4227	N	negative	negative	negative	negative	positive	negative	negative	negative
5102TR4231	N	negative	negative	negative	negative	negative	negative	negative	negative
5104TR4237	N	negative	negative	negative	negative	positive	negative	negative	positive
5117TR4246	N	negative	negative	negative	negative	positive	negative	negative	positive
5123TR4258	N	negative	negative	negative	negative	negative	negative	negative	negative
5125TR4257	N	negative	negative	negative	negative	positive	negative	negative	negative
5155TR4292	N	negative	negative	negative	negative	negative	negative	negative	negative
5156TR4294	N	negative	negative	negative	negative	negative	negative	negative	positive
5157TR4298	N	negative	negative	negative	negative	negative	negative	negative	positive
5159TR4295	N	negative	negative	negative	negative	negative	negative	negative	negative
5161TR4296	N	negative	negative	negative	negative	positive	negative	negative	negative
5163TR4300	N	negative	negative	negative	positive	negative	negative	negative	positive
5164TR4301	N	negative	negative	negative	negative	negative	negative	negative	negative
5172TR4311	A	negative	negative	negative	negative	positive	negative	negative	positive
5174TR4310	N	negative	negative	negative	negative	negative	negative	negative	negative
5184TR4326	N	negative	negative	negative	negative	negative	negative	negative	positive
5185TR4328	N	negative	negative	negative	positive	negative	negative	negative	negative
5186TR4329	N	negative	negative	negative	negative	negative	negative	negative	negative
5188TR4335	N	negative	negative	negative	positive	negative	negative	positive	negative
5192TR4338	N	negative	negative	negative	positive	negative	negative	negative	negative
5193TR4341	N	negative	negative	negative	negative	negative	negative	negative	negative
5194TR4342	N	negative	negative	negative	negative	negative	negative	negative	negative
5195TR4344	N	negative	negative	negative	positive	negative	negative	negative	negative
5452TR2894a	N	negative	negative	negative	positive	negative	negative	negative	negative
5926TR1249b	N	negative	negative	negative	negative	positive	negative	negative	negative
6086TR0157b	N	negative	negative	negative	negative	positive	negative	negative	negative
6131TR6966	N	positive	negative	negative	negative	negative	negative	negative	positive
6357TR5565	A	negative	negative	negative	negative	negative	negative	negative	negative
6507TR1654b	A	negative	negative	negative	negative	positive	negative	negative	negative
6913TR0681a	N	negative	negative	negative	negative	negative	negative	negative	negative
6931TR6990	N	negative	negative	negative	negative	negative	negative	positive	negative
7089TR6768	N	negative	negative	negative	negative	negative	negative	negative	negative
7282TR6661	N	negative	negative	negative	negative	positive	negative	negative	positive
7320TR8032	N	negative	negative	negative	negative	positive	negative	negative	negative
7325TR6685	N	negative	negative	negative	negative	negative	negative	negative	negative
7329TR6687	N	negative	negative	negative	negative	negative	negative	negative	positive
7335TR6690	N	negative	negative	negative	negative	negative	negative	negative	negative
7347TR6696	N	negative	negative	negative	negative	negative	negative	negative	positive
7354TR6701	N	negative	negative	negative	negative	negative	negative	positive	negative
7357TR6704	N	negative	negative	negative	negative	negative	negative	negative	negative
7360TR6707	N	negative	negative	negative	negative	negative	negative	negative	negative
7363TR6710	N	negative	negative	negative	negative	negative	negative	negative	negative
7366TR6724	N	negative	negative	negative	negative	negative	negative	negative	negative
7367TR6748	A	negative	negative	negative	positive	negative	negative	negative	negative
7377TR6739	A	negative	negative	negative	negative	negative	negative	negative	positive
7381TR6745	N	negative	negative	negative	negative	negative	negative	negative	negative
7390TR6754	N	negative	negative	negative	negative	positive	negative	negative	negative
7391TR6755	N	negative	negative	negative	negative	negative	negative	positive	negative
7395TR6758	N	negative	negative	negative	negative	negative	negative	negative	positive
7397TR6761	N	negative	negative	negative	negative	positive	negative	negative	negative
7402TR6766	N	negative	negative	negative	negative	negative	negative	positive	positive
7403TR6767	N	negative	negative	negative	negative	negative	negative	negative	positive
7405TR6769	N	negative	negative	negative	negative	negative	negative	negative	negative
7411TR6773	N	negative	negative	negative	positive	negative	negative	negative	positive
7412TR6772	N	negative	negative	negative	positive	negative	negative	negative	positive
7418TR6778	A	negative	negative	negative	negative	negative	negative	negative	negative
7426TR6785	N	negative	negative	negative	negative	negative	negative	negative	negative
7427TR6787	A	negative	negative	negative	negative	positive	negative	negative	negative
7429TR6789	N	negative	negative	negative	negative	negative	negative	negative	negative
7430TR6790	N	negative	negative	negative	negative	negative	negative	negative	negative
7433TR6793	N	negative	negative	negative	negative	positive	negative	negative	negative
7434TR6794	N	negative	negative	negative	positive	negative	negative	negative	negative
7440TR6798	N	negative	negative	negative	negative	positive	negative	negative	negative
7441TR7079	N	negative	negative	negative	positive	negative	negative	negative	positive
7442TR6799	N	negative	negative	negative	negative	negative	negative	negative	negative
7445TR6801	N	negative	negative	negative	negative	negative	negative	negative	negative
7451TR6807	N	negative	negative	negative	negative	positive	negative	negative	negative
7454TR6812	N	negative	negative	negative	positive	negative	negative	negative	negative
7464TR6826	A	negative	negative	negative	positive	negative	negative	negative	negative
7472TR6835	N	negative	negative	negative	positive	positive	negative	negative	positive
7473TR6834	N	negative	negative	negative	negative	negative	negative	positive	negative
7474TR6837	N	negative	negative	negative	positive	negative	negative	negative	negative
7480TR6841	A	positive	negative	negative	negative	positive	negative	negative	positive
7483TR6844	N	positive	negative	negative	negative	positive	negative	negative	positive
7484TR6845	A	negative	negative	negative	negative	positive	negative	negative	negative
7487TR6851	N	negative	negative	negative	negative	positive	negative	negative	negative
7492TR6857	N	negative	negative	negative	negative	positive	negative	negative	negative
7498TR6861	A	negative	negative	negative	negative	positive	negative	negative	positive
7499TR6863	N	negative	negative	negative	negative	negative	negative	positive	negative
7500TR6864	N	negative	negative	negative	positive	negative	negative	negative	negative
7504TR6871	N	negative	negative	negative	positive	positive	negative	negative	negative
7508TR6883	N	positive	negative	negative	negative	positive	negative	negative	negative
7511TR6888	A	negative	negative	negative	positive	positive	negative	positive	positive
7512TR6887	A	negative	negative	negative	negative	positive	negative	negative	negative
7519TR6894	N	negative	negative	negative	negative	positive	positive	negative	negative
7520TR6895	N	negative	negative	negative	positive	negative	negative	negative	negative
7524TR6901	N	negative	negative	negative	positive	negative	negative	negative	negative
7526TR6902	A	negative	negative	negative	negative	negative	positive	negative	negative
7527TR6903	N	positive	negative	negative	negative	positive	negative	negative	negative
7529TR6905	A	negative	negative	negative	negative	negative	negative	negative	positive
7531TR6909	N	negative	negative	negative	negative	negative	negative	positive	negative
7535TR6910	N	negative	negative	negative	positive	negative	negative	negative	negative
7540TR6917	N	negative	negative	negative	positive	positive	negative	positive	negative
7546TR6927	A	positive	negative	negative	negative	negative	negative	negative	negative
7551TR6929	N	negative	negative	negative	negative	negative	negative	negative	negative
7557TR6934	N	negative	negative	negative	negative	negative	negative	negative	negative
7560TR6938	N	negative	negative	negative	negative	negative	negative	negative	negative
7562TR6941	N	negative	negative	negative	negative	positive	negative	negative	negative
7565TR6943	N	negative	negative	negative	positive	negative	negative	negative	negative
7566TR6945	A	negative	negative	negative	negative	negative	negative	negative	negative
7567TR6946	A	negative	negative	negative	negative	positive	negative	negative	positive
7572TR6949	N	negative	negative	negative	positive	negative	negative	positive	negative
7575TR6956	N	negative	negative	negative	negative	positive	negative	negative	negative
7578TR6959	N	negative	negative	negative	negative	negative	negative	negative	negative
7580TR6964	N	negative	negative	negative	negative	negative	negative	positive	negative
7584TR6981	N	negative	negative	negative	negative	negative	negative	negative	negative
7591TR6987	N	negative	negative	negative	negative	negative	negative	negative	negative
7594TR6991	N	negative	negative	negative	negative	negative	negative	negative	negative
7602TR6998	A	negative	negative	negative	negative	negative	negative	negative	positive
7606TR7000	A	negative	negative	negative	negative	negative	negative	negative	positive
7608TR7002	N	negative	negative	negative	negative	negative	negative	negative	positive
7610TR7003	A	negative	negative	negative	negative	negative	negative	negative	negative
7612TR7007	N	negative	negative	negative	negative	positive	negative	negative	negative
7614TR7010	N	negative	negative	negative	negative	negative	positive	negative	negative
7617TR7016	A	negative	negative	negative	negative	negative	positive	negative	negative
7618TR7017	N	negative	negative	negative	negative	positive	positive	negative	negative
7621TR7027	N	negative	negative	negative	positive	negative	negative	negative	negative
7622TR7031	N	negative	negative	negative	negative	negative	negative	negative	negative
7625TR7034	A	negative	negative	negative	negative	negative	negative	negative	positive
7627TR7036	N	negative	negative	negative	negative	negative	negative	negative	negative
7629TR7039	N	negative	negative	negative	negative	negative	negative	negative	positive
7630TR7040	N	negative	negative	negative	positive	negative	negative	negative	negative
7631TR7041	N	negative	negative	negative	negative	negative	negative	negative	negative
7633TR7042	N	negative	negative	negative	negative	negative	negative	negative	negative
7635TR7046	N	negative	negative	negative	negative	negative	positive	negative	positive
7636TR7047	A	negative	negative	negative	negative	negative	negative	negative	positive
7638TR7051	A	negative	negative	negative	negative	negative	negative	negative	negative
7641TR7053	N	negative	negative	negative	negative	negative	negative	negative	negative
7642TR7054	A	negative	negative	negative	negative	negative	negative	negative	negative
7644TR7056	N	negative	negative	negative	negative	negative	negative	negative	negative
7645TR7057	N	negative	negative	negative	negative	positive	negative	negative	positive
7652TR7060	N	negative	negative	negative	negative	negative	negative	negative	positive
7660TR7068	N	negative	negative	negative	negative	positive	negative	negative	negative
7671TR7077	A	negative	negative	negative	negative	negative	negative	negative	negative
7676TR7083	N	negative	negative	negative	negative	negative	negative	negative	negative
7681TR7088	A	negative	negative	negative	negative	negative	negative	negative	negative
7687TR7097	N	negative	negative	negative	negative	negative	negative	negative	negative
7688TR7098	N	negative	negative	negative	negative	negative	negative	negative	positive
7689TR7100	N	negative	negative	negative	negative	negative	negative	negative	negative
7690TR7101	N	negative	negative	negative	negative	negative	negative	negative	negative
7693TR7106	N	negative	negative	negative	negative	negative	negative	positive	negative
7695TR7107	A	negative	negative	negative	negative	positive	negative	negative	negative
7696TR7108	A	negative	positive	negative	negative	negative	negative	negative	negative
7698TR7115	N	negative	negative	negative	negative	negative	negative	negative	negative
7699TR7118	A	negative	negative	negative	negative	negative	negative	positive	negative
7700TR7160	A	negative	negative	negative	negative	positive	negative	negative	negative
7704TR7123	A	negative	negative	negative	negative	positive	negative	negative	negative
7709TR7131	N	negative	negative	negative	negative	negative	positive	negative	negative
7712TR7135	N	negative	negative	negative	negative	positive	negative	negative	negative
7714TR7139	A	negative	negative	negative	negative	negative	negative	negative	negative
7715TR7140	N	negative	negative	negative	negative	negative	negative	negative	negative
7717TR7144	N	negative	negative	negative	negative	positive	negative	negative	negative
7720TR7149	N	negative	negative	negative	negative	negative	negative	positive	negative
7722TR7156	N	negative	negative	negative	negative	negative	negative	negative	negative
7724TR7153	N	negative	negative	negative	positive	negative	negative	negative	negative
7729TR7159	N	negative	negative	negative	positive	positive	negative	negative	negative
7731TR7163	A	negative	negative	negative	negative	positive	negative	negative	negative
7732TR7235	N	negative	negative	negative	positive	negative	negative	negative	positive
7733TR7168	N	negative	negative	negative	negative	positive	negative	negative	positive
7736TR7171	N	negative	negative	negative	positive	positive	negative	negative	positive
7737TR7173	N	negative	negative	negative	negative	negative	negative	negative	negative
7740TR7174	N	negative	negative	negative	positive	negative	negative	negative	negative
7742TR7176	A	negative	negative	negative	negative	positive	negative	negative	negative
7743TR7178	A	negative	negative	negative	positive	negative	negative	negative	positive
7745TR7177	N	negative	negative	negative	positive	negative	negative	negative	negative
7746TR7182	N	negative	negative	negative	negative	negative	positive	negative	positive
7749TR7186	N	negative	negative	negative	negative	negative	negative	negative	negative
7752TR7190	N	positive	negative	negative	negative	negative	negative	negative	negative
7754TR7191	N	negative	negative	negative	negative	positive	negative	negative	negative
7755TR7193	A	negative	negative	negative	negative	negative	negative	positive	positive
7757TR7195	A	negative	negative	negative	negative	positive	negative	negative	negative
7763TR7200	A	negative	negative	negative	positive	negative	negative	negative	positive
7767TR7205	N	negative	negative	negative	negative	negative	negative	negative	negative
7769TR7207	N	positive	negative	negative	negative	negative	negative	negative	negative
7771TR7214	N	negative	negative	negative	negative	negative	negative	negative	positive
7774TR7211	A	negative	negative	negative	negative	negative	negative	negative	negative
7775TR7212	N	negative	negative	negative	negative	negative	negative	negative	negative
7777TR7213	A	negative	negative	negative	negative	negative	negative	negative	negative
7778TR7215	N	negative	negative	negative	negative	negative	negative	negative	positive
7783TR7223	N	negative	negative	negative	negative	negative	negative	negative	negative
7786TR7225	N	negative	negative	negative	negative	negative	negative	negative	negative
7788TR7226	N	negative	negative	negative	negative	negative	negative	negative	negative
7791TR7230	N	negative	negative	negative	negative	negative	negative	positive	negative
7792TR7231	N	negative	negative	negative	negative	positive	positive	positive	positive
7793TR7232	N	negative	negative	negative	negative	negative	positive	negative	positive
7794TR7233	A	negative	negative	positive	negative	negative	negative	negative	negative
7796TR7234	N	negative	negative	negative	positive	negative	negative	negative	negative
7797TR7236	A	negative	negative	negative	negative	positive	negative	negative	positive
7798TR7237	N	negative	negative	negative	negative	positive	negative	negative	negative
7799TR7238	N	negative	negative	negative	negative	negative	negative	negative	negative
7801TR7243	A	negative	negative	negative	negative	negative	negative	negative	negative
7802TR7244	A	negative	negative	negative	positive	positive	negative	negative	positive
7808TR7250	A	negative	negative	negative	negative	negative	negative	negative	negative
7811TR7256	N	negative	negative	negative	negative	positive	negative	negative	negative
7813TR7257	N	negative	negative	negative	negative	negative	negative	negative	negative
7814TR7259	A	negative	negative	negative	negative	negative	negative	negative	negative
7815TR7260	N	negative	negative	negative	positive	positive	negative	negative	negative
7820TR7268	N	negative	negative	negative	negative	negative	negative	negative	positive
7821TR7269	N	negative	negative	negative	negative	positive	negative	negative	negative
7823TR7271	A	negative	negative	negative	negative	negative	negative	negative	negative
7826TR7272	A	negative	negative	negative	negative	negative	negative	negative	negative
7828TR7275	N	negative	negative	negative	negative	positive	negative	negative	negative
7833TR7280	N	negative	negative	negative	positive	negative	negative	negative	negative
7835TR7282	N	negative	negative	negative	negative	negative	negative	negative	negative
7837TR7283	A	negative	negative	negative	negative	negative	negative	negative	negative
7838TR7284	A	positive	negative	negative	negative	positive	negative	positive	negative
7839TR7286	A	negative	negative	negative	negative	negative	negative	negative	negative
7843TR7287	N	negative	positive	negative	negative	negative	negative	negative	positive
7848TR7288	N	negative	negative	negative	negative	negative	negative	negative	negative
7855TR7293	N	negative	negative	negative	negative	negative	negative	negative	negative
7856TR7294	N	negative	negative	negative	negative	negative	negative	negative	negative
7867TR7306	A	negative	negative	negative	negative	negative	negative	negative	negative
7869TR7307	N	negative	negative	negative	positive	negative	negative	negative	negative
7874TR7314	N	negative	negative	negative	negative	negative	negative	negative	negative
7875TR7315	N	negative	negative	negative	negative	positive	negative	negative	negative
7876TR7316	A	negative	negative	negative	positive	positive	negative	negative	negative
7879TR7318	N	negative	negative	negative	negative	negative	negative	negative	positive
7881TR7322	A	negative	negative	negative	negative	negative	negative	negative	negative
7882TR7325	A	positive	negative	negative	negative	negative	negative	negative	positive
7884TR7328	N	negative	negative	negative	positive	negative	negative	negative	negative
7886TR7330	A	positive	negative	negative	negative	negative	negative	negative	negative
7888TR7333	A	negative	negative	negative	negative	positive	negative	negative	positive
7890TR7337	A	positive	negative	negative	negative	negative	negative	negative	negative
7891TR7338	N	negative	negative	negative	negative	negative	negative	negative	negative
7892TR7340	N	negative	negative	negative	negative	negative	negative	negative	negative
7893TR7341	A	negative	negative	negative	negative	negative	negative	negative	positive
7894TR7342	A	negative	negative	negative	negative	negative	negative	negative	negative
7896TR7346	N	negative	negative	negative	positive	negative	negative	negative	negative
7899TR7349	A	negative	negative	negative	positive	positive	positive	negative	positive
7901TR7351	N	negative	negative	negative	negative	negative	negative	negative	negative
7905TR7357	N	negative	negative	negative	positive	negative	negative	negative	negative
7906TR7358	N	negative	negative	negative	negative	positive	positive	negative	positive
7907TR7361	A	negative	negative	negative	negative	negative	positive	negative	negative
7908TR7363	N	negative	negative	negative	negative	negative	negative	negative	negative
7910TR7364	A	negative	negative	negative	positive	negative	negative	negative	negative
7911TR7371	N	negative	negative	negative	positive	negative	positive	negative	negative
7914TR7366	N	negative	negative	negative	positive	negative	negative	negative	negative
7915TR7367	N	negative	negative	negative	negative	negative	negative	negative	negative
7917TR7369	N	negative	negative	negative	negative	positive	positive	negative	negative
7920TR7372	A	negative	negative	negative	negative	negative	negative	negative	negative
7921TR7373	N	negative	negative	negative	positive	negative	negative	negative	negative
7927TR7379	N	negative	negative	negative	negative	positive	negative	negative	negative
7930TR7380	N	negative	negative	negative	negative	positive	negative	negative	negative
7931TR7381	N	negative	negative	negative	negative	negative	negative	negative	negative
7934TR7383	A	negative	negative	negative	negative	negative	negative	negative	negative
7936TR7387	N	negative	negative	negative	negative	positive	negative	negative	negative
7937TR7388	A	negative	negative	negative	negative	negative	negative	negative	positive
7939TR7389	N	negative	negative	negative	positive	positive	negative	negative	negative
7943TR7390	A	negative	negative	negative	negative	positive	negative	negative	negative
7948TR7393	A	negative	negative	negative	positive	negative	negative	negative	negative
7951TR7397	N	negative	negative	negative	negative	negative	negative	negative	negative
7955TR7401	A	positive	negative	negative	negative	negative	negative	negative	negative
7957TR7403	A	positive	negative	negative	negative	positive	positive	negative	negative
7958TR7404	N	negative	negative	negative	negative	negative	negative	negative	negative
7960TR7408	N	negative	negative	negative	positive	positive	negative	negative	negative
7962TR7410	N	negative	negative	negative	negative	negative	negative	negative	positive
7967TR7416	N	negative	negative	negative	negative	negative	negative	negative	negative
7969TR7418	N	negative	negative	negative	negative	positive	negative	negative	positive
7970TR7422	A	negative	negative	negative	negative	positive	positive	negative	positive
7971TR7423	N	negative	negative	negative	negative	positive	negative	positive	positive
7979TR7431	A	negative	negative	negative	negative	negative	negative	negative	negative
7980TR7433	A	negative	negative	negative	negative	negative	negative	negative	negative
7987TR7440	N	negative	negative	negative	negative	negative	negative	negative	negative
7990TR7444	N	negative	negative	negative	negative	negative	negative	negative	negative
7992TR7445	A	negative	negative	negative	negative	negative	negative	negative	negative
7995TR7449	A	negative	negative	negative	negative	negative	negative	negative	positive
7997TR7451	A	negative	negative	negative	negative	negative	negative	negative	negative
8000TR7453	N	negative	negative	negative	negative	negative	negative	negative	negative
8017TR7468	A	negative	negative	negative	negative	negative	negative	negative	negative
8018TR7470	N	positive	negative	negative	negative	negative	negative	negative	negative
8019TR7471	A	negative	negative	negative	negative	negative	negative	negative	negative
8022TR7476	N	negative	negative	negative	positive	negative	negative	negative	negative
8023TR7477	A	negative	negative	negative	negative	negative	negative	positive	negative
8029TR7485	N	negative	negative	negative	negative	negative	negative	positive	negative
8032TR7487	N	negative	negative	negative	negative	negative	negative	negative	negative
8034TR7490	A	negative	negative	negative	positive	positive	negative	negative	positive
8037TR7493	A	negative	negative	negative	positive	negative	negative	negative	negative
8038TR7494	N	negative	negative	negative	negative	positive	negative	negative	negative
8039TR7495	N	negative	negative	negative	negative	positive	negative	negative	negative
8041TR7501	N	negative	negative	negative	negative	negative	negative	negative	negative
8044TR7505	N	negative	negative	negative	positive	positive	negative	negative	positive
8046TR7508	N	negative	negative	negative	negative	negative	negative	negative	positive
8050TR7511	N	positive	negative	negative	positive	negative	negative	negative	negative
8056TR7516	A	negative	negative	negative	negative	negative	negative	negative	negative
8059TR7518	N	negative	negative	negative	negative	negative	negative	negative	negative
8063TR7521	A	negative	negative	negative	positive	negative	negative	negative	negative
8066TR7523	A	negative	negative	negative	positive	negative	positive	positive	positive
8067TR7524	N	negative	negative	negative	negative	negative	negative	negative	negative
8069TR7525	N	negative	negative	negative	positive	negative	negative	positive	negative
8071TR7528	A	negative	negative	negative	negative	positive	negative	negative	positive
8074TR7531	A	negative	positive	negative	negative	negative	negative	negative	negative
8076TR7532	A	negative	negative	negative	negative	positive	negative	negative	positive
8078TR7534	N	negative	negative	negative	positive	negative	negative	negative	negative
8088TR7544	N	negative	negative	negative	negative	negative	negative	negative	negative
8089TR7545	N	negative	negative	negative	positive	negative	negative	negative	negative
8091TR7547	A	negative	negative	negative	negative	positive	positive	negative	negative
8092TR7551	N	negative	negative	negative	positive	negative	negative	negative	positive
8093TR7552	A	negative	negative	negative	negative	negative	negative	negative	positive
8094TR7555	A	positive	negative	negative	negative	negative	negative	negative	negative
8286TR7761	N	negative	negative	negative	negative	positive	negative	negative	negative
8410TR1690a	N	negative	negative	negative	positive	negative	negative	negative	negative
8492TR0400a	N	negative	negative	negative	positive	negative	negative	negative	negative
8509TR7909	N	negative	negative	negative	negative	positive	negative	negative	positive
8525TR7929	N	negative	negative	negative	negative	negative	negative	negative	positive
8550TR7963	N	negative	negative	negative	negative	negative	negative	negative	negative
8562TR7972	A	negative	negative	negative	negative	negative	negative	negative	positive
8567TR7977	N	negative	negative	negative	negative	negative	negative	negative	negative
8571TR7980	N	negative	negative	negative	negative	negative	negative	negative	negative
8573TR7982	N	negative	negative	negative	negative	negative	negative	negative	negative
8577TR7983	N	negative	negative	negative	negative	negative	negative	negative	negative
8580TR7986	N	negative	negative	negative	positive	negative	negative	negative	negative
8582TR7988	N	negative	negative	negative	negative	negative	positive	negative	negative
8597TR7998	N	negative	negative	negative	negative	positive	negative	negative	negative
8598TR7999	N	negative	negative	negative	negative	negative	negative	negative	negative
8599TR8000	N	negative	negative	negative	negative	positive	negative	negative	negative
8600TR5604a	N	negative	negative	negative	negative	negative	negative	negative	negative
8605TR8004	N	negative	negative	negative	negative	positive	negative	negative	negative
8616TR8015	N	negative	negative	negative	negative	negative	negative	negative	negative
8637TR8046	N	negative	negative	negative	positive	negative	positive	negative	negative
8644TR8054	A	negative	negative	negative	negative	negative	positive	negative	negative
8651TR8060	N	negative	negative	negative	positive	negative	negative	negative	negative
8661TR8069	N	negative	negative	negative	negative	negative	negative	negative	negative
8664TR8073	N	negative	negative	negative	positive	negative	negative	negative	negative
8672TR8080	A	negative	negative	negative	positive	negative	negative	negative	negative
8680TR8091	N	negative	negative	negative	negative	negative	negative	negative	negative
8682TR8093	N	negative	negative	negative	negative	negative	negative	negative	negative
8684TR8097	N	negative	negative	negative	negative	negative	negative	negative	negative
8687TR8099	N	negative	negative	negative	negative	negative	negative	negative	negative
8692TR8106	A	negative	negative	negative	negative	negative	negative	negative	positive
8694TR8109	N	negative	negative	negative	negative	negative	negative	negative	negative
8705TR8121	N	negative	negative	negative	negative	negative	negative	negative	negative
8710TR8125	N	negative	negative	negative	positive	negative	negative	negative	negative
8721TR8138	N	negative	negative	negative	negative	negative	negative	negative	negative
8732TR8147	N	negative	negative	negative	negative	negative	negative	negative	negative
8734TR8149	N	negative	negative	negative	negative	negative	positive	negative	positive
8742TR8157	N	negative	negative	negative	negative	negative	negative	negative	negative
8746TR8161	N	negative	negative	negative	positive	negative	negative	negative	positive
8759TR8182	A	negative	negative	negative	negative	negative	negative	negative	negative
8768TR8191	A	negative	negative	negative	negative	negative	negative	negative	negative
8775TR8199	A	negative	negative	negative	negative	positive	negative	negative	negative
8777TR8205	N	negative	negative	negative	negative	negative	negative	negative	negative
8783TR8214	N	negative	negative	negative	negative	positive	negative	negative	negative
8785TR8219	N	negative	negative	negative	negative	negative	negative	negative	negative
8791TR8224	A	negative	negative	negative	negative	positive	negative	negative	negative
8800TR8233	N	negative	negative	negative	negative	negative	negative	negative	negative
8801TR8234	N	negative	negative	negative	negative	positive	negative	negative	negative
8806TR8238	A	negative	negative	negative	negative	negative	negative	negative	negative
8808TR8248	N	negative	negative	negative	negative	negative	negative	negative	positive
8816TR8250	N	negative	negative	negative	negative	negative	negative	negative	negative
8825TR8259	N	negative	negative	negative	negative	negative	negative	negative	positive
8827TR8260	N	negative	negative	negative	negative	negative	negative	negative	negative
8828TR8261	A	negative	negative	negative	negative	negative	negative	negative	negative
8831TR8265	N	negative	negative	negative	negative	negative	negative	negative	negative
8853TR8292	A	negative	negative	negative	negative	negative	negative	negative	negative
8855TR3051a	N	negative	negative	negative	positive	negative	negative	negative	negative
8856TR8297	N	negative	negative	negative	negative	negative	negative	negative	negative
8861TR8301	N	negative	negative	negative	negative	positive	negative	negative	negative
8862TR8305	A	negative	negative	negative	negative	positive	negative	negative	negative
8864TR8425a	N	negative	negative	negative	positive	negative	negative	negative	positive
8873TR8320	N	negative	negative	negative	negative	negative	negative	negative	negative
8877TR8327	N	negative	negative	negative	negative	negative	negative	negative	negative
8889TR8341	A	negative	negative	negative	negative	negative	negative	negative	negative
8905TR8366	N	negative	negative	negative	negative	negative	negative	negative	negative
8912TR8374	N	negative	negative	negative	negative	positive	negative	negative	negative
8927TR8392	N	negative	negative	negative	positive	negative	negative	negative	negative
8930TR8396	A	negative	negative	negative	negative	positive	negative	negative	negative
8931TR8400	N	negative	negative	negative	positive	negative	negative	negative	negative
8943TR8409	N	negative	positive	negative	negative	negative	negative	negative	negative
8949TR5992b	A	negative	negative	negative	negative	positive	negative	negative	negative
8960TR8435	A	negative	negative	negative	negative	positive	negative	negative	negative
8964TR8441	N	negative	negative	negative	negative	negative	negative	negative	negative
8978TR8453	N	negative	negative	negative	negative	negative	negative	negative	negative
8981TR8461	A	negative	negative	negative	positive	positive	positive	positive	positive
8984TR8473	N	negative	negative	negative	positive	negative	negative	negative	negative
8986TR8471	N	negative	negative	negative	negative	negative	negative	negative	positive
8989TR8475	N	negative	negative	negative	negative	negative	negative	negative	negative
8994TR8482	A	negative	negative	negative	positive	negative	negative	negative	negative
9003TR8490	N	negative	negative	negative	positive	negative	positive	negative	positive
9008TR8531	N	negative	negative	negative	negative	negative	negative	negative	positive
9010TR8496	N	negative	negative	negative	positive	negative	negative	negative	positive
9016TR8507	N	negative	negative	negative	negative	negative	negative	negative	positive
9021TR8514	N	negative	negative	negative	negative	positive	negative	negative	negative
9023TR8517	N	negative	negative	negative	negative	positive	negative	negative	negative
9029TR8524	N	negative	negative	negative	positive	negative	negative	negative	negative
9034TR8532	N	negative	negative	negative	positive	negative	negative	negative	negative
9046TR8544	A	negative	negative	negative	negative	negative	negative	negative	negative
9059TR8563	A	negative	negative	negative	negative	positive	negative	negative	negative
9064TR8567	A	negative	negative	negative	negative	negative	negative	negative	positive
9083TR8587	A	negative	negative	negative	negative	negative	negative	negative	negative
9084TR8589	N	negative	negative	negative	negative	negative	negative	negative	negative
9086TR8591	N	negative	negative	negative	positive	negative	negative	negative	negative
9089TR8595	N	negative	negative	negative	negative	negative	negative	negative	negative
9090TR8597	N	negative	negative	negative	positive	negative	negative	negative	negative
9092TR8600	N	negative	negative	negative	negative	negative	negative	negative	negative
9093TR8602	N	negative	negative	negative	negative	negative	negative	negative	negative
9096TR8605	N	negative	negative	negative	negative	negative	negative	negative	negative
9107TR8619	N	negative	negative	negative	negative	positive	negative	negative	negative
9108TR8620	N	negative	negative	negative	negative	negative	negative	negative	negative
9121TR8642	A	negative	negative	negative	positive	negative	negative	negative	negative
9131TR8650	N	negative	negative	negative	negative	negative	negative	positive	negative
9132TR8651	N	negative	negative	negative	negative	negative	negative	negative	negative
9134TR8653	N	negative	negative	negative	negative	negative	negative	negative	negative
9137TR8657	N	negative	negative	negative	negative	negative	negative	negative	positive
9143TR8669	N	negative	negative	negative	negative	negative	negative	negative	negative
9146TR8674	N	negative	negative	negative	negative	negative	positive	negative	negative
9149TR8675	A	negative	negative	negative	negative	negative	negative	negative	negative
9151TR8692	N	negative	negative	negative	negative	negative	negative	negative	negative
9152TR8678	N	negative	negative	negative	negative	negative	negative	negative	negative
9154TR8680	N	negative	negative	negative	negative	positive	negative	negative	negative
9157TR8688	A	negative	negative	negative	negative	positive	negative	negative	negative
9162TR8694	N	negative	negative	negative	negative	positive	negative	negative	negative
9187TR8723	N	negative	negative	negative	negative	negative	negative	negative	negative
9190TR8726	N	negative	negative	negative	negative	negative	negative	negative	negative
9194TR8733	N	negative	negative	negative	negative	negative	negative	negative	negative
9205TR8751	N	negative	negative	negative	negative	negative	negative	negative	negative
9207TR8753	N	negative	negative	negative	negative	negative	negative	negative	negative
9212TR8759	A	negative	negative	negative	negative	negative	positive	negative	positive
9215TR8766	N	negative	negative	negative	positive	negative	negative	negative	negative
9242TR8797	N	negative	negative	negative	negative	negative	negative	negative	positive
9249TR8805	A	negative	negative	negative	negative	negative	negative	negative	negative
9254TR8832	N	negative	negative	negative	negative	negative	negative	negative	negative
9262TR8821	N	negative	negative	negative	negative	negative	negative	negative	positive
9265TR8824	N	negative	negative	negative	negative	negative	negative	negative	negative
9267TR8825	N	negative	negative	negative	negative	negative	negative	negative	negative
9281TR8856	A	negative	negative	negative	negative	negative	negative	negative	positive
9282TR8845	N	negative	negative	negative	negative	negative	negative	negative	negative
9290TR8862	N	negative	positive	negative	negative	negative	negative	negative	negative
9297TR8869	A	positive	negative	negative	negative	negative	negative	negative	negative
9301TR8871	N	negative	negative	negative	negative	negative	negative	negative	negative
9311TR8885	N	negative	negative	negative	negative	negative	negative	negative	negative
9326TR0950a	N	negative	negative	negative	negative	negative	negative	negative	negative
9342TR8921	N	negative	negative	negative	negative	negative	negative	negative	negative
9364TR8950	N	negative	negative	negative	negative	negative	negative	negative	positive
9366TR8965	N	negative	negative	negative	negative	positive	negative	negative	negative
9384TR8976	N	negative	negative	negative	positive	negative	negative	negative	negative
9412TR9000	N	negative	negative	negative	negative	positive	positive	negative	negative
9413TR9001	N	negative	negative	negative	negative	positive	negative	negative	negative
9416TR9003	N	negative	negative	negative	negative	positive	negative	negative	negative
9420TR9006	N	negative	positive	negative	negative	positive	negative	negative	negative
9425TR9012	N	positive	negative	negative	negative	negative	negative	negative	negative
9433TR9017	N	negative	negative	negative	negative	negative	negative	negative	negative
9434TR9020	N	negative	negative	negative	negative	negative	negative	negative	positive
9451TR9036	A	negative	negative	negative	positive	negative	negative	negative	positive
9455TR9049	N	negative	positive	negative	negative	positive	negative	negative	negative
9456TR9048	N	negative	negative	negative	negative	negative	negative	negative	negative
9467TR9066	A	negative	negative	negative	negative	positive	negative	negative	negative
9477TR9091	N	negative	negative	negative	negative	negative	negative	positive	negative
9480TR9095	A	negative	negative	negative	negative	positive	negative	negative	positive
9481TR9096	N	negative	negative	negative	negative	negative	negative	negative	negative
9485TR9112	N	negative	negative	negative	negative	positive	negative	negative	negative
9491TR9167	N	negative	negative	negative	negative	negative	negative	negative	positive
9493TR9128	A	negative	negative	negative	negative	negative	negative	negative	negative
9494TR9129	N	negative	negative	negative	negative	positive	negative	negative	negative
9495TR9130	N	negative	negative	negative	negative	negative	negative	negative	negative
9497TR9134	N	negative	negative	negative	negative	negative	negative	negative	negative
9499TR9138	N	negative	negative	negative	positive	negative	negative	negative	negative
9501TR9141	N	negative	negative	negative	negative	negative	negative	negative	negative
9504TR9148	A	negative	negative	negative	positive	negative	negative	negative	negative
9505TR9149	N	negative	negative	negative	positive	negative	negative	negative	negative
9512TR9156	N	negative	negative	negative	negative	negative	negative	negative	negative
9513TR9160	N	positive	negative	negative	negative	negative	negative	negative	positive
9517TR9165	N	negative	negative	negative	negative	negative	negative	negative	positive
9520TR9171	N	negative	negative	negative	positive	negative	negative	negative	negative
9521TR9174	N	negative	negative	negative	negative	positive	negative	negative	negative
9535TR9192	N	negative	negative	negative	negative	negative	negative	negative	negative
9536TR9194	A	negative	negative	negative	negative	negative	negative	negative	negative
9544TR9204	N	negative	negative	negative	negative	negative	negative	negative	negative
9547TR9209	N	negative	negative	negative	negative	negative	negative	negative	positive
9551TR9213	A	negative	negative	negative	negative	negative	negative	negative	negative
9552TR9212	A	negative	negative	negative	negative	negative	negative	negative	negative
9553TR9214	N	negative	negative	negative	negative	positive	negative	negative	negative
9555TR9230	N	negative	negative	negative	negative	negative	negative	negative	positive
9556TR9218	N	negative	negative	negative	negative	negative	negative	negative	negative
9557TR9222	N	negative	negative	negative	negative	positive	negative	negative	negative
9562TR9228	N	negative	negative	negative	negative	negative	negative	negative	positive
9563TR9229	N	negative	negative	negative	negative	negative	positive	negative	positive
9575TR9241	N	negative	negative	negative	negative	positive	negative	negative	negative
9613TR9280	N	negative	negative	negative	positive	negative	negative	negative	negative
9619TR9294	N	negative	negative	negative	negative	negative	negative	negative	positive
9628TR9310	A	negative	negative	negative	negative	negative	negative	negative	negative
9632TR9315	N	negative	negative	negative	negative	positive	negative	negative	negative
9638TR9321	N	negative	negative	negative	negative	negative	negative	negative	negative
9641TR9323	N	negative	negative	negative	negative	negative	negative	negative	positive
9647TR9333	N	negative	negative	negative	negative	negative	negative	negative	negative
9649TR9334	N	negative	negative	negative	negative	negative	negative	negative	negative
9657TR9408	N	negative	negative	negative	negative	positive	negative	negative	positive
9659TR9344	N	negative	negative	negative	negative	negative	negative	negative	negative
9662TR9346	N	negative	negative	negative	negative	negative	negative	negative	negative
9663TR9347	N	negative	negative	negative	negative	negative	negative	negative	negative
9669TR9358	N	negative	negative	negative	negative	negative	negative	negative	positive
9685TR9380	A	negative	negative	negative	negative	negative	negative	negative	negative
9687TR9382	N	negative	negative	negative	negative	negative	negative	negative	negative
9697TR9396	N	negative	negative	negative	negative	positive	negative	negative	negative
9703TR9407	N	negative	negative	negative	negative	positive	negative	negative	negative
9708TR9416	N	negative	negative	negative	negative	negative	negative	negative	negative
9709TR9417	N	negative	negative	negative	negative	negative	negative	negative	positive
9716TR9427	N	negative	negative	negative	negative	positive	negative	negative	negative
9725TR9444	A	negative	negative	negative	negative	negative	negative	negative	positive
9726TR9462	N	negative	negative	negative	negative	negative	negative	negative	negative
9732TR9450	A	negative	negative	negative	negative	negative	negative	negative	negative
9734TR9454	N	negative	negative	negative	negative	negative	negative	negative	negative
9735TR9455	N	negative	negative	negative	negative	negative	negative	negative	negative
9748TR4914b	N	negative	negative	negative	negative	negative	negative	negative	negative
9750TR9476	N	positive	negative	negative	negative	positive	negative	negative	negative
9752TR9583	N	negative	negative	negative	positive	negative	negative	negative	positive
9753TR9481	N	negative	negative	negative	negative	negative	negative	negative	negative
9765TR9496	N	negative	negative	negative	positive	negative	negative	negative	negative
9766TR9500	N	negative	negative	negative	negative	positive	negative	negative	negative
9769TR9502	N	negative	negative	negative	positive	negative	negative	negative	negative
9784TR9526	N	negative	negative	negative	negative	negative	negative	negative	negative
9790TR9531	A	negative	negative	negative	positive	negative	negative	negative	positive
9802TR9543	N	negative	negative	negative	negative	negative	negative	negative	negative
9813TR9565	N	negative	negative	negative	negative	positive	negative	negative	negative
9815TR9568	A	negative	negative	negative	negative	negative	negative	negative	negative
9834TR9639	N	negative	negative	negative	negative	negative	negative	positive	negative
9836TR9597	N	negative	negative	negative	negative	positive	negative	negative	negative
9840TR9599	N	negative	negative	negative	positive	negative	negative	negative	negative
9842TR9605	A	negative	negative	negative	negative	negative	negative	negative	negative
9844TR9608	A	negative	negative	negative	negative	negative	negative	negative	negative
9849TR9611	N	negative	negative	negative	negative	negative	negative	negative	negative
9855TR9619	A	negative	negative	negative	negative	negative	negative	negative	negative
9860TR7623a	N	negative	negative	negative	positive	negative	negative	negative	negative
9863TR9635	N	negative	negative	negative	negative	negative	negative	negative	negative
9866TR9637	N	negative	negative	negative	negative	negative	negative	negative	negative
9867TR9672	N	negative	negative	negative	negative	negative	negative	negative	negative
9869TR9642	N	negative	negative	negative	positive	negative	negative	negative	positive
9871TR0913b	N	negative	negative	negative	negative	negative	negative	negative	negative
9872TR9644	N	negative	negative	negative	negative	positive	negative	negative	negative
9883TR9658	N	negative	negative	negative	negative	positive	negative	negative	negative
9897TR9680	N	negative	negative	negative	negative	negative	negative	negative	negative
9909TR9695	N	negative	negative	negative	negative	negative	negative	negative	negative
9912TR9700	A	negative	negative	negative	negative	negative	negative	positive	negative
9913TR9751	N	negative	negative	negative	negative	positive	negative	negative	negative
9937TR9732	A	negative	negative	negative	positive	negative	positive	negative	positive
9938TR9733	N	negative	negative	negative	negative	negative	negative	negative	negative
9940TR9735	N	negative	negative	negative	negative	negative	negative	negative	negative
9942TR9739	N	negative	negative	negative	negative	negative	negative	negative	positive
9955TR9754	N	negative	negative	negative	negative	negative	negative	negative	negative
9956TR9756	N	negative	negative	negative	negative	negative	negative	negative	positive
9963TR9775	N	negative	negative	negative	positive	negative	negative	negative	negative
9965TR9778	N	negative	negative	negative	negative	positive	negative	negative	negative
9969TR9794	N	negative	negative	positive	negative	negative	negative	negative	positive
9971TR9786	N	negative	negative	negative	positive	negative	negative	negative	negative
9988TR9809	N	negative	negative	negative	negative	negative	negative	negative	negative
9999TR9820	N	negative	negative	negative	negative	negative	negative	negative	negative
a00fTR9842	N	negative	negative	negative	negative	negative	negative	negative	negative
a00tTR9860	N	negative	negative	negative	negative	negative	negative	negative	positive
a00wTR9858	A	negative	negative	negative	negative	negative	negative	negative	positive
a010TR9862	N	negative	negative	negative	positive	negative	negative	negative	negative
a01rTR9890	A	positive	negative	negative	negative	negative	negative	negative	negative
a01xTR9899	N	negative	negative	negative	negative	negative	negative	negative	negative
a022TR9901	N	negative	negative	negative	negative	negative	negative	negative	negative
a029TR9909	N	negative	negative	negative	positive	negative	negative	negative	negative
a02dTR9915	N	negative	negative	negative	negative	negative	negative	negative	negative
a02kTR9925	N	negative	negative	negative	negative	positive	negative	negative	negative
a02wTR9937	N	negative	negative	negative	negative	positive	negative	negative	negative
a03aTR9951	N	negative	negative	negative	negative	negative	negative	negative	negative
a03eTR6245a	N	negative	negative	negative	negative	positive	negative	negative	positive
a03mTR9955	N	negative	negative	negative	negative	negative	negative	negative	negative
a046TR9963	A	negative	negative	negative	negative	negative	negative	negative	positive
a04hTR9975	N	negative	negative	negative	negative	negative	negative	negative	positive
a04mTR9979	A	negative	negative	negative	negative	negative	negative	negative	negative
a04tTR9984	N	negative	negative	negative	negative	negative	negative	negative	negative
a052TR9992	A	negative	negative	negative	negative	negative	negative	negative	negative
a05fTR0003a	A	negative	negative	negative	negative	positive	negative	negative	positive
a05kTR0007a	N	negative	negative	negative	negative	negative	negative	negative	negative
a05pTR0009a	N	negative	negative	negative	negative	positive	negative	negative	negative
a05xTR5759a	N	negative	negative	negative	negative	negative	negative	negative	positive
a060TR0016a	N	negative	negative	negative	negative	negative	negative	negative	positive
a063TR0021a	N	negative	negative	negative	negative	negative	positive	negative	positive
a066TR0028a	N	negative	negative	negative	negative	positive	positive	negative	positive
a06eTR0037a	N	negative	negative	negative	negative	negative	negative	negative	positive
a06kTR0042a	N	negative	negative	negative	negative	negative	negative	negative	negative
a06nTR0048a	N	negative	negative	negative	negative	negative	negative	negative	positive
a06tTR0050a	N	negative	negative	negative	negative	negative	negative	negative	negative
a06wTR0051a	N	negative	negative	negative	negative	negative	negative	negative	negative
a072TR0057a	N	negative	negative	negative	positive	negative	negative	negative	positive
a07pTR0086a	N	negative	negative	negative	negative	negative	negative	negative	negative
a086TR8183a	N	negative	negative	negative	negative	positive	negative	negative	negative
a087TR0100a	A	negative	negative	negative	negative	negative	negative	negative	negative
a08dTR0104a	A	negative	negative	negative	negative	negative	negative	positive	negative
a08hTR0108a	N	negative	negative	negative	negative	negative	negative	negative	negative
a08nTR0110a	A	negative	negative	negative	negative	positive	negative	negative	negative
a08rTR0115a	A	negative	negative	negative	negative	positive	negative	negative	negative
a08wTR0116a	N	negative	negative	negative	negative	negative	negative	negative	positive
a08xTR0117a	N	negative	negative	negative	positive	negative	negative	negative	negative
a09cTR0126a	N	negative	negative	negative	negative	negative	negative	negative	negative
a09dTR0128a	N	negative	negative	negative	negative	negative	negative	negative	negative
a09fTR0129a	N	negative	negative	negative	positive	negative	negative	negative	negative
a09rTR0139a	N	negative	negative	negative	negative	negative	negative	negative	negative
a0a8TR0173a	N	negative	negative	negative	negative	negative	negative	negative	negative
a0aaTR0176a	N	negative	negative	negative	negative	negative	negative	negative	negative
a0amTR0189a	A	negative	negative	negative	negative	negative	negative	negative	positive
a0cxTR0234a	N	negative	negative	negative	negative	negative	negative	negative	negative
a0d8TR0243a	N	negative	negative	negative	negative	negative	negative	negative	negative
a0d9TR0706b	A	negative	negative	negative	negative	negative	negative	negative	negative
a0dcTR0247a	N	negative	negative	positive	negative	negative	positive	negative	positive
a0dkTR0262a	N	negative	negative	negative	negative	negative	negative	negative	negative
a0dwTR0269a	N	negative	negative	positive	negative	negative	negative	negative	negative
a0e9TR9814a	A	negative	negative	negative	negative	positive	negative	negative	negative
a0eaTR0286a	A	negative	negative	negative	negative	negative	negative	negative	negative
a0ecTR0287a	N	negative	negative	negative	negative	positive	negative	negative	negative
a0efTR0291a	N	negative	negative	negative	negative	negative	negative	negative	negative
a0ejTR0293a	N	negative	negative	negative	positive	negative	positive	negative	negative
a0emTR0295a	A	negative	negative	negative	negative	negative	negative	negative	positive
a0epTR0300a	N	negative	negative	negative	negative	negative	negative	negative	negative
a0exTR0305a	A	negative	negative	negative	positive	negative	negative	negative	negative
a0fhTR0327a	N	negative	positive	negative	negative	negative	negative	negative	negative
a0fkTR4942b	N	negative	negative	negative	negative	negative	negative	negative	positive
a0fnTR0332a	N	negative	negative	negative	positive	negative	negative	negative	negative
a0fxTR0341a	N	negative	negative	negative	negative	negative	negative	negative	negative
a0h5TR9919a	A	negative	negative	negative	negative	negative	negative	negative	negative
a0h9TR0358a	A	negative	negative	negative	negative	negative	negative	positive	negative
a0hkTR0374a	A	negative	negative	negative	negative	negative	negative	negative	negative
a0hnTR0377a	N	negative	negative	negative	negative	negative	negative	negative	negative
a0j2TR0392a	N	negative	negative	negative	negative	negative	negative	negative	negative
a0j3TR0394a	N	negative	negative	negative	negative	negative	negative	negative	negative
a0j4TR0398a	N	negative	negative	negative	positive	negative	negative	negative	positive
a0j6TR0395a	N	negative	negative	negative	negative	negative	negative	negative	negative
a0jcTR0402a	N	negative	negative	negative	negative	negative	negative	negative	positive
a0jdTR0404a	N	negative	negative	negative	negative	positive	negative	negative	negative
a0jeTR0405a	N	negative	negative	negative	negative	negative	positive	negative	negative
a0jjTR0408a	N	negative	negative	negative	negative	negative	negative	negative	positive
a0jkTR0410a	N	negative	negative	negative	positive	positive	negative	negative	negative
a0jnTR0413a	N	negative	negative	negative	negative	negative	negative	negative	negative
a0k7TR0426a	A	negative	negative	negative	negative	negative	negative	negative	negative
a0kfTR0441a	N	negative	negative	negative	negative	positive	negative	positive	positive
a0kkTR0444a	A	negative	negative	negative	negative	negative	negative	negative	negative
a0m3TR0459a	N	negative	negative	negative	negative	negative	negative	negative	positive
a0mcTR0480a	N	negative	negative	negative	negative	positive	negative	negative	negative
a0mxTR0482a	N	negative	negative	negative	negative	negative	negative	negative	negative
a0n6TR0503a	N	negative	negative	negative	positive	negative	negative	negative	negative
a0n7TR0506a	N	negative	negative	negative	negative	negative	negative	negative	negative
a0ndTR0528a	A	negative	negative	negative	negative	negative	negative	negative	negative
a0nfTR0529a	N	negative	negative	negative	negative	negative	negative	negative	negative
a0nmTR0536a	N	negative	negative	negative	negative	negative	negative	negative	negative
a0p3TR0547a	N	positive	negative	negative	negative	negative	negative	negative	negative
a0p4TR0549a	N	negative	negative	negative	negative	negative	negative	negative	negative
a0p5TR0551a	N	negative	negative	negative	negative	positive	negative	negative	negative
a0ptTR0581a	N	negative	negative	negative	positive	negative	negative	negative	negative
a0r1TR0591a	A	negative	negative	negative	negative	positive	negative	negative	negative
a0r4TR0598a	N	negative	negative	negative	negative	negative	positive	negative	negative
a0raTR0612a	N	negative	negative	negative	negative	negative	negative	negative	negative
a0rcTR0609a	N	negative	negative	negative	negative	negative	negative	negative	negative
a0rdTR0606a	N	negative	negative	negative	negative	negative	negative	negative	negative
a0rfTR0604a	N	negative	negative	negative	negative	positive	negative	negative	negative
a0t7TR0627a	N	negative	negative	negative	positive	negative	negative	negative	negative
a0taTR0633a	N	negative	negative	negative	negative	negative	negative	negative	negative
a0tmTR0645a	N	negative	negative	negative	positive	negative	negative	negative	negative
a0w9TR0665a	N	negative	negative	negative	negative	negative	negative	negative	negative
a0wjTR0678a	A	negative	negative	negative	negative	negative	negative	negative	negative
a0wnTR0682a	A	negative	negative	negative	positive	negative	positive	negative	positive
a0x7TR0695a	N	negative	negative	negative	positive	negative	negative	negative	negative
a0xhTR0704a	N	negative	positive	negative	negative	negative	negative	negative	negative
a0xnTR0711a	N	negative	negative	negative	negative	negative	negative	negative	negative
a0xpTR0713a	N	negative	negative	negative	negative	negative	negative	negative	negative
a0xxTR0720a	N	negative	negative	negative	negative	negative	negative	negative	negative
a104TR0724a	N	negative	negative	negative	negative	negative	negative	negative	negative
a105TR0725a	A	negative	negative	negative	negative	negative	negative	negative	negative
a107TR0726a	N	negative	negative	negative	negative	negative	positive	negative	negative
a10mTR0741a	N	negative	negative	negative	negative	positive	negative	negative	negative
a10xTR0749a	N	negative	negative	negative	negative	negative	negative	negative	negative
a111TR0752a	N	negative	negative	negative	positive	negative	negative	negative	negative
a116TR0760a	N	negative	negative	negative	positive	negative	negative	negative	negative
a119TR0763a	N	negative	negative	negative	negative	positive	negative	negative	negative
a11aTR0764a	N	negative	negative	negative	positive	negative	negative	negative	negative
a11cTR0767a	N	negative	negative	negative	negative	positive	negative	negative	negative
a121TR0782a	N	negative	negative	negative	negative	negative	negative	negative	negative
a123TR0784a	N	negative	negative	negative	positive	negative	negative	negative	negative
a128TR0791a	N	negative	negative	negative	positive	negative	negative	negative	negative
a12eTR0794a	N	negative	negative	negative	negative	negative	negative	negative	negative
a12nTR0802a	N	negative	negative	negative	negative	positive	positive	negative	positive
a132TR0813a	N	negative	negative	negative	negative	positive	negative	negative	negative
a13hTR0829a	N	negative	negative	negative	negative	negative	negative	negative	negative
a13kTR0837a	N	negative	negative	negative	negative	positive	negative	positive	positive
a13mTR0834a	N	negative	negative	negative	positive	negative	negative	negative	negative
a13nTR6828a	A	negative	negative	negative	negative	negative	negative	negative	negative
a13pTR0838a	N	negative	negative	negative	negative	negative	negative	negative	negative
a13rTR0840a	N	negative	negative	negative	negative	positive	negative	negative	negative
a13xTR0845a	A	negative	negative	negative	negative	positive	negative	negative	negative
a142TR0849a	A	positive	negative	negative	positive	negative	negative	negative	negative
a143TR0848a	A	negative	negative	positive	positive	negative	positive	negative	negative
a148TR0854a	N	negative	negative	negative	negative	positive	negative	negative	negative
a14dTR0858a	N	negative	negative	negative	positive	negative	negative	negative	negative
a14fTR0862a	A	negative	negative	negative	negative	negative	negative	positive	negative
a14nTR0866a	N	negative	negative	negative	negative	negative	negative	negative	positive
a14pTR0869a	N	positive	negative	negative	negative	negative	negative	negative	negative
a14xTR0874a	N	negative	negative	negative	positive	negative	negative	negative	negative
a150TR0875a	A	negative	negative	negative	negative	positive	positive	positive	positive
a15cTR0885a	N	negative	negative	negative	negative	negative	negative	negative	positive
a15nTR0894a	A	negative	negative	negative	negative	negative	negative	negative	negative
a15pTR0897a	A	negative	negative	negative	positive	negative	negative	negative	positive
a15wTR0902a	N	negative	negative	negative	negative	positive	negative	negative	negative
a16kTR0937a	N	negative	negative	negative	positive	negative	negative	negative	negative
a16mTR0938a	A	negative	negative	negative	positive	positive	negative	negative	negative
a16pTR0940a	N	negative	negative	negative	positive	negative	negative	negative	negative
a172TR0963a	N	negative	negative	negative	positive	negative	negative	negative	negative
a180TR0984a	N	negative	negative	negative	positive	positive	negative	negative	negative
a182TR0986a	N	negative	negative	negative	negative	negative	negative	negative	negative
a185TR0993a	N	negative	negative	negative	positive	positive	negative	negative	negative
a18eTR1004a	N	negative	negative	negative	negative	negative	negative	negative	negative
a18mTR1010a	N	negative	negative	negative	positive	positive	negative	negative	negative
a18pTR1012a	N	negative	negative	negative	positive	negative	negative	negative	positive
a18rTR1013a	N	negative	negative	negative	positive	negative	positive	negative	negative
a190TR1018a	N	negative	negative	negative	positive	negative	negative	positive	negative
a191TR1019a	N	negative	negative	negative	negative	negative	negative	negative	negative
a195TR1025a	N	negative	negative	negative	positive	negative	negative	negative	positive
a19kTR1039a	A	negative	negative	negative	positive	negative	negative	negative	negative
a1a9TR1060a	A	negative	negative	negative	negative	positive	negative	negative	negative
a1axTR1087a	N	negative	negative	negative	negative	negative	negative	negative	negative
a1c1TR1090a	N	negative	negative	negative	negative	positive	negative	negative	negative
a1c2TR1173a	A	negative	negative	negative	negative	negative	negative	negative	negative
a1c8TR1108a	N	negative	negative	negative	negative	negative	negative	negative	positive
a1cjTR1115a	N	negative	negative	negative	negative	negative	negative	negative	negative
a1d2TR1125a	A	negative	negative	negative	negative	negative	negative	negative	negative
a1d4TR1131a	N	negative	negative	negative	negative	negative	negative	negative	negative
a1d7TR1132a	N	negative	negative	negative	negative	positive	negative	negative	negative
a1dcTR1138a	A	negative	negative	negative	negative	negative	negative	negative	positive
a1ddTR1143a	A	negative	negative	negative	negative	negative	negative	negative	positive
a1deTR1141a	N	negative	negative	negative	negative	negative	negative	negative	negative
a1dxTR1156a	N	negative	negative	negative	negative	negative	negative	negative	negative
a1ekTR1182a	N	negative	negative	negative	negative	negative	negative	negative	negative
a1f9TR1209a	A	negative	negative	negative	negative	negative	negative	negative	negative
a1haTR1242a	A	negative	negative	negative	negative	negative	negative	negative	negative
a1hdTR1245a	N	negative	negative	negative	negative	negative	negative	negative	negative
a1hkTR1247a	A	negative	negative	negative	negative	negative	positive	negative	negative
a1hrTR1255a	N	negative	negative	negative	negative	negative	negative	negative	positive
a1hxTR1260a	N	negative	negative	negative	positive	negative	positive	negative	positive
a1j5TR1262a	A	negative	negative	negative	negative	negative	negative	negative	positive
a1j9TR1268a	N	negative	positive	negative	negative	positive	negative	positive	positive
a1jeTR1274a	N	negative	negative	negative	negative	positive	negative	negative	positive
a1jhTR1282a	N	negative	negative	negative	negative	negative	negative	negative	negative
a1jrTR1287a	N	negative	negative	negative	positive	negative	negative	negative	negative
a1k9TR1303a	N	negative	negative	negative	negative	negative	negative	negative	positive
a1knTR1319a	N	negative	negative	positive	negative	positive	negative	positive	positive
a1kpTR1318a	N	negative	negative	negative	negative	positive	negative	negative	negative
a1krTR1320a	A	negative	negative	negative	negative	negative	negative	negative	negative
a1m2TR1329a	N	negative	negative	negative	positive	negative	positive	negative	negative
a1m4TR1328a	N	negative	negative	negative	negative	positive	negative	negative	negative
a1n4TR1362a	N	negative	negative	negative	negative	negative	negative	negative	negative
a1n7TR1366a	N	negative	negative	negative	negative	positive	negative	negative	negative
a1p0TR1394a	A	negative	negative	negative	positive	negative	positive	negative	negative
a1p9TR1423a	N	negative	negative	negative	negative	negative	negative	negative	negative
a1pfTR1415a	N	negative	negative	negative	positive	negative	negative	negative	negative
a1phTR1416a	A	positive	negative	negative	negative	positive	negative	negative	negative
a1ppTR1424a	N	negative	negative	negative	negative	negative	negative	negative	negative
a1ptTR1427a	N	negative	negative	negative	negative	negative	negative	negative	negative
a1rkTR1455a	A	negative	negative	negative	positive	negative	negative	negative	negative
a1t2TR1467a	N	negative	negative	negative	negative	negative	negative	negative	negative
a1tcTR1480a	A	negative	negative	negative	negative	negative	negative	negative	negative
a1teTR1481a	A	negative	negative	negative	negative	positive	negative	negative	negative
a1w0TR1490a	A	negative	negative	negative	negative	negative	negative	negative	positive
a1w5TR1500a	A	negative	negative	negative	negative	positive	positive	positive	positive
a1w7TR1506a	N	negative	negative	negative	negative	positive	negative	negative	negative
a1w8TR1507a	N	negative	negative	negative	positive	positive	negative	negative	positive
a1wfTR1515a	A	negative	negative	negative	positive	negative	negative	negative	negative
a1wrTR1525a	N	negative	negative	negative	negative	positive	negative	negative	negative
a1xaTR1542a	A	negative	negative	negative	negative	negative	negative	negative	negative
a1xcTR1543a	A	negative	negative	negative	positive	negative	negative	negative	positive
a1xdTR1545a	A	negative	negative	negative	positive	negative	negative	negative	negative
a1xfTR1546a	N	negative	negative	negative	negative	negative	negative	negative	positive
a1xjTR1548a	N	negative	negative	negative	positive	negative	negative	negative	negative
a200TR1562a	N	negative	negative	negative	positive	negative	negative	negative	positive
a203TR1564a	N	negative	negative	negative	positive	negative	negative	negative	negative
a20kTR1588a	N	negative	negative	negative	negative	negative	negative	negative	negative
a212TR1597a	N	negative	negative	negative	negative	negative	negative	negative	negative
a214TR1614a	N	negative	negative	negative	positive	negative	negative	negative	negative
a21aTR1604a	N	negative	negative	negative	positive	negative	negative	negative	negative
a21eTR1609a	A	negative	negative	negative	positive	negative	negative	negative	negative
a221TR1630a	N	negative	negative	negative	negative	positive	negative	negative	negative
a22aTR1646a	A	negative	negative	negative	negative	positive	negative	negative	negative
a22hTR1661a	A	negative	negative	negative	negative	negative	negative	negative	positive
a22pTR3332a	N	negative	negative	negative	negative	positive	negative	negative	positive
a230TR1668a	N	negative	negative	negative	negative	negative	negative	positive	negative
a231TR1669a	N	negative	negative	negative	negative	negative	negative	negative	positive
a233TR1671a	A	negative	negative	negative	positive	negative	negative	negative	positive
a239TR1676a	N	negative	negative	negative	positive	positive	negative	negative	negative
a23hTR1684a	N	negative	negative	negative	positive	negative	positive	negative	negative
a24mTR1715a	A	negative	negative	negative	positive	negative	negative	negative	negative
a24pTR1720a	N	negative	negative	negative	positive	negative	negative	negative	negative
a257TR1731a	A	negative	negative	negative	negative	positive	negative	negative	positive
a258TR1730a	N	negative	negative	positive	positive	positive	negative	negative	negative
a259TR1733a	N	negative	negative	negative	negative	negative	negative	negative	negative
a25cTR1735a	N	negative	negative	negative	negative	negative	negative	negative	negative
a25wTR1748a	N	negative	negative	negative	negative	positive	negative	negative	negative
a267TR1759a	N	negative	negative	negative	positive	positive	negative	negative	positive
a26fTR1777a	N	negative	negative	negative	negative	positive	negative	negative	negative
a26hTR1772a	N	negative	negative	negative	negative	negative	negative	positive	negative
a26jTR1774a	N	negative	negative	negative	negative	positive	negative	negative	negative
a26nTR1781a	N	negative	negative	negative	negative	negative	negative	negative	negative
a26pTR1782a	N	negative	negative	positive	positive	positive	negative	negative	positive
a271TR0431b	N	negative	negative	negative	negative	negative	negative	negative	positive
a275TR1793a	N	negative	negative	negative	negative	negative	negative	negative	negative
a276TR1799a	N	negative	negative	negative	negative	negative	negative	negative	positive
a278TR9958a	N	positive	negative	negative	negative	negative	negative	negative	negative
a27wTR1821a	A	negative	negative	negative	negative	negative	negative	negative	positive
a296TR1858a	N	negative	negative	negative	negative	negative	negative	negative	negative
a298TR1862a	N	negative	negative	negative	negative	positive	negative	negative	negative
a29mTR1875a	N	negative	negative	negative	negative	negative	negative	negative	positive
a29rTR1879a	N	negative	negative	negative	negative	negative	negative	positive	positive
a2a9TR1893a	A	negative	negative	negative	negative	negative	negative	negative	negative
a2ahTR1900a	N	negative	negative	negative	negative	positive	negative	negative	negative
a2ajTR1901a	N	negative	negative	negative	positive	negative	positive	negative	negative
a2c6TR1919a	N	negative	negative	negative	negative	negative	negative	negative	negative
a2cjTR1932a	N	negative	negative	negative	negative	negative	negative	negative	negative
a2crTR1642b	N	negative	negative	negative	negative	positive	negative	negative	negative
a2d2TR1951a	N	negative	negative	negative	positive	negative	negative	negative	negative
a2d3TR1997a	N	positive	negative	positive	negative	negative	positive	positive	positive
a2d5TR1953a	N	negative	negative	negative	negative	negative	negative	negative	negative
a2d6TR1952a	N	negative	positive	negative	negative	negative	negative	negative	negative
a2d7TR1955a	A	negative	negative	negative	positive	negative	negative	negative	positive
a2d8TR1962a	N	negative	negative	negative	negative	negative	negative	negative	negative
a2dcTR1959a	N	negative	negative	negative	negative	negative	negative	negative	positive
a2deTR1960a	N	negative	negative	negative	negative	negative	negative	negative	negative
a2dmTR1970a	A	negative	negative	negative	negative	negative	negative	negative	negative
a2drTR1968a	N	negative	negative	negative	positive	negative	negative	negative	positive
a2dxTR1973a	N	negative	negative	negative	positive	negative	positive	negative	positive
a2e4TR1978a	N	negative	negative	negative	negative	negative	negative	negative	negative
a2e7TR1981a	N	negative	negative	negative	negative	negative	negative	negative	positive
a2e8TR1983a	N	negative	negative	negative	positive	negative	negative	negative	negative
a2edTR1988a	N	negative	negative	negative	positive	negative	negative	negative	negative
a2ehTR8292a	N	negative	negative	negative	negative	positive	negative	negative	negative
a2f3TR2019a	N	negative	negative	negative	positive	negative	negative	negative	negative
a2f7TR2028a	A	negative	negative	negative	negative	negative	negative	negative	negative
a2fcTR2033a	N	negative	negative	negative	negative	negative	negative	negative	negative
a2h5TR2054a	N	negative	negative	negative	negative	negative	negative	positive	positive
a2h7TR2058a	N	negative	negative	negative	negative	negative	negative	negative	negative
a2jtTR2116a	N	negative	negative	negative	positive	negative	negative	negative	negative
a2k0TR2122a	N	negative	negative	negative	negative	negative	negative	negative	negative
a2k9TR2138a	N	negative	negative	negative	negative	negative	negative	negative	negative
a2krTR2157a	N	negative	negative	negative	negative	positive	positive	negative	negative
a2m0TR2160a	A	negative	negative	negative	negative	negative	negative	negative	positive
a2m5TR2165a	A	negative	positive	negative	negative	negative	negative	negative	negative
a2m9TR2170a	N	negative	negative	negative	negative	negative	negative	negative	negative
a2nkTR2217a	N	negative	negative	negative	negative	negative	negative	negative	negative
a2p2TR6261b	N	negative	negative	negative	negative	negative	negative	negative	negative
a2pmTR2267a	A	positive	negative	negative	negative	negative	negative	negative	negative
a2pwTR2272a	A	negative	negative	negative	negative	negative	negative	negative	negative
a2t7TR1257b	N	positive	positive	negative	positive	negative	negative	negative	negative
a2tcTR2323a	A	negative	negative	negative	positive	negative	negative	negative	negative
a2thTR2328a	N	negative	negative	negative	negative	negative	negative	negative	negative
a2tkTR2331a	N	negative	negative	negative	negative	negative	negative	negative	negative
a2ttTR2341a	N	negative	negative	negative	negative	negative	negative	negative	negative
a2w0TR2344a	N	negative	negative	negative	positive	negative	negative	negative	negative
a2w3TR2348a	N	negative	negative	negative	negative	negative	negative	negative	negative
a2xhTR2396a	N	negative	negative	negative	negative	negative	negative	negative	negative
a2xrTR2405a	A	negative	negative	negative	negative	negative	negative	negative	negative
a300TR2411a	A	negative	negative	negative	negative	negative	negative	negative	negative
a302TR2414a	N	negative	negative	negative	negative	negative	negative	negative	negative
a304TR1187b	N	negative	negative	negative	negative	negative	negative	negative	negative
a305TR2419a	N	negative	negative	negative	negative	negative	negative	negative	positive
a309TR2428a	N	negative	negative	negative	positive	negative	negative	negative	negative
a30aTR2430a	N	negative	negative	negative	negative	negative	positive	negative	positive
a30rTR2442a	N	negative	negative	negative	negative	negative	negative	negative	negative
a310TR2451a	N	negative	negative	negative	negative	negative	negative	negative	negative
a31eTR2467a	N	negative	negative	negative	negative	positive	negative	negative	negative
a31fTR7782a	N	negative	negative	negative	positive	negative	negative	negative	negative
a327TR2496a	N	negative	negative	negative	positive	negative	negative	negative	negative
a32mTR2505a	A	negative	negative	negative	negative	negative	negative	negative	positive
a32pTR2508a	N	negative	negative	negative	negative	negative	negative	negative	negative
a333TR2517a	N	negative	negative	negative	negative	negative	negative	negative	negative
a335TR2518a	N	negative	negative	negative	positive	negative	negative	negative	negative
a33kTR2535a	N	negative	negative	negative	negative	positive	positive	negative	positive
a33mTR2538a	N	negative	negative	negative	negative	negative	negative	negative	positive
a33pTR8509a	N	negative	negative	negative	negative	negative	negative	negative	negative
a33rTR2541a	N	negative	negative	negative	positive	negative	negative	negative	negative
a33tTR2543a	A	negative	negative	negative	positive	positive	positive	negative	negative
a34eTR2562a	N	negative	negative	negative	negative	negative	negative	negative	negative
a34kTR2564a	N	negative	negative	negative	negative	negative	negative	negative	negative
a34nTR2568a	A	negative	negative	negative	negative	positive	negative	negative	negative
a34wTR2574a	N	negative	negative	negative	negative	negative	negative	negative	negative
a359TR2583a	N	negative	negative	negative	negative	positive	negative	negative	negative
a368TR2617a	N	negative	negative	negative	negative	negative	negative	negative	positive
a36jTR2625a	N	negative	negative	negative	positive	negative	negative	negative	positive
a36mTR2627a	N	negative	negative	negative	negative	negative	negative	negative	negative
a36nTR2629a	N	negative	negative	negative	negative	negative	negative	negative	negative
a377TR2641a	A	negative	positive	negative	negative	negative	negative	negative	negative
a379TR2642a	N	negative	negative	negative	negative	negative	positive	negative	positive
a37wTR2659a	N	negative	negative	negative	negative	positive	negative	negative	negative
a382TR2662a	N	negative	negative	negative	negative	negative	negative	negative	negative
a38aTR2686a	N	negative	negative	negative	negative	negative	negative	negative	negative
a38rTR2691a	N	negative	negative	negative	positive	negative	positive	negative	positive
a390TR2695a	N	negative	negative	negative	negative	positive	negative	negative	negative
a395TR2702a	N	negative	negative	negative	negative	negative	negative	negative	positive
a39aTR2716a	N	negative	negative	negative	negative	negative	negative	negative	positive
a39jTR2719a	N	negative	negative	negative	positive	positive	negative	negative	negative
a39xTR2725a	N	negative	negative	negative	negative	negative	negative	negative	negative
a3a8TR2745a	A	negative	negative	negative	positive	negative	negative	negative	positive
a3aaTR2747a	N	negative	negative	negative	negative	negative	negative	negative	negative
a3adTR2749a	N	negative	negative	negative	positive	negative	negative	negative	negative
a3atTR2759a	N	negative	negative	negative	negative	positive	negative	negative	negative
a3c1TR2767a	N	negative	negative	negative	negative	negative	negative	negative	negative
a3c6TR2773a	N	negative	negative	negative	negative	negative	negative	negative	negative
a3c8TR2775a	N	negative	negative	negative	negative	positive	negative	negative	negative
a3cfTR2779a	A	negative	negative	negative	negative	negative	negative	negative	negative
a3cwTR2797a	N	negative	negative	negative	negative	negative	negative	negative	negative
a3djTR2817a	N	negative	negative	negative	negative	negative	negative	negative	negative
a3e6TR2840a	N	negative	negative	negative	negative	negative	negative	negative	negative
a3e7TR2843a	N	negative	negative	negative	negative	negative	positive	negative	positive
a3e9TR2847a	A	negative	negative	negative	negative	positive	negative	positive	negative
a3ekTR2857a	N	negative	negative	negative	negative	positive	negative	negative	negative
a3exTR2863a	A	negative	negative	negative	positive	negative	negative	negative	positive
a3f9TR2874a	A	negative	negative	negative	positive	negative	positive	negative	negative
a3h3TR2898a	N	negative	negative	negative	negative	positive	negative	negative	negative
a3h6TR2900a	N	negative	negative	negative	negative	positive	negative	negative	positive
a3hdTR2903a	N	negative	negative	negative	negative	positive	negative	negative	negative
a3hmTR2911a	N	negative	negative	negative	negative	negative	negative	negative	negative
a3hwTR2918a	A	negative	negative	negative	positive	negative	negative	negative	negative
a3j1TR2920a	A	negative	negative	negative	negative	negative	negative	negative	positive
a3j9TR2928a	N	negative	negative	negative	positive	negative	negative	negative	positive
a3jjTR2938a	N	negative	negative	negative	negative	positive	negative	negative	positive
a3kfTR2995a	N	negative	negative	negative	negative	negative	negative	negative	negative
a3m6TR2983a	A	positive	negative	negative	negative	negative	negative	negative	negative
a3n1TR3008a	A	negative	negative	negative	positive	positive	negative	negative	negative
a3n6TR3015a	N	negative	negative	negative	positive	negative	negative	negative	negative
a3nnTR3023a	N	negative	negative	negative	negative	negative	negative	negative	negative
a3p7TR3061a	N	negative	negative	negative	negative	negative	positive	negative	positive
a3paTR3044a	N	negative	negative	negative	negative	negative	negative	negative	negative
a3pjTR3050a	N	negative	negative	negative	negative	positive	negative	negative	negative
a3pkTR3052a	N	negative	negative	negative	negative	negative	negative	negative	negative
a3r4TR3068a	A	negative	negative	negative	negative	negative	negative	negative	negative
a3rdTR3077a	N	negative	negative	positive	negative	positive	negative	negative	positive
a3rhTR3084a	A	negative	negative	negative	negative	negative	positive	positive	negative
a3rnTR3089a	N	negative	negative	negative	negative	negative	negative	negative	negative
a3rpTR3090a	N	negative	negative	negative	negative	negative	negative	negative	negative
a3rrTR3091a	N	negative	negative	negative	negative	negative	negative	negative	negative
a3rxTR3092a	N	negative	negative	negative	negative	negative	negative	negative	negative
a3t9TR3105a	N	negative	negative	negative	negative	negative	negative	negative	negative
a3thTR3111a	N	negative	negative	negative	negative	positive	negative	negative	negative
a3twTR1300b	N	negative	negative	negative	negative	negative	positive	negative	negative
a3txTR3119a	N	negative	negative	negative	negative	negative	negative	negative	negative
a3w4TR3116a	A	negative	negative	negative	negative	negative	negative	negative	negative
a3w6TR3127a	N	negative	negative	negative	negative	positive	negative	negative	negative
a3wjTR3138a	N	negative	negative	negative	positive	negative	negative	negative	negative
a3wmTR3142a	N	negative	negative	negative	negative	negative	negative	negative	negative
a3wnTR3147a	N	negative	negative	negative	negative	positive	negative	negative	negative
a3wpTR3148a	N	negative	negative	negative	negative	negative	positive	negative	positive
a3x3TR3183a	N	negative	negative	negative	negative	positive	negative	negative	negative
a3x7TR3173a	N	negative	negative	negative	negative	positive	negative	positive	negative
a3x9TR3184a	N	negative	negative	negative	negative	negative	negative	negative	negative
a403TR3197a	A	negative	negative	negative	negative	negative	negative	negative	negative
a408TR3204a	A	negative	negative	negative	negative	negative	positive	negative	negative
a40aTR3208a	N	negative	negative	negative	positive	negative	negative	negative	negative
a40fTR3211a	N	negative	negative	negative	negative	positive	positive	negative	positive
a40kTR3212a	N	negative	negative	negative	negative	negative	negative	negative	negative
a40nTR3220a	N	negative	negative	negative	negative	negative	negative	negative	negative
a412TR3227a	N	negative	negative	negative	negative	negative	negative	negative	negative
a418TR3231a	N	negative	negative	negative	negative	negative	negative	negative	negative
a41nTR3242a	N	negative	negative	negative	negative	negative	negative	negative	negative
a421TR3248a	A	negative	negative	negative	negative	negative	negative	negative	positive
a42cTR3266a	A	negative	negative	negative	positive	negative	negative	negative	negative
a435TR3297a	N	negative	negative	negative	negative	negative	negative	negative	negative
a43dTR3303a	N	negative	negative	negative	negative	negative	negative	negative	negative
a43eTR3304a	N	negative	negative	negative	negative	negative	negative	negative	negative
a43fTR3305a	N	negative	negative	negative	negative	positive	negative	negative	negative
a43jTR3356a	N	negative	negative	negative	negative	negative	negative	negative	negative
a448TR3320a	N	negative	negative	negative	negative	negative	negative	negative	negative
a44aTR3325a	N	negative	negative	negative	positive	negative	negative	negative	negative
a44hTR3333a	A	negative	negative	negative	negative	positive	negative	negative	negative
a44nTR3335a	N	negative	negative	negative	negative	positive	positive	negative	positive
a45xTR3383a	N	positive	negative	negative	negative	negative	negative	negative	negative
a461TR3388a	N	negative	negative	negative	negative	negative	negative	negative	negative
a46jTR3252a	N	negative	negative	negative	negative	negative	negative	negative	negative
a46mTR3411a	N	negative	negative	negative	negative	negative	negative	negative	negative
a477TR9509a	A	negative	negative	negative	negative	negative	negative	negative	negative
a479TR3453a	A	negative	negative	negative	negative	positive	negative	negative	negative
a47pTR3451a	N	negative	negative	negative	positive	negative	negative	negative	positive
a489TR3472a	N	negative	negative	negative	negative	negative	negative	negative	negative
a48pTR3487a	N	negative	negative	negative	negative	negative	negative	negative	negative
a49nTR3513a	N	negative	negative	negative	positive	positive	negative	negative	negative
a49xTR0878b	A	negative	negative	negative	negative	positive	negative	negative	positive
a4acTR3535a	N	negative	negative	negative	negative	negative	negative	negative	negative
a4anTR3546a	N	negative	negative	negative	negative	positive	negative	negative	negative
a4c1TR3553a	N	negative	negative	negative	negative	positive	negative	negative	positive
a4c2TR2483b	N	negative	negative	negative	negative	negative	negative	negative	negative
a4c3TR3556a	N	negative	negative	negative	positive	negative	negative	negative	negative
a4c4TR3557a	N	negative	negative	negative	negative	positive	negative	negative	negative
a4c5TR3559a	N	negative	negative	negative	negative	negative	negative	negative	negative
a4c6TR3560a	N	negative	negative	negative	negative	positive	negative	negative	positive
a4c9TR3567a	N	negative	negative	negative	negative	negative	negative	negative	negative
a4ddTR3613a	N	negative	negative	negative	negative	negative	negative	negative	negative
a4dfTR3616a	N	negative	negative	negative	negative	negative	negative	negative	negative
a4dpTR3629a	N	negative	negative	negative	negative	negative	positive	negative	positive
a4drTR3630a	N	negative	negative	negative	negative	negative	positive	negative	negative
a4dwTR3635a	N	negative	negative	negative	positive	negative	negative	negative	negative
a4dxTR9692a	N	negative	negative	negative	negative	negative	negative	negative	negative
a4e5TR3649a	N	negative	negative	negative	positive	negative	negative	negative	negative
a4f6TR3680a	N	negative	negative	negative	negative	negative	negative	negative	negative
a4feTR3690a	N	negative	negative	negative	negative	negative	negative	negative	positive
a4fhTR3692a	A	negative	negative	negative	negative	negative	negative	negative	negative
a4fwTR3702a	A	negative	negative	negative	negative	negative	positive	negative	negative
a4hnTR3728a	A	negative	negative	negative	negative	negative	negative	negative	negative
a4hwTR3777a	N	positive	negative	negative	negative	positive	negative	negative	negative
a4j0TR3734a	N	negative	negative	negative	positive	negative	negative	negative	negative
a4jfTR3760a	A	negative	negative	negative	negative	positive	negative	negative	negative
a4k3TR3773a	N	negative	negative	negative	negative	negative	negative	negative	negative
a4kpTR3791a	A	positive	negative	negative	negative	negative	negative	negative	negative
a4m0TR3794a	N	negative	negative	negative	negative	positive	negative	negative	negative
a4maTR3808a	N	negative	negative	negative	negative	negative	positive	negative	negative
a4meTR3811a	N	negative	negative	negative	negative	negative	negative	negative	positive
a4mjTR3814a	N	negative	negative	negative	negative	positive	negative	negative	negative
a4mwTR3824a	N	negative	negative	negative	positive	positive	negative	negative	negative
a4n7TR3833a	N	negative	negative	negative	negative	negative	negative	negative	negative
a4naTR3839a	N	negative	negative	negative	negative	negative	positive	negative	negative
a4ntTR3853a	A	negative	negative	negative	negative	negative	negative	negative	negative
a4pfTR4296b	A	negative	negative	negative	negative	negative	negative	negative	negative
a4pnTR3877a	A	negative	negative	negative	negative	negative	negative	negative	positive
a4r0TR3994a	N	negative	negative	negative	negative	negative	negative	negative	negative
a4r8TR3895a	A	negative	negative	positive	positive	negative	negative	negative	positive
a4rfTR3902a	N	negative	negative	negative	negative	negative	negative	negative	negative
a4t0TR3915a	A	positive	negative	negative	negative	negative	negative	negative	negative
a4t1TR3916a	N	negative	negative	negative	negative	positive	negative	negative	negative
a4t6TR3924a	N	negative	negative	negative	positive	negative	negative	negative	negative
a4tdTR3941a	N	negative	negative	negative	negative	negative	negative	negative	negative
a4tnTR3945a	A	negative	negative	negative	negative	negative	negative	negative	negative
a4wdTR3976a	N	negative	negative	negative	negative	negative	negative	negative	negative
a4weTR3975a	A	negative	negative	negative	negative	negative	negative	negative	negative
a4wmTR3983a	N	negative	negative	negative	negative	negative	negative	negative	negative
a4x2TR3998a	N	negative	negative	negative	negative	negative	positive	negative	positive
a4x3TR4001a	N	negative	negative	negative	negative	negative	negative	negative	negative
a4xfTR4059a	N	negative	negative	negative	positive	positive	negative	negative	positive
a4xjTR4024a	N	negative	negative	negative	negative	positive	negative	negative	negative
a50tTR4066a	N	negative	negative	negative	negative	negative	negative	positive	negative
a510TR4071a	N	negative	negative	negative	positive	negative	negative	negative	negative
a519TR4079a	N	negative	negative	negative	negative	negative	negative	negative	negative
a51cTR4086a	N	negative	negative	negative	negative	positive	negative	negative	negative
a51fTR4089a	N	negative	negative	negative	negative	negative	negative	negative	negative
a51kTR4092a	N	negative	negative	negative	negative	positive	negative	negative	positive
a51xTR4110a	N	negative	negative	negative	negative	negative	negative	negative	negative
a52cTR4120a	N	negative	negative	negative	negative	negative	negative	negative	negative
a52wTR4136a	N	negative	negative	negative	negative	positive	negative	negative	negative
a533TR4142a	A	negative	negative	negative	negative	negative	negative	negative	negative
a53mTR4154a	A	negative	negative	negative	positive	negative	negative	negative	positive
a545TR4168a	A	negative	negative	negative	negative	negative	negative	negative	positive
a54hTR4181a	N	negative	negative	negative	negative	positive	negative	negative	negative
a54wTR4190a	N	negative	negative	negative	negative	negative	negative	negative	negative
a55aTR4215a	A	negative	negative	negative	negative	negative	negative	negative	positive
a55dTR4220a	N	negative	negative	negative	negative	negative	negative	negative	negative
a55fTR4221a	N	negative	negative	negative	positive	negative	negative	negative	negative
a567TR4238a	N	negative	negative	negative	positive	negative	negative	negative	negative
a56nTR4251a	N	negative	negative	negative	negative	negative	negative	negative	negative
a56pTR4255a	N	negative	negative	negative	negative	positive	negative	negative	negative
a578TR4272a	N	negative	negative	negative	negative	negative	negative	negative	positive
a57aTR4273a	A	negative	negative	negative	negative	negative	negative	negative	positive
a57dTR4279a	N	negative	negative	negative	negative	negative	negative	negative	negative
a57hTR4287a	N	negative	negative	negative	negative	negative	negative	negative	positive
a57mTR4309a	A	negative	negative	negative	negative	negative	positive	negative	negative
a58aTR4330a	N	negative	negative	negative	negative	negative	negative	negative	negative
a58dTR4322a	N	negative	negative	negative	negative	negative	negative	negative	negative
a58hTR4325a	A	negative	negative	negative	negative	negative	negative	negative	negative
a594TR4338a	N	negative	negative	negative	positive	negative	positive	positive	negative
a5a4TR4362a	N	negative	negative	negative	negative	negative	negative	negative	negative
a5a5TR4363a	N	negative	negative	negative	negative	negative	negative	negative	negative
a5atTR4382a	N	negative	negative	negative	positive	negative	negative	negative	negative
a5awTR4383a	N	negative	negative	negative	negative	negative	negative	negative	negative
a5ccTR4398a	A	negative	negative	negative	positive	negative	negative	positive	positive
a5cmTR4404a	N	negative	negative	negative	negative	negative	negative	negative	negative
a5crTR4408a	N	negative	negative	negative	negative	positive	positive	negative	positive
a5d8TR2945b	N	negative	negative	negative	negative	positive	negative	negative	negative
a5dcTR4434a	A	negative	negative	negative	positive	negative	negative	positive	negative
a5djTR4435a	N	negative	negative	negative	negative	positive	negative	negative	negative
a5dnTR4438a	N	negative	negative	negative	negative	negative	negative	negative	negative
a5dxTR4442a	N	negative	negative	negative	negative	positive	negative	negative	negative
a5e1TR4445a	N	negative	negative	negative	negative	negative	negative	negative	negative
a5e4TR4449a	A	negative	negative	negative	negative	negative	negative	negative	negative
a5e6TR4455a	N	negative	negative	negative	negative	negative	negative	negative	negative
a5e9TR4460a	N	negative	negative	negative	negative	negative	negative	negative	negative
a5epTR4473a	N	negative	negative	negative	negative	positive	negative	negative	negative
a5f2TR4483a	N	negative	negative	negative	negative	negative	negative	negative	negative
a5f8TR4493a	N	negative	negative	negative	negative	negative	negative	negative	positive
a5faTR4495a	N	negative	negative	positive	negative	negative	negative	negative	positive
a5fcTR4501a	N	negative	negative	negative	negative	negative	negative	negative	negative
a5frTR4514a	N	negative	negative	negative	negative	positive	negative	negative	negative
a5h2TR4520a	A	negative	negative	negative	negative	negative	negative	negative	negative
a5h6TR4524a	N	negative	negative	negative	negative	positive	negative	negative	negative
a5jmTR4574a	N	negative	negative	negative	negative	positive	negative	negative	negative
a5jnTR4576a	N	negative	negative	negative	negative	negative	negative	negative	negative
a5jpTR4577a	N	negative	negative	negative	negative	negative	negative	negative	negative
a5jwTR4583a	A	negative	negative	negative	negative	negative	negative	negative	negative
a5k7TR4594a	N	negative	negative	negative	negative	negative	negative	negative	negative
a5k9TR4598a	N	negative	negative	negative	negative	negative	negative	negative	negative
a5kjTR4608a	N	negative	negative	negative	positive	negative	negative	negative	positive
a5kmTR4611a	N	negative	negative	negative	positive	negative	negative	negative	negative
a5kxTR4617a	N	negative	negative	negative	negative	positive	negative	positive	negative
a5m0TR4619a	N	negative	negative	negative	positive	negative	negative	negative	negative
a5m3TR4623a	N	negative	negative	negative	negative	negative	negative	negative	negative
a5m5TR4628a	A	negative	negative	negative	negative	negative	negative	negative	negative
a5m7TR4629a	N	negative	negative	negative	negative	negative	negative	negative	negative
a5m8TR4631a	N	negative	negative	negative	negative	negative	negative	negative	negative
a5mdTR4636a	N	negative	negative	negative	negative	negative	negative	negative	positive
a5n2TR4653a	A	negative	negative	negative	negative	negative	negative	negative	positive
a5n4TR4658a	N	negative	negative	negative	negative	negative	negative	negative	negative
a5pcTR4709a	N	negative	negative	negative	positive	negative	negative	negative	negative
a5r7TR4735a	N	negative	negative	negative	negative	positive	negative	negative	positive
a5rdTR4738a	N	negative	negative	negative	negative	negative	negative	negative	negative
a5rfTR4740a	A	negative	negative	negative	negative	negative	negative	negative	negative
a5rhTR4741a	N	negative	negative	negative	negative	negative	negative	negative	negative
a5rjTR4744a	N	negative	negative	negative	negative	positive	negative	negative	positive
a5rwTR4755a	A	negative	negative	negative	negative	negative	negative	negative	negative
a5t8TR7747a	N	negative	negative	negative	negative	negative	negative	negative	positive
a5t9TR4775a	N	negative	negative	negative	positive	negative	negative	positive	positive
a5tfTR4778a	N	negative	negative	negative	negative	negative	negative	negative	negative
a5txTR4792a	A	negative	negative	negative	positive	negative	positive	negative	positive
a5waTR4815a	A	negative	negative	negative	negative	negative	negative	negative	negative
a5wrTR4832a	A	negative	negative	negative	negative	negative	negative	negative	positive
a5wwTR4842a	N	negative	negative	negative	negative	negative	positive	negative	positive
a5xkTR4857a	N	negative	negative	negative	negative	negative	negative	negative	negative
a600TR4864a	N	negative	negative	negative	positive	negative	negative	negative	positive
a60cTR4877a	N	negative	negative	negative	negative	positive	positive	negative	positive
a60dTR4879a	A	negative	negative	negative	negative	negative	negative	negative	negative
a61tTR4927a	N	negative	negative	negative	negative	positive	negative	negative	negative
a61xTR4930a	A	negative	negative	negative	positive	negative	negative	negative	positive
a62hTR4958a	N	negative	negative	negative	negative	negative	negative	negative	negative
a633TR4975a	N	negative	negative	negative	negative	negative	negative	negative	positive
a635TR5528b	N	negative	negative	negative	negative	negative	negative	negative	negative
a639TR4988a	A	negative	positive	negative	positive	negative	negative	negative	negative
a63tTR5004a	A	negative	negative	negative	negative	negative	negative	negative	positive
a641TR9508a	N	negative	negative	negative	negative	negative	negative	negative	negative
a649TR5025a	N	negative	negative	negative	negative	negative	negative	negative	negative
a64eTR5028a	N	positive	negative	negative	negative	negative	negative	negative	negative
a64mTR5044a	N	negative	negative	negative	negative	negative	negative	negative	negative
a64rTR5039a	N	negative	negative	negative	negative	negative	negative	negative	negative
a656TR5053a	N	negative	negative	negative	negative	negative	negative	negative	negative
a657TR5062a	A	positive	negative	negative	negative	negative	negative	negative	negative
a65cTR5057a	N	negative	negative	negative	negative	negative	negative	negative	positive
a65eTR5060a	N	negative	negative	positive	positive	negative	positive	negative	negative
a66hTR5091a	A	negative	negative	negative	positive	positive	negative	negative	negative
a672TR5104a	N	negative	negative	negative	positive	negative	negative	negative	negative
a67nTR5115a	N	negative	negative	negative	negative	negative	negative	negative	negative
a68aTR5136a	N	negative	negative	negative	negative	negative	negative	negative	negative
a68eTR5142a	N	negative	negative	negative	negative	negative	negative	negative	negative
a695TR5167a	N	negative	negative	negative	negative	negative	negative	negative	negative
a696TR5168a	N	negative	negative	negative	negative	negative	negative	negative	negative
a69pTR5186a	N	negative	negative	negative	negative	positive	negative	negative	negative
a69wTR9152a	N	negative	negative	negative	positive	negative	positive	negative	positive
a6c3TR5230a	N	negative	negative	negative	negative	negative	negative	negative	negative
a6c7TR5232a	N	negative	negative	negative	positive	negative	negative	negative	negative
a6caTR5236a	N	negative	negative	negative	negative	negative	negative	negative	negative
a6ceTR5238a	N	negative	negative	negative	negative	negative	negative	negative	negative
a6ckTR5240a	N	negative	negative	negative	negative	negative	negative	negative	negative
a6dcTR5263a	N	positive	negative	negative	negative	negative	negative	negative	negative
a6dhTR5264a	A	negative	negative	negative	negative	negative	negative	negative	negative
a6e3TR5277a	A	positive	negative	negative	negative	positive	negative	negative	positive
a6ecTR5285a	N	negative	negative	negative	negative	negative	negative	negative	negative
a6efTR5283a	N	negative	negative	negative	negative	negative	positive	negative	negative
a6f0TR5295a	A	negative	negative	negative	negative	negative	negative	negative	negative
a6f5TR5306a	N	negative	negative	negative	negative	negative	negative	negative	negative
a6fmTR5331a	N	negative	negative	negative	negative	negative	negative	negative	negative
a6fwTR5393a	A	negative	negative	negative	negative	negative	positive	negative	negative
a6h1TR5348a	N	negative	negative	negative	negative	negative	negative	negative	negative
a6h7TR5353a	N	negative	negative	negative	negative	negative	negative	negative	negative
a6j3TR5390a	N	negative	negative	negative	negative	negative	positive	negative	negative
a6jaTR5400a	N	negative	negative	negative	negative	negative	negative	negative	negative
a6jhTR5405a	N	negative	negative	negative	negative	negative	negative	negative	negative
a6jjTR5410a	N	negative	negative	negative	negative	positive	negative	negative	negative
a6k5TR5434a	N	negative	negative	negative	negative	positive	negative	negative	positive
a6k7TR5436a	N	negative	negative	negative	negative	negative	negative	negative	negative
a6k9TR5437a	N	negative	negative	negative	negative	negative	negative	negative	negative
a6krTR5539a	N	negative	negative	negative	positive	negative	negative	negative	negative
a6kxTR5455a	N	negative	negative	negative	negative	negative	negative	negative	negative
a6m7TR5471a	N	negative	negative	negative	negative	positive	negative	negative	positive
a6mcTR5476a	N	negative	negative	negative	positive	positive	negative	negative	positive
a6meTR5480a	A	negative	negative	negative	positive	negative	negative	negative	negative
a6neTR5502a	N	negative	positive	negative	negative	positive	negative	negative	negative
a6nnTR5509a	N	negative	negative	negative	negative	positive	negative	negative	negative
a6p8TR5530a	N	negative	negative	negative	negative	negative	positive	negative	negative
a6r1TR5552a	N	negative	negative	negative	negative	negative	negative	negative	negative
a6rkTR5572a	A	negative	negative	negative	negative	negative	negative	negative	negative
a6rpTR5576a	N	negative	negative	negative	positive	negative	negative	negative	negative
a6rtTR5581a	N	negative	negative	negative	negative	negative	negative	negative	positive
a6rxTR5584a	N	negative	negative	negative	negative	negative	negative	negative	negative
a6t8TR5592a	A	negative	negative	negative	negative	negative	negative	negative	positive
a6tdTR5597a	A	negative	negative	negative	negative	negative	negative	negative	positive
a6tjTR5603a	N	negative	negative	negative	negative	negative	negative	negative	negative
a6trTR5615a	N	negative	negative	negative	negative	negative	negative	negative	positive
a6w3TR5622a	A	negative	negative	negative	positive	negative	negative	negative	negative
a6w4TR5624a	N	negative	negative	negative	negative	negative	positive	negative	negative
a6w8TR5633a	N	negative	negative	negative	negative	positive	negative	negative	negative
a6wdTR5637a	A	negative	negative	negative	negative	positive	negative	negative	positive
a6whTR5643a	N	negative	negative	negative	positive	negative	negative	negative	negative
a6wjTR5644a	A	negative	negative	negative	negative	negative	negative	negative	positive
a6wmTR5649a	N	negative	negative	negative	negative	negative	negative	negative	negative
a6wpTR5652a	N	negative	negative	negative	negative	negative	negative	negative	negative
a6wxTR5654a	N	negative	negative	negative	negative	negative	positive	positive	positive
a6x2TR5657a	N	negative	negative	negative	negative	negative	negative	negative	negative
a6x6TR5663a	N	negative	negative	negative	positive	negative	negative	negative	negative
a6xhTR5676a	N	negative	negative	negative	negative	negative	negative	negative	positive
a6xtTR5687a	N	negative	negative	negative	negative	negative	negative	negative	negative
a709TR5699a	N	negative	negative	negative	positive	negative	negative	negative	negative
a70fTR5709a	N	negative	negative	negative	negative	negative	negative	negative	positive
a70hTR5712a	N	negative	negative	negative	negative	negative	negative	negative	negative
a70tTR5722a	N	negative	negative	negative	positive	negative	negative	negative	negative
a715TR5733a	N	negative	negative	negative	negative	positive	negative	negative	positive
a722TR5768a	N	negative	negative	negative	positive	negative	negative	negative	negative
a72aTR5775a	N	negative	negative	negative	negative	negative	negative	negative	negative
a72jTR5782a	A	negative	negative	negative	negative	negative	negative	negative	negative
a72nTR5788a	N	negative	negative	negative	negative	negative	negative	positive	negative
a730TR5792a	N	negative	negative	negative	positive	negative	negative	negative	negative
a733TR5797a	N	negative	negative	negative	positive	negative	negative	negative	negative
a735TR5803a	N	negative	negative	negative	negative	positive	negative	negative	negative
a739TR5805a	A	negative	negative	negative	negative	negative	negative	positive	positive
a73hTR5812a	N	negative	negative	negative	negative	negative	negative	negative	negative
a743TR5826a	N	negative	negative	negative	negative	positive	negative	negative	negative
a748TR5831a	A	negative	negative	negative	negative	negative	negative	negative	negative
a74aTR5832a	N	negative	negative	negative	negative	negative	negative	negative	positive
a74jTR5846a	A	negative	negative	negative	negative	negative	positive	negative	positive
a74nTR5849a	A	negative	negative	negative	negative	positive	negative	negative	negative
a74rTR5851a	A	negative	negative	negative	positive	negative	negative	negative	negative
a75nTR5882a	N	negative	negative	negative	positive	negative	negative	negative	negative
a76nTR5908a	N	negative	negative	negative	negative	negative	negative	negative	negative
a76rTR5916a	A	negative	negative	negative	negative	negative	positive	negative	positive
a772TR5924a	A	positive	negative	negative	positive	negative	negative	negative	negative
a774TR5925a	A	positive	negative	negative	positive	negative	negative	negative	negative
a77pTR5938a	N	negative	negative	negative	negative	positive	negative	negative	positive
a78aTR5959a	N	negative	negative	negative	negative	negative	negative	negative	negative
a78cTR5960a	N	negative	negative	negative	negative	negative	negative	negative	negative
a78kTR5972a	N	negative	negative	negative	negative	positive	negative	negative	negative
a78pTR5977a	N	negative	negative	negative	negative	positive	negative	negative	positive
a790TR5985a	N	negative	negative	negative	positive	negative	negative	negative	negative
a792TR5990a	N	negative	negative	negative	positive	negative	negative	negative	negative
a79aTR5996a	N	positive	negative	negative	positive	negative	negative	negative	negative
a7c1TR6047a	N	negative	negative	negative	negative	negative	negative	negative	negative
a7c5TR6051a	A	positive	negative	negative	negative	negative	negative	negative	negative
a7caTR6057a	N	negative	negative	negative	positive	negative	negative	negative	negative
a7cmTR6064a	N	negative	negative	negative	negative	negative	negative	negative	negative
a7d9TR6092a	N	negative	negative	negative	negative	negative	negative	negative	negative
a7dkTR6099a	N	negative	negative	negative	negative	negative	negative	negative	negative
a7e8TR6118a	N	negative	negative	negative	positive	negative	negative	negative	negative
a7ecTR6134a	N	negative	negative	negative	positive	negative	negative	negative	negative
a7efTR6136a	N	negative	negative	negative	negative	negative	positive	negative	negative
a7ehTR6137a	N	negative	negative	negative	negative	negative	positive	negative	negative
a7epTR6144a	A	negative	negative	negative	positive	negative	negative	negative	negative
a7erTR6148a	A	negative	negative	negative	positive	negative	negative	negative	negative
a7f2TR6152a	A	negative	negative	negative	negative	negative	negative	negative	negative
a7fhTR6166a	A	negative	negative	negative	negative	negative	negative	negative	positive
a7h6TR6184a	A	negative	negative	negative	negative	negative	negative	negative	negative
a7h9TR6190a	A	negative	negative	negative	negative	negative	negative	negative	negative
a7hhTR6197a	N	negative	negative	negative	negative	negative	negative	negative	negative
a7j0TR6210a	A	positive	negative	negative	positive	negative	negative	negative	positive
a7j1TR6211a	A	negative	negative	negative	positive	negative	negative	negative	positive
a7j2TR6212a	N	negative	negative	negative	negative	positive	negative	negative	negative
a7j6TR6214a	A	negative	negative	negative	negative	negative	negative	negative	negative
a7j8TR6216a	N	negative	negative	negative	negative	positive	negative	negative	negative
a7jjTR6227a	N	negative	negative	negative	negative	negative	negative	negative	negative
a7k3TR6243a	N	negative	negative	negative	positive	negative	negative	negative	negative
a7k4TR6247a	N	negative	negative	negative	negative	negative	negative	negative	negative
a7knTR6258a	A	negative	negative	negative	negative	negative	negative	negative	negative
a7ktTR6262a	N	negative	negative	negative	negative	negative	negative	negative	negative
a7m4TR6285a	A	negative	negative	negative	negative	negative	negative	negative	negative
a7m8TR6290a	N	negative	negative	negative	negative	negative	negative	negative	negative
a7maTR6293a	N	negative	negative	negative	negative	negative	negative	negative	negative
a7mcTR6301a	A	negative	negative	negative	negative	negative	negative	negative	negative
a7mpTR6300a	A	negative	negative	negative	positive	negative	negative	negative	negative
a7mtTR6305a	N	negative	negative	negative	negative	positive	negative	negative	negative
a7mwTR6307a	A	negative	negative	negative	negative	negative	negative	negative	negative
a7p0TR6336a	A	negative	negative	negative	positive	negative	negative	positive	positive
a7pdTR6357a	N	positive	negative	negative	negative	negative	negative	negative	negative
a7rdTR6389a	N	negative	negative	negative	positive	positive	negative	negative	negative
a7reTR6384a	A	negative	negative	negative	positive	negative	positive	positive	positive
a7rpTR6395a	A	negative	negative	negative	negative	negative	negative	negative	negative
a7rwTR6399a	A	negative	negative	negative	negative	negative	negative	negative	positive
a7t6TR6410a	A	negative	negative	negative	negative	negative	negative	negative	positive
a7tpTR6424a	N	negative	negative	negative	negative	negative	negative	negative	negative
a7w6TR6437a	N	negative	negative	negative	positive	negative	negative	negative	negative
a7w7TR6439a	N	negative	negative	negative	negative	negative	negative	negative	negative
a7wrTR6455a	N	negative	negative	negative	negative	positive	negative	positive	positive
a7wxTR6461a	N	negative	negative	negative	positive	negative	negative	negative	negative
a7x9TR6475a	N	negative	negative	negative	negative	negative	positive	negative	positive
a7xjTR6482a	N	negative	negative	negative	negative	negative	negative	negative	positive
a802TR6493a	N	negative	negative	negative	negative	negative	negative	negative	negative
a805TR6496a	N	negative	negative	negative	positive	negative	negative	negative	negative
a808TR6502a	N	negative	negative	negative	positive	negative	negative	negative	negative
a80eTR6509a	A	negative	negative	negative	positive	negative	negative	negative	negative
a80nTR6513a	N	negative	negative	negative	negative	negative	negative	negative	negative
a80wTR6515a	N	negative	negative	negative	negative	negative	negative	negative	positive
a80xTR6516a	A	negative	negative	negative	negative	negative	negative	negative	negative
a812TR6519a	A	negative	negative	negative	negative	positive	negative	negative	positive
a814TR6521a	N	negative	negative	negative	positive	negative	negative	negative	negative
a81jTR6538a	N	negative	negative	negative	negative	negative	positive	negative	negative
a81nTR6540a	N	negative	negative	negative	positive	negative	negative	negative	negative
a81rTR6545a	N	negative	negative	negative	negative	positive	negative	negative	negative
a825TR6555a	N	negative	negative	negative	positive	negative	negative	negative	negative
a827TR6558a	N	negative	negative	negative	negative	negative	negative	negative	negative
a82aTR6560a	A	negative	negative	negative	positive	negative	negative	negative	negative
a82cTR6564a	N	negative	negative	negative	positive	negative	negative	negative	negative
a82fTR6565a	N	negative	negative	negative	positive	negative	negative	negative	negative
a82tTR6576a	N	negative	negative	negative	negative	negative	negative	negative	negative
a82xTR6580a	A	negative	negative	negative	negative	negative	negative	negative	negative
a839TR6596a	N	negative	negative	negative	positive	negative	negative	negative	negative
a83dTR6599a	N	negative	negative	negative	negative	negative	negative	negative	negative
a842TR6617a	A	negative	negative	negative	positive	negative	negative	negative	negative
a84eTR6628a	N	negative	negative	negative	negative	negative	positive	negative	negative
a857TR6648a	A	negative	negative	negative	negative	negative	negative	negative	negative
a85pTR6663a	N	negative	negative	negative	negative	negative	negative	negative	negative
a85wTR6666a	A	negative	negative	negative	negative	negative	negative	negative	negative
a867TR6679a	A	negative	negative	negative	negative	negative	negative	negative	negative
a86jTR6690a	N	negative	negative	negative	positive	negative	negative	negative	negative
a86nTR6693a	N	negative	negative	negative	negative	positive	negative	negative	negative
a876TR6708a	A	negative	negative	negative	negative	negative	negative	negative	negative
a879TR6709a	A	negative	negative	negative	negative	negative	negative	negative	negative
a87aTR6710a	N	negative	negative	negative	negative	negative	negative	negative	negative
a87fTR6712a	A	negative	positive	negative	negative	negative	negative	negative	positive
a87jTR6714a	N	negative	positive	negative	positive	negative	negative	negative	negative
a87pTR6719a	N	positive	negative	negative	negative	negative	negative	negative	negative
a87tTR6721a	N	positive	negative	negative	negative	negative	positive	negative	negative
a87xTR6724a	N	negative	negative	negative	positive	negative	negative	negative	negative
a880TR6725a	N	negative	negative	negative	positive	negative	negative	negative	negative
a882TR6728a	A	negative	negative	negative	negative	negative	negative	negative	negative
a88hTR6743a	N	negative	negative	negative	negative	negative	negative	negative	negative
a88wTR6760a	A	negative	negative	negative	negative	negative	negative	negative	negative
a89eTR6772a	A	negative	negative	negative	negative	positive	negative	negative	negative
a89wTR6799a	N	negative	negative	negative	negative	negative	negative	negative	negative
[truncated: 2,164 more rows]

## Sheet: Complaints
Complaint	Number of participants
facial paralysis	10
liver complaints	10
fainting	14
facial pain	33
neuralgia	70
cardiac vascular	72
twitching	75
arthritis	89
muscle weakness	99
ear compl	150
lbemGP	183
eye compl	184
depressed mood	200
mood swings	202
malaise	221
nausea	221
abd pain	232
fever	232
tingling	235
concentration problems	238
dizzyness	238
lbemselfreported	244
skin rash	247
intestinal problems	292
itching	299
myalgia	300
nocturnal sweating	354
stiff neck	360
back pain	405
artralgia	413
flu	458
headache	601
fatigue	866
None	1931

## Sheet: Comorbidities_frailty
Comorbidities	immunocomprimised			Frailty Scale (n=number of complaints)
Asthma, chronic bronchitis or COPD	No			0	1	2	3	4	5	6	7	9
Inflammation of the paranasal sinuses, sinus cavities or maxillary sinuses	No			2380	1096	432	175	43	21	11	6	2
Severe heart disease or myocardial infarction	No			57.088	26.3373	16.5747
High bloodpressure	No
Stroke or consequences of stroke	No
Ulcer in intestines or duodenum	No
Severe intestinal disorders lasting longer than 3 months	No
Gallstones or inflammation of the gallbladder	No
Liver disease or liver cirrhosis	No
Kidney stones	No
Severe kidney disease	No
Chronic cystitis	No
Uterine prolapse	No
Diabetes mellitus	No
Thyroid abnormality	No
Back disorder of a persistent nature, longer than 3 months or hernia	No
Joint wear (osteoarthritis) of the knees, hips or hands	No
Joint inflammation (rheumatism) of the hands and / or feet	No
Other chronic rheumatism longer than 3 months	No
Epilepsy	No
Other diseases of the nervous system such as Parkinson's disease	No
Multiple sclerosis	No
Dizziness with falls	No
Migraine	No
Malignancy or cancer	Yes
Burnt out, depression, severe nervousness	No
Chronic skin disease or eczema	No
Accident injuries in and around sports, school, work or traffic	No
Immune disorder	Yes
Undergoing transplant	No
Alcohol addiction	No
Drug addiction	No
None of the above	No

## Sheet: Univariate analyses p>0.1
complaint	pathogen	term	estimate	std.error	statistic	p.value
comp_facial_paralysis	path_r_helvetica	educationlow	2.044	0.907501	2.25234	0.0243008
comp_facial_paralysis	path_r_helvetica	path_r_helvetica	1.75679	0.650248	2.70172	0.00689818
comp_facial_paralysis	path_neoehrlichia	educationlow	1.9928	0.899022	2.21663	0.0266482
comp_facial_paralysis	path_neoehrlichia	path_neoehrlichia	1.87198	0.698988	2.67812	0.00740366
comp_facial_paralysis	path_b_miyamotoi	educationlow	1.99255	0.894749	2.22694	0.0259511
comp_facial_paralysis	path_b_miyamotoi	path_b_miyamotoi	1.70054	0.80455	2.11366	0.0345447
comp_abd_pain	path_b_microti	path_b_microti	1.09649	0.511449	2.14389	0.0320414
comp_concentration_problems	path_b_microti	path_b_microti	0.843568	0.505631	1.66835	0.0952468
comp_concentration_problems	path_bsl	path_bsl	0.286514	0.155821	1.83874	0.0659532
comp_cardiac_vascular	path_r_helvetica	path_r_helvetica	0.595688	0.26242	2.26998	0.0232091
comp_headache	path_anaplasma	educationlow	-0.617552	0.265063	-2.32983	0.0198152
comp_headache	path_anaplasma	educationmedium	-0.183243	0.0991294	-1.84852	0.0645273
comp_headache	path_anaplasma	path_anaplasma	0.465649	0.233544	1.99384	0.0461697
comp_headache	path_neoehrlichia	educationlow	-0.621451	0.265605	-2.33975	0.0192964
comp_headache	path_neoehrlichia	educationmedium	-0.191423	0.0992034	-1.9296	0.0536566
comp_headache	path_neoehrlichia	path_neoehrlichia	0.394505	0.1681	2.34684	0.0189332
comp_headache	path_bsl	educationlow	-0.619656	0.265103	-2.33742	0.0194175
comp_headache	path_bsl	educationmedium	-0.183304	0.0991359	-1.84902	0.0644549
comp_headache	path_bsl	path_bsl	0.214381	0.106097	2.02061	0.0433201
comp_fever	path_b_ungulate	path_b_ungulate	0.773449	0.41455	1.86576	0.0620754
comp_fever	path_spiroplasma	path_spiroplasma	0.329897	0.158256	2.08457	0.037108
comp_fever	path_neoehrlichia	path_neoehrlichia	0.412336	0.248004	1.66262	0.0963885
comp_liver_complaints	path_b_microti	path_b_microti	2.30906	1.09809	2.1028	0.0354835
comp_nocturnal_sweating	path_anaplasma	path_anaplasma	0.820584	0.253013	3.24325	0.00118173
comp_eye_compl	path_spiroplasma	educationmedium	-0.298429	0.172505	-1.72997	0.0836351
comp_eye_compl	path_spiroplasma	path_spiroplasma	-0.431021	0.21855	-1.97219	0.0485882
comp_artralgia	path_spiroplasma	educationmedium	0.214617	0.114259	1.87835	0.060334
comp_artralgia	path_spiroplasma	path_spiroplasma	-0.257436	0.144461	-1.78205	0.0747408
comp_artralgia	path_bsl	educationmedium	0.215352	0.114249	1.88495	0.0594371
comp_artralgia	path_bsl	path_bsl	0.255288	0.126628	2.01605	0.0437947
comp_back_pain	path_r_helvetica	educationmedium	0.21617	0.111658	1.936	0.0528672
comp_back_pain	path_r_helvetica	path_r_helvetica	0.264016	0.123008	2.14634	0.031846
comp_depressed_mood	path_r_helvetica	path_r_helvetica	0.382414	0.167995	2.27634	0.0228258
comp_twitching	path_anaplasma	path_anaplasma	0.891976	0.479532	1.8601	0.0628717
comp_twitching	path_bsl	path_bsl	-0.859087	0.379169	-2.26571	0.023469
comp_mood_swings	path_r_helvetica	path_r_helvetica	0.299416	0.168901	1.77273	0.0762727
comp_stiff_neck	path_r_helvetica	educationlow	-0.596025	0.342921	-1.73808	0.0821963
comp_stiff_neck	path_r_helvetica	educationmedium	-0.223958	0.123353	-1.81559	0.0694339
comp_stiff_neck	path_r_helvetica	path_r_helvetica	0.22672	0.130186	1.7415	0.0815952
comp_stiff_neck	path_neoehrlichia	educationlow	-0.589072	0.342249	-1.72118	0.0852181
comp_stiff_neck	path_neoehrlichia	educationmedium	-0.226897	0.123461	-1.83781	0.0660907
comp_stiff_neck	path_neoehrlichia	path_neoehrlichia	0.429007	0.19996	2.14546	0.0319161
comp_tingling	path_spiroplasma	path_spiroplasma	-0.374522	0.190776	-1.96315	0.0496286
comp_lbemselfreported	path_b_microti	path_b_microti	0.878108	0.490128	1.79159	0.073199
comp_lbemselfreported	path_bsl	path_bsl	0.560578	0.143398	3.90925	9.25814e-05

## Sheet: Dataframe
Particiupant ID	comp_nocomp	comp_facial_pain	comp_facial_paralysis	comp_malaise	comp_abd_pain	comp_concentration_problems	comp_intestinal_problems	comp_dizzyness	comp_fainting	comp_arthritis	comp_flu	comp_cardiac_vascular	comp_headache	comp_skin_rash	comp_itching	comp_fever	comp_muscle_weakness	comp_liver_complaints	comp_nausea	comp_nocturnal_sweating	comp_eye_compl	comp_ear_compl	comp_artralgia	comp_back_pain	comp_depressed_mood	comp_myalgia	comp_twitching	comp_mood_swings	comp_stiff_neck	comp_tingling	comp_fatigue	comp_neuralgia	stage	path_anaplasma	path_b_ungulate	path_b_microti	path_r_helvetica	path_spiroplasma	path_neoehrlichia	path_b_miyamotoi	path_bsl	sex	age	education	frailty	comp_lbemselfreported	lbemGP	ab	lyme_meds
193TR1803	0	0	0	0	0	0	0	0	0	0	0	0	1	0	0	0	0	0	0	1	0	0	0	0	0	0	0	0	0	0	0	0	N	0	0	0	0	0	0	0	1	m	46	medium	0	0	0	0
283TR1619	0	0	0	0	0	0	0	0	0	0	0	0	0	1	0	0	0	0	0	0	0	0	0	0	0	0	0	0	0	0	0	0	A	0	0	0	0	0	0	0	0	m	38	high	0	0	0	0
306TR1313	0	0	0	0	0	0	0	0	0	0	0	0	0	1	0	0	0	0	0	0	0	0	0	1	0	0	0	0	0	0	1	0	N	0	0	0	0	0	1	0	1	m	66	high	0	0	0	0
420TR0654a	1	0	0	0	0	0	0	0	0	0	0	0	0	0	0	0	0	0	0	0	0	0	0	0	0	0	0	0	0	0	0	0	N	0	0	0	0	0	1	0	1	m	63	high	0	0	0	0
613TR758	1	0	0	0	0	0	0	0	0	0	0	0	0	0	0	0	0	0	0	0	0	0	0	0	0	0	0	0	0	0	0	0	N	0	0	0	0	0	0	0	1	m	47	low	0	0	0	0
703TR6062b	1	0	0	0	0	0	0	0	0	0	0	0	0	0	0	0	0	0	0	0	0	0	0	0	0	0	0	0	0	0	0	0	N	0	0	0	0	1	0	0	0	m	67	low	1	0	0	1
719TR568	0	0	0	0	0	1	0	0	0	0	0	0	1	0	0	1	0	0	0	0	0	1	1	1	1	1	0	0	1	1	1	0	N	0	0	0	1	0	1	0	1	m	58	medium	2	1	2	0
729TR630	0	0	0	0	0	0	0	0	0	0	0	0	0	0	0	0	0	0	0	0	0	0	1	0	0	0	1	0	0	1	0	0	N	0	0	0	0	0	0	0	1	f	57	low	3	1	1	0
759TR1056	0	0	0	0	0	0	0	0	0	0	0	0	0	0	0	0	0	0	0	1	0	0	0	0	0	0	0	0	0	0	0	0	A	1	0	0	0	1	0	0	0	f	50	high	0	0	0	0
994TR7553	0	0	0	0	0	0	0	0	0	0	1	0	0	0	0	1	0	0	0	0	0	0	0	1	0	0	0	0	0	0	0	0	N	0	0	0	0	0	1	1	1	m	54	medium	2	0	0	0
1104TR1112	0	0	0	0	0	0	0	0	0	1	0	0	0	0	0	0	0	0	0	1	0	0	0	0	0	0	1	0	0	0	1	0	N	0	0	0	0	1	0	0	0	f	72	medium	4	0	0	0
1111TR2096	0	0	0	0	0	0	1	0	0	0	0	1	0	0	0	0	1	0	0	1	1	0	1	1	0	0	0	0	1	1	1	0	N	0	0	0	1	0	0	0	0	f	57	high	5	0	0	0
1196TR4050a	0	0	0	1	0	0	1	0	0	0	1	0	0	0	0	0	0	0	1	0	0	0	0	0	0	0	0	0	0	0	0	0	N	0	0	0	0	0	0	0	0	m	62	high	0	0	0	1
1247TR1473	0	0	0	0	0	0	0	0	0	0	0	1	0	1	1	0	0	0	0	0	0	0	0	0	0	0	0	0	0	1	0	0	N	0	0	0	0	0	0	0	0	f	65	high	2	0	0	0
1281TR464	1	0	0	0	0	0	0	0	0	0	0	0	0	0	0	0	0	0	0	0	0	0	0	0	0	0	0	0	0	0	0	0	N	0	0	0	0	0	0	0	0	f	54	high	1	0	0	0
1469TR873	0	0	0	0	0	0	0	0	0	0	0	0	1	0	0	0	0	0	0	0	1	0	0	1	0	0	0	0	0	0	0	0	A	0	0	0	1	1	0	0	1	m	60	high	1	0	0	0
1632TR443	0	0	0	0	0	0	0	0	0	0	0	0	0	0	1	0	0	0	0	1	0	0	0	0	0	0	0	0	0	0	0	0	N	0	0	0	1	0	1	0	1	f	64	medium	2	0	0	0
1642TR450	0	0	0	0	0	0	0	0	0	0	0	0	0	1	1	0	0	0	0	0	0	0	0	0	0	0	0	0	0	0	0	0	N	0	0	0	0	0	0	0	0	m	59	high	0	0	0	0
1644TR451	0	0	0	0	0	0	0	0	0	0	0	0	0	0	0	0	0	0	0	1	0	0	1	0	0	0	0	1	0	0	1	0	A	0	1	0	0	1	0	0	0	f	49	high	0	0	0	0
1645TR452	1	0	0	0	0	0	0	0	0	0	0	0	0	0	0	0	0	0	0	0	0	0	0	0	0	0	0	0	0	0	0	0	N	0	0	0	0	0	0	0	0	f	62	high	0	0	0	0
1646TR454	1	0	0	0	0	0	0	0	0	0	0	0	0	0	0	0	0	0	0	0	0	0	0	0	0	0	0	0	0	0	0	0	N	0	0	0	0	0	0	0	0	m	48	medium	0	0	0	0
1650TR456	1	0	0	0	0	0	0	0	0	0	0	0	0	0	0	0	0	0	0	0	0	0	0	0	0	0	0	0	0	0	0	0	N	0	0	0	0	0	0	0	0	f	53	high	3	0	0	0
1651TR459	1	0	0	0	0	0	0	0	0	0	0	0	0	0	0	0	0	0	0	0	0	0	0	0	0	0	0	0	0	0	0	0	N	0	0	0	1	0	0	0	0	f	59	high	0	0	0	0
1656TR462	1	0	0	0	0	0	0	0	0	0	0	0	0	0	0	0	0	0	0	0	0	0	0	0	0	0	0	0	0	0	0	0	N	0	0	0	0	0	0	0	0	f	64	medium	3	0	0	0
1658TR463	1	0	0	0	0	0	0	0	0	0	0	0	0	0	0	0	0	0	0	0	0	0	0	0	0	0	0	0	0	0	0	0	N	0	0	0	0	0	0	0	1	m	6	high	0	0	0	0
1673TR469	0	0	0	0	0	0	0	0	0	1	0	0	0	0	0	0	0	0	0	0	0	0	1	0	0	0	0	1	0	0	1	0	N	0	0	0	0	0	0	0	0	m	63	high	3	0	0	0
1675TR472	0	0	0	0	0	0	0	0	0	0	0	0	1	0	0	0	0	0	0	0	0	0	0	0	0	0	0	0	0	0	0	0	A	0	0	0	0	0	0	0	1	f	57	high	2	0	0	0
1678TR524	1	0	0	0	0	0	0	0	0	0	0	0	0	0	0	0	0	0	0	0	0	0	0	0	0	0	0	0	0	0	0	0	N	0	0	0	0	0	0	0	0	f	70	high	1	0	0	0
1680TR475	1	0	0	0	0	0	0	0	0	0	0	0	0	0	0	0	0	0	0	0	0	0	0	0	0	0	0	0	0	0	0	0	N	0	0	0	0	0	0	0	0	f	64	high	2	0	0	0
1681TR476	1	0	0	0	0	0	0	0	0	0	0	0	0	0	0	0	0	0	0	0	0	0	0	0	0	0	0	0	0	0	0	0	A	0	0	0	0	1	0	0	0	f	61	medium	1	0	0	0
1687TR479	0	0	0	0	1	0	0	0	0	0	0	0	1	0	0	1	0	0	0	0	0	0	0	0	0	0	0	0	0	0	1	0	N	0	0	0	0	0	0	0	0	f	6	high	0	0	0	0
1690TR483	0	1	0	0	0	1	1	0	0	0	1	0	0	0	0	0	1	0	0	0	0	1	1	0	0	0	1	0	0	1	1	1	N	0	0	0	0	0	0	0	0	m	49	medium	0	0	0	0
1693TR482	0	0	0	0	0	0	0	0	0	0	0	0	0	0	0	0	0	0	0	0	0	0	1	0	0	1	0	0	1	0	1	0	N	0	0	0	0	0	0	0	0	m	63	low	3	0	0	0
1706TR491	0	0	0	1	0	0	0	0	0	0	0	0	0	0	0	0	0	0	0	0	0	0	1	1	0	0	0	0	0	0	1	0	N	0	0	0	1	0	0	0	1	f	30	high	1	1	0	0
1713TR495	0	0	0	0	0	0	0	0	0	0	0	0	0	0	0	0	0	0	0	0	0	0	0	1	0	0	0	0	0	0	0	0	N	0	0	0	0	1	0	0	0	m	45	high	0	0	0	0
1718TR498	0	1	0	0	0	0	0	0	0	0	0	0	0	0	1	0	0	0	0	0	0	0	0	0	0	0	0	0	0	0	0	0	N	0	0	0	0	0	0	0	0	f	43	high	3	0	0	0
1729TR505	0	0	0	0	0	0	0	0	0	0	0	0	0	0	0	0	0	0	0	0	0	0	0	0	0	0	0	0	0	0	0	0	A	0	0	0	0	0	0	0	0	m	79	high	1	0	0	0
1731TR543	1	0	0	0	0	0	0	0	0	0	0	0	0	0	0	0	0	0	0	0	0	0	0	0	0	0	0	0	0	0	0	0	A	0	0	0	0	0	0	0	0	f	38	high	2	0	0	0
1736TR512	0	0	0	0	0	0	1	0	0	0	0	0	0	0	0	0	0	0	0	0	0	0	0	0	0	0	0	0	0	0	0	0	N	0	0	0	0	0	0	0	0	m	32	high	0	0	0	0
1740TR515	0	0	0	0	0	0	0	0	0	1	0	0	1	0	0	1	0	0	0	0	0	0	0	0	0	0	0	0	0	0	0	0	N	0	0	0	0	0	0	0	0	m	52	high	0	0	0	0
1742TR1820	0	0	0	0	0	0	0	0	0	0	0	0	0	0	1	0	0	0	0	0	0	0	1	0	0	0	0	0	0	1	0	0	N	0	0	0	0	0	0	0	0	m	63	high	2	0	0	0
1791TR547	0	0	0	0	0	0	0	0	0	0	0	0	0	0	0	0	0	0	0	0	1	0	0	0	0	0	0	0	0	0	0	0	N	0	0	0	0	0	0	0	1	m	14	high	0	0	0	0
1795TR551	0	0	0	0	0	0	0	0	0	0	0	1	0	0	0	0	0	0	0	1	0	0	1	0	0	0	0	0	0	1	0	0	N	0	0	0	0	1	0	0	0	m	68	high	2	0	0	0	1
1797TR553	1	0	0	0	0	0	0	0	0	0	0	0	0	0	0	0	0	0	0	0	0	0	0	0	0	0	0	0	0	0	0	0	A	0	0	0	0	0	0	0	0	f	64	high	2	0	0	0
1802TR555	1	0	0	0	0	0	0	0	0	0	0	0	0	0	0	0	0	0	0	0	0	0	0	0	0	0	0	0	0	0	0	0	A	0	0	0	0	0	0	0	0	m	17	medium	0	0	0	0
1810TR558	1	0	0	0	0	0	0	0	0	0	0	0	0	0	0	0	0	0	0	0	0	0	0	0	0	0	0	0	0	0	0	0	N	0	0	0	0	0	0	0	0	f	10	medium	0	0	0	0
1817TR564	0	0	0	0	0	0	0	0	0	0	0	0	0	0	0	0	0	0	0	0	0	0	0	0	0	0	0	0	0	0	1	0	N	0	0	0	0	0	0	0	1	m	41	high	0	0	0	0
1818TR565	1	0	0	0	0	0	0	0	0	0	0	0	0	0	0	0	0	0	0	0	0	0	0	0	0	0	0	0	0	0	0	0	N	0	0	0	0	0	1	0	0	f	66	high	1	0	0	0
1821TR570	0	0	0	0	0	0	0	0	0	0	0	0	1	0	0	0	0	0	0	0	0	0	0	0	0	0	0	0	0	0	0	0	A	0	0	0	0	0	0	0	0	f	28	medium	1	0	0	0
1824TR574	1	0	0	0	0	0	0	0	0	0	0	0	0	0	0	0	0	0	0	0	0	0	0	0	0	0	0	0	0	0	0	0	N	0	0	0	1	0	0	0	0	f	51	medium	2	0	0	0
1827TR1435	0	0	0	0	0	0	0	0	0	0	0	0	0	0	0	0	0	0	0	0	1	0	0	0	0	0	0	0	0	0	0	0	N	0	0	0	0	1	0	0	0	m	73	high	1	0	0	0
1828TR577	1	0	0	0	0	0	0	0	0	0	0	0	0	0	0	0	0	0	0	0	0	0	0	0	0	0	0	0	0	0	0	0	N	0	0	0	0	0	0	0	1	m	68	medium	0	0	0	0
1830TR579	1	0	0	0	0	0	0	0	0	0	0	0	0	0	0	0	0	0	0	0	0	0	0	0	0	0	0	0	0	0	0	0	A	0	0	0	0	0	0	1	0	f	58	medium	0	0	0	0
1832TR580	0	0	0	0	0	0	1	0	0	0	0	0	0	1	0	0	0	0	0	0	0	0	0	0	0	0	0	0	0	0	0	0	A	0	0	0	0	0	0	0	0	f	47	medium	1	0	0	0
1836TR581	0	0	0	0	0	0	0	0	0	0	1	0	0	0	1	0	0	0	0	0	0	0	1	0	0	0	0	0	0	0	1	0	N	0	0	0	0	0	0	0	0	f	68	medium	2	0	0	0
1837TR584	1	0	0	0	0	0	0	0	0	0	0	0	0	0	0	0	0	0	0	0	0	0	0	0	0	0	0	0	0	0	0	0	A	0	0	0	0	0	0	0	0	f	52	low	1	0	0	0
1848TR598	0	0	0	0	0	1	0	0	0	0	0	0	0	0	0	0	0	0	0	0	0	0	0	1	0	0	0	0	0	0	1	0	N	0	0	0	0	0	0	0	0	f	45	medium	0	0	0	0
1850TR600	0	0	0	0	0	0	0	0	0	0	0	0	1	0	0	0	0	0	0	0	0	1	1	0	0	1	0	0	0	0	0	0	N	0	0	0	0	0	0	0	0	f	36	high	0	0	0	0
1851TR601	0	0	0	0	0	0	0	0	0	0	0	0	0	0	0	0	0	0	0	0	0	0	0	1	0	0	0	0	0	0	0	0	N	0	0	0	0	0	0	0	1	m	59	high	2	0	0	0
1857TR607	0	0	0	0	0	0	0	0	0	0	0	0	0	0	0	0	0	0	0	0	0	0	0	0	0	0	0	0	0	0	0	0	N	0	0	0	0	1	0	0	1	m	3	medium	0	0	0	0
1869TR4609a	0	0	0	0	0	0	0	0	0	0	1	0	0	0	0	1	0	0	1	1	0	0	0	0	0	0	0	0	0	0	1	0	N	0	0	0	0	1	0	0	1	m	61	medium	0	0	0	1
1878TR627	1	0	0	0	0	0	0	0	0	0	0	0	0	0	0	0	0	0	0	0	0	0	0	0	0	0	0	0	0	0	0	0	N	0	0	0	1	0	0	0	0	m	64	high	0	0	0	0
1881TR631	0	0	0	0	1	0	0	0	0	0	1	0	1	0	0	0	0	0	0	0	0	0	0	0	0	0	0	0	0	0	0	0	N	0	0	0	0	1	1	0	0	m	10	medium	0	0	0	0
1884TR634	0	0	0	0	0	0	0	0	0	0	1	0	1	0	0	0	0	0	1	1	0	0	0	0	0	0	0	0	0	0	0	0	N	0	0	0	0	0	0	0	0	m	11	medium	0	0	0	0
1886TR636	0	0	0	0	1	1	0	1	0	0	0	0	1	0	1	0	0	0	0	1	0	0	1	1	1	0	0	0	0	0	1	0	N	0	0	0	1	0	0	0	0	f	31	high	2	0	0	0
1890TR638	0	0	0	0	0	0	0	0	0	0	0	0	0	0	0	0	0	0	0	0	0	0	0	1	0	0	0	0	0	0	0	0	N	0	0	0	0	1	0	1	0	f	57	medium	0	0	0	0
1892TR641	0	0	0	0	0	0	0	0	0	0	0	0	1	0	0	0	0	0	1	0	0	1	0	0	0	0	0	0	1	0	0	0	N	0	0	0	0	0	0	0	0	m	37	high	1	0	0	0
1894TR643	1	0	0	0	0	0	0	0	0	0	0	0	0	0	0	0	0	0	0	0	0	0	0	0	0	0	0	0	0	0	0	0	N	0	0	0	0	0	0	0	0	m	60	high	0	0	0	0
1899TR646	0	0	0	0	1	1	0	0	0	0	0	0	1	0	0	0	0	0	0	0	0	0	0	0	0	0	0	0	0	0	1	0	N	0	0	0	0	0	0	0	1	f	9	high	1	0	0	0
1905TR651	0	0	0	0	0	0	0	0	0	0	0	0	0	0	0	0	0	0	0	0	0	0	0	0	0	0	0	0	0	0	0	1	N	0	0	0	0	0	0	0	0	f	39	high	0	0	0	0
1918TR665	0	0	0	0	0	0	1	0	0	0	0	0	0	0	0	0	0	0	0	0	0	0	0	0	0	0	0	0	0	0	1	0	A	0	0	0	0	0	0	0	0	f	38	medium	0	0	0	0
1926TR674	0	0	0	0	0	0	0	0	0	0	0	0	0	0	0	1	0	0	0	1	0	0	0	0	0	0	0	0	1	0	0	0	A	0	0	0	1	0	0	0	1	m	43	high	1	0	0	0
1927TR675	1	0	0	0	0	0	0	0	0	0	0	0	0	0	0	0	0	0	0	0	0	0	0	0	0	0	0	0	0	0	0	0	N	0	0	0	1	0	0	0	0	m	31	high	1	0	0	0
1935TR685	0	0	0	0	0	0	0	0	0	0	0	0	0	0	0	0	0	0	0	0	0	0	0	0	0	0	0	0	0	0	0	0	N	0	0	0	0	0	0	0	0	m	8	medium	1	0	0	0
1938TR2489	0	0	0	0	0	0	0	1	0	0	0	0	0	0	0	0	0	0	0	0	0	1	0	1	0	0	1	0	0	0	0	0	N	0	0	0	0	1	0	0	0	f	66	medium	2	0	0	0
1942TR688	0	0	0	0	0	0	0	0	0	0	0	0	0	0	0	0	0	0	0	0	0	0	0	1	0	1	0	0	0	0	0	0	N	0	0	0	0	0	0	0	0	f	42	high	2	0	0	0
1948TR693	0	0	0	0	0	0	0	0	0	0	0	0	0	0	0	0	0	0	0	1	0	0	1	0	0	0	0	1	0	0	1	0	N	0	0	0	0	0	0	0	0	f	61	high	1	0	0	0
1967TR1309	1	0	0	0	0	0	0	0	0	0	0	0	0	0	0	0	0	0	0	0	0	0	0	0	0	0	0	0	0	0	0	0	N	0	0	0	0	0	0	0	0	m	50	medium	3	0	0	1
1969TR0060a	1	0	0	0	0	0	0	0	0	0	0	0	0	0	0	0	0	0	0	0	0	0	0	0	0	0	0	0	0	0	0	0	N	0	0	0	0	0	0	0	0	m	44	high	0	0	0	0
1988TR737	1	0	0	0	0	0	0	0	0	0	0	0	0	0	0	0	0	0	0	0	0	0	0	0	0	0	0	0	0	0	0	0	N	0	0	0	0	0	0	0	1	f	57	medium	0	0	0	0
2007TR753	1	0	0	0	0	0	0	0	0	0	0	0	0	0	0	0	0	0	0	0	0	0	0	0	0	0	0	0	0	0	0	0	N	0	0	0	0	1	0	0	1	m	60	high	0	0	0	0
2011TR755	1	0	0	0	0	0	0	0	0	0	0	0	0	0	0	0	0	0	0	0	0	0	0	0	0	0	0	0	0	0	0	0	N	0	0	0	0	0	0	0	0	f	8	medium	0	0	0	0
2013TR757	1	0	0	0	0	0	0	0	0	0	0	0	0	0	0	0	0	0	0	0	0	0	0	0	0	0	0	0	0	0	0	0	N	0	0	0	0	0	0	0	0	f	76	high	2	0	0	0
2014TR759	1	0	0	0	0	0	0	0	0	0	0	0	0	0	0	0	0	0	0	0	0	0	0	0	0	0	0	0	0	0	0	0	N	0	0	0	0	0	0	0	0	f	60	high	0	0	0	0
2015TR762	1	0	0	0	0	0	0	0	0	0	0	0	0	0	0	0	0	0	0	0	0	0	0	0	0	0	0	0	0	0	0	0	N	0	0	0	0	0	1	0	0	m	42	high	2	0	0	1
2017TR763	0	0	0	0	0	0	0	0	0	1	0	0	0	0	0	0	0	0	0	0	1	0	0	0	0	1	1	0	1	0	0	0	N	0	0	0	0	0	0	0	0	f	71	high	4	0	0	0
2023TR769	1	0	0	0	0	0	0	0	0	0	0	0	0	0	0	0	0	0	0	0	0	0	0	0	0	0	0	0	0	0	0	0	N	0	0	0	0	0	0	0	1	f	5	high	0	0	0	0
2024TR770	1	0	0	0	0	0	0	0	0	0	0	0	0	0	0	0	0	0	0	0	0	0	0	0	0	0	0	0	0	0	0	0	N	0	0	0	0	1	0	0	0	f	65	medium	0	0	0	0
2025TR774	1	0	0	0	0	0	0	0	0	0	0	0	0	0	0	0	0	0	0	0	0	0	0	0	0	0	0	0	0	0	0	0	A	0	0	0	0	0	0	0	0	m	75	high	1	0	0	0
2027TR775	1	0	0	0	0	0	0	0	0	0	0	0	0	0	0	0	0	0	0	0	0	0	0	0	0	0	0	0	0	0	0	0	N	0	0	0	0	0	0	0	0	f	67	medium	2	0	0	0
2048TR794	1	0	0	0	0	0	0	0	0	0	0	0	0	0	0	0	0	0	0	0	0	0	0	0	0	0	0	0	0	0	0	0	N	0	0	0	0	0	0	0	0	f	57	high	0	0	0	0
2050TR7881	0	0	0	0	0	0	0	0	0	0	1	0	1	0	0	0	0	0	0	0	0	0	0	0	0	0	0	0	1	0	0	0	N	0	0	0	0	1	0	0	0	m	65	high	0	0	0	0
2052TR799	1	0	0	0	0	0	0	0	0	0	0	0	0	0	0	0	0	0	0	0	0	0	0	0	0	0	0	0	0	0	0	0	N	0	0	0	0	0	0	0	1	m	8	high	0	0	0	0
2057TR805	0	0	0	0	0	1	0	0	0	0	0	0	0	1	1	0	0	0	0	1	0	0	0	0	0	0	0	1	0	0	1	0	N	0	0	0	1	0	0	0	0	f	56	medium	0	0	0	0
2059TR806	0	0	0	0	0	0	0	0	0	0	0	0	0	1	1	0	0	0	0	0	0	0	0	0	0	0	0	0	0	0	0	0	N	0	0	0	0	0	1	0	1	f	9	low	0	0	0	0
2060TR808	1	0	0	0	0	0	0	0	0	0	0	0	0	0	0	0	0	0	0	0	0	0	0	0	0	0	0	0	0	0	0	0	A	0	0	0	0	0	0	0	0	m	51	high	0	0	0	0
2066TR818	0	0	0	0	0	0	0	0	0	0	0	0	0	0	0	0	0	0	0	0	0	0	0	1	0	0	0	0	0	0	0	0	N	0	0	0	1	0	1	0	0	m	57	high	0	0	0	0
2079TR825	1	0	0	0	0	0	0	0	0	0	0	0	0	0	0	0	0	0	0	0	0	0	0	0	0	0	0	0	0	0	0	0	N	0	0	0	0	0	0	0	0	m	10	high	0	0	0	0
2080TR826	0	0	0	0	0	0	0	0	0	0	0	0	0	0	0	0	0	0	0	1	0	0	0	0	0	0	0	0	0	0	0	0	N	0	0	0	0	0	0	0	0	m	57	medium	0	0	0	0
2081TR828	1	0	0	0	0	0	0	0	0	0	0	0	0	0	0	0	0	0	0	0	0	0	0	0	0	0	0	0	0	0	0	0	N	0	0	0	0	1	0	0	0	f	37	medium	3	0	0	0
2082TR829	1	0	0	0	0	0	0	0	0	0	0	0	0	0	0	0	0	0	0	0	0	0	0	0	0	0	0	0	0	0	0	0	N	0	0	0	0	0	0	1	1	m	70	high	1	0	0	0
2084TR830	1	0	0	0	0	0	0	0	0	0	0	0	0	0	0	0	0	0	0	0	0	0	0	0	0	0	0	0	0	0	0	0	N	0	0	0	1	0	0	0	1	m	9	medium	0	0	0	0
2086TR836	1	0	0	0	0	0	0	0	0	0	0	0	0	0	0	0	0	0	0	0	0	0	0	0	0	0	0	0	0	0	0	0	N	0	0	0	0	1	0	0	0	m	70	high	0	0	0	0
2090TR838	1	0	0	0	0	0	0	0	0	0	0	0	0	0	0	0	0	0	0	0	0	0	0	0	0	0	0	0	0	0	0	0	N	0	0	0	0	1	0	0	1	f	4	high	0	0	0	0
2099TR843	1	0	0	0	0	0	0	0	0	0	0	0	0	0	0	0	0	0	0	0	0	0	0	0	0	0	0	0	0	0	0	0	A	0	0	0	1	0	0	0	1	m	9	low	0	0	0	0
2106TR848	0	0	0	0	0	0	0	0	0	0	1	0	1	0	0	0	0	0	0	0	0	0	0	0	0	0	0	0	0	0	1	0	N	0	0	0	0	0	0	1	0	f	42	high	0	0	0	0
2109TR851	1	0	0	0	0	0	0	0	0	0	0	0	0	0	0	0	0	0	0	0	0	0	0	0	0	0	0	0	0	0	0	0	N	0	0	0	0	0	0	0	0	m	78	high	1	0	0	0
2112TR855	1	0	0	0	0	0	0	0	0	0	0	0	0	0	0	0	0	0	0	0	0	0	0	0	0	0	0	0	0	0	0	0	A	0	0	0	1	0	0	0	1	f	45	high	0	0	0	0
2113TR2122	0	0	0	1	0	1	0	0	0	0	1	0	1	0	1	0	0	0	0	0	1	0	0	0	0	0	0	0	0	0	1	0	N	0	0	0	0	0	0	0	0	m	26	high	1	0	0	0
2116TR860	1	0	0	0	0	0	0	0	0	0	0	0	0	0	0	0	0	0	0	0	0	0	0	0	0	0	0	0	0	0	0	0	N	0	0	0	0	0	0	0	0	m	59	high	0	0	0	0
2117TR862	1	0	0	0	0	0	0	0	0	0	0	0	0	0	0	0	0	0	0	0	0	0	0	0	0	0	0	0	0	0	0	0	N	0	0	0	0	0	0	1	1	f	59	high	1	0	0	0
2123TR871	1	0	0	0	0	0	0	0	0	0	0	0	0	0	0	0	0	0	0	0	0	0	0	0	0	0	0	0	0	0	0	0	A	0	0	0	0	1	0	0	1	m	52	medium	1	0	0	0
2126TR973	1	0	0	0	0	0	0	0	0	0	0	0	0	0	0	0	0	0	0	0	0	0	0	0	0	0	0	0	0	0	0	0	N	0	0	0	0	0	0	0	0	f	51	high	0	0	0	0
2128TR878	1	0	0	0	0	0	0	0	0	0	0	0	0	0	0	0	0	0	0	0	0	0	0	0	0	0	0	0	0	0	0	0	N	0	0	0	1	0	0	0	0	m	46	high	1	0	0	0
2130TR882	0	0	0	0	0	0	0	0	0	0	0	0	1	0	0	0	0	0	0	0	0	0	0	0	0	0	0	0	0	0	1	0	N	0	0	0	0	0	0	0	0	m	57	medium	2	0	0	0
2133TR1198	1	0	0	0	0	0	0	0	0	0	0	0	0	0	0	0	0	0	0	0	0	0	0	0	0	0	0	0	0	0	0	0	N	0	0	0	1	0	0	0	0	m	63	high	1	0	0	0
2134TR887	1	0	0	0	0	0	0	0	0	0	0	0	0	0	0	0	0	0	0	0	0	0	0	0	0	0	0	0	0	0	0	0	N	0	0	0	0	0	0	0	1	m	27	high	0	0	0	0
2136TR890	1	0	0	0	0	0	0	0	0	0	0	0	0	0	0	0	0	0	0	0	0	0	0	0	0	0	0	0	0	0	0	0	N	0	0	0	0	0	0	0	0	m	47	high	0	0	0	0
2137TR2069	1	0	0	0	0	0	0	0	0	0	0	0	0	0	0	0	0	0	0	0	0	0	0	0	0	0	0	0	0	0	0	0	A	0	0	0	0	1	0	0	1	f	77	high	0	0	0	0
2142TR896	1	0	0	0	0	0	0	0	0	0	0	0	0	0	0	0	0	0	0	0	0	0	0	0	0	0	0	0	0	0	0	0	N	0	0	0	1	0	0	0	0	f	65	high	0	0	0	0
2144TR900	0	0	0	0	0	0	0	0	0	0	1	0	0	0	0	0	0	0	0	0	0	0	0	0	0	0	0	0	1	0	0	0	A	0	0	0	0	1	0	0	0	m	30	medium	0	0	0	0
2148TR2855	0	0	0	1	1	0	1	0	0	0	1	0	0	0	0	1	0	0	0	0	0	0	0	1	0	0	0	0	0	0	0	0	N	0	0	0	0	0	0	0	0	f	30	high	1	0	0	0
2155TR908	1	0	0	0	0	0	0	0	0	0	0	0	0	0	0	0	0	0	0	0	0	0	0	0	0	0	0	0	0	0	0	0	A	0	0	0	0	0	0	0	0	f	54	high	0	0	0	0
2158TR911	1	0	0	0	0	0	0	0	0	0	0	0	0	0	0	0	0	0	0	0	0	0	0	0	0	0	0	0	0	0	0	0	N	0	0	0	0	1	0	0	0	f	40	high	2	0	0	0
2164TR916	1	0	0	0	0	0	0	0	0	0	0	0	0	0	0	0	0	0	0	0	0	0	0	0	0	0	0	0	0	0	0	0	N	0	0	0	1	1	0	0	0	m	9	high	0	0	0	0
2168TR922	0	0	0	0	0	0	0	0	0	0	0	0	0	0	0	0	0	0	0	0	0	0	0	0	0	0	0	0	0	0	0	0	A	0	0	0	0	0	0	0	0	m	75	high	1	0	0	0
2169TR923	0	0	0	0	0	0	0	0	0	0	0	0	0	0	0	0	0	0	0	0	1	0	0	0	0	0	0	0	0	0	0	0	N	0	0	0	0	0	1	0	1	m	22	high	0	0	0	0
2177TR930	0	0	0	0	0	0	0	0	1	0	0	0	0	0	0	0	0	0	1	0	0	0	0	0	0	0	0	0	0	0	0	0	A	0	0	0	0	0	0	0	1	f	7	high	0	0	0	0
2179TR935	0	0	0	0	0	0	0	0	0	0	0	0	0	1	1	1	0	0	0	0	0	0	0	0	0	0	0	0	0	0	0	0	A	0	0	0	0	0	0	0	0	f	56	high	1	0	0	0
2183TR6962	0	0	0	0	0	0	0	0	0	0	0	0	0	0	0	0	0	0	0	0	0	0	1	0	0	0	0	0	1	1	1	0	N	0	0	0	1	0	0	1	0	f	42	high	0	0	0	0
2184TR1202	1	0	0	0	0	0	0	0	0	0	0	0	0	0	0	0	0	0	0	0	0	0	0	0	0	0	0	0	0	0	0	0	N	1	1	0	1	0	0	0	0	f	6	high	0	0	0	0
2189TR945	1	0	0	0	0	0	0	0	0	0	0	0	0	0	0	0	0	0	0	0	0	0	0	0	0	0	0	0	0	0	0	0	N	0	0	0	0	1	0	0	0	m	1	high	0	0	0	0
2194TR947	1	0	0	0	0	0	0	0	0	0	0	0	0	0	0	0	0	0	0	0	0	0	0	0	0	0	0	0	0	0	0	0	N	0	0	0	0	1	0	0	0	m	5	high	0	0	0	0
2196TR948	0	0	0	1	0	0	0	0	0	0	1	0	1	0	0	1	0	0	0	0	0	0	0	0	0	1	0	0	1	0	0	0	N	0	0	0	1	0	1	1	0	m	4	high	0	0	0	0
2197TR951	1	0	0	0	0	0	0	0	0	0	0	0	0	0	0	0	0	0	0	0	0	0	0	0	0	0	0	0	0	0	0	0	N	0	0	0	1	0	0	0	0	f	65	low	3	0	0	0
2205TR1353	0	0	0	0	0	0	0	0	0	0	0	0	0	0	0	0	0	0	0	0	0	0	0	0	0	0	0	0	0	0	0	0	A	0	1	0	0	0	0	0	0	m	56	medium	1	0	0	0
2213TR965	0	0	0	1	0	0	0	0	0	0	0	0	0	0	0	0	0	0	0	0	0	0	0	0	0	0	0	0	1	0	1	0	N	0	0	0	0	0	0	0	1	f	38	high	0	0	0	0
2215TR969	1	0	0	0	0	0	0	0	0	0	0	0	0	0	0	0	0	0	0	0	0	0	0	0	0	0	0	0	0	0	0	0	N	0	0	0	0	0	0	0	0	m	43	high	0	0	0	0
2217TR970	0	0	0	0	0	0	0	0	0	0	0	0	0	0	0	0	0	0	1	0	1	0	0	0	0	1	0	0	0	0	1	0	N	0	0	0	0	0	0	0	0	f	18	low	2	0	0	0
2219TR971	1	0	0	0	0	0	0	0	0	0	0	0	0	0	0	0	0	0	0	0	0	0	0	0	0	0	0	0	0	0	0	0	A	0	0	0	0	0	1	0	1	m	7	high	0	0	0	0
2220TR974	0	0	0	0	0	0	1	0	0	0	0	0	0	0	0	0	0	0	0	0	0	0	0	0	0	0	0	1	0	0	1	0	N	0	0	0	0	0	0	0	0	f	24	medium	0	0	0	0
2228TR1397	1	0	0	0	0	0	0	0	0	0	0	0	0	0	0	0	0	0	0	0	0	0	0	0	0	0	0	0	0	0	0	0	N	0	0	0	0	0	0	0	0	m	53	high	1	0	0	0
2230TR984	1	0	0	0	0	0	0	0	0	0	0	0	0	0	0	0	0	0	0	0	0	0	0	0	0	0	0	0	0	0	0	0	A	0	0	0	1	0	0	0	0	m	7	high	0	0	0	0
2232TR986	0	0	0	0	0	0	0	0	1	0	0	0	0	0	0	0	1	0	0	0	0	0	0	0	0	0	0	0	1	0	0	0	N	0	0	0	0	0	0	0	0	f	48	high	3	0	0	0
2239TR993	0	0	0	0	0	1	0	0	0	0	1	0	0	0	0	0	0	0	0	0	0	0	1	0	1	0	0	1	1	0	1	0	N	0	0	0	0	0	0	0	0	m	59	low	1	0	0	0
2253TR1009	1	0	0	0	0	0	0	0	0	0	0	0	0	0	0	0	0	0	0	0	0	0	0	0	0	0	0	0	0	0	0	0	A	0	0	0	0	0	0	0	0	f	60	high	1	0	0	0
2255TR1011	0	0	0	0	0	0	0	0	0	0	0	0	0	0	0	0	0	0	0	0	1	0	0	0	0	0	0	0	0	0	0	0	N	0	0	0	1	0	0	0	0	m	53	high	0	0	0	0
2266TR1026	0	0	0	0	1	0	1	0	0	0	1	0	1	0	0	1	0	0	1	0	0	0	0	0	0	0	0	0	0	0	1	0	N	0	0	0	0	0	0	0	0	f	28	high	2	0	0	0
2274TR1038	1	0	0	0	0	0	0	0	0	0	0	0	0	0	0	0	0	0	0	0	0	0	0	0	0	0	0	0	0	0	0	0	N	0	0	0	0	0	0	0	0	f	54	high	0	0	0	0
2281TR1042	0	0	0	0	0	0	0	0	0	0	0	0	1	0	0	0	0	0	0	0	0	0	0	0	0	0	0	0	0	0	0	0	N	0	1	0	0	0	0	0	1	f	14	high	1	0	0	0
2285TR1047	1	0	0	0	0	0	0	0	0	0	0	0	0	0	0	0	0	0	0	0	0	0	0	0	0	0	0	0	0	0	0	0	N	0	0	0	0	1	0	0	0	f	7	high	0	0	0	0
2286TR1048	0	0	0	0	0	0	0	0	0	0	0	0	0	0	1	0	0	0	0	0	0	0	0	0	0	0	0	0	1	0	1	0	N	0	0	0	1	0	1	0	1	f	40	high	0	0	0	0
2295TR1057	1	0	0	0	0	0	0	0	0	0	0	0	0	0	0	0	0	0	0	0	0	0	0	0	0	0	0	0	0	0	0	0	N	0	0	0	1	0	0	0	1	m	31	high	0	0	0	0
2299TR1064	1	0	0	0	0	0	0	0	0	0	0	0	0	0	0	0	0	0	0	0	0	0	0	0	0	0	0	0	0	0	0	0	N	0	0	0	0	0	0	0	0	f	39	high	0	0	0	0
2302TR1068	0	0	0	0	0	1	0	1	0	0	0	0	0	0	0	0	0	0	0	0	0	0	0	1	0	0	0	0	0	0	0	1	N	0	0	0	0	1	0	0	0	f	38	high	1	0	0	0
2303TR1070	0	0	0	0	0	0	0	0	0	0	0	0	0	0	0	0	0	0	0	0	1	0	1	0	0	0	0	0	0	0	0	0	N	0	0	0	0	0	0	0	0	m	66	low	2	0	0	0
2321TR1089	0	0	0	0	0	0	0	0	0	0	0	0	0	1	1	0	0	0	0	1	0	0	0	0	0	0	0	0	0	0	1	0	N	0	0	0	0	0	0	0	0	m	60	high	1	0	0	0
2323TR1090	1	0	0	0	0	0	0	0	0	0	0	0	0	0	0	0	0	0	0	0	0	0	0	0	0	0	0	0	0	0	0	0	N	0	0	0	0	0	0	0	0	m	59	high	1	0	0	0
2326TR1096	1	0	0	0	0	0	0	0	0	0	0	0	0	0	0	0	0	0	0	0	0	0	0	0	0	0	0	0	0	0	0	0	A	0	0	0	0	0	1	0	1	m	67	low	0	0	0	0
2327TR1097	1	0	0	0	0	0	0	0	0	0	0	0	0	0	0	0	0	0	0	0	0	0	0	0	0	0	0	0	0	0	0	0	N	0	0	0	0	0	0	0	0	m	40	high	0	0	0	0
2328TR1099	0	0	0	0	0	0	0	0	0	0	0	0	0	0	1	0	0	0	0	0	0	0	0	0	0	0	1	0	0	0	0	0	N	0	0	0	0	1	0	0	0	m	40	medium	1	0	0	0
2331TR1105	1	0	0	0	0	0	0	0	0	0	0	0	0	0	0	0	0	0	0	0	0	0	0	0	0	0	0	0	0	0	0	0	N	0	0	0	0	0	0	0	0	f	54	medium	1	0	0	0
2333TR1106	1	0	0	0	0	0	0	0	0	0	0	0	0	0	0	0	0	0	0	0	0	0	0	0	0	0	0	0	0	0	0	0	A	0	0	0	0	0	0	0	0	m	61	medium	0	0	0	0
2336TR1111	0	0	0	0	0	0	1	0	0	0	0	0	0	1	1	1	0	0	0	0	0	0	0	0	0	0	0	0	1	0	1	0	A	0	0	0	0	0	0	0	0	f	67	high	2	0	0	0
2344TR1124	0	0	0	0	0	0	0	0	0	0	0	0	0	0	0	0	0	0	0	0	0	0	1	0	0	1	0	0	0	0	0	0	N	0	0	0	0	0	0	0	0	m	63	high	6	0	0	0
2349TR1128	1	0	0	0	0	0	0	0	0	0	0	0	0	0	0	0	0	0	0	0	0	0	0	0	0	0	0	0	0	0	0	0	A	0	0	0	0	0	1	0	0	m	6	medium	0	0	0	0
2360TR1138	1	0	0	0	0	0	0	0	0	0	0	0	0	0	0	0	0	0	0	0	0	0	0	0	0	0	0	0	0	0	0	0	N	0	0	0	0	0	0	0	0	m	13	high	0	0	0	0
2371TR1148	1	0	0	0	0	0	0	0	0	0	0	0	0	0	0	0	0	0	0	0	0	0	0	0	0	0	0	0	0	0	0	0	N	0	0	0	0	1	0	0	0	f	8	high	0	0	0	0
2373TR1149	1	0	0	0	0	0	0	0	0	0	0	0	0	0	0	0	0	0	0	0	0	0	0	0	0	0	0	0	0	0	0	0	N	0	0	0	1	0	0	0	1	m	1	high	0	0	0	0
2378TR1152	1	0	0	0	0	0	0	0	0	0	0	0	0	0	0	0	0	0	0	0	0	0	0	0	0	0	0	0	0	0	0	0	A	0	0	0	1	0	0	0	0	f	59	high	0	0	0	0
2380TR1154	0	0	0	0	1	0	0	0	0	0	0	0	0	0	0	0	0	0	0	0	0	0	0	1	0	0	0	1	0	0	1	0	N	0	0	0	1	0	0	0	1	f	68	high	0	0	0	0
2383TR1157	0	0	0	0	0	0	0	0	0	0	0	0	0	0	0	0	0	0	0	0	0	0	0	0	0	1	0	0	0	0	0	0	N	0	0	0	0	0	1	0	0	m	70	medium	0	0	0	0
2393TR1165	0	0	0	0	0	1	0	0	0	0	1	0	0	0	0	0	0	0	0	0	0	0	1	0	0	1	0	0	0	0	0	0	N	0	0	0	0	0	0	0	1	f	43	high	1	0	0	0
2400TR1172	0	0	0	0	0	0	0	0	0	0	0	0	1	0	0	0	0	0	0	0	0	0	0	0	0	0	0	0	0	0	0	0	N	0	0	0	1	0	0	0	0	m	52	high	0	0	0	0
2410TR1180	0	0	0	0	0	0	0	0	0	0	1	0	0	0	0	1	0	0	0	0	0	1	0	0	0	0	0	0	0	0	0	0	N	0	0	0	0	0	0	0	0	m	2	high	0	0	0	0
2412TR1184	0	0	0	0	0	0	0	0	0	0	0	0	0	1	1	0	0	0	0	0	0	0	0	0	0	0	0	0	0	0	0	0	N	0	0	0	0	0	0	0	0	f	59	high	1	0	0	0
2418TR1191	1	0	0	0	0	0	0	0	0	0	0	0	0	0	0	0	0	0	0	0	0	0	0	0	0	0	0	0	0	0	0	0	N	0	0	0	0	0	0	0	0	f	11	high	0	0	0	0
2421TR1193	1	0	0	0	0	0	0	0	0	0	0	0	0	0	0	0	0	0	0	0	0	0	0	0	0	0	0	0	0	0	0	0	N	0	0	0	1	0	0	0	0	f	8	medium	0	0	0	0
2426TR1200	0	0	0	0	0	0	0	0	0	0	0	0	1	0	0	0	0	0	0	0	0	0	0	0	1	0	0	0	0	1	1	0	N	0	0	0	0	0	0	0	0	f	67	medium	3	0	0	0
2435TR1211	0	0	0	0	0	0	0	0	0	0	0	0	1	0	0	0	0	0	0	0	0	0	0	1	0	0	0	0	1	0	1	0	N	0	0	0	0	0	0	0	0	m	60	high	1	0	0	0
2436TR1213	0	0	0	0	0	0	0	0	0	0	0	1	0	0	0	0	0	0	0	1	0	0	1	1	0	0	0	0	0	1	0	1	N	0	0	0	0	0	0	0	0	f	65	high	3	0	0	0
2438TR2373	0	0	0	0	0	0	0	0	0	0	0	0	0	0	0	0	0	0	0	0	0	0	0	0	0	0	0	0	0	0	1	0	N	1	0	0	1	0	0	0	1	m	47	high	0	0	0	0
2449TR2107b	0	0	0	0	0	0	0	0	0	0	0	0	0	0	0	0	0	0	0	0	0	0	0	0	0	0	0	0	0	0	1	0	N	0	0	0	0	0	0	0	0	f	58	high	1	0	0	0
2453TR1233	0	0	0	0	0	0	0	0	0	0	0	0	1	1	0	0	1	0	0	0	1	0	0	0	0	0	0	0	0	0	1	0	N	0	0	0	0	0	0	0	0	f	54	medium	3	0	0	0
2458TR6720	1	0	0	0	0	0	0	0	0	0	0	0	0	0	0	0	0	0	0	0	0	0	0	0	0	0	0	0	0	0	0	0	N	0	0	0	0	0	0	1	0	f	53	high	0	0	0	0
2466TR1250	1	0	0	0	0	0	0	0	0	0	0	0	0	0	0	0	0	0	0	0	0	0	0	0	0	0	0	0	0	0	0	0	A	0	0	0	0	0	0	0	0	m	68	medium	1	0	0	0
2468TR2038	1	0	0	0	0	0	0	0	0	0	0	0	0	0	0	0	0	0	0	0	0	0	0	0	0	0	0	0	0	0	0	0	N	0	0	0	0	1	0	0	0	f	51	medium	2	0	0	1
2482TR1272	1	0	0	0	0	0	0	0	0	0	0	0	0	0	0	0	0	0	0	0	0	0	0	0	0	0	0	0	0	0	0	0	N	0	0	0	0	0	0	0	1	m	70	high	1	0	0	0
2483TR1273	0	0	0	0	0	0	0	1	0	0	0	0	0	0	0	0	0	0	0	0	0	0	0	0	0	0	0	0	0	0	0	0	N	0	0	0	0	0	0	0	0	f	42	medium	1	0	0	0
2501TR1298	1	0	0	0	0	0	0	0	0	0	0	0	0	0	0	0	0	0	0	0	0	0	0	0	0	0	0	0	0	0	0	0	N	0	0	0	0	0	0	0	0	m	29	medium	0	0	0	0
2508TR1314	1	0	0	0	0	0	0	0	0	0	0	0	0	0	0	0	0	0	0	0	0	0	0	0	0	0	0	0	0	0	0	0	N	0	0	0	0	0	0	0	1	m	36	high	0	1	0	0
2509TR1317	1	0	0	0	0	0	0	0	0	0	0	0	0	0	0	0	0	0	0	0	0	0	0	0	0	0	0	0	0	0	0	0	N	0	0	0	0	0	0	0	0	f	6	high	0	0	0	0
2511TR1319	0	0	0	0	0	0	1	1	0	0	0	0	0	0	0	0	0	0	1	0	0	0	0	0	0	0	0	0	0	0	1	0	N	0	0	0	0	1	0	0	0	f	67	high	1	0	0	0
2537TR1341	0	0	0	0	1	0	1	1	0	0	1	0	0	0	0	0	0	0	0	0	1	1	0	0	1	1	0	0	0	0	0	0	A	0	0	0	1	0	0	0	0	m	85	medium	3	0	0	1
2542TR1344	0	0	0	0	0	0	0	0	0	0	0	0	0	0	0	0	0	0	0	0	0	0	0	1	0	0	0	0	0	0	0	0	N	0	0	0	1	0	0	0	0	m	44	high	0	0	0	0
2543TR1345	0	0	0	0	0	0	0	0	0	0	0	0	0	1	0	0	0	0	0	0	0	0	1	0	0	1	0	0	0	0	0	0	N	0	0	0	1	0	0	0	1	f	57	high	0	1	0	0
2546TR1347	0	0	0	0	0	0	0	0	0	0	0	0	0	0	0	1	0	0	0	1	0	0	0	0	0	0	0	0	0	0	0	0	N	0	0	0	0	0	0	0	1	m	4	high	1	0	0	0
2547TR1349	0	0	0	1	0	0	0	0	0	0	1	0	0	0	0	0	1	0	0	0	1	0	0	0	0	0	0	1	0	0	1	0	N	0	0	0	1	0	0	0	0	f	50	medium	0	0	0	0
2549TR1348	1	0	0	0	0	0	0	0	0	0	0	0	0	0	0	0	0	0	0	0	0	0	0	0	0	0	0	0	0	0	0	0	N	0	0	0	0	1	0	0	0	m	5	high	1	0	0	0
2553TR4159	0	0	0	0	0	0	0	0	0	1	0	0	0	0	0	0	0	0	0	0	0	0	1	0	0	0	0	0	0	0	0	0	N	0	0	0	0	1	0	0	1	f	73	medium	2	0	0	0
2555TR1357	1	0	0	0	0	0	0	0	0	0	0	0	0	0	0	0	0	0	0	0	0	0	0	0	0	0	0	0	0	0	0	0	A	0	0	0	0	1	0	0	0	f	70	high	1	0	0	0
2556TR1359	0	0	0	0	0	0	0	0	0	0	0	0	0	0	0	0	0	0	0	1	0	0	0	0	0	0	0	0	0	0	1	0	A	0	0	0	0	0	0	0	0	f	58	high	2	0	0	0
2571TR1372	0	0	0	0	1	1	0	0	0	0	0	0	1	0	0	0	0	0	0	0	0	0	0	0	1	0	0	1	0	0	1	0	A	0	0	0	0	0	0	0	1	f	48	high	0	0	0	0
2574TR1379	0	0	0	0	0	0	0	0	0	0	0	0	0	0	0	0	0	0	0	1	0	0	1	0	0	0	0	0	0	0	0	0	N	0	0	0	0	0	0	0	1	m	74	high	0	0	0	0
2588TR1398	0	0	0	0	0	0	0	0	0	0	0	0	1	0	0	0	0	0	0	1	0	0	0	0	0	0	0	0	0	0	0	0	N	0	0	0	1	0	0	0	0	f	37	high	1	0	0	0
2590TR1402	1	0	0	0	0	0	0	0	0	0	0	0	0	0	0	0	0	0	0	0	0	0	0	0	0	0	0	0	0	0	0	0	N	0	0	0	0	1	0	0	0	f	40	high	0	0	0	0
2594TR1406	0	0	0	0	0	0	0	0	0	0	0	0	1	0	0	0	0	0	0	0	0	1	0	0	0	1	0	0	1	1	0	0	N	0	0	0	0	1	0	0	0	m	69	high	2	0	0	0
2599TR1410	1	0	0	0	0	0	0	0	0	0	0	0	0	0	0	0	0	0	0	0	0	0	0	0	0	0	0	0	0	0	0	0	N	0	0	0	0	0	0	0	0	f	14	high	0	0	0	0
2600TR1411	0	0	0	0	0	1	0	0	0	0	0	0	0	0	0	0	0	0	0	0	0	0	0	0	0	0	0	1	0	0	0	0	N	0	0	0	0	0	0	0	0	m	43	high	2	0	0	0
2613TR1430	0	0	0	1	0	1	0	1	0	0	1	0	1	0	0	0	0	0	0	0	1	1	0	1	0	0	1	1	0	0	1	0	A	0	0	0	1	0	0	0	0	m	47	high	1	0	0	0
2614TR1431	1	0	0	0	0	0	0	0	0	0	0	0	0	0	0	0	0	0	0	0	0	0	0	0	0	0	0	0	0	0	0	0	A	0	0	0	0	0	0	0	0	f	46	high	1	0	0	0
2616TR1432	1	0	0	0	0	0	0	0	0	0	0	0	0	0	0	0	0	0	0	0	0	0	0	0	0	0	0	0	0	0	0	0	A	0	0	0	0	1	0	0	0	m	66	high	3	0	0	0
2617TR1433	0	0	0	0	0	0	0	0	0	0	0	0	0	0	0	0	0	0	0	1	0	0	0	0	0	0	0	0	0	0	0	0	A	0	0	0	1	0	0	0	1	f	61	high	1	0	0	0
2625TR1445	1	0	0	0	0	0	0	0	0	0	0	0	0	0	0	0	0	0	0	0	0	0	0	0	0	0	0	0	0	0	0	0	N	0	0	0	0	0	0	0	0	f	11	high	0	0	0	0
2629TR1451	1	0	0	0	0	0	0	0	0	0	0	0	0	0	0	0	0	0	0	0	0	0	0	0	0	0	0	0	0	0	0	0	N	0	0	0	0	1	0	0	0	m	53	high	0	0	0	0
2630TR1452	0	0	0	0	0	0	0	0	0	0	0	0	0	1	1	0	0	0	0	0	0	0	0	0	0	0	0	0	0	0	1	0	A	0	0	0	1	1	0	0	0	f	7	high	0	0	0	0
2635TR1459	0	0	0	0	0	0	0	0	0	0	0	0	1	0	0	0	0	0	0	0	0	0	0	0	0	0	0	0	0	0	1	0	A	0	0	0	0	0	0	0	0	m	57	high	1	0	0	0
2636TR1460	0	0	0	1	0	0	0	0	0	0	0	0	0	0	0	0	0	0	0	0	1	1	0	0	0	1	1	0	0	0	1	0	N	0	0	0	0	0	0	0	0	f	51	medium	0	0	0	0
2640TR1853a	1	0	0	0	0	0	0	0	0	0	0	0	0	0	0	0	0	0	0	0	0	0	0	0	0	0	0	0	0	0	0	0	N	1	0	0	1	0	0	0	0	m	60	high	0	0	0	1
2642TR1465	0	0	0	0	0	0	0	0	0	0	0	0	0	0	0	0	0	0	0	0	0	0	1	0	0	0	0	0	1	1	1	0	N	0	0	0	0	0	0	0	0	m	76	high	2	0	0	0
2648TR1472	1	0	0	0	0	0	0	0	0	0	0	0	0	0	0	0	0	0	0	0	0	0	0	0	0	0	0	0	0	0	0	0	N	0	0	0	0	1	0	0	0	m	5	high	0	0	0	0
2652TR1476	0	0	0	0	1	0	0	0	0	0	0	0	1	0	0	0	0	0	0	0	0	0	0	0	0	0	0	1	0	0	0	0	N	0	0	0	0	0	0	0	0	f	9	high	0	0	0	0
2653TR1478	1	0	0	0	0	0	0	0	0	0	0	0	0	0	0	0	0	0	0	0	0	0	0	0	0	0	0	0	0	0	0	0	N	0	0	0	1	0	0	0	0	f	47	high	1	0	0	0
2655TR1484	0	0	0	0	0	0	0	0	0	0	0	0	0	0	1	0	0	0	0	0	0	0	0	0	0	0	0	0	0	0	0	0	N	0	0	0	0	0	0	0	0	m	44	high	0	0	0	0
2666TR1494	1	0	0	0	0	0	0	0	0	0	0	0	0	0	0	0	0	0	0	0	0	0	0	0	0	0	0	0	0	0	0	0	N	0	0	0	0	0	0	0	0	f	7	medium	0	0	0	0
2670TR1496	0	0	0	0	0	0	0	0	0	0	0	0	0	0	0	0	0	0	0	0	0	0	0	0	0	0	0	0	1	0	0	0	N	1	0	0	0	0	0	0	1	m	49	medium	0	0	0	0
2673TR1505	0	0	0	0	0	1	0	0	0	0	0	0	0	0	0	0	0	0	0	0	0	0	1	0	0	0	0	0	0	1	0	0	A	0	0	0	0	0	0	0	0	m	51	medium	1	0	0	0
2681TR1516	1	0	0	0	0	0	0	0	0	0	0	0	0	0	0	0	0	0	0	0	0	0	0	0	0	0	0	0	0	0	0	0	N	0	0	0	0	0	0	0	0	m	75	medium	3	0	0	0
2682TR1517	1	0	0	0	0	0	0	0	0	0	0	0	0	0	0	0	0	0	0	0	0	0	0	0	0	0	0	0	0	0	0	0	N	0	0	0	0	0	0	0	0	m	56	high	0	0	0	0
2683TR1518	0	0	0	0	0	0	0	0	0	0	1	0	0	1	0	0	0	0	0	0	0	0	0	0	0	0	0	0	0	0	0	0	N	0	0	0	0	0	0	0	0	f	68	medium	3	0	0	0
2684TR1519	0	0	0	1	0	0	0	0	0	0	0	0	1	0	0	1	0	0	0	0	0	0	0	0	0	0	0	0	0	0	1	0	N	0	0	0	0	0	0	0	0	m	6	high	0	0	0	0
2688TR1523	1	0	0	0	0	0	0	0	0	0	0	0	0	0	0	0	0	0	0	0	0	0	0	0	0	0	0	0	0	0	0	0	A	0	0	0	0	0	0	0	0	m	56	high	0	0	0	0
2689TR1526	1	0	0	0	0	0	0	0	0	0	0	0	0	0	0	0	0	0	0	0	0	0	0	0	0	0	0	0	0	0	0	0	N	1	0	0	0	0	0	0	1	m	75	high	0	0	0	0
2694TR1531	1	0	0	0	0	0	0	0	0	0	0	0	0	0	0	0	0	0	0	0	0	0	0	0	0	0	0	0	0	0	0	0	N	0	0	0	0	0	0	0	0	f	2	high	0	0	0	0
2696TR1534	0	0	0	0	0	0	0	0	0	0	0	0	0	0	0	0	0	0	0	0	0	0	0	0	0	0	1	0	0	0	0	0	N	0	0	0	1	0	0	0	0	f	56	high	1	0	0	0
2698TR1535	1	0	0	0	0	0	0	0	0	0	0	0	0	0	0	0	0	0	0	0	0	0	0	0	0	0	0	0	0	0	0	0	A	0	0	0	0	0	0	1	0	f	6	high	0	0	0	0
2700TR1536	1	0	0	0	0	0	0	0	0	0	0	0	0	0	0	0	0	0	0	0	0	0	0	0	0	0	0	0	0	0	0	0	N	0	0	0	0	0	0	0	0	f	10	high	2	0	0	0
2701TR1538	0	0	0	0	0	0	0	1	0	0	0	0	0	0	1	0	0	0	1	0	0	0	0	0	0	0	0	0	1	0	0	0	N	0	0	0	0	0	0	0	0	f	32	high	0	0	0	0
2705TR1539	1	0	0	0	0	0	0	0	0	0	0	0	0	0	0	0	0	0	0	0	0	0	0	0	0	0	0	0	0	0	0	0	N	0	0	0	0	0	0	0	0	f	60	high	0	0	0	0
2706TR1542	0	0	0	0	0	0	0	0	0	0	0	0	0	1	0	0	0	0	0	1	0	0	1	0	0	0	0	0	0	0	0	0	A	0	0	0	0	0	0	0	1	f	51	medium	1	0	0	0
2708TR1838	1	0	0	0	0	0	0	0	0	0	0	0	0	0	0	0	0	0	0	0	0	0	0	0	0	0	0	0	0	0	0	0	A	0	0	0	0	0	0	0	0	m	66	high	0	0	0	0
2709TR1546	0	0	0	0	0	1	0	0	0	0	1	0	0	0	0	0	0	0	0	0	1	0	0	0	0	0	0	0	0	0	1	0	N	0	0	0	0	0	0	0	0	f	46	high	1	0	0	0
2714TR1554	1	0	0	0	0	0	0	0	0	0	0	0	0	0	0	0	0	0	0	0	0	0	0	0	0	0	0	0	0	0	0	0	A	0	0	0	0	1	0	0	1	f	55	high	3	1	0	0
2718TR4096a	1	0	0	0	0	0	0	0	0	0	0	0	0	0	0	0	0	0	0	0	0	0	0	0	0	0	0	0	0	0	0	0	N	0	0	0	0	0	0	0	0	m	25	medium	1	0	0	0
2719TR1586	0	0	0	0	0	1	0	0	0	0	0	0	1	0	0	0	1	0	0	0	0	0	0	1	0	1	0	0	1	1	1	0	A	0	0	0	0	0	0	0	1	f	61	medium	1	0	0	0
2723TR5946b	0	0	0	0	0	0	0	0	0	0	0	0	0	0	0	0	0	0	0	0	0	0	0	0	0	0	0	0	0	1	0	0	N	0	0	0	0	0	0	0	0	f	46	high	1	0	0	1
2724TR1569	0	0	0	0	0	0	0	0	0	0	0	0	0	0	0	0	0	0	0	0	0	0	0	0	1	0	0	1	0	0	1	0	N	0	0	0	0	0	0	0	0	f	10	high	0	0	0	0
2726TR1573	0	0	0	0	0	0	1	0	0	0	0	0	0	0	0	0	0	0	0	0	0	0	0	0	0	0	0	0	1	0	0	0	N	0	0	0	0	1	0	0	0	m	41	high	1	0	0	0
2732TR1582	0	0	0	0	0	0	1	0	0	0	0	0	0	0	0	0	0	0	0	0	0	0	0	0	1	0	0	0	0	0	1	0	N	0	0	0	0	0	0	0	0	m	64	high	0	0	0	0
2738TR1589	0	0	0	0	1	0	1	0	0	0	0	0	0	0	0	0	0	0	0	0	0	0	0	0	0	0	0	0	0	0	0	0	N	1	0	0	0	0	0	0	0	m	4	medium	0	0	0	0
2739TR1590	0	0	0	1	0	0	1	0	0	0	0	0	1	1	0	0	0	0	0	0	0	0	0	0	0	0	0	1	0	0	1	0	N	0	0	0	1	0	0	0	0	f	32	high	1	0	0	0
2744TR1593	0	0	0	0	1	0	1	0	0	0	0	0	0	0	0	0	0	0	0	0	0	0	0	0	0	0	0	0	0	0	1	0	N	0	0	0	0	0	0	0	0	f	10	medium	0	0	0	0
2745TR1595	0	0	0	0	0	0	0	0	0	0	0	0	1	0	0	0	0	0	0	0	0	1	1	1	1	0	0	0	0	0	1	0	N	0	1	0	0	0	0	0	0	m	49	high	3	0	0	0
2750TR1602	1	0	0	0	0	0	0	0	0	0	0	0	0	0	0	0	0	0	0	0	0	0	0	0	0	0	0	0	0	0	0	0	A	0	0	0	0	0	0	0	0	f	60	high	2	0	0	0
2754TR1604	0	0	0	0	0	0	0	0	0	0	0	0	0	0	1	0	0	0	0	0	0	1	0	0	0	0	0	0	1	0	0	0	N	0	0	0	0	1	0	0	0	m	9	high	0	0	0	0
2755TR1607	1	0	0	0	0	0	0	0	0	0	0	0	0	0	0	0	0	0	0	0	0	0	0	0	0	0	0	0	0	0	0	0	A	0	0	0	0	0	0	1	0	f	51	high	1	0	0	0
2758TR1609	1	0	0	0	0	0	0	0	0	0	0	0	0	0	0	0	0	0	0	0	0	0	0	0	0	0	0	0	0	0	0	0	N	0	0	0	0	0	1	0	0	m	6	medium	0	0	0	0
2763TR1612	0	0	0	0	0	0	0	0	0	0	0	0	0	0	1	0	0	0	0	0	0	0	0	0	0	0	0	0	0	0	0	0	N	0	0	0	0	0	0	1	0	m	74	medium	1	1	0	0
2777TR1625	0	0	0	0	0	0	0	0	0	0	0	0	0	0	0	0	0	0	0	1	0	0	0	0	0	0	0	1	0	0	0	0	A	1	0	0	0	0	0	0	0	f	50	high	2	0	0	0
2782TR1627	1	0	0	0	0	0	0	0	0	0	0	0	0	0	0	0	0	0	0	0	0	0	0	0	0	0	0	0	0	0	0	0	N	0	0	0	0	1	0	0	0	m	4	medium	1	0	0	0
2796TR1647	1	0	0	0	0	0	0	0	0	0	0	0	0	0	0	0	0	0	0	0	0	0	0	0	0	0	0	0	0	0	0	0	A	0	0	0	1	0	1	0	1	m	51	medium	0	0	0	0
2805TR1652	0	0	0	0	0	0	0	0	0	0	0	0	0	0	0	0	0	0	0	0	0	0	0	0	0	0	0	0	1	0	0	0	N	0	0	0	0	0	0	0	0	f	59	high	0	0	0	0
2814TR1661	1	0	0	0	0	0	0	0	0	0	0	0	0	0	0	0	0	0	0	0	0	0	0	0	0	0	0	0	0	0	0	0	A	0	0	0	0	0	0	0	0	m	46	high	1	0	0	0
2815TR1662	1	0	0	0	0	0	0	0	0	0	0	0	0	0	0	0	0	0	0	0	0	0	0	0	0	0	0	0	0	0	0	0	A	0	0	0	0	0	0	0	1	m	34	high	0	0	0	0
2821TR1668	0	0	0	0	0	0	0	0	0	0	0	0	0	0	0	0	0	0	0	0	0	0	0	0	0	0	0	0	0	0	1	0	N	0	0	0	0	0	0	0	1	m	7	medium	0	0	0	0
2823TR1670	0	0	0	1	0	1	1	0	0	0	1	0	0	0	0	0	1	0	1	0	0	1	1	0	0	1	0	1	1	0	1	0	A	0	0	0	0	0	0	0	1	m	64	medium	6	0	0	0
2826TR1675	0	0	0	0	0	0	0	0	0	1	0	0	0	0	0	1	0	0	0	1	0	0	1	0	0	0	0	0	0	0	0	0	A	0	0	1	1	0	0	0	1	m	30	high	1	0	0	0
2831TR1682	1	0	0	0	0	0	0	0	0	0	0	0	0	0	0	0	0	0	0	0	0	0	0	0	0	0	0	0	0	0	0	0	N	0	0	0	0	0	0	0	1	f	66	low	2	0	0	0
2841TR1690	0	0	0	0	0	0	1	0	0	0	0	0	0	0	0	0	0	0	0	0	0	0	0	0	0	0	0	0	0	0	1	0	N	0	0	0	1	0	0	0	1	m	11	medium	0	0	0	0
2845TR1695	1	0	0	0	0	0	0	0	0	0	0	0	0	0	0	0	0	0	0	0	0	0	0	0	0	0	0	0	0	0	0	0	N	0	0	0	0	0	0	0	0	m	38	high	0	0	0	0
2848TR1700	1	0	0	0	0	0	0	0	0	0	0	0	0	0	0	0	0	0	0	0	0	0	0	0	0	0	0	0	0	0	0	0	N	0	0	0	0	0	0	0	1	m	68	high	1	0	0	0
2853TR1709	1	0	0	0	0	0	0	0	0	0	0	0	0	0	0	0	0	0	0	0	0	0	0	0	0	0	0	0	0	0	0	0	N	0	0	0	0	0	0	0	0	m	39	high	1	0	0	0
2855TR1712	1	0	0	0	0	0	0	0	0	0	0	0	0	0	0	0	0	0	0	0	0	0	0	0	0	0	0	0	0	0	0	0	N	0	0	0	0	0	0	0	0	f	58	medium	0	0	0	0
2856TR1853	1	0	0	0	0	0	0	0	0	0	0	0	0	0	0	0	0	0	0	0	0	0	0	0	0	0	0	0	0	0	0	0	N	0	0	0	1	0	0	0	0	m	10	high	0	0	0	0
2862TR7554	0	0	0	0	0	0	0	0	0	1	0	0	0	0	0	0	0	0	0	0	0	1	0	0	0	0	0	0	0	0	0	0	A	0	0	0	0	0	0	0	1	m	66	high	2	0	0	0
2864TR1720	1	0	0	0	0	0	0	0	0	0	0	0	0	0	0	0	0	0	0	0	0	0	0	0	0	0	0	0	0	0	0	0	N	0	0	0	0	0	0	0	0	f	4	high	0	0	0	0
2866TR1722	1	0	0	0	0	0	0	0	0	0	0	0	0	0	0	0	0	0	0	0	0	0	0	0	0	0	0	0	0	0	0	0	A	0	0	0	0	0	0	0	1	m	15	medium	0	0	0	0
2867TR1723	1	0	0	0	0	0	0	0	0	0	0	0	0	0	0	0	0	0	0	0	0	0	0	0	0	0	0	0	0	0	0	0	A	0	0	0	0	0	0	0	0	m	66	high	1	0	0	0
2871TR1734	0	0	0	1	0	0	0	0	0	0	1	0	0	0	0	1	0	0	0	0	0	0	0	0	0	0	0	0	0	0	1	0	N	0	0	0	0	0	0	0	0	f	8	high	0	0	0	0
2872TR1736	1	0	0	0	0	0	0	0	0	0	0	0	0	0	0	0	0	0	0	0	0	0	0	0	0	0	0	0	0	0	0	0	N	0	0	0	0	0	0	0	0	m	66	low	2	0	0	0
2884TR1750	0	0	0	0	0	0	0	0	0	1	0	0	0	0	1	0	1	0	0	1	0	0	1	1	1	1	0	1	0	1	1	1	A	0	0	0	0	0	0	0	0	f	49	medium	6	0	0	0
2885TR1753	1	0	0	0	0	0	0	0	0	0	0	0	0	0	0	0	0	0	0	0	0	0	0	0	0	0	0	0	0	0	0	0	N	0	0	0	0	0	0	0	0	m	54	high	0	0	0	1
2889TR1757	1	0	0	0	0	0	0	0	0	0	0	0	0	0	0	0	0	0	0	0	0	0	0	0	0	0	0	0	0	0	0	0	N	0	0	0	0	0	0	0	1	f	74	high	1	0	0	0
2903TR1773	0	0	0	0	0	0	0	0	0	0	0	0	0	0	0	0	0	0	0	0	1	0	0	0	0	0	0	0	0	0	0	0	N	0	0	0	0	1	0	0	0	m	4	medium	1	0	0	0
2906TR1776	0	0	0	0	0	0	0	0	0	0	0	0	1	0	0	0	0	0	0	1	0	0	1	0	0	1	0	0	0	0	0	0	A	0	0	0	0	0	0	0	0	m	48	medium	0	0	0	0
2907TR1777	0	0	0	0	0	0	0	0	0	0	0	0	0	0	0	0	0	0	0	0	0	0	0	0	0	1	0	0	0	0	0	0	A	1	0	0	0	0	0	0	0	m	70	medium	1	0	0	0
2908TR1778	0	0	0	0	0	0	0	0	0	0	1	0	0	0	0	1	0	0	0	1	0	0	0	0	0	0	0	0	0	0	1	0	A	0	0	0	0	1	0	0	0	m	29	high	0	0	0	0
2914TR1784	1	0	0	0	0	0	0	0	0	0	0	0	0	0	0	0	0	0	0	0	0	0	0	0	0	0	0	0	0	0	0	0	N	0	0	0	0	0	0	0	1	m	32	medium	0	0	0	0
2916TR1786	1	0	0	0	0	0	0	0	0	0	0	0	0	0	0	0	0	0	0	0	0	0	0	0	0	0	0	0	0	0	0	0	N	0	0	0	0	0	0	0	0	m	45	high	1	0	0	0
2917TR2966	0	0	0	0	0	0	0	0	0	0	0	0	1	1	1	0	0	0	0	0	0	0	0	0	0	0	0	0	0	0	0	0	N	0	0	0	0	0	0	0	0	m	69	high	0	0	0	0
2922TR1792	0	0	0	0	0	0	0	0	0	0	1	0	0	0	1	0	0	0	0	0	0	0	1	1	0	0	0	0	0	1	0	0	N	0	0	0	0	0	0	0	0	m	66	high	1	0	0	0
2929TR1797	0	0	0	1	1	0	1	0	0	0	0	0	1	0	0	0	0	0	1	1	0	0	0	0	0	0	0	0	0	0	1	0	N	0	0	0	0	0	0	0	0	f	42	high	0	0	0	0
2930TR1798	1	0	0	0	0	0	0	0	0	0	0	0	0	0	0	0	0	0	0	0	0	0	0	0	0	0	0	0	0	0	0	0	N	0	0	0	0	0	1	1	0	f	67	high	0	0	0	0
2934TR1800	1	0	0	0	0	0	0	0	0	0	0	0	0	0	0	0	0	0	0	0	0	0	0	0	0	0	0	0	0	0	0	0	N	0	0	0	0	1	0	0	0	f	5	high	0	0	0	0
2936TR1801	1	0	0	0	0	0	0	0	0	0	0	0	0	0	0	0	0	0	0	0	0	0	0	0	0	0	0	0	0	0	0	0	N	0	0	0	0	1	0	0	0	m	5	low	1	0	0	0
2939TR1804	1	0	0	0	0	0	0	0	0	0	0	0	0	0	0	0	0	0	0	0	0	0	0	0	0	0	0	0	0	0	0	0	A	0	0	0	0	0	0	0	0	m	12	high	0	0	0	0
2944TR1808	0	0	0	0	1	0	0	0	0	0	0	0	0	1	0	1	0	0	0	0	0	0	0	0	0	0	0	0	0	0	0	0	N	0	0	0	0	0	0	0	1	f	3	high	0	0	0	0
2945TR1809	1	0	0	0	0	0	0	0	0	0	0	0	0	0	0	0	0	0	0	0	0	0	0	0	0	0	0	0	0	0	0	0	A	0	0	0	0	0	0	1	1	m	30	high	1	0	0	0
2946TR1811	1	0	0	0	0	0	0	0	0	0	0	0	0	0	0	0	0	0	0	0	0	0	0	0	0	0	0	0	0	0	0	0	N	0	0	0	0	0	0	0	0	m	9	high	0	0	0	0
2947TR1812	1	0	0	0	0	0	0	0	0	0	0	0	0	0	0	0	0	0	0	0	0	0	0	0	0	0	0	0	0	0	0	0	N	0	0	0	1	0	0	0	0	f	47	medium	1	0	0	0
2955TR1819	1	0	0	0	0	0	0	0	0	0	0	0	0	0	0	0	0	0	0	0	0	0	0	0	0	0	0	0	0	0	0	0	A	0	0	0	0	1	0	0	0	f	55	medium	1	0	0	0
2959TR1826	1	0	0	0	0	0	0	0	0	0	0	0	0	0	0	0	0	0	0	0	0	0	0	0	0	0	0	0	0	0	0	0	A	0	0	0	0	0	0	0	0	m	45	high	0	0	0	0
2962TR1832	1	0	0	0	0	0	0	0	0	0	0	0	0	0	0	0	0	0	0	0	0	0	0	0	0	0	0	0	0	0	0	0	N	0	0	0	1	0	0	0	0	f	68	high	0	0	0	0
2966TR1834	0	0	0	0	0	0	0	0	0	0	1	0	0	0	0	1	0	0	0	0	0	0	0	0	0	0	0	0	0	0	1	0	A	0	0	0	1	1	0	0	0	f	43	high	0	0	0	0
2969TR1843	1	0	0	0	0	0	0	0	0	0	0	0	0	0	0	0	0	0	0	0	0	0	0	0	0	0	0	0	0	0	0	0	N	0	0	0	0	0	0	0	0	m	60	high	0	0	0	0
2974TR1854	1	0	0	0	0	0	0	0	0	0	0	0	0	0	0	0	0	0	0	0	0	0	0	0	0	0	0	0	0	0	0	0	N	0	0	0	1	0	0	0	0	m	7	high	0	0	0	0
2982TR1857	0	0	0	0	0	0	0	0	0	0	0	0	1	0	0	1	0	0	0	1	0	0	0	0	0	0	0	1	0	0	1	0	N	0	0	0	0	0	0	0	0	f	4	high	0	0	0	0
2983TR1858	0	0	0	0	0	0	0	0	0	0	0	0	0	1	1	1	0	0	0	0	0	0	0	0	0	0	0	0	0	0	1	0	N	0	0	0	0	0	0	0	1	m	3	high	0	0	0	0
2985TR1859	1	0	0	0	0	0	0	0	0	0	0	0	0	0	0	0	0	0	0	0	0	0	0	0	0	0	0	0	0	0	0	0	A	0	0	0	1	0	0	0	0	m	68	high	0	0	0	0
2986TR1860	0	0	0	0	0	0	0	0	0	0	0	0	0	0	0	0	0	0	0	0	0	0	0	0	0	0	0	0	0	0	1	0	N	0	0	0	0	0	0	0	0	f	38	high	0	0	0	0
2987TR1863	1	0	0	0	0	0	0	0	0	0	0	0	0	0	0	0	0	0	0	0	0	0	0	0	0	0	0	0	0	0	0	0	A	1	0	0	0	0	0	0	0	m	61	medium	0	0	0	0
2988TR1865	1	0	0	0	0	0	0	0	0	0	0	0	0	0	0	0	0	0	0	0	0	0	0	0	0	0	0	0	0	0	0	0	N	0	0	0	0	0	0	0	0	f	47	high	0	0	0	0
2999TR1878	1	0	0	0	0	0	0	0	0	0	0	0	0	0	0	0	0	0	0	0	0	0	0	0	0	0	0	0	0	0	0	0	N	0	0	0	0	0	0	0	0	m	58	medium	0	0	0	0
3000TR1883	0	0	0	0	0	0	1	0	0	0	0	0	0	0	0	0	0	0	0	0	0	0	0	0	0	0	1	0	0	0	0	0	A	1	0	0	1	0	0	0	0	f	38	high	1	0	0	0
3003TR1887	1	0	0	0	0	0	0	0	0	0	0	0	0	0	0	0	0	0	0	0	0	0	0	0	0	0	0	0	0	0	0	0	N	0	0	0	0	0	0	0	0	m	11	high	2	0	0	0
3005TR1890	0	0	0	0	0	0	0	0	0	0	1	0	0	1	1	1	0	0	0	0	0	0	0	0	0	0	0	0	0	0	0	0	N	0	0	0	0	0	0	0	0	m	2	high	0	0	0	0
3014TR1899	0	0	0	0	0	0	0	0	0	0	1	0	0	0	0	1	0	0	0	0	0	0	0	0	0	1	0	0	0	0	0	0	A	1	0	0	0	0	0	0	0	m	69	low	0	0	0	0
3018TR1903	0	0	0	0	0	0	0	0	0	0	0	0	0	0	0	1	0	0	0	0	0	0	0	0	0	0	0	0	0	0	0	0	A	0	0	0	0	1	0	0	1	m	71	high	0	0	0	0
3020TR1904	0	0	0	0	0	0	0	0	0	0	0	0	0	0	0	0	0	0	0	0	0	1	0	0	0	0	0	0	0	0	0	0	N	1	0	0	1	1	0	0	0	m	4	high	0	0	0	0
3032TR1919	1	0	0	0	0	0	0	0	0	0	0	0	0	0	0	0	0	0	0	0	0	0	0	0	0	0	0	0	0	0	0	0	N	0	0	0	0	0	0	0	0	m	10	high	0	0	0	0
3036TR1922	0	0	0	0	0	0	0	0	0	0	0	0	0	1	0	0	0	0	0	0	0	0	0	0	0	0	0	0	0	0	1	0	N	0	0	0	0	0	0	0	0	m	9	medium	0	0	0	0
3037TR1924	0	0	0	0	0	0	0	0	0	0	0	0	1	0	0	0	0	0	0	1	1	0	1	0	0	1	0	0	1	1	1	0	N	0	0	0	0	0	1	0	0	f	56	high	2	0	0	0
3039TR1926	0	0	0	0	0	0	1	1	1	0	0	0	1	0	0	0	0	0	1	0	0	0	0	0	0	0	0	0	1	0	0	0	A	1	0	0	1	1	0	0	1	f	49	high	1	0	0	0
3040TR4931a	1	0	0	0	0	0	0	0	0	0	0	0	0	0	0	0	0	0	0	0	0	0	0	0	0	0	0	0	0	0	0	0	A	0	0	0	0	0	0	0	1	m	46	medium	0	0	0	0
3042TR1928	1	0	0	0	0	0	0	0	0	0	0	0	0	0	0	0	0	0	0	0	0	0	0	0	0	0	0	0	0	0	0	0	A	0	0	0	1	0	0	0	0	m	61	medium	3	0	0	0
3051TR1936	1	0	0	0	0	0	0	0	0	0	0	0	0	0	0	0	0	0	0	0	0	0	0	0	0	0	0	0	0	0	0	0	N	0	0	0	0	0	0	0	0	m	40	medium	0	0	0	0
3058TR7285	1	0	0	0	0	0	0	0	0	0	0	0	0	0	0	0	0	0	0	0	0	0	0	0	0	0	0	0	0	0	0	0	N	0	0	0	0	0	0	0	0	f	20	medium	1	0	0	0
3059TR1942	0	0	0	0	1	0	0	0	0	0	0	0	1	0	0	0	0	0	0	0	0	0	0	0	0	0	0	1	0	0	0	0	A	0	0	0	0	0	0	0	1	f	21	medium	2	0	0	0
3067TR1952	0	0	0	0	0	0	0	0	0	0	0	0	0	0	0	1	0	0	0	0	0	1	0	0	0	0	0	0	0	0	0	0	N	0	0	0	0	1	0	0	0	m	14	high	0	0	0	0
3068TR1953	0	0	0	0	0	0	0	0	0	0	0	0	0	0	0	0	0	0	0	0	0	0	0	0	1	0	0	1	0	0	0	0	N	0	0	0	0	0	0	0	0	f	40	medium	5	0	0	0
3069TR1955	1	0	0	0	0	0	0	0	0	0	0	0	0	0	0	0	0	0	0	0	0	0	0	0	0	0	0	0	0	0	0	0	N	0	0	0	1	0	0	0	0	m	28	medium	0	0	0	0
3070TR1956	0	0	0	0	0	0	0	0	0	1	0	0	0	0	0	0	0	0	0	0	0	0	0	1	0	0	0	0	0	0	0	0	N	0	0	0	0	0	0	0	0	f	47	high	0	0	0	0
3071TR1957	0	0	0	0	0	0	1	0	0	0	1	0	1	0	0	0	0	0	0	0	0	0	0	0	0	0	0	0	0	0	0	0	N	0	0	0	0	1	0	0	0	f	46	high	1	0	0	0
3074TR1961	0	0	0	0	0	0	0	1	0	0	0	0	1	0	1	0	0	0	0	0	0	0	0	1	0	0	0	0	0	1	1	0	N	0	0	0	0	0	0	0	0	f	17	high	2	0	0	0
3079TR1968	0	0	0	1	1	0	0	1	0	0	1	0	1	0	0	1	1	0	1	0	0	0	0	1	0	1	0	0	0	0	1	0	N	1	1	0	0	0	0	0	0	f	34	medium	0	0	0	0
3083TR1972	0	0	0	1	0	0	0	0	0	0	1	0	1	0	0	1	0	0	0	0	0	0	0	0	0	0	0	0	0	0	0	0	A	0	0	0	0	0	0	0	0	m	29	high	0	0	0	0
3085TR1979	1	0	0	0	0	0	0	0	0	0	0	0	0	0	0	0	0	0	0	0	0	0	0	0	0	0	0	0	0	0	0	0	A	0	0	0	0	0	0	0	0	m	57	high	0	0	0	0
3092TR1984	0	0	0	1	0	1	0	1	0	0	0	0	0	0	0	0	1	0	0	0	0	0	1	0	0	0	0	1	0	0	1	0	A	0	0	0	0	0	0	0	0	m	57	high	3	0	0	0
3096TR1989	0	0	0	0	0	0	0	0	0	0	0	0	1	0	0	0	0	0	0	0	0	0	0	0	0	0	0	0	0	0	0	0	N	0	0	0	0	0	0	0	0	m	65	high	2	0	0	0
3100TR1993	1	0	0	0	0	0	0	0	0	0	0	0	0	0	0	0	0	0	0	0	0	0	0	0	0	0	0	0	0	0	0	0	N	0	0	0	1	0	0	0	0	m	12	high	0	0	0	0
3101TR1994	1	0	0	0	0	0	0	0	0	0	0	0	0	0	0	0	0	0	0	0	0	0	0	0	0	0	0	0	0	0	0	0	N	0	0	0	0	1	0	0	0	m	10	high	0	0	0	0
3103TR1996	0	0	0	0	0	0	0	0	0	0	0	0	0	0	1	0	0	0	0	0	0	0	0	0	0	0	0	0	0	0	0	0	N	0	0	0	0	0	0	0	0	m	33	high	0	0	0	1
3104TR1998	0	0	0	0	0	0	0	0	0	0	0	0	0	0	0	0	0	0	0	0	0	1	0	0	0	0	0	0	0	0	0	0	N	0	0	0	0	1	0	0	0	f	39	high	1	0	0	0
3107TR2002	0	0	0	1	0	0	0	0	0	0	0	0	1	0	0	0	0	0	0	0	0	0	0	0	1	0	0	1	0	0	1	0	N	0	0	0	1	0	0	0	0	f	43	high	0	0	0	0
3109TR2003	1	0	0	0	0	0	0	0	0	0	0	0	0	0	0	0	0	0	0	0	0	0	0	0	0	0	0	0	0	0	0	0	N	0	0	0	0	0	0	0	0	m	4	high	0	0	0	0
3114TR2010	1	0	0	0	0	0	0	0	0	0	0	0	0	0	0	0	0	0	0	0	0	0	0	0	0	0	0	0	0	0	0	0	N	1	0	0	0	1	0	0	0	f	36	high	0	0	0	0
3115TR2015	1	0	0	0	0	0	0	0	0	0	0	0	0	0	0	0	0	0	0	0	0	0	0	0	0	0	0	0	0	0	0	0	A	0	0	0	0	0	0	0	0	m	55	high	0	0	0	0
3119TR2020	1	0	0	0	0	0	0	0	0	0	0	0	0	0	0	0	0	0	0	0	0	0	0	0	0	0	0	0	0	0	0	0	A	0	0	0	0	0	0	0	0	m	57	medium	3	0	0	0
3121TR2024	0	0	0	0	0	0	0	0	0	0	0	0	0	0	0	1	0	0	0	0	0	0	0	0	0	0	0	0	0	0	0	0	N	0	0	0	1	0	0	0	0	f	0	medium	0	0	0	0
3125TR2035	0	0	0	0	0	0	1	0	0	1	0	0	1	0	0	0	0	0	0	1	0	0	0	0	0	0	0	0	0	0	0	0	N	0	0	0	1	0	0	0	0	m	55	medium	0	0	0	0
3126TR2036	1	0	0	0	0	0	0	0	0	0	0	0	0	0	0	0	0	0	0	0	0	0	0	0	0	0	0	0	0	0	0	0	N	0	0	0	0	1	0	0	0	f	40	medium	0	0	0	0
3129TR2039	1	0	0	0	0	0	0	0	0	0	0	0	0	0	0	0	0	0	0	0	0	0	0	0	0	0	0	0	0	0	0	0	A	0	0	0	0	0	0	0	0	m	4	low	0	0	0	0
3137TR2051	0	0	0	0	0	0	0	0	0	0	1	0	0	0	0	0	0	0	0	0	0	0	0	0	0	0	0	0	0	0	0	0	N	0	0	0	0	0	0	0	0	f	58	high	0	0	0	0
3139TR2055	0	0	0	0	0	0	0	0	0	0	0	1	0	1	1	0	0	0	0	0	0	0	0	1	0	1	1	0	1	0	1	1	N	0	0	0	0	0	0	0	0	m	48	high	1	0	0	0
3142TR2081	1	0	0	0	0	0	0	0	0	0	0	0	0	0	0	0	0	0	0	0	0	0	0	0	0	0	0	0	0	0	0	0	A	0	0	1	1	0	0	0	1	f	38	medium	1	0	0	0
3148TR2064	1	0	0	0	0	0	0	0	0	0	0	0	0	0	0	0	0	0	0	0	0	0	0	0	0	0	0	0	0	0	0	0	N	0	0	0	0	0	0	0	0	m	38	medium	1	0	0	0
3156TR2074	0	0	0	0	0	0	0	0	0	0	0	0	0	0	0	0	0	0	0	0	0	0	0	1	0	0	0	0	0	0	0	0	N	0	0	0	0	0	0	0	0	f	53	medium	0	0	0	0
3159TR2079	1	0	0	0	0	0	0	0	0	0	0	0	0	0	0	0	0	0	0	0	0	0	0	0	0	0	0	0	0	0	0	0	N	0	0	0	0	1	0	0	0	m	3	high	0	0	0	0
3167TR2088	1	0	0	0	0	0	0	0	0	0	0	0	0	0	0	0	0	0	0	0	0	0	0	0	0	0	0	0	0	0	0	0	N	0	0	0	1	0	0	0	0	f	56	medium	0	0	0	0
3169TR2091	1	0	0	0	0	0	0	0	0	0	0	0	0	0	0	0	0	0	0	0	0	0	0	0	0	0	0	0	0	0	0	0	N	0	0	0	0	1	0	0	0	f	7	high	0	0	0	0
3173TR4127	1	0	0	0	0	0	0	0	0	0	0	0	0	0	0	0	0	0	0	0	0	0	0	0	0	0	0	0	0	0	0	0	N	0	0	0	0	0	0	0	0	m	9	high	0	0	0	0
3175TR2094	1	0	0	0	0	0	0	0	0	0	0	0	0	0	0	0	0	0	0	0	0	0	0	0	0	0	0	0	0	0	0	0	N	0	0	0	0	0	0	0	0	m	4	medium	0	0	0	0
3184TR2104	0	0	0	0	0	0	0	0	0	0	0	0	1	0	0	0	0	0	1	0	0	0	0	0	0	0	0	0	0	0	1	0	A	0	0	0	0	1	0	0	1	m	12	high	0	0	0	0
3187TR2106	0	0	0	0	0	0	0	0	0	0	1	0	1	0	0	0	0	0	0	0	0	0	1	1	0	1	0	1	1	0	1	0	A	0	0	0	0	0	0	0	0	f	37	medium	1	0	0	0
3201TR2131	1	0	0	0	0	0	0	0	0	0	0	0	0	0	0	0	0	0	0	0	0	0	0	0	0	0	0	0	0	0	0	0	A	0	0	0	1	0	0	0	1	m	3	high	0	0	0	0
3202TR2132	1	0	0	0	0	0	0	0	0	0	0	0	0	0	0	0	0	0	0	0	0	0	0	0	0	0	0	0	0	0	0	0	N	0	0	0	0	0	0	0	0	f	57	high	0	0	0	0
3208TR2780a	0	0	0	0	0	1	0	0	0	0	1	0	0	0	0	0	0	0	0	0	0	0	0	1	0	0	0	0	0	0	1	0	N	0	0	0	0	1	0	0	1	f	29	medium	3	0	0	1
3210TR2142	1	0	0	0	0	0	0	0	0	0	0	0	0	0	0	0	0	0	0	0	0	0	0	0	0	0	0	0	0	0	0	0	N	0	0	0	0	0	0	0	0	m	7	high	0	0	0	0
3222TR2159	0	0	0	0	0	1	1	0	0	0	0	0	0	0	1	0	0	0	0	0	0	0	0	0	0	0	0	0	1	0	1	0	N	0	0	0	0	0	0	0	0	f	35	high	1	0	0	0
3230TR2173	0	0	0	0	0	1	0	0	0	0	0	0	0	0	0	0	0	0	0	0	0	0	0	0	0	0	0	0	0	0	1	0	N	0	0	0	1	0	0	0	0	f	46	high	0	0	0	1
3231TR2174	0	0	0	0	0	0	1	0	0	0	0	0	0	0	0	0	0	0	0	0	1	0	0	0	0	0	0	0	0	0	1	0	A	0	0	0	0	0	0	0	0	m	68	medium	2	0	0	0
3236TR2180	0	0	0	0	0	0	0	0	0	0	0	0	0	0	0	0	0	0	0	0	0	0	1	0	0	0	0	0	0	0	1	0	A	0	0	0	1	0	0	0	0	f	41	high	2	0	0	0
3237TR2183	1	0	0	0	0	0	0	0	0	0	0	0	0	0	0	0	0	0	0	0	0	0	0	0	0	0	0	0	0	0	0	0	A	0	0	0	1	0	0	0	0	m	47	high	2	0	0	0
3241TR2191	0	0	0	0	0	0	0	0	0	0	0	0	0	0	0	0	0	0	0	0	0	0	1	0	0	0	0	0	0	1	0	0	N	0	0	0	0	1	0	0	0	f	66	high	1	0	0	0
3254TR2209	0	0	0	0	0	0	0	0	0	0	0	0	0	0	0	0	0	0	0	1	0	0	1	0	0	0	1	0	0	0	1	0	N	0	0	0	0	0	0	0	0	f	60	low	0	0	0	0
3255TR6729	1	0	0	0	0	0	0	0	0	0	0	0	0	0	0	0	0	0	0	0	0	0	0	0	0	0	0	0	0	0	0	0	N	0	0	0	0	1	1	0	0	f	36	high	1	0	0	0
3258TR2214	0	0	0	0	0	0	0	0	0	0	0	0	1	0	0	0	0	0	0	0	0	0	0	0	0	0	0	0	0	0	0	0	A	0	0	0	0	0	0	0	0	f	5	medium	1	0	0	0
3265TR2223	1	0	0	0	0	0	0	0	0	0	0	0	0	0	0	0	0	0	0	0	0	0	0	0	0	0	0	0	0	0	0	0	N	0	0	0	0	1	0	0	0	m	1	low	0	0	0	0
3268TR2228	0	0	0	0	0	0	0	0	0	0	0	0	0	0	0	0	0	0	0	0	1	0	0	0	0	0	0	0	0	0	0	0	N	0	0	0	0	0	0	0	1	m	26	high	0	0	0	0
3270TR2231	0	0	0	0	0	1	0	1	0	0	0	0	0	0	0	0	0	0	1	0	0	0	1	0	0	0	0	0	0	1	1	1	N	0	0	0	0	0	0	0	0	f	41	medium	1	0	0	0
3276TR2236	1	0	0	0	0	0	0	0	0	0	0	0	0	0	0	0	0	0	0	0	0	0	0	0	0	0	0	0	0	0	0	0	N	0	0	0	1	0	0	0	0	m	36	high	0	0	0	0
3285TR2245	1	0	0	0	0	0	0	0	0	0	0	0	0	0	0	0	0	0	0	0	0	0	0	0	0	0	0	0	0	0	0	0	N	0	0	0	0	0	0	0	1	f	14	high	0	0	0	0
3286TR2246	0	0	0	0	0	0	0	0	0	0	0	0	0	1	1	0	0	0	0	0	1	0	0	0	0	0	0	0	0	1	0	0	A	0	0	0	1	0	0	0	1	m	54	high	2	0	0	0
3290TR2253	1	0	0	0	0	0	0	0	0	0	0	0	0	0	0	0	0	0	0	0	0	0	0	0	0	0	0	0	0	0	0	0	A	0	0	0	0	0	0	0	1	f	5	high	0	0	0	0
3291TR2255	1	0	0	0	0	0	0	0	0	0	0	0	0	0	0	0	0	0	0	0	0	0	0	0	0	0	0	0	0	0	0	0	A	1	0	0	0	0	0	0	1	m	7	high	0	0	0	0
3292TR2256	1	0	0	0	0	0	0	0	0	0	0	0	0	0	0	0	0	0	0	0	0	0	0	0	0	0	0	0	0	0	0	0	N	0	0	0	0	1	0	0	0	m	41	medium	1	0	0	0
3299TR2265	1	0	0	0	0	0	0	0	0	0	0	0	0	0	0	0	0	0	0	0	0	0	0	0	0	0	0	0	0	0	0	0	N	0	0	0	0	0	0	1	0	m	9	high	0	0	0	0
3302TR2270	1	0	0	0	0	0	0	0	0	0	0	0	0	0	0	0	0	0	0	0	0	0	0	0	0	0	0	0	0	0	0	0	N	0	0	0	1	0	0	0	0	f	44	high	1	0	0	0
3303TR2272	0	0	0	0	0	0	0	0	0	0	0	0	0	0	0	0	0	0	0	0	0	0	0	0	0	0	0	0	0	0	1	0	N	0	0	0	0	0	0	0	0	m	62	high	0	0	0	0
3307TR2276	0	0	0	0	0	0	1	0	0	0	0	0	0	0	0	0	0	0	0	0	0	0	0	0	0	0	0	0	0	1	0	0	A	0	0	0	0	1	0	0	0	f	68	high	0	0	0	0
3308TR2278	1	0	0	0	0	0	0	0	0	0	0	0	0	0	0	0	0	0	0	0	0	0	0	0	0	0	0	0	0	0	0	0	A	0	0	0	0	1	0	1	0	f	69	medium	2	0	0	0
3309TR2277	0	0	0	0	0	0	0	0	0	0	0	1	0	0	0	0	0	0	0	0	0	0	0	0	0	0	0	0	0	0	0	0	A	0	0	0	0	0	1	0	1	m	66	medium	2	0	0	0
3339TR2315	1	0	0	0	0	0	0	0	0	0	0	0	0	0	0	0	0	0	0	0	0	0	0	0	0	0	0	0	0	0	0	0	N	0	0	0	0	1	0	0	0	m	9	medium	0	0	0	0
3340TR2316	0	0	1	0	0	0	0	1	0	0	0	0	0	0	0	0	0	0	1	0	0	0	1	0	0	0	0	0	1	0	0	0	N	0	0	0	0	1	0	1	1	f	49	medium	1	0	0	0
3344TR2318	1	0	0	0	0	0	0	0	0	0	0	0	0	0	0	0	0	0	0	0	0	0	0	0	0	0	0	0	0	0	0	0	N	0	0	0	0	0	0	0	0	m	8	high	0	0	0	0
3354TR2327	0	0	0	0	1	0	0	0	0	0	0	0	0	0	0	0	0	0	0	0	0	0	0	0	0	0	0	0	0	0	0	0	N	0	0	0	1	0	1	0	0	f	14	high	0	0	0	0
3376TR2362	0	0	0	0	0	1	0	0	0	0	0	0	0	1	0	0	0	0	0	1	0	0	0	0	0	0	0	0	0	0	1	0	N	0	0	0	1	0	0	0	0	m	49	high	0	0	0	0
3379TR5087b	1	0	0	0	0	0	0	0	0	0	0	0	0	0	0	0	0	0	0	0	0	0	0	0	0	0	0	0	0	0	0	0	N	0	0	0	0	0	0	0	0	m	62	high	1	0	0	1
3383TR2371	1	0	0	0	0	0	0	0	0	0	0	0	0	0	0	0	0	0	0	0	0	0	0	0	0	0	0	0	0	0	0	0	N	0	0	0	1	0	0	0	0	f	5	medium	0	0	0	0
3395TR2385	1	0	0	0	0	0	0	0	0	0	0	0	0	0	0	0	0	0	0	0	0	0	0	0	0	0	0	0	0	0	0	0	N	0	0	0	0	1	0	0	0	m	62	high	0	0	0	0
3403TR2396	0	0	0	0	0	1	0	0	0	0	0	0	0	0	0	0	0	0	0	1	0	0	0	0	0	0	0	0	0	0	1	0	N	0	0	0	0	1	0	0	0	f	59	high	0	0	0	0
3405TR2397	1	0	0	0	0	0	0	0	0	0	0	0	0	0	0	0	0	0	0	0	0	0	0	0	0	0	0	0	0	0	0	0	N	0	0	0	0	0	0	0	0	m	10	high	0	0	0	0
3406TR2399	1	0	0	0	0	0	0	0	0	0	0	0	0	0	0	0	0	0	0	0	0	0	0	0	0	0	0	0	0	0	0	0	N	0	0	1	0	1	0	0	1	m	64	medium	1	0	0	0
3408TR2400	1	0	0	0	0	0	0	0	0	0	0	0	0	0	0	0	0	0	0	0	0	0	0	0	0	0	0	0	0	0	0	0	N	0	0	0	0	0	0	0	0	f	9	high	0	0	0	0
3409TR2403	1	0	0	0	0	0	0	0	0	0	0	0	0	0	0	0	0	0	0	0	0	0	0	0	0	0	0	0	0	0	0	0	A	0	0	0	0	0	0	0	0	m	39	high	0	0	0	0
3413TR2407	0	0	0	0	0	0	0	1	0	0	0	0	0	1	0	0	0	0	0	0	0	0	0	0	0	0	0	0	0	0	1	0	N	0	0	0	0	0	0	0	0	f	41	high	0	0	0	0
3420TR2414	0	0	0	1	0	0	0	0	0	0	0	0	1	0	0	0	0	0	1	0	0	0	0	0	0	0	0	0	0	0	0	0	N	0	0	0	0	0	0	0	0	f	42	high	0	0	0	0
3421TR2415	0	0	0	0	0	0	0	1	0	0	0	0	0	0	0	0	0	0	0	0	0	0	1	1	0	0	1	0	0	0	1	0	N	0	1	0	0	0	0	0	0	m	47	medium	1	0	0	0
3424TR2419	0	0	0	0	0	0	0	0	0	0	0	0	0	0	0	0	0	0	0	0	0	0	0	0	0	0	0	0	0	0	1	0	N	1	0	0	0	1	0	0	0	m	4	high	0	0	0	0
3425TR2422	0	0	0	0	0	0	0	0	0	0	1	0	0	0	0	1	0	0	0	0	0	0	0	0	0	0	0	0	0	0	0	0	A	0	0	0	0	0	0	0	0	f	46	medium	1	0	0	0
3426TR2425	0	0	0	0	0	0	0	0	0	0	0	0	0	0	0	0	0	0	0	0	0	0	0	0	0	0	0	0	0	0	0	0	N	0	0	0	0	0	0	0	0	m	30	medium	9	0	0	0
3427TR2426	1	0	0	0	0	0	0	0	0	0	0	0	0	0	0	0	0	0	0	0	0	0	0	0	0	0	0	0	0	0	0	0	N	0	0	0	0	0	0	0	0	f	60	high	0	0	0	0
3432TR2435	1	0	0	0	0	0	0	0	0	0	0	0	0	0	0	0	0	0	0	0	0	0	0	0	0	0	0	0	0	0	0	0	A	0	0	0	0	0	0	0	0	m	59	high	0	1	0	0
3435TR2438	1	0	0	0	0	0	0	0	0	0	0	0	0	0	0	0	0	0	0	0	0	0	0	0	0	0	0	0	0	0	0	0	A	0	0	0	0	0	0	0	0	f	51	medium	0	0	0	0
3436TR2441	1	0	0	0	0	0	0	0	0	0	0	0	0	0	0	0	0	0	0	0	0	0	0	0	0	0	0	0	0	0	0	0	N	0	0	0	0	0	0	0	0	f	68	high	0	0	0	0
3437TR2445	0	0	0	0	0	0	0	1	0	0	0	0	0	0	0	0	0	0	0	0	1	0	0	0	0	0	0	0	1	0	0	0	A	0	0	0	0	0	1	1	0	m	63	high	1	0	0	0
3438TR2443	1	0	0	0	0	0	0	0	0	0	0	0	0	0	0	0	0	0	0	0	0	0	0	0	0	0	0	0	0	0	0	0	A	0	0	0	0	0	0	0	0	f	55	high	1	0	0	0
3440TR2448	0	0	0	1	0	1	1	1	0	0	1	0	1	0	0	1	0	0	0	1	0	0	0	0	0	0	0	0	0	1	1	0	A	0	0	0	0	0	0	0	0	m	33	high	0	0	0	0
3441TR2449	1	0	0	0	0	0	0	0	0	0	0	0	0	0	0	0	0	0	0	0	0	0	0	0	0	0	0	0	0	0	0	0	N	0	0	0	0	0	0	0	0	f	50	high	0	0	0	0
3446TR2456	1	0	0	0	0	0	0	0	0	0	0	0	0	0	0	0	0	0	0	0	0	0	0	0	0	0	0	0	0	0	0	0	N	0	0	0	1	0	0	0	0	f	67	high	0	0	0	0
3450TR2463	1	0	0	0	0	0	0	0	0	0	0	0	0	0	0	0	0	0	0	0	0	0	0	0	0	0	0	0	0	0	0	0	A	1	0	0	0	0	0	0	0	m	8	low	0	0	0	0
3451TR4063	0	1	0	1	0	1	0	1	0	0	0	0	1	0	0	0	0	0	0	1	1	0	0	1	0	0	0	0	1	0	1	0	N	0	0	0	0	0	0	0	0	f	59	high	0	0	0	0
3453TR2465	0	0	0	0	0	0	0	0	0	0	0	0	0	0	0	0	1	0	0	0	0	0	1	1	0	1	0	0	0	0	0	0	N	0	0	0	0	0	0	0	0	f	69	low	0	0	0	0
3455TR2466	1	0	0	0	0	0	0	0	0	0	0	0	0	0	0	0	0	0	0	0	0	0	0	0	0	0	0	0	0	0	0	0	N	0	0	0	0	0	1	0	0	m	9	medium	0	0	0	0
3456TR2469	1	0	0	0	0	0	0	0	0	0	0	0	0	0	0	0	0	0	0	0	0	0	0	0	0	0	0	0	0	0	0	0	N	0	0	0	0	0	0	0	0	m	5	high	0	0	0	0
3468TR2485	0	0	0	0	0	0	0	0	0	0	0	0	0	0	0	0	0	0	0	0	0	0	0	1	1	0	0	0	0	0	1	0	N	0	0	0	1	0	0	0	1	m	67	high	3	0	0	1	1
3475TR2493	0	0	0	0	0	0	0	0	0	0	0	0	0	0	0	0	0	0	0	0	0	0	1	0	0	0	0	0	0	0	0	0	N	0	0	0	1	0	0	0	0	f	58	medium	2	0	0	0
3477TR3786a	0	1	0	0	0	0	0	0	0	1	0	0	0	0	1	0	0	0	0	1	0	1	1	0	1	1	1	1	0	0	0	0	N	0	0	0	0	0	0	1	0	f	56	high	3	1	0	1
3479TR2497	0	0	0	0	0	0	0	0	0	0	0	0	1	0	0	0	0	0	0	0	0	0	0	0	0	0	0	0	1	0	0	0	N	0	0	0	0	0	0	0	0	f	45	high	0	0	0	0
3486TR2503	0	0	0	0	0	1	1	0	0	0	0	0	0	0	0	0	0	0	0	1	0	0	1	0	0	0	0	0	1	0	1	0	A	0	0	0	0	0	0	0	0	f	51	high	0	0	0	0
3489TR2505	0	0	0	0	0	0	0	0	0	0	1	0	1	1	0	0	0	0	0	0	0	0	0	0	0	1	0	0	0	0	1	0	N	0	0	0	0	0	0	0	0	f	33	high	0	0	0	0
3491TR2507	0	0	0	0	0	0	0	0	0	0	1	0	0	0	0	0	0	0	0	0	0	0	0	0	0	1	0	0	0	0	1	0	A	0	0	0	0	0	0	0	0	m	71	medium	3	0	0	1
3496TR2515	1	0	0	0	0	0	0	0	0	0	0	0	0	0	0	0	0	0	0	0	0	0	0	0	0	0	0	0	0	0	0	0	N	0	0	0	0	0	0	0	0	f	8	high	0	0	0	1
3502TR2520	1	0	0	0	0	0	0	0	0	0	0	0	0	0	0	0	0	0	0	0	0	0	0	0	0	0	0	0	0	0	0	0	N	0	0	0	0	1	0	0	0	f	47	medium	0	0	0	0
3503TR2521	1	0	0	0	0	0	0	0	0	0	0	0	0	0	0	0	0	0	0	0	0	0	0	0	0	0	0	0	0	0	0	0	N	0	0	0	0	0	0	0	0	m	71	high	0	0	0	0
3505TR2524	1	0	0	0	0	0	0	0	0	0	0	0	0	0	0	0	0	0	0	0	0	0	0	0	0	0	0	0	0	0	0	0	A	1	0	0	1	1	0	0	1	f	59	high	0	0	0	0
3508TR2527	0	0	0	0	0	0	0	0	0	0	0	0	0	0	0	0	0	0	0	0	1	0	0	1	0	0	0	0	0	0	0	0	N	0	0	0	0	0	0	0	0	f	66	medium	0	0	0	0
3510TR2531	1	0	0	0	0	0	0	0	0	0	0	0	0	0	0	0	0	0	0	0	0	0	0	0	0	0	0	0	0	0	0	0	N	0	0	0	0	0	0	0	0	m	10	medium	0	0	0	0
3515TR2534	1	0	0	0	0	0	0	0	0	0	0	0	0	0	0	0	0	0	0	0	0	0	0	0	0	0	0	0	0	0	0	0	A	0	0	0	1	0	0	0	0	m	50	medium	1	0	0	0
3523TR2539	1	0	0	0	0	0	0	0	0	0	0	0	0	0	0	0	0	0	0	0	0	0	0	0	0	0	0	0	0	0	0	0	N	0	0	0	0	0	0	0	0	m	46	high	1	0	0	0
3527TR2101b	1	0	0	0	0	0	0	0	0	0	0	0	0	0	0	0	0	0	0	0	0	0	0	0	0	0	0	0	0	0	0	0	A	0	0	0	0	0	0	0	0	m	72	medium	1	0	0	1
3530TR2548	0	0	0	0	0	0	0	0	0	0	0	0	1	0	0	0	0	0	0	0	0	0	0	0	0	0	0	0	0	0	0	0	A	0	0	0	0	0	0	0	1	f	60	high	2	0	0	0
3550TR2920	1	0	0	0	0	0	0	0	0	0	0	0	0	0	0	0	0	0	0	0	0	0	0	0	0	0	0	0	0	0	0	0	N	0	0	0	0	1	0	0	0	f	35	high	1	0	0	0
3552TR2575	0	0	0	0	0	0	0	0	0	0	1	0	0	0	0	0	0	0	0	0	0	0	0	0	0	0	0	0	0	0	0	0	N	0	0	0	0	1	0	0	1	m	6	medium	0	0	0	0
3568TR2603	1	0	0	0	0	0	0	0	0	0	0	0	0	0	0	0	0	0	0	0	0	0	0	0	0	0	0	0	0	0	0	0	N	0	0	0	0	0	0	0	1	m	67	medium	1	0	0	0
3584TR2619	1	0	0	0	0	0	0	0	0	0	0	0	0	0	0	0	0	0	0	0	0	0	0	0	0	0	0	0	0	0	0	0	N	0	0	0	0	0	0	0	1	f	48	high	0	0	0	0
3590TR2627	1	0	0	0	0	0	0	0	0	0	0	0	0	0	0	0	0	0	0	0	0	0	0	0	0	0	0	0	0	0	0	0	N	0	0	0	0	0	0	0	0	m	67	high	1	0	0	0
3594TR4027	0	0	0	0	0	0	0	0	0	1	0	0	0	0	0	0	1	0	1	0	0	1	1	1	0	1	0	1	1	1	1	1	N	0	0	0	0	0	0	0	0	m	59	medium	1	0	0	0
3604TR2643	0	0	0	0	0	0	0	0	0	0	0	0	0	0	1	0	0	0	1	1	0	0	1	0	0	0	0	0	0	0	0	0	N	0	0	0	1	0	0	0	1	m	78	high	3	0	0	0
3609TR2649	1	0	0	0	0	0	0	0	0	0	0	0	0	0	0	0	0	0	0	0	0	0	0	0	0	0	0	0	0	0	0	0	A	0	0	0	0	0	0	0	1	f	77	high	1	0	0	0
3618TR4601a	1	0	0	0	0	0	0	0	0	0	0	0	0	0	0	0	0	0	0	0	0	0	0	0	0	0	0	0	0	0	0	0	N	0	0	0	0	0	0	0	0	m	62	high	0	0	0	1
3620TR2664	0	0	0	0	0	0	0	0	0	0	1	0	0	0	0	0	0	0	0	0	0	0	0	0	0	0	0	0	0	0	1	0	N	0	0	0	0	0	0	0	0	m	26	high	0	0	0	0
3628TR2671	0	0	0	0	0	0	0	0	0	0	1	1	0	0	0	0	0	0	0	0	0	0	0	0	0	0	0	0	0	0	0	0	N	0	0	0	0	0	0	0	0	m	77	high	0	0	0	0
3644TR3561	1	0	0	0	0	0	0	0	0	0	0	0	0	0	0	0	0	0	0	0	0	0	0	0	0	0	0	0	0	0	0	0	N	0	0	0	0	0	1	0	0	f	5	high	0	0	0	0
3668TR2735	1	0	0	0	0	0	0	0	0	0	0	0	0	0	0	0	0	0	0	0	0	0	0	0	0	0	0	0	0	0	0	0	N	0	0	0	0	0	1	1	1	f	66	medium	4	0	0	0
3669TR2728	0	0	0	0	0	0	0	0	0	0	1	1	1	0	0	0	0	0	0	0	0	0	0	0	0	0	0	0	0	1	0	0	N	0	0	0	0	0	0	0	0	f	68	high	5	0	0	1
3672TR2740	0	0	0	1	0	0	1	0	0	0	1	0	0	0	0	0	0	0	0	0	0	0	0	0	0	0	0	0	0	0	0	0	N	0	0	0	0	0	0	0	0	m	29	high	0	0	0	1	1
3679TR1251b	0	0	0	0	0	0	0	0	0	0	0	0	0	0	0	0	0	0	0	1	0	0	1	0	0	0	0	0	0	0	0	0	A	0	0	0	1	0	0	0	1	f	57	medium	0	0	0	0
3706TR2764	0	0	0	0	0	0	0	0	0	0	0	0	0	0	0	0	0	0	0	0	0	0	0	0	0	1	0	0	0	0	0	0	N	0	0	0	0	0	0	0	0	m	52	high	1	0	0	0
3708TR3083b	0	0	0	0	0	0	0	0	0	0	0	0	0	1	1	0	0	0	0	0	0	0	0	0	0	0	0	0	0	0	0	0	N	0	0	0	1	1	0	0	0	f	49	medium	0	0	0	0
3726TR2800	1	0	0	0	0	0	0	0	0	0	0	0	0	0	0	0	0	0	0	0	0	0	0	0	0	0	0	0	0	0	0	0	N	0	0	0	0	1	0	0	0	f	73	medium	0	1	0	0
3729TR2801	0	0	0	0	0	0	0	0	0	0	0	0	0	0	0	0	0	0	0	0	0	0	0	0	0	0	0	0	0	0	0	0	N	0	0	0	0	0	0	0	0	f	29	medium	0	0	0	0
3737TR2814	0	0	0	0	0	0	0	0	0	0	0	0	1	0	0	0	0	0	0	1	0	0	1	1	0	0	0	0	0	0	1	0	N	0	0	0	0	1	0	0	0	f	53	medium	1	0	0	0
3742TR2813	1	0	0	0	0	0	0	0	0	0	0	0	0	0	0	0	0	0	0	0	0	0	0	0	0	0	0	0	0	0	0	0	N	0	0	0	0	0	0	0	0	f	7	low	0	0	0	0
3772TR2862	1	0	0	0	0	0	0	0	0	0	0	0	0	0	0	0	0	0	0	0	0	0	0	0	0	0	0	0	0	0	0	0	N	0	0	0	0	0	0	0	0	m	6	medium	0	0	0	0
3785TR2880	0	0	0	0	0	0	0	0	0	0	0	0	0	1	0	0	0	0	0	0	0	0	0	0	0	0	0	0	0	0	1	0	N	0	0	0	0	0	0	0	0	m	3	high	1	0	0	0
3796TR2909	1	0	0	0	0	0	0	0	0	0	0	0	0	0	0	0	0	0	0	0	0	0	0	0	0	0	0	0	0	0	0	0	N	0	0	0	0	0	0	0	0	m	49	high	0	0	0	0
3811TR2905	1	0	0	0	0	0	0	0	0	0	0	0	0	0	0	0	0	0	0	0	0	0	0	0	0	0	0	0	0	0	0	0	N	0	0	0	0	1	0	0	0	m	68	high	0	0	0	0
3812TR4331	1	0	0	0	0	0	0	0	0	0	0	0	0	0	0	0	0	0	0	0	0	0	0	0	0	0	0	0	0	0	0	0	N	0	0	0	0	0	0	0	0	f	61	high	0	0	0	0
3815TR2908	0	0	0	0	0	1	0	0	0	0	0	0	0	0	0	0	0	0	0	1	0	0	0	0	0	0	0	0	0	0	0	0	A	0	0	0	0	0	0	0	1	m	8	high	0	0	0	0
3819TR2915	1	0	0	0	0	0	0	0	0	0	0	0	0	0	0	0	0	0	0	0	0	0	0	0	0	0	0	0	0	0	0	0	N	0	0	0	0	0	0	0	1	m	63	high	0	1	0	0
3820TR2914	1	0	0	0	0	0	0	0	0	0	0	0	0	0	0	0	0	0	0	0	0	0	0	0	0	0	0	0	0	0	0	0	A	0	0	0	0	0	0	0	0	m	59	low	2	0	0	0
3830TR2924	0	0	0	0	0	0	1	0	0	0	0	0	0	0	0	0	0	0	0	0	0	0	0	0	0	0	0	0	0	0	0	0	N	0	0	0	0	0	0	0	0	f	34	medium	1	0	0	0
3834TR2933	0	0	0	0	1	0	0	0	0	0	0	0	0	0	0	0	0	0	0	0	0	0	0	0	0	1	0	0	0	0	1	0	N	0	0	0	0	0	0	0	0	m	64	high	0	0	0	0
3841TR2940	1	0	0	0	0	0	0	0	0	0	0	0	0	0	0	0	0	0	0	0	0	0	0	0	0	0	0	0	0	0	0	0	A	0	0	0	1	0	0	0	0	m	35	high	0	0	0	1	1
3846TR2952	1	0	0	0	0	0	0	0	0	0	0	0	0	0	0	0	0	0	0	0	0	0	0	0	0	0	0	0	0	0	0	0	N	0	0	0	0	0	0	0	0	f	55	high	2	0	0	0
3850TR2948	0	0	0	0	0	0	1	0	0	0	1	0	1	0	0	0	0	0	1	0	0	1	0	0	0	0	0	0	0	0	0	0	A	0	0	0	0	0	0	0	1	m	32	high	0	0	0	0
3851TR7502	1	0	0	0	0	0	0	0	0	0	0	0	0	0	0	0	0	0	0	0	0	0	0	0	0	0	0	0	0	0	0	0	N	0	0	0	0	1	0	0	0	f	2	high	0	0	0	0
3859TR3576	0	0	0	0	0	0	1	0	0	0	0	0	0	0	0	0	0	0	0	0	0	0	0	0	0	0	0	0	0	0	0	0	N	0	0	0	0	0	0	0	0	f	56	high	0	0	0	0
3867TR2964	1	0	0	0	0	0	0	0	0	0	0	0	0	0	0	0	0	0	0	0	0	0	0	0	0	0	0	0	0	0	0	0	N	0	0	0	0	0	0	0	0	m	61	medium	1	0	0	0
3872TR2968	0	0	0	0	0	0	0	0	0	0	0	0	0	0	0	0	0	0	0	0	0	0	1	0	0	0	0	0	0	0	0	0	N	0	0	0	0	0	0	0	0	m	67	high	1	0	0	0
3882TR2980	0	0	0	0	0	0	1	0	0	0	0	0	0	0	0	0	0	0	0	0	0	0	0	0	0	0	0	0	1	1	0	0	A	0	0	0	1	0	0	0	0	m	61	high	1	0	0	0
3883TR2977	1	0	0	0	0	0	0	0	0	0	0	0	0	0	0	0	0	0	0	0	0	0	0	0	0	0	0	0	0	0	0	0	N	0	0	0	1	0	0	0	0	m	58	high	0	0	0	0
3890TR2981	0	0	0	0	0	0	0	0	0	0	0	0	1	0	0	0	0	0	0	0	0	0	0	0	0	1	0	0	0	0	0	0	N	0	0	0	0	0	0	0	0	m	43	high	0	0	0	0
3891TR2986	0	0	0	1	0	1	0	0	0	0	1	0	1	0	1	0	0	0	0	0	0	1	1	0	1	1	1	0	0	1	1	0	N	0	0	0	0	0	0	0	0	f	35	medium	6	0	0	0	1
3900TR2990	0	0	0	0	0	0	0	0	0	0	0	0	0	0	1	0	0	0	0	0	0	0	0	0	0	0	0	0	0	0	0	0	A	0	0	0	0	0	1	1	0	m	68	high	1	0	0	0
3901TR2991	0	0	0	0	0	0	0	0	0	0	0	0	0	0	0	0	0	0	0	1	1	0	0	0	0	0	0	0	0	0	1	0	N	0	0	0	0	1	0	0	0	f	51	high	0	0	0	0
3903TR3003	0	0	0	0	0	0	0	0	0	1	0	1	0	0	0	1	0	0	1	0	1	0	1	0	0	0	0	0	1	0	1	0	N	0	0	0	1	0	0	0	0	f	55	high	1	0	0	0
3915TR3015	0	0	0	0	0	1	0	0	0	0	0	0	1	1	0	0	0	0	0	0	0	0	0	1	0	1	0	0	1	0	1	0	N	0	0	1	0	0	0	0	0	m	12	high	2	0	0	0
3923TR3023	0	0	0	1	0	1	0	0	0	0	0	0	1	1	0	0	0	0	1	0	1	0	0	0	1	1	0	1	0	0	1	0	N	0	0	0	0	0	0	0	0	f	33	high	1	0	0	0
3950TR3048	0	0	0	0	0	0	1	0	0	0	0	0	0	0	0	0	1	0	0	1	0	0	1	1	0	0	0	0	0	0	1	0	N	0	0	0	0	0	0	0	0	f	57	high	2	0	0	0
3952TR6853	1	0	0	0	0	0	0	0	0	0	0	0	0	0	0	0	0	0	0	0	0	0	0	0	0	0	0	0	0	0	0	0	A	1	0	0	1	0	0	0	1	f	66	high	0	0	0	0
3959TR3056	1	0	0	0	0	0	0	0	0	0	0	0	0	0	0	0	0	0	0	0	0	0	0	0	0	0	0	0	0	0	0	0	N	0	0	0	0	1	0	0	0	m	46	high	0	0	0	0
3963TR3062	0	0	0	0	0	0	0	0	0	0	0	0	1	1	1	0	0	0	0	0	1	1	1	0	0	1	1	0	0	1	0	0	A	1	0	0	0	0	0	0	0	m	65	low	2	0	0	0
3967TR3069	0	0	0	0	0	0	0	0	0	0	0	0	0	0	0	1	0	0	0	0	0	0	0	0	0	0	0	0	0	0	0	0	N	0	0	0	1	0	0	0	0	m	2	high	0	0	0	1
3970TR3072	0	0	0	0	0	0	0	0	0	0	0	0	0	0	0	0	0	0	0	1	0	0	0	0	0	0	0	0	0	0	0	0	A	0	0	0	0	1	0	0	0	f	63	medium	0	0	0	0
3974TR3076	1	0	0	0	0	0	0	0	0	0	0	0	0	0	0	0	0	0	0	0	0	0	0	0	0	0	0	0	0	0	0	0	N	0	0	0	0	0	0	1	0	f	66	high	1	0	0	0
3984TR8492a	0	0	0	1	0	0	1	0	0	0	0	0	1	0	0	0	1	0	0	1	1	0	1	0	0	1	0	0	0	1	1	0	A	0	0	0	0	0	0	0	1	f	54	high	2	0	0	1
3999TR7345	1	0	0	0	0	0	0	0	0	0	0	0	0	0	0	0	0	0	0	0	0	0	0	0	0	0	0	0	0	0	0	0	N	0	0	0	0	0	0	0	0	f	57	medium	1	0	0	0
4009TR3122	0	0	0	0	0	0	0	0	0	0	0	1	0	0	0	0	0	0	0	0	0	0	0	0	0	0	0	0	0	0	0	0	N	0	0	0	0	0	0	0	1	m	67	high	1	0	0	0
4012TR3117	1	0	0	0	0	0	0	0	0	0	0	0	0	0	0	0	0	0	0	0	0	0	0	0	0	0	0	0	0	0	0	0	N	0	0	0	0	0	0	0	1	m	69	high	1	0	0	0
4013TR3116	0	0	0	0	0	0	0	0	0	0	0	0	0	0	0	0	0	0	0	0	0	0	0	0	0	0	0	0	0	0	0	0	A	0	0	0	0	0	0	0	0	m	64	low	2	0	0	0
4014TR3118	0	0	0	0	0	1	0	0	0	0	1	0	1	0	0	0	0	0	0	0	0	0	0	0	1	0	0	0	0	0	1	0	N	0	0	0	0	0	0	0	0	f	39	medium	2	0	0	0
4026TR3160	0	0	0	0	0	0	0	0	0	0	0	0	0	0	0	0	0	0	0	0	0	0	0	1	0	0	0	0	0	0	0	0	N	0	0	0	0	0	0	0	0	m	65	high	1	0	0	0
4029TR3149	0	0	0	0	0	0	0	0	0	0	0	0	0	1	0	0	0	0	0	1	1	0	1	0	1	0	0	0	0	0	0	0	A	0	0	0	0	0	0	0	0	f	50	high	2	0	0	0
4042TR3168	1	0	0	0	0	0	0	0	0	0	0	0	0	0	0	0	0	0	0	0	0	0	0	0	0	0	0	0	0	0	0	0	N	0	0	0	0	0	0	0	0	f	72	high	2	0	0	0
4057TR3187	1	0	0	0	0	0	0	0	0	0	0	0	0	0	0	0	0	0	0	0	0	0	0	0	0	0	0	0	0	0	0	0	N	0	0	0	0	0	0	0	0	f	9	high	0	0	0	0
4059TR3194	0	0	0	0	0	0	0	0	0	0	0	0	0	0	0	0	0	0	0	0	0	0	0	0	0	0	0	0	0	0	1	0	N	0	0	0	0	0	1	0	1	f	61	high	3	0	0	0
4075TR3228	1	0	0	0	0	0	0	0	0	0	0	0	0	0	0	0	0	0	0	0	0	0	0	0	0	0	0	0	0	0	0	0	A	0	0	0	1	1	0	1	0	m	77	high	0	0	0	0
4076TR4355a	0	1	0	1	1	1	1	1	0	0	1	0	1	0	0	1	1	1	1	1	1	1	1	0	0	0	0	0	1	1	1	0	A	0	0	0	0	0	0	0	1	f	49	high	4	0	0	1	1
4081TR3220	1	0	0	0	0	0	0	0	0	0	0	0	0	0	0	0	0	0	0	0	0	0	0	0	0	0	0	0	0	0	0	0	A	0	0	0	0	0	0	0	1	m	35	high	1	0	0	0
4102TR3256	0	0	0	0	0	0	0	0	0	0	1	0	0	0	0	0	0	0	0	0	0	0	0	0	0	0	0	0	0	0	0	0	N	0	0	0	0	0	0	0	0	m	51	high	1	0	0	1	1
4107TR3255	0	0	0	0	0	0	0	0	0	1	0	0	0	0	0	0	0	0	0	0	0	0	1	0	0	0	0	0	0	0	0	0	N	0	0	0	0	0	1	0	0	m	65	high	2	0	0	0
4110TR3261	0	0	0	0	0	0	0	0	0	0	0	0	0	0	0	0	0	0	0	0	0	0	0	0	0	0	0	0	0	1	1	0	N	0	0	0	1	1	0	0	0	f	58	high	1	0	0	0
4115TR3265	0	0	0	0	0	0	0	0	0	0	1	0	0	0	0	1	0	0	1	0	0	0	0	1	0	0	0	0	0	1	1	0	N	0	0	0	1	1	0	0	0	m	30	high	1	0	0	0
4135TR3282	0	0	0	0	1	0	1	0	0	0	1	0	1	0	0	1	0	0	1	0	0	0	0	0	0	0	0	0	0	0	0	0	N	0	0	0	1	0	0	0	0	f	2	high	0	0	0	0
4147TR3297	0	0	0	0	0	0	0	0	0	0	0	0	0	0	0	0	0	0	0	0	0	0	0	0	0	0	0	0	0	0	0	0	N	0	0	0	1	0	0	0	0	f	64	medium	0	0	0	0
4152TR3300	0	0	0	0	0	0	0	0	0	0	0	0	0	0	0	0	0	0	0	1	0	0	0	0	0	0	0	0	0	0	0	0	N	0	0	0	1	0	0	0	0	f	49	medium	0	0	0	0
4163TR3314	0	0	0	0	0	0	0	0	0	0	0	0	1	0	0	0	0	0	0	0	0	0	0	0	0	0	0	0	0	0	0	0	A	0	0	0	1	0	0	0	0	f	56	medium	1	0	0	0
4164TR3356	0	0	0	0	0	0	0	0	0	0	0	0	0	0	0	0	0	0	0	1	0	0	0	0	0	0	0	0	1	0	0	0	N	0	0	0	1	1	0	0	0	f	66	high	4	0	0	0
4174TR3350	0	0	0	0	0	0	0	0	0	0	0	0	0	0	0	0	1	0	0	0	0	0	0	0	0	0	0	0	0	1	0	0	N	0	0	0	1	1	0	0	0	f	65	high	2	0	0	0
4176TR3328	1	0	0	0	0	0	0	0	0	0	0	0	0	0	0	0	0	0	0	0	0	0	0	0	0	0	0	0	0	0	0	0	N	0	0	0	1	0	0	0	0	m	56	high	1	0	0	0
4180TR3335	0	0	0	0	0	0	0	0	0	0	0	0	0	0	0	0	0	0	0	0	0	1	1	1	0	0	0	0	0	0	1	0	N	0	0	0	1	0	0	0	0	f	60	medium	2	0	0	0
4185TR3460	1	0	0	0	0	0	0	0	0	0	0	0	0	0	0	0	0	0	0	0	0	0	0	0	0	0	0	0	0	0	0	0	N	1	0	0	1	1	0	0	1	m	68	high	1	0	0	0
4186TR3820	0	1	0	0	0	1	0	0	0	0	0	0	1	0	0	0	0	0	0	1	0	1	0	0	1	0	0	0	1	0	1	1	N	0	0	0	0	1	0	0	0	f	42	medium	1	0	0	0
4190TR3349	0	0	0	0	0	0	0	0	0	0	0	1	0	0	0	0	0	0	0	0	0	0	0	0	0	0	0	0	0	0	0	0	A	0	0	0	1	1	0	1	0	m	65	medium	1	0	0	0
4198TR3363	0	0	0	0	0	0	0	0	0	0	0	0	0	0	1	0	0	0	0	0	0	0	0	0	0	0	0	0	0	0	0	0	N	0	0	0	1	0	1	0	1	f	46	medium	1	0	0	0
4204TR3379	0	0	0	0	0	0	1	0	0	0	0	0	0	0	0	0	0	0	1	0	0	0	1	0	0	0	0	0	0	0	0	0	N	0	0	0	1	0	0	0	1	f	66	medium	3	0	0	0
4205TR3383	0	0	0	0	0	0	0	0	0	0	0	0	0	0	0	0	0	0	0	0	0	0	0	0	0	0	0	0	0	0	0	0	N	0	0	0	1	1	0	0	0	f	59	high	0	0	0	0
4218TR3394	0	0	0	0	0	0	0	0	0	0	0	0	1	0	0	0	0	0	0	1	0	0	1	0	0	0	0	1	0	0	0	0	N	0	0	0	1	0	0	0	0	f	51	medium	0	0	0	0
4226TR3404	0	0	0	0	0	0	1	0	0	0	0	0	0	0	0	0	0	0	1	0	0	0	0	1	0	1	1	0	0	0	0	1	N	0	0	0	1	0	0	0	0	f	39	high	0	0	0	0
4230TR3407	1	0	0	0	0	0	0	0	0	0	0	0	0	0	0	0	0	0	0	0	0	0	0	0	0	0	0	0	0	0	0	0	N	0	0	0	1	0	0	0	0	f	32	high	0	0	0	0
4241TR3430	0	0	0	0	0	0	0	0	0	1	0	0	0	0	0	0	0	0	0	0	0	0	0	0	0	0	0	0	0	0	0	0	N	0	0	0	1	0	0	0	0	m	45	medium	0	0	0	0
4257TR3453	1	0	0	0	0	0	0	0	0	0	0	0	0	0	0	0	0	0	0	0	0	0	0	0	0	0	0	0	0	0	0	0	N	0	0	0	1	0	0	0	0	m	66	medium	1	0	0	0
4261TR3459	0	0	0	0	0	0	0	0	0	0	0	0	0	0	0	0	0	0	0	0	0	0	0	1	0	0	0	0	0	0	0	0	N	0	0	0	1	0	0	0	0	f	33	high	0	0	0	0
4269TR3468	0	0	0	1	0	0	0	0	0	0	0	0	0	0	0	0	0	0	0	1	0	0	0	0	0	0	0	0	0	0	1	0	N	0	0	0	0	0	0	0	0	f	45	medium	0	0	0	0
4282TR3482	0	0	0	0	0	0	0	0	0	0	0	0	0	0	1	0	0	0	0	0	0	0	0	0	0	0	0	0	0	0	0	0	A	0	0	0	0	0	0	0	0	m	57	high	2	0	0	0
4285TR3488	1	0	0	0	0	0	0	0	0	0	0	0	0	0	0	0	0	0	0	0	0	0	0	0	0	0	0	0	0	0	0	0	A	0	0	0	0	0	0	0	0	f	63	high	1	0	0	0
4287TR3497	0	0	0	1	0	0	0	1	0	0	0	0	0	0	1	0	0	0	0	0	0	0	0	0	0	1	0	0	0	0	1	0	A	0	0	0	0	0	0	0	0	m	37	high	1	0	0	0
4311TR3522	1	0	0	0	0	0	0	0	0	0	0	0	0	0	0	0	0	0	0	0	0	0	0	0	0	0	0	0	0	0	0	0	N	0	0	0	0	0	0	0	1	f	44	high	0	0	0	0
4318TR3529	1	0	0	0	0	0	0	0	0	0	0	0	0	0	0	0	0	0	0	0	0	0	0	0	0	0	0	0	0	0	0	0	N	0	0	0	1	0	0	0	0	m	1	low	0	0	0	0
4322TR3538	1	0	0	0	0	0	0	0	0	0	0	0	0	0	0	0	0	0	0	0	0	0	0	0	0	0	0	0	0	0	0	0	N	0	0	0	1	1	1	0	0	f	64	medium	0	0	0	0
4333TR3555	1	0	0	0	0	0	0	0	0	0	0	0	0	0	0	0	0	0	0	0	0	0	0	0	0	0	0	0	0	0	0	0	N	0	0	0	0	1	0	0	0	f	11	medium	0	0	0	0
4334TR3554	0	0	0	0	0	0	0	0	0	0	0	0	0	0	0	0	0	0	0	0	0	0	0	0	0	0	0	0	0	1	0	0	A	0	0	0	0	0	0	0	1	f	56	medium	3	0	0	0
4339TR3563	0	0	0	0	0	0	0	0	0	0	1	0	0	0	0	1	0	0	0	0	0	0	0	0	0	0	0	0	0	0	1	0	N	0	0	0	1	0	0	0	0	f	34	high	1	0	0	0
4349TR3579	1	0	0	0	0	0	0	0	0	0	0	0	0	0	0	0	0	0	0	0	0	0	0	0	0	0	0	0	0	0	0	0	A	0	0	0	0	0	1	0	0	m	71	high	3	0	0	0
4356TR3582	1	0	0	0	0	0	0	0	0	0	0	0	0	0	0	0	0	0	0	0	0	0	0	0	0	0	0	0	0	0	0	0	A	0	0	0	0	1	0	0	0	m	33	medium	2	0	0	0
4361TR3584	0	0	0	0	1	0	0	0	0	0	0	0	0	1	0	0	0	0	0	0	0	0	0	0	0	0	0	0	0	0	0	0	N	0	0	0	0	0	0	0	0	f	6	high	0	0	0	0
4369TR3594	1	0	0	0	0	0	0	0	0	0	0	0	0	0	0	0	0	0	0	0	0	0	0	0	0	0	0	0	0	0	0	0	N	0	0	0	1	0	0	0	0	m	8	high	0	0	0	0
4370TR3608	0	0	0	1	0	0	0	1	0	0	1	0	1	0	1	0	0	0	1	1	0	0	0	0	0	0	0	0	0	0	1	0	N	0	0	0	1	0	0	0	0	f	64	high	0	0	0	0
4371TR3601	0	0	0	0	0	0	1	1	0	0	0	1	0	1	0	0	0	0	0	0	0	0	0	0	0	0	0	0	0	0	0	0	A	0	0	0	1	1	0	0	0	f	67	medium	2	0	0	0
4374TR3628	0	0	0	1	0	1	0	0	0	0	1	0	1	0	1	0	0	0	0	0	1	1	1	1	1	0	0	0	1	1	1	0	N	0	0	0	0	0	0	0	1	f	47	high	3	0	0	0
4375TR3602	0	0	0	0	0	0	0	0	0	0	0	1	0	0	0	0	0	0	0	0	0	0	0	0	0	0	0	0	0	0	0	0	N	0	0	0	0	0	0	0	0	m	72	medium	0	0	0	0
4380TR3612	0	0	0	0	0	0	0	1	0	0	0	0	0	0	0	0	0	0	0	1	0	0	0	0	0	1	0	0	0	0	0	0	N	0	0	0	0	0	0	0	1	m	52	high	0	0	0	0
4384TR3616	1	0	0	0	0	0	0	0	0	0	0	0	0	0	0	0	0	0	0	0	0	0	0	0	0	0	0	0	0	0	0	0	N	0	0	0	0	0	0	0	0	f	51	medium	0	0	0	0
4385TR3617	0	0	0	1	0	1	1	1	0	1	1	0	0	1	1	0	0	0	0	0	0	0	1	1	1	1	0	1	0	1	1	0	N	0	0	0	0	0	0	0	0	m	62	medium	4	0	0	0
4387TR3618	1	0	0	0	0	0	0	0	0	0	0	0	0	0	0	0	0	0	0	0	0	0	0	0	0	0	0	0	0	0	0	0	N	0	0	0	1	0	0	0	1	m	4	high	0	0	0	0
4390TR3621	1	0	0	0	0	0	0	0	0	0	0	0	0	0	0	0	0	0	0	0	0	0	0	0	0	0	0	0	0	0	0	0	A	0	0	0	0	0	0	0	0	f	62	medium	0	0	0	1	1
4399TR3634	1	0	0	0	0	0	0	0	0	0	0	0	0	0	0	0	0	0	0	0	0	0	0	0	0	0	0	0	0	0	0	0	N	0	0	0	1	1	0	0	0	f	8	medium	1	0	0	0
4402TR3635	0	0	0	1	0	0	0	0	0	0	0	0	1	0	0	0	0	0	0	0	0	0	0	0	0	0	0	0	0	0	0	0	N	0	0	0	0	0	0	0	0	m	37	high	0	0	0	0
4403TR3659	1	0	0	0	0	0	0	0	0	0	0	0	0	0	0	0	0	0	0	0	0	0	0	0	0	0	0	0	0	0	0	0	N	0	0	0	1	1	0	0	0	m	65	high	0	0	0	0
4410TR3655	0	0	0	0	0	0	0	0	0	0	0	0	0	0	0	0	0	0	0	0	0	0	0	0	0	0	0	0	0	0	0	0	A	0	0	0	1	1	0	0	1	m	70	high	2	1	0	1	1
4413TR3647	1	0	0	0	0	0	0	0	0	0	0	0	0	0	0	0	0	0	0	0	0	0	0	0	0	0	0	0	0	0	0	0	N	0	0	0	0	0	0	0	1	m	30	high	0	0	0	0
4418TR3651	1	0	0	0	0	0	0	0	0	0	0	0	0	0	0	0	0	0	0	0	0	0	0	0	0	0	0	0	0	0	0	0	N	0	0	0	0	0	0	0	0	m	65	medium	0	0	0	0
4420TR3652	1	0	0	0	0	0	0	0	0	0	0	0	0	0	0	0	0	0	0	0	0	0	0	0	0	0	0	0	0	0	0	0	A	0	0	0	1	0	0	0	1	m	4	high	0	0	0	0
4421TR3653	0	1	0	0	1	0	1	0	0	1	0	0	0	0	0	0	0	0	0	0	0	0	1	1	0	1	0	0	0	1	0	1	N	0	0	0	1	0	0	0	0	f	63	medium	3	0	0	0
4425TR3656	1	0	0	0	0	0	0	0	0	0	0	0	0	0	0	0	0	0	0	0	0	0	0	0	0	0	0	0	0	0	0	0	N	0	0	0	0	1	1	0	1	f	64	high	3	0	0	0
4429TR3667	0	0	0	0	0	0	0	0	0	0	0	0	0	0	0	0	0	0	0	0	0	0	0	0	0	0	0	0	0	0	1	0	A	0	0	0	0	0	0	0	1	f	56	low	0	0	0	0
4430TR3664	1	0	0	0	0	0	0	0	0	0	0	0	0	0	0	0	0	0	0	0	0	0	0	0	0	0	0	0	0	0	0	0	N	0	0	0	0	1	0	0	0	f	72	medium	1	0	0	0
4437TR3677	0	0	0	0	1	0	0	0	0	0	0	0	1	0	0	0	0	0	0	0	0	1	0	0	0	0	0	0	0	0	0	0	N	0	0	0	0	1	0	0	0	m	12	high	0	0	0	0
4439TR3678	0	0	0	0	0	0	0	0	0	0	0	0	1	0	0	0	0	0	0	0	0	0	0	0	0	0	0	0	0	0	0	0	N	0	0	0	1	1	0	0	0	f	38	high	0	0	0	0
4447TR3687	0	0	0	0	1	0	0	0	0	0	0	0	1	0	0	0	0	0	0	0	0	0	0	0	0	0	0	0	0	0	0	0	N	0	0	0	1	1	0	0	0	m	28	high	0	0	0	0
4449TR3688	1	0	0	0	0	0	0	0	0	0	0	0	0	0	0	0	0	0	0	0	0	0	0	0	0	0	0	0	0	0	0	0	N	0	0	0	0	1	0	0	0	m	76	high	0	0	0	0
4451TR3691	1	0	0	0	0	0	0	0	0	0	0	0	0	0	0	0	0	0	0	0	0	0	0	0	0	0	0	0	0	0	0	0	N	0	0	0	0	0	0	0	0	m	26	high	0	0	0	0
4452TR3695	0	0	0	0	0	0	0	0	0	0	0	0	0	1	0	0	0	0	0	0	0	0	0	0	0	0	0	0	0	0	0	0	N	0	0	0	1	0	0	0	0	f	56	medium	0	0	0	0
4453TR3696	0	0	0	0	0	0	0	0	0	0	0	0	0	0	0	0	0	0	0	0	0	0	0	0	0	0	0	0	0	0	1	0	N	0	0	0	0	0	0	0	0	m	43	high	1	0	0	0
4455TR3697	1	0	0	0	0	0	0	0	0	0	0	0	0	0	0	0	0	0	0	0	0	0	0	0	0	0	0	0	0	0	0	0	N	0	0	0	0	0	0	0	0	m	56	low	1	0	0	0
4457TR3699	0	0	0	1	0	0	0	1	0	0	1	0	1	0	0	1	0	0	0	1	0	0	1	0	0	1	0	0	0	0	1	0	N	0	0	0	1	1	0	0	0	m	47	medium	0	1	1	0
4460TR3703	1	0	0	0	0	0	0	0	0	0	0	0	0	0	0	0	0	0	0	0	0	0	0	0	0	0	0	0	0	0	0	0	A	0	0	0	0	1	0	0	0	f	59	medium	0	0	0	0
4464TR3707	1	0	0	0	0	0	0	0	0	0	0	0	0	0	0	0	0	0	0	0	0	0	0	0	0	0	0	0	0	0	0	0	N	0	0	0	1	1	0	0	0	f	62	medium	0	0	0	0
4473TR3727	0	0	0	0	0	0	0	0	0	0	0	0	0	0	0	0	0	0	0	0	0	0	0	0	0	0	0	0	0	0	1	0	A	0	0	0	0	0	0	0	1	m	53	medium	0	0	0	0
4474TR3715	0	1	0	0	0	0	0	0	0	0	0	0	1	0	0	0	0	0	0	1	0	0	0	0	0	0	0	0	0	0	1	0	N	0	0	0	0	0	0	0	0	f	58	high	2	0	0	0
4480TR3721	1	0	0	0	0	0	0	0	0	0	0	0	0	0	0	0	0	0	0	0	0	0	0	0	0	0	0	0	0	0	0	0	N	0	0	0	0	0	0	0	0	m	66	high	0	0	0	0
4481TR3723	0	0	0	0	0	0	0	0	0	0	0	0	0	0	0	0	0	0	0	0	0	0	0	1	0	0	0	0	0	0	0	0	N	0	0	0	0	0	0	0	0	m	54	high	0	0	0	0
4482TR3724	0	0	0	0	0	0	0	0	0	0	1	0	0	0	0	0	0	0	0	0	0	0	0	0	0	0	0	0	0	0	0	0	N	0	0	0	0	1	0	0	0	m	65	high	0	0	0	0
4488TR3728	0	0	0	0	0	0	0	0	0	0	0	0	0	0	0	0	0	0	0	0	0	0	0	0	0	0	0	0	0	0	0	0	N	0	0	0	0	1	0	0	0	f	60	low	0	0	0	0
4500TR3739	0	0	0	0	0	0	0	0	0	0	0	0	0	0	0	0	0	0	0	0	0	0	0	1	0	0	0	0	0	1	0	1	A	0	1	0	0	1	0	0	0	m	52	medium	0	0	0	0
4502TR3737	1	0	0	0	0	0	0	0	0	0	0	0	0	0	0	0	0	0	0	0	0	0	0	0	0	0	0	0	0	0	0	0	N	0	0	0	0	0	0	0	0	f	55	high	1	0	0	0
4512TR3751	0	0	0	0	0	0	0	0	0	0	0	0	0	0	0	0	0	0	0	0	0	0	0	0	0	0	0	0	0	0	1	0	N	0	0	0	0	1	1	0	0	f	35	high	0	0	0	0
4522TR3771	0	0	0	0	0	0	0	1	0	1	0	0	1	0	1	1	1	0	1	1	0	0	1	0	0	0	0	0	0	0	1	1	A	0	0	0	0	1	0	0	1	f	46	medium	0	1	1	0
4548TR3788	0	0	0	0	0	0	0	0	0	0	0	0	1	0	0	0	0	0	0	0	0	0	0	0	0	0	0	0	0	0	0	0	N	0	0	0	0	0	1	0	1	m	68	high	0	0	0	0
4549TR3789	0	0	0	0	0	0	1	0	0	0	0	0	0	0	0	0	0	0	0	0	0	0	1	0	0	0	0	0	0	0	0	0	A	0	0	0	1	0	0	0	0	m	78	high	3	0	0	0
4722TR3808	0	0	0	0	0	0	0	0	0	0	0	0	1	0	0	0	0	0	0	0	0	1	0	1	0	0	0	0	0	0	0	0	N	0	1	0	1	0	0	1	0	f	62	medium	3	0	0	0
4731TR3813	1	0	0	0	0	0	0	0	0	0	0	0	0	0	0	0	0	0	0	0	0	0	0	0	0	0	0	0	0	0	0	0	N	0	0	0	0	0	0	0	0	f	66	high	0	0	0	0
4740TR3869	0	0	0	0	0	0	1	0	0	1	1	0	0	0	0	1	1	0	0	0	1	0	1	1	0	1	1	0	0	1	0	1	A	0	0	0	0	0	0	0	0	f	64	high	2	0	0	0
4741TR3824	0	0	0	0	0	0	0	0	0	0	0	0	1	0	0	1	0	0	0	0	0	0	0	0	0	0	0	0	0	0	0	0	N	0	0	0	1	0	0	0	1	f	27	high	1	0	0	0
4744TR3825	1	0	0	0	0	0	0	0	0	0	0	0	0	0	0	0	0	0	0	0	0	0	0	0	0	0	0	0	0	0	0	0	N	0	0	0	0	1	0	0	0	m	65	medium	2	0	0	0
4747TR3829	1	0	0	0	0	0	0	0	0	0	0	0	0	0	0	0	0	0	0	0	0	0	0	0	0	0	0	0	0	0	0	0	N	0	0	0	0	0	0	0	0	m	67	medium	0	0	0	0
4750TR3831	0	0	0	0	0	0	1	1	0	0	1	0	1	1	1	0	0	0	1	0	0	0	0	0	0	0	0	0	0	0	0	0	N	0	0	0	1	0	0	0	1	f	55	high	2	0	0	0
4753TR3836	1	0	0	0	0	0	0	0	0	0	0	0	0	0	0	0	0	0	0	0	0	0	0	0	0	0	0	0	0	0	0	0	N	0	0	0	0	0	0	0	0	m	71	high	1	0	0	0
4758TR3843	0	0	0	0	0	0	1	0	0	0	1	0	1	0	0	0	0	0	0	0	0	1	0	0	0	0	0	0	0	0	0	0	N	0	0	0	0	1	0	0	0	f	18	low	0	0	0	0
4771TR3865	0	0	0	0	0	0	0	0	0	0	0	0	0	0	0	0	0	0	0	0	0	0	0	0	0	0	0	0	0	0	1	0	N	0	0	0	0	0	0	0	0	f	67	high	1	1	2	0
4773TR3862	0	0	0	0	0	0	0	0	0	0	0	0	1	0	0	0	0	0	0	0	0	0	0	0	0	0	0	0	0	0	0	0	N	0	0	0	0	1	0	0	0	f	28	high	0	0	0	0
4777TR3866	0	0	0	0	0	0	0	0	0	1	0	0	0	0	0	0	0	0	0	0	0	0	0	0	0	0	0	0	0	0	0	0	N	0	0	0	0	0	0	0	0	f	60	medium	2	0	0	0
4779TR3867	0	0	0	0	0	0	0	1	0	0	1	0	0	0	0	0	0	0	1	0	0	1	0	0	0	0	0	0	0	0	1	0	N	0	0	0	0	0	0	0	1	f	62	high	3	0	0	0
4793TR7504	0	0	0	0	0	0	0	0	0	0	0	0	0	0	0	0	0	0	0	0	0	0	0	0	0	0	0	0	0	0	1	0	N	0	0	0	0	1	0	0	0	m	34	high	0	0	0	0
4802TR3895	1	0	0	0	0	0	0	0	0	0	0	0	0	0	0	0	0	0	0	0	0	0	0	0	0	0	0	0	0	0	0	0	N	0	0	0	0	0	1	0	1	m	7	high	0	0	0	0
4805TR3897	0	0	0	0	1	0	0	0	0	0	0	0	0	0	0	0	0	0	0	0	0	1	0	0	0	0	0	0	0	0	0	0	N	0	0	0	0	0	0	0	1	m	7	high	0	0	0	0
4807TR3901	1	0	0	0	0	0	0	0	0	0	0	0	0	0	0	0	0	0	0	0	0	0	0	0	0	0	0	0	0	0	0	0	N	0	0	0	0	0	0	0	0	f	3	high	1	0	0	0
4824TR3918	1	0	0	0	0	0	0	0	0	0	0	0	0	0	0	0	0	0	0	0	0	0	0	0	0	0	0	0	0	0	0	0	N	0	0	0	1	0	0	0	0	f	6	high	0	0	0	0
4826TR3922	1	0	0	0	0	0	0	0	0	0	0	0	0	0	0	0	0	0	0	0	0	0	0	0	0	0	0	0	0	0	0	0	A	0	0	0	0	0	0	0	0	m	72	high	1	0	0	0
4827TR3923	0	0	0	0	0	0	0	0	0	0	0	0	0	0	0	0	0	0	0	0	0	0	0	0	1	0	0	1	1	0	0	0	N	0	0	0	0	0	1	0	0	f	39	high	1	0	0	0
4828TR3926	0	0	0	0	1	0	0	0	0	0	0	0	0	0	0	0	0	0	0	1	1	0	0	0	0	0	0	0	1	0	0	0	N	0	0	0	0	0	0	0	0	f	55	high	0	0	0	0
4832TR3930	0	0	0	1	0	0	0	0	0	0	1	0	0	0	0	1	0	0	0	1	0	0	0	0	0	1	0	0	0	0	1	0	N	0	0	0	0	0	0	0	1	f	40	high	0	1	0	0
4839TR3937	0	0	0	0	0	0	0	0	0	0	0	0	0	0	0	0	0	0	0	0	0	0	0	1	0	0	0	0	0	0	0	0	N	0	0	0	0	0	1	0	0	m	73	medium	1	0	0	0
4844TR3946	0	0	0	1	0	1	0	1	0	0	0	0	1	0	0	0	0	0	0	0	1	1	0	0	0	0	0	1	0	0	1	0	N	0	0	0	0	0	0	0	0	f	44	high	0	0	0	0
4845TR3947	0	0	0	0	0	0	0	0	0	0	0	0	0	0	1	0	0	0	0	0	0	0	0	0	0	0	0	0	0	0	0	0	A	0	0	0	0	0	0	0	1	f	38	medium	0	0	0	0
4855TR3957	0	0	0	0	0	0	0	0	0	0	1	0	0	0	0	1	0	0	0	0	0	0	0	0	0	0	0	0	0	0	0	0	N	0	0	0	0	0	0	0	0	m	7	medium	0	0	0	1
4857TR3959	1	0	0	0	0	0	0	0	0	0	0	0	0	0	0	0	0	0	0	0	0	0	0	0	0	0	0	0	0	0	0	0	N	0	0	0	1	1	0	0	0	m	69	high	2	0	0	0
4858TR3960	0	0	0	0	0	0	0	0	0	0	0	0	0	0	0	0	1	0	0	0	0	0	0	0	0	0	0	0	0	0	1	0	N	0	0	0	0	1	0	0	0	m	25	medium	0	0	0	0
4861TR3964	0	0	0	1	1	0	1	0	0	0	1	0	1	0	0	1	0	0	1	1	0	0	0	0	0	0	0	0	0	0	1	0	N	0	0	0	0	0	0	0	0	m	32	high	0	0	0	0
4865TR3969	0	0	0	0	0	0	0	0	0	0	0	0	1	0	1	0	0	0	0	0	1	0	0	1	0	0	0	0	0	1	0	0	N	0	0	0	0	0	0	0	0	m	60	high	3	0	0	0
4877TR3974	1	0	0	0	0	0	0	0	0	0	0	0	0	0	0	0	0	0	0	0	0	0	0	0	0	0	0	0	0	0	0	0	N	0	0	0	0	0	0	0	0	f	58	high	2	0	0	0
4878TR3976	0	0	0	0	0	0	0	0	0	0	0	0	0	0	0	0	0	0	0	0	0	0	0	1	0	0	0	0	0	0	0	0	A	0	0	0	0	0	0	0	0	m	81	high	0	0	0	0
4879TR3977	0	0	0	0	0	0	0	0	0	0	0	0	0	0	0	0	0	0	0	0	0	0	1	0	0	0	0	0	0	0	0	0	N	0	0	0	0	1	0	0	0	m	65	high	1	0	0	0
4883TR3980	1	0	0	0	0	0	0	0	0	0	0	0	0	0	0	0	0	0	0	0	0	0	0	0	0	0	0	0	0	0	0	0	N	0	0	0	0	1	0	0	0	m	5	high	0	0	0	0
4885TR3985	0	0	0	0	0	0	0	0	0	0	0	0	0	0	0	0	0	0	0	0	0	0	1	0	0	0	0	0	0	0	1	0	N	0	0	0	0	0	0	0	0	m	56	high	0	0	0	0
4887TR3982	0	0	0	0	0	0	0	0	0	0	1	0	0	0	0	0	0	0	0	1	0	0	0	1	0	1	0	0	0	0	1	0	N	0	0	0	0	1	0	0	0	m	33	high	0	0	0	0
4888TR3984	1	0	0	0	0	0	0	0	0	0	0	0	0	0	0	0	0	0	0	0	0	0	0	0	0	0	0	0	0	0	0	0	N	0	0	0	0	0	0	0	1	f	57	high	1	0	0	0
4896TR3993	0	0	0	0	0	0	0	0	0	0	0	0	0	0	0	0	1	0	0	0	0	0	1	0	0	0	1	0	0	0	1	0	N	0	0	0	0	0	0	0	0	f	74	high	0	0	0	0
4902TR1825a	1	0	0	0	0	0	0	0	0	0	0	0	0	0	0	0	0	0	0	0	0	0	0	0	0	0	0	0	0	0	0	0	N	0	0	0	0	0	0	0	0	f	11	high	0	0	0	1
4912TR4021	1	0	0	0	0	0	0	0	0	0	0	0	0	0	0	0	0	0	0	0	0	0	0	0	0	0	0	0	0	0	0	0	N	0	0	0	1	1	0	0	0	f	63	medium	2	0	0	0
4916TR4023	0	0	0	0	0	0	0	0	0	0	0	0	0	0	0	0	0	0	0	1	0	0	0	0	0	0	0	0	0	0	0	0	N	1	0	0	0	0	0	0	0	f	56	high	2	0	0	0
4921TR4031	0	0	0	0	0	0	0	0	0	0	0	0	1	0	0	0	0	0	0	0	0	1	0	0	0	0	0	0	0	0	0	0	N	0	0	0	0	1	0	0	0	m	58	medium	0	0	0	0
4927TR4038	0	0	0	0	0	0	0	0	0	0	0	0	0	0	0	0	0	0	0	0	0	0	0	0	0	0	0	0	0	0	0	0	N	0	0	0	0	1	0	0	0	f	65	high	0	0	0	0
4929TR4040	1	0	0	0	0	0	0	0	0	0	0	0	0	0	0	0	0	0	0	0	0	0	0	0	0	0	0	0	0	0	0	0	N	0	0	0	1	0	0	0	0	f	13	high	1	0	0	0
4936TR4051	0	0	0	0	0	0	0	0	0	0	0	0	0	0	1	0	0	0	1	0	0	0	0	0	0	0	0	0	0	0	0	0	N	0	0	0	1	0	0	0	0	m	22	medium	0	0	0	0
4937TR4053	0	0	0	0	0	0	0	0	0	0	0	0	0	1	0	0	0	0	0	0	0	0	0	0	0	0	0	0	0	0	0	0	A	0	0	0	0	0	0	0	0	m	43	medium	0	0	0	0
4938TR4052	0	0	0	0	0	0	0	0	0	0	0	0	0	0	0	0	0	0	0	0	0	0	0	0	0	0	0	0	0	1	1	0	N	0	0	0	0	1	0	0	0	m	54	high	0	0	0	0
4942TR4057	0	0	0	0	0	0	0	0	0	0	0	0	0	0	0	0	0	0	1	0	0	0	0	0	0	0	0	0	0	0	0	0	N	0	0	0	0	0	0	0	0	m	1	medium	0	0	0	0
4946TR4060	1	0	0	0	0	0	0	0	0	0	0	0	0	0	0	0	0	0	0	0	0	0	0	0	0	0	0	0	0	0	0	0	N	0	0	0	0	0	0	0	1	f	39	medium	0	1	1	0
4954TR4069	1	0	0	0	0	0	0	0	0	0	0	0	0	0	0	0	0	0	0	0	0	0	0	0	0	0	0	0	0	0	0	0	A	0	0	0	0	1	0	0	1	m	49	high	0	0	0	0
4959TR4070	0	0	0	0	0	0	0	0	0	0	0	0	0	0	1	0	0	0	0	0	0	0	0	0	0	0	0	0	0	0	0	0	N	0	0	0	0	1	0	0	0	m	39	medium	0	0	0	0
4969TR4089	1	0	0	0	0	0	0	0	0	0	0	0	0	0	0	0	0	0	0	0	0	0	0	0	0	0	0	0	0	0	0	0	N	0	0	0	0	0	0	0	0	m	73	high	0	0	0	0
4971TR4091	0	0	0	0	0	1	1	0	0	0	0	0	0	0	0	0	1	0	0	1	0	0	0	1	0	1	1	0	1	1	1	0	A	0	0	0	0	0	0	0	1	f	49	high	1	0	0	0
4972TR4146	0	0	0	0	0	0	0	0	0	0	0	0	0	0	0	0	0	0	0	0	0	0	0	0	1	0	0	0	0	0	1	0	N	0	0	0	0	0	0	0	0	f	44	medium	2	0	0	0
4973TR4094	0	0	0	0	0	0	0	0	0	0	0	0	1	0	0	0	0	0	0	0	0	0	0	1	0	0	0	0	0	0	0	0	A	0	0	0	1	0	0	1	0	f	42	high	0	0	0	0
4977TR4099	0	0	0	0	0	0	0	0	0	0	1	0	0	0	0	1	0	0	0	0	0	0	0	1	0	1	0	0	0	0	0	0	N	0	0	0	0	0	0	0	0	m	36	high	0	0	0	0
4978TR4101	1	0	0	0	0	0	0	0	0	0	0	0	0	0	0	0	0	0	0	0	0	0	0	0	0	0	0	0	0	0	0	0	N	0	0	0	0	0	0	0	0	m	50	high	0	0	0	0
4979TR4102	1	0	0	0	0	0	0	0	0	0	0	0	0	0	0	0	0	0	0	0	0	0	0	0	0	0	0	0	0	0	0	0	N	0	0	0	1	0	0	0	0	m	80	medium	0	0	0	0
4980TR4103	1	0	0	0	0	0	0	0	0	0	0	0	0	0	0	0	0	0	0	0	0	0	0	0	0	0	0	0	0	0	0	0	N	0	0	0	0	0	0	1	1	f	23	high	0	0	0	0
4981TR4104	1	0	0	0	0	0	0	0	0	0	0	0	0	0	0	0	0	0	0	0	0	0	0	0	0	0	0	0	0	0	0	0	N	0	0	0	0	0	0	0	0	f	34	high	0	0	0	0
4983TR4105	0	0	0	0	0	0	0	0	0	0	0	0	0	1	0	0	0	0	0	0	0	0	0	0	0	0	0	0	0	0	0	0	A	0	0	0	0	0	0	0	0	m	14	high	0	0	0	0
4984TR4106	1	0	0	0	0	0	0	0	0	0	0	0	0	0	0	0	0	0	0	0	0	0	0	0	0	0	0	0	0	0	0	0	N	0	0	0	0	0	0	0	0	f	66	high	0	0	0	0
4985TR4111	1	0	0	0	0	0	0	0	0	0	0	0	0	0	0	0	0	0	0	0	0	0	0	0	0	0	0	0	0	0	0	0	A	0	0	0	0	1	0	0	0	f	48	high	0	0	0	0
4986TR4107	0	0	0	0	1	0	1	0	0	0	0	0	0	0	0	0	0	0	0	0	0	0	0	0	0	0	0	0	0	0	0	0	N	0	0	0	1	0	0	0	0	f	39	high	0	0	0	0
4988TR4110	1	0	0	0	0	0	0	0	0	0	0	0	0	0	0	0	0	0	0	0	0	0	0	0	0	0	0	0	0	0	0	0	N	0	0	0	0	0	0	0	0	f	57	medium	1	0	0	0
4990TR4113	0	0	0	0	0	0	0	0	0	0	0	0	0	0	1	0	0	0	0	0	0	0	0	0	0	0	0	0	0	0	0	0	N	0	0	0	1	0	0	0	0	f	55	low	2	0	0	0
4991TR4114	0	0	0	0	0	0	0	0	0	0	0	0	0	0	0	0	0	0	0	0	0	0	0	0	0	0	0	0	0	0	0	0	N	0	0	0	0	0	0	0	0	f	60	high	0	0	0	0
4995TR4118	0	0	0	0	0	0	0	0	0	0	0	0	0	0	0	0	0	0	0	0	1	0	0	0	0	0	0	1	0	0	1	0	N	0	0	0	0	0	0	0	0	m	45	high	1	0	0	0
4998TR4121	0	0	0	0	0	0	0	0	0	0	0	0	0	1	0	0	0	0	0	0	0	0	0	0	0	0	0	0	0	0	0	0	N	0	0	0	1	0	0	0	1	f	2	high	0	0	0	0
5006TR4129	0	0	0	0	0	0	0	1	0	1	0	0	1	0	0	0	0	0	0	0	0	0	0	0	0	0	0	0	0	0	0	0	N	0	0	0	0	0	0	0	0	f	60	high	1	0	0	0
5012TR4133	0	0	0	0	0	0	0	0	0	0	0	0	1	0	0	0	0	0	0	0	0	0	0	0	0	0	0	0	0	0	0	0	N	0	0	0	0	0	0	0	0	f	50	medium	1	0	0	0
5015TR4137	1	0	0	0	0	0	0	0	0	0	0	0	0	0	0	0	0	0	0	0	0	0	0	0	0	0	0	0	0	0	0	0	N	0	0	0	1	0	0	0	0	m	8	low	0	0	0	0
5026TR4148	1	0	0	0	0	0	0	0	0	0	0	0	0	0	0	0	0	0	0	0	0	0	0	0	0	0	0	0	0	0	0	0	N	0	0	0	0	0	0	0	0	m	17	medium	0	0	0	0
5027TR4149	1	0	0	0	0	0	0	0	0	0	0	0	0	0	0	0	0	0	0	0	0	0	0	0	0	0	0	0	0	0	0	0	N	0	0	0	0	0	0	0	0	m	64	high	1	0	0	0
5031TR4151	0	0	0	0	0	0	0	0	0	0	0	0	0	0	0	0	0	0	0	0	0	0	0	0	0	0	0	0	0	1	0	0	N	0	0	0	0	0	0	0	0	f	35	high	0	0	0	0
5035TR4155	1	0	0	0	0	0	0	0	0	0	0	0	0	0	0	0	0	0	0	0	0	0	0	0	0	0	0	0	0	0	0	0	N	0	0	0	0	0	0	0	1	m	56	medium	2	0	0	0
5038TR4158	1	0	0	0	0	0	0	0	0	0	0	0	0	0	0	0	0	0	0	0	0	0	0	0	0	0	0	0	0	0	0	0	N	0	0	0	0	1	0	0	0	m	7	high	0	0	0	0
5045TR4164	0	0	0	0	0	0	0	0	0	0	0	0	0	0	0	0	0	0	0	0	0	0	0	1	0	0	0	0	0	0	0	0	A	0	0	0	0	1	0	0	1	m	66	low	2	0	0	0
5055TR4174	1	0	0	0	0	0	0	0	0	0	0	0	0	0	0	0	0	0	0	0	0	0	0	0	0	0	0	0	0	0	0	0	A	0	0	0	0	0	0	0	0	f	65	high	1	1	1	0
5058TR4177	0	0	0	0	0	0	1	0	0	0	0	0	0	0	0	0	0	0	0	0	0	0	0	0	0	0	0	0	0	0	0	0	A	1	0	0	0	1	0	0	0	m	53	high	0	0	0	0
5060TR4180	0	0	0	1	0	0	0	1	0	0	1	0	1	0	0	0	0	0	0	0	0	0	1	0	0	1	0	0	0	0	1	0	N	0	0	0	0	0	0	0	1	f	59	high	1	0	0	0
5061TR4183	1	0	0	0	0	0	0	0	0	0	0	0	0	0	0	0	0	0	0	0	0	0	0	0	0	0	0	0	0	0	0	0	A	0	0	0	0	1	0	0	1	m	64	high	0	1	0	0
5065TR4189	1	0	0	0	0	0	0	0	0	0	0	0	0	0	0	0	0	0	0	0	0	0	0	0	0	0	0	0	0	0	0	0	N	0	0	0	0	0	0	0	0	m	35	high	0	0	0	0
5068TR4193	0	0	0	0	0	0	0	1	0	0	1	0	0	0	0	0	0	0	0	1	0	0	0	1	0	0	0	0	0	0	1	0	N	0	0	0	0	0	0	0	0	m	21	medium	2	0	0	0
5069TR4199	0	0	0	0	0	0	0	0	0	0	0	0	0	0	0	0	0	0	0	0	0	0	0	1	0	0	0	0	0	0	0	0	N	0	0	0	1	0	0	0	0	f	81	medium	1	0	0	0
5071TR4197	0	1	0	0	0	1	0	0	0	0	1	0	1	0	0	0	1	0	0	1	0	1	0	1	0	1	0	0	0	0	1	0	N	0	0	0	0	0	0	0	0	f	61	medium	2	0	0	0
5076TR4205	0	0	0	0	0	0	0	0	0	0	0	0	0	0	1	0	0	0	0	0	0	0	1	0	0	1	0	0	1	1	0	1	A	0	0	0	0	0	0	0	1	m	56	high	0	1	1	0
5082TR4209	0	0	0	0	0	0	0	0	0	0	0	0	0	0	1	0	0	0	0	0	0	0	0	0	0	0	0	0	0	0	0	0	N	0	0	0	0	0	0	0	0	f	65	low	2	0	0	0
5084TR4214	1	0	0	0	0	0	0	0	0	0	0	0	0	0	0	0	0	0	0	0	0	0	0	0	0	0	0	0	0	0	0	0	N	0	0	0	1	0	0	0	0	f	52	medium	0	0	0	0
5087TR4217	1	0	0	0	0	0	0	0	0	0	0	0	0	0	0	0	0	0	0	0	0	0	0	0	0	0	0	0	0	0	0	0	A	0	0	0	0	1	0	0	0	m	36	high	1	0	0	0
5088TR4220	0	0	0	0	0	0	0	0	0	0	0	0	0	0	0	0	0	0	0	1	0	0	1	0	0	0	0	0	0	1	0	0	A	0	0	0	0	0	0	0	0	m	55	high	1	1	0	0
5089TR4221	0	0	0	0	0	0	0	0	0	0	0	0	1	0	0	0	0	0	0	1	1	0	0	1	0	0	0	0	0	0	1	0	N	0	0	0	0	1	0	0	0	f	47	high	0	0	0	1
5095TR4223	0	0	0	0	0	0	1	0	0	1	0	0	0	1	1	0	0	0	0	0	0	0	1	1	0	1	0	0	0	0	1	0	N	0	1	0	0	1	0	0	0	f	64	high	7	0	0	0
5097TR4225	0	0	0	0	0	0	1	0	0	0	0	0	0	0	0	0	0	0	0	0	0	0	0	0	0	0	0	0	0	0	0	0	N	0	0	0	0	0	0	0	1	f	57	high	1	0	0	0
5098TR4226	0	0	0	0	0	0	0	0	0	0	0	0	0	0	1	0	0	0	0	0	0	0	0	0	0	0	0	0	0	0	0	0	N	0	0	0	0	0	0	0	0	f	61	high	0	0	0	0
5099TR4227	1	0	0	0	0	0	0	0	0	0	0	0	0	0	0	0	0	0	0	0	0	0	0	0	0	0	0	0	0	0	0	0	N	0	0	0	0	1	0	0	0	m	12	high	0	0	0	0
5102TR4231	0	0	0	0	0	0	0	0	0	0	0	0	0	0	0	0	0	0	0	0	0	0	0	0	0	0	0	0	0	0	1	0	N	0	0	0	0	0	0	0	0	f	71	medium	1	0	0	0
5104TR4237	1	0	0	0	0	0	0	0	0	0	0	0	0	0	0	0	0	0	0	0	0	0	0	0	0	0	0	0	0	0	0	0	N	0	0	0	0	1	0	0	1	m	69	high	0	0	0	0
5117TR4246	1	0	0	0	0	0	0	0	0	0	0	0	0	0	0	0	0	0	0	0	0	0	0	0	0	0	0	0	0	0	0	0	N	0	0	0	0	1	0	0	1	f	64	medium	0	0	0	0
5123TR4258	1	0	0	0	0	0	0	0	0	0	0	0	0	0	0	0	0	0	0	0	0	0	0	0	0	0	0	0	0	0	0	0	N	0	0	0	0	0	0	0	0	f	72	high	5	0	0	0
5125TR4257	0	0	0	0	0	0	0	0	0	0	0	0	1	0	0	0	0	0	0	0	0	0	0	0	0	0	0	0	0	0	1	0	N	0	0	0	0	1	0	0	0	m	69	high	1	0	0	0
5155TR4292	1	0	0	0	0	0	0	0	0	0	0	0	0	0	0	0	0	0	0	0	0	0	0	0	0	0	0	0	0	0	0	0	N	0	0	0	0	0	0	0	0	f	8	medium	0	0	0	0
5156TR4294	0	0	0	0	0	0	0	0	0	0	0	0	0	0	0	0	0	0	0	1	0	0	0	0	1	0	0	0	0	0	0	0	N	0	0	0	0	0	0	0	1	f	53	medium	0	0	0	0
5157TR4298	1	0	0	0	0	0	0	0	0	0	0	0	0	0	0	0	0	0	0	0	0	0	0	0	0	0	0	0	0	0	0	0	N	0	0	0	0	0	0	0	1	m	59	high	2	0	0	0
5159TR4295	1	0	0	0	0	0	0	0	0	0	0	0	0	0	0	0	0	0	0	0	0	0	0	0	0	0	0	0	0	0	0	0	N	0	0	0	0	0	0	0	0	f	11	high	0	0	0	0
5161TR4296	0	0	0	0	0	0	0	0	0	0	0	0	0	0	0	1	0	0	0	0	1	0	0	0	0	0	0	0	0	0	0	0	N	0	0	0	0	1	0	0	0	f	11	high	0	0	0	0
5163TR4300	1	0	0	0	0	0	0	0	0	0	0	0	0	0	0	0	0	0	0	0	0	0	0	0	0	0	0	0	0	0	0	0	N	0	0	0	1	0	0	0	1	f	10	high	0	0	0	0
5164TR4301	0	0	0	0	0	0	0	0	0	0	0	0	0	0	0	0	0	0	0	0	0	0	0	0	0	0	0	0	0	0	0	0	N	0	0	0	0	0	0	0	0	f	49	high	0	0	0	0
5172TR4311	1	0	0	0	0	0	0	0	0	0	0	0	0	0	0	0	0	0	0	0	0	0	0	0	0	0	0	0	0	0	0	0	A	0	0	0	0	1	0	0	1	m	57	high	0	0	0	0
5174TR4310	0	0	0	0	0	0	0	0	1	0	0	0	1	0	0	1	0	0	0	1	0	0	0	0	0	0	0	1	0	0	0	0	N	0	0	0	0	0	0	0	0	f	50	high	1	0	0	0
5184TR4326	1	0	0	0	0	0	0	0	0	0	0	0	0	0	0	0	0	0	0	0	0	0	0	0	0	0	0	0	0	0	0	0	N	0	0	0	0	0	0	0	1	f	73	high	1	0	0	0
5185TR4328	0	0	0	0	0	0	1	0	0	0	0	0	0	0	0	0	0	0	0	0	0	0	0	0	0	0	0	0	1	0	0	0	N	0	0	0	1	0	0	0	0	m	29	high	1	0	0	0
5186TR4329	0	0	0	0	0	0	0	0	0	0	0	0	0	0	0	0	0	0	0	1	0	0	1	0	0	0	0	0	1	0	0	0	N	0	0	0	0	0	0	0	0	f	53	high	0	0	0	0
5188TR4335	0	0	0	0	0	0	0	0	0	0	1	0	0	0	0	0	0	0	0	0	0	0	0	0	0	0	0	0	0	0	0	0	N	0	0	0	1	0	0	1	0	f	57	medium	0	0	0	0
5192TR4338	1	0	0	0	0	0	0	0	0	0	0	0	0	0	0	0	0	0	0	0	0	0	0	0	0	0	0	0	0	0	0	0	N	0	0	0	1	0	0	0	0	f	66	high	1	0	0	0
5193TR4341	1	0	0	0	0	0	0	0	0	0	0	0	0	0	0	0	0	0	0	0	0	0	0	0	0	0	0	0	0	0	0	0	N	0	0	0	0	0	0	0	0	f	60	high	2	0	0	1
5194TR4342	0	0	0	0	0	0	0	0	0	0	0	0	0	0	0	0	0	0	0	0	0	0	1	0	0	0	0	1	0	0	1	0	N	0	0	0	0	0	0	0	0	m	26	high	0	0	0	0
5195TR4344	0	0	0	0	0	0	0	0	0	0	0	0	0	0	1	0	0	0	0	0	0	0	0	0	0	0	0	0	1	0	0	0	N	0	0	0	1	0	0	0	0	m	65	high	0	0	0	0
5452TR2894a	0	0	0	0	1	0	1	0	0	0	0	0	0	0	0	0	0	0	0	0	0	0	0	0	0	0	0	0	0	0	0	0	N	0	0	0	1	0	0	0	0	f	48	medium	1	0	0	1
5926TR1249b	1	0	0	0	0	0	0	0	0	0	0	0	0	0	0	0	0	0	0	0	0	0	0	0	0	0	0	0	0	0	0	0	N	0	0	0	0	1	0	0	0	m	48	high	2	0	0	0
6086TR0157b	0	0	0	1	0	0	0	0	0	0	1	0	0	0	0	0	0	0	0	0	0	0	0	1	0	1	0	0	0	0	1	0	N	0	0	0	0	1	0	0	0	m	56	high	2	0	0	0
6131TR6966	1	0	0	0	0	0	0	0	0	0	0	0	0	0	0	0	0	0	0	0	0	0	0	0	0	0	0	0	0	0	0	0	N	1	0	0	0	0	0	0	1	f	43	high	0	0	0	0
6357TR5565	1	0	0	0	0	0	0	0	0	0	0	0	0	0	0	0	0	0	0	0	0	0	0	0	0	0	0	0	0	0	0	0	A	0	0	0	0	0	0	0	0	m	46	medium	0	0	0	0
6507TR1654b	0	0	0	1	0	0	0	1	0	0	0	0	0	0	0	0	0	0	0	0	0	0	1	0	0	0	0	0	0	0	1	0	A	0	0	0	0	1	0	0	0	m	70	high	2	0	0	0
6913TR0681a	0	0	0	0	0	0	0	0	0	0	0	0	0	0	0	0	0	0	1	0	0	0	0	0	0	0	0	0	1	0	0	0	N	0	0	0	0	0	0	0	0	m	63	high	1	1	2	0
6931TR6990	0	0	0	0	0	0	0	0	0	1	0	0	0	0	1	0	0	0	0	0	0	0	0	0	0	0	0	0	0	0	0	0	N	0	0	0	0	0	0	1	0	m	57	high	2	0	0	0
7089TR6768	0	0	0	0	1	0	0	0	0	0	0	0	0	0	0	0	0	0	0	0	0	0	0	0	0	0	0	0	0	0	1	0	N	0	0	0	0	0	0	0	0	m	4	high	0	0	0	0
7282TR6661	0	0	0	0	0	0	1	0	0	0	0	0	0	1	1	0	0	0	0	0	0	0	0	0	0	0	0	0	0	0	0	0	N	0	0	0	0	1	0	0	1	m	69	high	0	0	0	0
7320TR8032	0	0	0	0	0	1	0	0	0	0	0	1	0	1	0	0	0	0	0	0	0	1	0	1	0	0	0	0	0	0	0	0	N	0	0	0	0	1	0	0	0	m	71	high	1	0	0	0
7325TR6685	1	0	0	0	0	0	0	0	0	0	0	0	0	0	0	0	0	0	0	0	0	0	0	0	0	0	0	0	0	0	0	0	N	0	0	0	0	0	0	0	0	m	59	high	1	0	0	0
7329TR6687	1	0	0	0	0	0	0	0	0	0	0	0	0	0	0	0	0	0	0	0	0	0	0	0	0	0	0	0	0	0	0	0	N	0	0	0	0	0	0	0	1	f	5	medium	0	0	0	0
7335TR6690	0	0	0	0	0	0	0	0	0	0	0	0	0	0	0	0	0	0	0	0	0	0	1	1	0	0	0	0	0	0	0	1	N	0	0	0	0	0	0	0	0	f	64	high	3	0	0	0
7347TR6696	0	0	0	0	0	0	0	0	0	0	0	0	0	0	0	0	0	0	0	0	0	0	0	0	0	0	0	0	0	0	1	0	N	0	0	0	0	0	0	0	1	f	43	medium	0	0	0	0
7354TR6701	0	0	0	0	0	0	1	0	0	0	0	0	1	0	0	0	0	0	1	0	0	0	0	0	0	0	0	0	0	0	0	0	N	0	0	0	0	0	0	1	0	m	65	high	1	0	0	0
7357TR6704	0	0	0	0	0	1	0	0	0	0	0	0	1	0	0	0	0	0	0	0	0	0	0	0	1	0	0	0	0	0	1	0	N	0	0	0	0	0	0	0	0	f	52	high	2	0	0	0
7360TR6707	1	0	0	0	0	0	0	0	0	0	0	0	0	0	0	0	0	0	0	0	0	0	0	0	0	0	0	0	0	0	0	0	N	0	0	0	0	0	0	0	0	m	36	high	0	0	0	0
7363TR6710	1	0	0	0	0	0	0	0	0	0	0	0	0	0	0	0	0	0	0	0	0	0	0	0	0	0	0	0	0	0	0	0	N	0	0	0	0	0	0	0	0	f	50	medium	1	0	0	0
7366TR6724	1	0	0	0	0	0	0	0	0	0	0	0	0	0	0	0	0	0	0	0	0	0	0	0	0	0	0	0	0	0	0	0	N	0	0	0	0	0	0	0	0	m	54	medium	2	0	0	0
7367TR6748	0	0	0	0	0	0	0	0	0	0	1	0	0	0	0	0	0	0	0	0	0	0	0	0	0	0	0	0	1	1	1	0	A	0	0	0	1	0	0	0	0	m	59	high	1	0	0	0
7377TR6739	0	0	0	0	0	0	0	0	0	0	0	0	0	0	0	0	0	0	0	0	0	0	1	0	0	0	0	0	0	1	0	0	A	0	0	0	0	0	0	0	1	m	75	high	2	0	0	0
7381TR6745	0	0	0	0	0	0	0	0	0	0	0	0	0	0	0	0	0	0	0	0	0	0	0	1	0	0	0	0	0	0	0	0	N	0	0	0	0	0	0	0	0	m	62	high	0	0	0	0
7390TR6754	0	0	0	0	0	0	0	0	0	0	0	0	0	0	0	0	0	0	0	0	0	0	0	1	1	0	0	0	0	0	0	0	N	0	0	0	0	1	0	0	0	f	38	high	0	0	0	0
7391TR6755	0	0	0	0	0	0	0	0	0	0	0	0	1	0	0	0	0	0	0	0	0	0	0	0	0	0	0	0	0	0	1	0	N	0	0	0	0	0	0	1	0	f	53	high	3	0	0	0
7395TR6758	0	0	0	0	0	0	1	0	0	0	0	0	0	0	0	1	0	0	0	0	0	0	0	0	0	0	0	0	0	0	0	0	N	0	0	0	0	0	0	0	1	m	5	high	1	0	0	0
7397TR6761	1	0	0	0	0	0	0	0	0	0	0	0	0	0	0	0	0	0	0	0	0	0	0	0	0	0	0	0	0	0	0	0	N	0	0	0	0	1	0	0	0	f	72	high	0	0	0	0
7402TR6766	1	0	0	0	0	0	0	0	0	0	0	0	0	0	0	0	0	0	0	0	0	0	0	0	0	0	0	0	0	0	0	0	N	0	0	0	0	0	0	1	1	f	37	high	1	0	0	0
7403TR6767	0	0	0	0	0	0	0	0	0	0	0	0	1	0	0	0	0	0	0	0	0	0	0	0	0	0	0	0	0	0	1	0	N	0	0	0	0	0	0	0	1	f	40	high	2	0	0	0
7405TR6769	1	0	0	0	0	0	0	0	0	0	0	0	0	0	0	0	0	0	0	0	0	0	0	0	0	0	0	0	0	0	0	0	N	0	0	0	0	0	0	0	0	f	19	medium	0	0	0	0
7411TR6773	0	0	0	0	0	1	0	0	0	0	0	0	1	0	0	0	0	0	0	0	1	0	0	1	0	0	0	0	0	0	0	0	N	0	0	0	1	0	0	0	1	f	48	high	1	1	1	0
7412TR6772	1	0	0	0	0	0	0	0	0	0	0	0	0	0	0	0	0	0	0	0	0	0	0	0	0	0	0	0	0	0	0	0	N	0	0	0	1	0	0	0	1	f	39	high	1	0	0	0
7418TR6778	0	0	0	0	0	0	0	0	0	0	0	0	0	1	0	0	0	0	0	0	0	0	0	1	0	0	0	0	0	0	0	0	A	0	0	0	0	0	0	0	0	m	27	high	1	0	0	0
7426TR6785	1	0	0	0	0	0	0	0	0	0	0	0	0	0	0	0	0	0	0	0	0	0	0	0	0	0	0	0	0	0	0	0	N	0	0	0	0	0	0	0	0	m	54	high	0	0	0	0
7427TR6787	0	0	0	0	0	0	1	0	0	0	1	0	0	0	0	0	0	0	1	0	1	0	0	0	0	0	0	0	0	0	0	0	A	0	0	0	0	1	0	0	0	m	35	high	0	0	0	0
7429TR6789	1	0	0	0	0	0	0	0	0	0	0	0	0	0	0	0	0	0	0	0	0	0	0	0	0	0	0	0	0	0	0	0	N	0	0	0	0	0	0	0	0	m	34	high	0	0	0	0
7430TR6790	1	0	0	0	0	0	0	0	0	0	0	0	0	0	0	0	0	0	0	0	0	0	0	0	0	0	0	0	0	0	0	0	N	0	0	0	0	0	0	0	0	m	63	high	1	0	0	0
7433TR6793	1	0	0	0	0	0	0	0	0	0	0	0	0	0	0	0	0	0	0	0	0	0	0	0	0	0	0	0	0	0	0	0	N	0	0	0	0	1	0	0	0	m	66	high	0	0	0	0
7434TR6794	0	0	0	0	0	0	0	0	0	0	0	0	0	0	0	0	0	0	0	0	0	0	0	0	0	0	0	0	0	0	0	0	N	0	0	0	1	0	0	0	0	m	53	high	1	0	0	0
7440TR6798	0	0	0	0	0	0	0	0	0	0	0	0	0	0	0	1	0	0	0	0	0	1	0	0	0	0	0	0	0	0	0	0	N	0	0	0	0	1	0	0	0	m	3	low	0	0	0	0
7441TR7079	1	0	0	0	0	0	0	0	0	0	0	0	0	0	0	0	0	0	0	0	0	0	0	0	0	0	0	0	0	0	0	0	N	0	0	0	1	0	0	0	1	f	46	high	0	0	0	0
7442TR6799	1	0	0	0	0	0	0	0	0	0	0	0	0	0	0	0	0	0	0	0	0	0	0	0	0	0	0	0	0	0	0	0	N	0	0	0	0	0	0	0	0	m	12	high	0	0	0	0
7445TR6801	1	0	0	0	0	0	0	0	0	0	0	0	0	0	0	0	0	0	0	0	0	0	0	0	0	0	0	0	0	0	0	0	N	0	0	0	0	0	0	0	0	f	66	high	1	0	0	0
7451TR6807	0	0	0	0	0	0	0	0	0	0	0	0	0	0	0	1	0	0	0	0	0	0	0	0	0	0	0	0	0	0	0	0	N	0	0	0	0	1	0	0	0	m	5	high	0	0	0	0
7454TR6812	0	0	0	0	0	0	0	0	0	0	0	0	0	1	1	0	0	0	0	0	0	0	0	0	0	0	0	0	0	0	0	0	N	0	0	0	1	0	0	0	0	m	45	high	0	0	0	0
7464TR6826	1	0	0	0	0	0	0	0	0	0	0	0	0	0	0	0	0	0	0	0	0	0	0	0	0	0	0	0	0	0	0	0	A	0	0	0	1	0	0	0	0	m	74	medium	0	0	0	0
7472TR6835	0	0	0	0	0	0	0	0	0	0	0	0	0	0	0	0	0	0	0	0	1	0	0	0	0	0	0	0	0	0	0	0	N	0	0	0	1	1	0	0	1	f	23	high	0	0	0	0
7473TR6834	1	0	0	0	0	0	0	0	0	0	0	0	0	0	0	0	0	0	0	0	0	0	0	0	0	0	0	0	0	0	0	0	N	0	0	0	0	0	0	1	0	f	9	high	0	0	0	0
7474TR6837	1	0	0	0	0	0	0	0	0	0	0	0	0	0	0	0	0	0	0	0	0	0	0	0	0	0	0	0	0	0	0	0	N	0	0	0	1	0	0	0	0	f	60	high	0	1	0	0
7480TR6841	0	0	0	0	0	0	0	0	0	0	0	0	0	0	0	0	0	0	0	0	0	0	1	0	0	0	0	0	0	0	0	0	A	1	0	0	0	1	0	0	1	f	63	high	1	0	0	0
7483TR6844	1	0	0	0	0	0	0	0	0	0	0	0	0	0	0	0	0	0	0	0	0	0	0	0	0	0	0	0	0	0	0	0	N	1	0	0	0	1	0	0	1	f	68	medium	0	0	0	0
7484TR6845	1	0	0	0	0	0	0	0	0	0	0	0	0	0	0	0	0	0	0	0	0	0	0	0	0	0	0	0	0	0	0	0	A	0	0	0	0	1	0	0	0	m	39	high	0	0	0	0
7487TR6851	1	0	0	0	0	0	0	0	0	0	0	0	0	0	0	0	0	0	0	0	0	0	0	0	0	0	0	0	0	0	0	0	N	0	0	0	0	1	0	0	0	f	48	high	0	0	0	0
7492TR6857	0	0	0	0	0	0	0	0	0	0	1	0	0	0	0	0	0	0	1	0	0	0	0	0	0	0	0	0	0	0	0	0	N	0	0	0	0	1	0	0	0	f	31	high	0	0	0	0
7498TR6861	1	0	0	0	0	0	0	0	0	0	0	0	0	0	0	0	0	0	0	0	0	0	0	0	0	0	0	0	0	0	0	0	A	0	0	0	0	1	0	0	1	f	9	high	0	0	0	0
7499TR6863	1	0	0	0	0	0	0	0	0	0	0	0	0	0	0	0	0	0	0	0	0	0	0	0	0	0	0	0	0	0	0	0	N	0	0	0	0	0	0	1	0	m	41	high	0	0	0	0
7500TR6864	1	0	0	0	0	0	0	0	0	0	0	0	0	0	0	0	0	0	0	0	0	0	0	0	0	0	0	0	0	0	0	0	N	0	0	0	1	0	0	0	0	f	6	medium	0	0	0	0
7504TR6871	0	0	0	0	0	0	0	0	0	0	1	0	0	1	0	0	0	0	0	0	1	1	0	0	0	0	0	0	0	0	0	0	N	0	0	0	1	1	0	0	0	f	65	medium	2	0	0	0
7508TR6883	0	0	0	0	1	1	1	1	0	0	0	1	1	0	0	0	0	0	0	1	0	0	0	0	0	1	0	0	0	1	1	0	N	1	0	0	0	1	0	0	0	f	62	high	0	0	0	0
7511TR6888	1	0	0	0	0	0	0	0	0	0	0	0	0	0	0	0	0	0	0	0	0	0	0	0	0	0	0	0	0	0	0	0	A	0	0	0	1	1	0	1	1	f	75	medium	1	0	0	0
7512TR6887	1	0	0	0	0	0	0	0	0	0	0	0	0	0	0	0	0	0	0	0	0	0	0	0	0	0	0	0	0	0	0	0	A	0	0	0	0	1	0	0	0	m	38	high	0	0	0	0
7519TR6894	0	0	0	0	0	0	0	0	0	0	0	0	0	0	0	0	0	0	0	0	0	0	1	0	0	0	0	0	1	0	0	0	N	0	0	0	0	1	1	0	0	f	71	high	6	1	0	0
7520TR6895	0	0	0	0	0	0	1	0	0	0	0	0	0	0	1	0	0	0	0	0	0	0	0	1	0	0	0	0	0	1	0	0	N	0	0	0	1	0	0	0	0	f	61	high	1	0	0	0
7524TR6901	1	0	0	0	0	0	0	0	0	0	0	0	0	0	0	0	0	0	0	0	0	0	0	0	0	0	0	0	0	0	0	0	N	0	0	0	1	0	0	0	0	m	53	low	0	0	0	0
7526TR6902	0	0	0	1	1	0	1	0	0	0	1	0	1	1	0	0	0	0	1	1	0	0	0	1	0	1	0	0	1	1	1	0	A	0	0	0	0	0	1	0	0	m	28	high	0	0	0	0
7527TR6903	1	0	0	0	0	0	0	0	0	0	0	0	0	0	0	0	0	0	0	0	0	0	0	0	0	0	0	0	0	0	0	0	N	1	0	0	0	1	0	0	0	m	42	high	0	0	0	0
7529TR6905	0	0	0	0	0	0	0	0	0	0	0	0	0	0	0	0	0	0	0	0	0	0	0	1	0	0	0	0	0	0	0	0	A	0	0	0	0	0	0	0	1	f	50	high	0	0	0	0
7531TR6909	0	0	0	0	0	0	1	0	0	0	0	0	0	0	0	0	0	0	0	0	0	0	0	0	0	0	0	0	1	0	0	0	N	0	0	0	0	0	0	1	0	m	62	medium	1	0	0	0
7535TR6910	0	0	0	0	1	0	0	0	0	0	0	0	0	0	0	0	0	0	0	0	0	0	0	0	0	0	0	0	0	0	0	0	N	0	0	0	1	0	0	0	0	f	33	high	2	0	0	0
7540TR6917	1	0	0	0	0	0	0	0	0	0	0	0	0	0	0	0	0	0	0	0	0	0	0	0	0	0	0	0	0	0	0	0	N	0	0	0	1	1	0	1	0	f	10	medium	0	0	0	0
7546TR6927	0	0	0	0	0	0	0	0	0	0	1	0	0	0	0	0	0	0	0	1	0	0	0	0	0	0	0	0	0	0	0	0	A	1	0	0	0	0	0	0	0	f	35	high	0	0	0	0
7551TR6929	1	0	0	0	0	0	0	0	0	0	0	0	0	0	0	0	0	0	0	0	0	0	0	0	0	0	0	0	0	0	0	0	N	0	0	0	0	0	0	0	0	m	65	high	0	0	0	0
7557TR6934	0	0	0	0	0	0	0	0	0	0	0	0	0	0	0	0	0	0	0	0	0	0	0	0	0	0	0	0	0	0	1	0	N	0	0	0	0	0	0	0	0	f	46	high	1	0	0	0
7560TR6938	1	0	0	0	0	0	0	0	0	0	0	0	0	0	0	0	0	0	0	0	0	0	0	0	0	0	0	0	0	0	0	0	N	0	0	0	0	0	0	0	0	f	68	medium	0	0	0	0
7562TR6941	0	0	0	0	0	0	0	0	0	0	0	0	0	0	0	0	0	0	0	0	0	0	0	0	0	0	0	1	0	0	0	0	N	0	0	0	0	1	0	0	0	f	63	high	1	0	0	0
7565TR6943	1	0	0	0	0	0	0	0	0	0	0	0	0	0	0	0	0	0	0	0	0	0	0	0	0	0	0	0	0	0	0	0	N	0	0	0	1	0	0	0	0	f	6	high	0	0	0	0
7566TR6945	1	0	0	0	0	0	0	0	0	0	0	0	0	0	0	0	0	0	0	0	0	0	0	0	0	0	0	0	0	0	0	0	A	0	0	0	0	0	0	0	0	m	50	high	0	0	0	0
7567TR6946	1	0	0	0	0	0	0	0	0	0	0	0	0	0	0	0	0	0	0	0	0	0	0	0	0	0	0	0	0	0	0	0	A	0	0	0	0	1	0	0	1	m	54	high	0	0	0	0
7572TR6949	0	0	0	0	0	0	0	0	0	0	0	0	0	0	0	0	0	0	0	1	0	0	0	0	0	0	0	0	0	1	0	0	N	0	0	0	1	0	0	1	0	f	54	high	1	0	0	0
7575TR6956	0	0	0	1	0	0	0	0	0	0	1	0	1	0	1	1	1	0	1	0	1	0	1	0	0	1	0	0	0	0	1	0	N	0	0	0	0	1	0	0	0	f	22	high	2	0	0	0
7578TR6959	0	0	0	1	0	0	0	0	0	0	0	0	0	0	0	1	0	0	0	0	0	0	0	0	0	0	0	0	0	0	0	0	N	0	0	0	0	0	0	0	0	m	67	high	0	1	0	0
7580TR6964	1	0	0	0	0	0	0	0	0	0	0	0	0	0	0	0	0	0	0	0	0	0	0	0	0	0	0	0	0	0	0	0	N	0	0	0	0	0	0	1	0	m	46	high	0	0	0	0
7584TR6981	0	0	0	0	0	0	1	0	0	0	0	0	1	0	0	1	0	0	1	0	0	0	0	0	0	0	0	0	0	0	0	0	N	0	0	0	0	0	0	0	0	f	12	high	1	0	0	0
7591TR6987	1	0	0	0	0	0	0	0	0	0	0	0	0	0	0	0	0	0	0	0	0	0	0	0	0	0	0	0	0	0	0	0	N	0	0	0	0	0	0	0	0	m	2	low	1	0	0	0
7594TR6991	0	0	0	0	0	0	0	0	0	0	1	0	1	0	0	0	0	0	0	0	0	0	0	0	0	0	0	0	1	0	0	0	N	0	0	0	0	0	0	0	0	m	44	high	0	0	0	0
7602TR6998	0	1	0	0	0	0	0	0	0	0	0	0	0	0	0	0	0	0	0	0	0	0	0	0	1	0	0	1	0	0	0	0	A	0	0	0	0	0	0	0	1	m	40	medium	3	0	0	0
7606TR7000	0	0	0	0	0	0	0	0	0	0	0	0	0	0	1	0	0	0	0	0	0	0	0	0	0	0	0	0	0	0	0	0	A	0	0	0	0	0	0	0	1	m	73	high	0	0	0	0
7608TR7002	0	0	0	1	0	0	0	0	0	0	0	0	0	0	0	0	0	0	0	1	0	0	0	0	0	0	0	0	0	0	1	0	N	0	0	0	0	0	0	0	1	f	57	high	4	0	0	0
7610TR7003	1	0	0	0	0	0	0	0	0	0	0	0	0	0	0	0	0	0	0	0	0	0	0	0	0	0	0	0	0	0	0	0	A	0	0	0	0	0	0	0	0	m	70	medium	2	0	0	0
7612TR7007	1	0	0	0	0	0	0	0	0	0	0	0	0	0	0	0	0	0	0	0	0	0	0	0	0	0	0	0	0	0	0	0	N	0	0	0	0	1	0	0	0	m	61	high	2	0	0	0
7614TR7010	1	0	0	0	0	0	0	0	0	0	0	0	0	0	0	0	0	0	0	0	0	0	0	0	0	0	0	0	0	0	0	0	N	0	0	0	0	0	1	0	0	m	37	high	0	0	0	0
7617TR7016	0	0	0	0	0	0	0	0	0	0	1	0	0	0	0	0	0	0	0	0	0	0	0	0	0	0	0	0	0	0	1	0	A	0	0	0	0	0	1	0	0	m	71	high	4	0	0	1
7618TR7017	0	0	0	0	0	0	0	0	0	0	0	0	1	0	0	0	0	0	0	0	0	0	0	0	0	0	0	0	0	0	0	0	N	0	0	0	0	1	1	0	0	f	42	medium	1	0	0	0
7621TR7027	1	0	0	0	0	0	0	0	0	0	0	0	0	0	0	0	0	0	0	0	0	0	0	0	0	0	0	0	0	0	0	0	N	0	0	0	1	0	0	0	0	m	38	medium	1	0	0	0
7622TR7031	1	0	0	0	0	0	0	0	0	0	0	0	0	0	0	0	0	0	0	0	0	0	0	0	0	0	0	0	0	0	0	0	N	0	0	0	0	0	0	0	0	f	63	high	0	0	0	0
7625TR7034	0	1	0	0	0	0	0	0	0	0	0	0	1	0	0	0	0	0	0	0	0	0	0	0	1	0	0	1	0	0	1	0	A	0	0	0	0	0	0	0	1	f	41	high	1	0	0	0
7627TR7036	0	0	0	0	0	0	0	0	0	0	1	0	1	0	0	1	0	0	0	0	0	0	0	0	0	0	0	0	0	0	0	0	N	0	0	0	0	0	0	0	0	m	8	high	0	0	0	0
7629TR7039	1	0	0	0	0	0	0	0	0	0	0	0	0	0	0	0	0	0	0	0	0	0	0	0	0	0	0	0	0	0	0	0	N	0	0	0	0	0	0	0	1	f	64	medium	0	1	0	0
7630TR7040	0	1	0	0	1	1	0	1	0	0	0	0	1	1	1	0	1	0	1	1	1	1	1	1	1	1	1	1	1	1	0	1	N	0	0	0	1	0	0	0	0	m	60	medium	1	0	0	0
7631TR7041	1	0	0	0	0	0	0	0	0	0	0	0	0	0	0	0	0	0	0	0	0	0	0	0	0	0	0	0	0	0	0	0	N	0	0	0	0	0	0	0	0	m	45	high	0	0	0	0
7633TR7042	0	0	0	0	0	0	0	0	0	0	1	0	0	0	0	1	0	0	0	0	0	0	0	0	0	0	0	0	0	0	0	0	N	0	0	0	0	0	0	0	0	m	4	high	0	0	0	0
7635TR7046	1	0	0	0	0	0	0	0	0	0	0	0	0	0	0	0	0	0	0	0	0	0	0	0	0	0	0	0	0	0	0	0	N	0	0	0	0	0	1	0	1	f	61	high	0	0	0	0
7636TR7047	1	0	0	0	0	0	0	0	0	0	0	0	0	0	0	0	0	0	0	0	0	0	0	0	0	0	0	0	0	0	0	0	A	0	0	0	0	0	0	0	1	f	49	medium	0	0	0	0
7638TR7051	0	0	0	0	0	0	0	0	0	0	0	0	1	0	0	0	0	0	0	0	0	0	0	1	0	0	0	0	0	0	1	0	A	0	0	0	0	0	0	0	0	f	18	medium	0	0	0	0
7641TR7053	0	0	0	1	0	0	0	1	0	0	0	1	0	0	0	0	1	0	0	1	1	0	1	1	1	1	0	1	1	1	1	1	N	0	0	0	0	0	0	0	0	f	50	medium	4	0	0	0
7642TR7054	1	0	0	0	0	0	0	0	0	0	0	0	0	0	0	0	0	0	0	0	0	0	0	0	0	0	0	0	0	0	0	0	A	0	0	0	0	0	0	0	0	m	67	low	1	0	0	0
7644TR7056	0	0	0	0	0	0	0	0	0	0	0	0	1	0	0	0	0	0	0	0	0	0	0	1	0	0	0	0	0	0	0	0	N	0	0	0	0	0	0	0	0	f	53	low	1	0	0	0
7645TR7057	0	0	0	0	1	0	1	0	0	0	0	0	0	0	0	0	0	0	0	0	0	0	0	0	0	0	0	0	0	0	0	0	N	0	0	0	0	1	0	0	1	m	65	high	0	0	0	0
7652TR7060	0	0	0	0	0	0	0	0	0	0	0	0	0	0	0	0	0	0	0	0	0	0	0	0	0	0	0	0	0	0	0	0	N	0	0	0	0	0	0	0	1	f	46	medium	0	0	0	0
7660TR7068	1	0	0	0	0	0	0	0	0	0	0	0	0	0	0	0	0	0	0	0	0	0	0	0	0	0	0	0	0	0	0	0	N	0	0	0	0	1	0	0	0	m	51	high	0	0	0	0
7671TR7077	1	0	0	0	0	0	0	0	0	0	0	0	0	0	0	0	0	0	0	0	0	0	0	0	0	0	0	0	0	0	0	0	A	0	0	0	0	0	0	0	0	f	58	medium	0	0	0	0
7676TR7083	0	0	0	0	0	0	1	0	0	0	0	0	0	0	0	0	0	0	0	0	0	0	0	0	0	0	0	0	0	0	0	0	N	0	0	0	0	0	0	0	0	m	3	high	1	0	0	0
7681TR7088	1	0	0	0	0	0	0	0	0	0	0	0	0	0	0	0	0	0	0	0	0	0	0	0	0	0	0	0	0	0	0	0	A	0	0	0	0	0	0	0	0	m	57	high	1	1	0	0
7687TR7097	0	0	0	1	1	1	1	1	0	0	1	0	0	1	1	0	1	0	1	0	1	1	1	1	0	1	0	1	1	0	1	1	N	0	0	0	0	0	0	0	0	m	36	medium	2	0	0	0
7688TR7098	0	0	0	0	0	0	0	0	0	0	0	0	0	0	1	0	0	0	0	0	1	0	0	0	0	0	0	0	0	0	0	0	N	0	0	0	0	0	0	0	1	m	75	high	0	1	0	0
7689TR7100	1	0	0	0	0	0	0	0	0	0	0	0	0	0	0	0	0	0	0	0	0	0	0	0	0	0	0	0	0	0	0	0	N	0	0	0	0	0	0	0	0	m	58	medium	1	0	0	0
7690TR7101	0	0	0	0	0	0	0	0	0	0	0	0	1	0	0	0	0	0	0	0	0	0	0	0	0	0	0	0	0	0	1	0	N	0	0	0	0	0	0	0	0	m	35	high	0	0	0	0
7693TR7106	0	0	0	0	1	0	0	0	0	0	0	0	0	0	0	1	0	0	1	0	0	0	0	0	0	0	0	0	0	1	1	0	N	0	0	0	0	0	0	1	0	f	35	medium	0	0	0	0
7695TR7107	0	0	0	1	0	1	0	0	0	0	0	0	0	1	0	0	0	0	0	0	0	1	1	0	1	0	0	1	0	0	1	0	A	0	0	0	0	1	0	0	0	m	62	medium	0	0	0	0
7696TR7108	1	0	0	0	0	0	0	0	0	0	0	0	0	0	0	0	0	0	0	0	0	0	0	0	0	0	0	0	0	0	0	0	A	0	1	0	0	0	0	0	0	f	47	medium	0	0	0	0
7698TR7115	0	0	0	0	0	0	0	0	0	0	0	0	0	0	0	0	0	0	0	0	0	0	1	0	0	0	0	0	0	0	0	0	N	0	0	0	0	0	0	0	0	f	42	high	0	0	0	0
7699TR7118	0	0	0	1	0	1	0	0	0	0	0	0	1	1	1	1	0	0	0	0	1	0	1	0	1	1	0	1	1	1	1	0	A	0	0	0	0	0	0	1	0	m	55	high	3	0	0	0
7700TR7160	1	0	0	0	0	0	0	0	0	0	0	0	0	0	0	0	0	0	0	0	0	0	0	0	0	0	0	0	0	0	0	0	A	0	0	0	0	1	0	0	0	m	48	high	0	0	0	0
7704TR7123	0	0	0	0	0	0	0	0	0	0	0	0	0	0	1	0	0	0	0	1	0	0	0	0	0	0	0	0	0	0	0	0	A	0	0	0	0	1	0	0	0	m	56	high	0	0	0	0
7709TR7131	0	0	0	0	0	0	0	0	0	0	1	0	1	0	0	1	0	0	0	0	0	1	0	0	0	0	0	0	0	0	1	0	N	0	0	0	0	0	1	0	0	f	11	high	0	1	1	0
7712TR7135	0	0	0	0	0	0	0	0	0	0	0	0	0	0	0	0	0	0	0	0	0	0	0	1	0	0	0	0	0	0	1	1	N	0	0	0	0	1	0	0	0	f	53	high	4	0	0	1	1
7714TR7139	1	0	0	0	0	0	0	0	0	0	0	0	0	0	0	0	0	0	0	0	0	0	0	0	0	0	0	0	0	0	0	0	A	0	0	0	0	0	0	0	0	m	52	high	0	0	0	0
7715TR7140	0	0	0	0	0	0	0	0	0	1	0	0	0	0	0	0	1	0	0	0	0	0	0	1	0	1	0	0	1	1	0	0	N	0	0	0	0	0	0	0	0	f	56	high	0	1	0	0
7717TR7144	0	0	0	0	0	0	0	0	0	0	0	0	0	0	0	0	0	0	0	0	0	0	0	0	0	0	0	0	0	0	0	0	N	0	0	0	0	1	0	0	0	m	39	medium	0	0	0	0
7720TR7149	0	0	0	0	0	0	0	0	0	0	0	0	1	1	0	0	0	0	0	0	0	0	0	0	1	0	0	0	0	0	1	0	N	0	0	0	0	0	0	1	0	m	52	high	1	0	0	0
7722TR7156	1	0	0	0	0	0	0	0	0	0	0	0	0	0	0	0	0	0	0	0	0	0	0	0	0	0	0	0	0	0	0	0	N	0	0	0	0	0	0	0	0	m	60	medium	3	0	0	0
7724TR7153	0	0	0	0	0	0	0	0	0	0	0	0	0	1	1	0	0	0	0	0	0	0	0	0	0	0	0	0	0	0	0	0	N	0	0	0	1	0	0	0	0	f	17	high	1	0	0	0
7729TR7159	0	0	0	0	0	0	0	0	0	0	0	0	0	0	0	0	0	0	0	0	0	0	0	0	0	0	0	0	0	0	1	0	N	0	0	0	1	1	0	0	0	f	17	medium	0	0	0	0
7731TR7163	0	0	0	0	0	1	0	1	0	0	0	0	1	0	0	0	1	0	0	0	0	0	0	0	0	0	0	0	1	1	1	0	A	0	0	0	0	1	0	0	0	m	44	medium	1	0	0	0
7732TR7235	0	0	0	0	0	0	1	0	0	0	0	0	0	0	0	0	0	0	0	0	0	0	0	0	0	0	0	0	0	0	0	0	N	0	0	0	1	0	0	0	1	m	16	high	0	0	0	0
7733TR7168	0	0	0	1	1	0	0	0	0	0	1	0	0	0	0	1	0	0	0	0	0	0	0	0	0	0	0	0	0	0	1	0	N	0	0	0	0	1	0	0	1	m	7	high	0	0	0	0
7736TR7171	1	0	0	0	0	0	0	0	0	0	0	0	0	0	0	0	0	0	0	0	0	0	0	0	0	0	0	0	0	0	0	0	N	0	0	0	1	1	0	0	1	m	65	medium	0	0	0	0
7737TR7173	0	0	0	0	1	0	0	0	0	0	0	0	0	0	0	0	0	0	0	0	1	0	0	0	0	0	0	0	0	0	1	0	N	0	0	0	0	0	0	0	0	m	48	high	1	0	0	0
7740TR7174	0	0	0	0	0	1	0	1	0	0	0	0	1	0	0	0	0	0	0	0	0	0	0	0	1	0	0	0	1	0	0	0	N	0	0	0	1	0	0	0	0	f	25	medium	0	0	0	0
7742TR7176	1	0	0	0	0	0	0	0	0	0	0	0	0	0	0	0	0	0	0	0	0	0	0	0	0	0	0	0	0	0	0	0	A	0	0	0	0	1	0	0	0	m	48	medium	0	0	0	0
7743TR7178	0	0	0	0	0	0	0	0	0	0	0	0	0	0	0	0	0	0	0	0	0	0	0	0	0	1	0	0	0	0	0	1	A	0	0	0	1	0	0	0	1	f	72	high	1	0	0	0
7745TR7177	1	0	0	0	0	0	0	0	0	0	0	0	0	0	0	0	0	0	0	0	0	0	0	0	0	0	0	0	0	0	0	0	N	0	0	0	1	0	0	0	0	f	2	low	0	0	0	0
7746TR7182	0	0	0	0	0	0	0	1	0	1	0	0	0	0	0	0	0	0	0	1	0	0	0	0	0	0	0	0	0	0	1	0	N	0	0	0	0	0	1	0	1	f	60	low	0	1	1	0
7749TR7186	0	0	0	0	0	1	0	1	0	0	0	0	0	0	0	0	0	0	0	0	0	0	0	0	0	0	0	0	0	0	1	0	N	0	0	0	0	0	0	0	0	m	32	high	0	0	0	0
7752TR7190	0	0	0	0	0	0	0	0	0	0	0	0	0	1	0	0	0	0	0	0	0	0	0	0	0	0	0	0	0	0	0	0	N	1	0	0	0	0	0	0	0	m	7	high	0	0	0	0
7754TR7191	1	0	0	0	0	0	0	0	0	0	0	0	0	0	0	0	0	0	0	0	0	0	0	0	0	0	0	0	0	0	0	0	N	0	0	0	0	1	0	0	0	f	33	high	1	0	0	0
7755TR7193	0	0	0	0	0	0	0	0	0	0	0	0	0	0	0	0	0	0	0	0	0	0	0	0	0	0	0	0	0	0	1	0	A	0	0	0	0	0	0	1	1	f	45	high	1	0	0	0
7757TR7195	1	0	0	0	0	0	0	0	0	0	0	0	0	0	0	0	0	0	0	0	0	0	0	0	0	0	0	0	0	0	0	0	A	0	0	0	0	1	0	0	0	m	56	high	0	0	0	0
7763TR7200	0	0	0	1	1	1	0	1	0	0	0	0	0	0	0	0	0	0	0	0	1	0	0	0	1	0	0	1	0	0	1	0	A	0	0	0	1	0	0	0	1	m	11	high	1	0	0	0
7767TR7205	1	0	0	0	0	0	0	0	0	0	0	0	0	0	0	0	0	0	0	0	0	0	0	0	0	0	0	0	0	0	0	0	N	0	0	0	0	0	0	0	0	m	7	high	0	0	0	0
7769TR7207	1	0	0	0	0	0	0	0	0	0	0	0	0	0	0	0	0	0	0	0	0	0	0	0	0	0	0	0	0	0	0	0	N	1	0	0	0	0	0	0	0	m	48	high	1	0	0	0
7771TR7214	0	0	0	0	0	0	0	0	0	0	0	0	1	0	0	0	0	0	0	0	0	0	0	0	0	0	0	0	0	0	0	0	N	0	0	0	0	0	0	0	1	m	64	high	0	0	0	0
7774TR7211	0	0	0	0	1	0	0	0	1	0	0	0	1	0	0	1	0	0	0	0	0	0	0	0	0	0	0	0	0	0	1	0	A	0	0	0	0	0	0	0	0	f	5	high	0	0	0	0
7775TR7212	1	0	0	0	0	0	0	0	0	0	0	0	0	0	0	0	0	0	0	0	0	0	0	0	0	0	0	0	0	0	0	0	N	0	0	0	0	0	0	0	0	f	6	medium	0	0	0	0
7777TR7213	1	0	0	0	0	0	0	0	0	0	0	0	0	0	0	0	0	0	0	0	0	0	0	0	0	0	0	0	0	0	0	0	A	0	0	0	0	0	0	0	0	m	9	medium	3	0	0	0
7778TR7215	0	0	0	0	0	0	1	0	0	0	1	0	0	0	0	0	0	0	1	0	0	0	0	0	0	0	0	0	0	0	0	0	N	0	0	0	0	0	0	0	1	f	48	high	0	0	0	0
7783TR7223	0	0	0	0	0	0	1	0	0	0	0	0	0	0	0	0	0	0	0	0	0	0	0	0	0	0	0	0	0	0	0	0	N	0	0	0	0	0	0	0	0	m	63	high	1	0	0	0
7786TR7225	1	0	0	0	0	0	0	0	0	0	0	0	0	0	0	0	0	0	0	0	0	0	0	0	0	0	0	0	0	0	0	0	N	0	0	0	0	0	0	0	0	m	45	high	0	0	0	0
7788TR7226	0	0	0	0	0	0	0	0	0	0	0	0	1	0	0	0	0	0	0	0	0	0	0	0	0	0	0	0	0	0	0	0	N	0	0	0	0	0	0	0	0	m	13	medium	0	0	0	0
7791TR7230	1	0	0	0	0	0	0	0	0	0	0	0	0	0	0	0	0	0	0	0	0	0	0	0	0	0	0	0	0	0	0	0	N	0	0	0	0	0	0	1	0	f	0	low	0	0	0	0
7792TR7231	0	0	0	0	0	0	0	0	0	0	0	0	0	0	0	0	0	0	0	1	0	0	0	0	0	0	0	0	0	0	0	0	N	0	0	0	0	1	1	1	1	f	59	medium	1	0	0	0
7793TR7232	1	0	0	0	0	0	0	0	0	0	0	0	0	0	0	0	0	0	0	0	0	0	0	0	0	0	0	0	0	0	0	0	N	0	0	0	0	0	1	0	1	m	62	medium	1	0	0	0
7794TR7233	1	0	0	0	0	0	0	0	0	0	0	0	0	0	0	0	0	0	0	0	0	0	0	0	0	0	0	0	0	0	0	0	A	0	0	1	0	0	0	0	0	m	66	high	0	0	0	0
7796TR7234	1	0	0	0	0	0	0	0	0	0	0	0	0	0	0	0	0	0	0	0	0	0	0	0	0	0	0	0	0	0	0	0	N	0	0	0	1	0	0	0	0	f	10	high	0	0	0	0
7797TR7236	0	0	0	0	0	0	0	0	0	0	0	0	0	0	0	0	0	0	0	0	0	0	0	0	1	0	0	0	0	0	1	0	A	0	0	0	0	1	0	0	1	m	74	high	1	0	0	0
7798TR7237	0	0	0	0	0	0	1	0	0	0	0	0	0	0	0	0	0	0	0	0	1	0	0	0	0	0	1	0	0	0	0	0	N	0	0	0	0	1	0	0	0	f	59	high	1	0	0	0
7799TR7238	0	0	0	0	0	0	0	0	0	0	0	0	0	0	1	0	0	0	0	0	0	0	0	0	0	0	0	0	0	0	0	0	N	0	0	0	0	0	0	0	0	m	54	high	0	0	0	0
7801TR7243	1	0	0	0	0	0	0	0	0	0	0	0	0	0	0	0	0	0	0	0	0	0	0	0	0	0	0	0	0	0	0	0	A	0	0	0	0	0	0	0	0	f	25	high	0	0	0	0
7802TR7244	1	0	0	0	0	0	0	0	0	0	0	0	0	0	0	0	0	0	0	0	0	0	0	0	0	0	0	0	0	0	0	0	A	0	0	0	1	1	0	0	1	f	43	high	3	0	0	0
7808TR7250	1	0	0	0	0	0	0	0	0	0	0	0	0	0	0	0	0	0	0	0	0	0	0	0	0	0	0	0	0	0	0	0	A	0	0	0	0	0	0	0	0	f	43	high	0	0	0	0
7811TR7256	0	0	0	0	1	1	0	0	0	0	0	0	0	0	1	0	0	0	0	0	0	0	0	0	0	0	0	0	0	0	1	0	N	0	0	0	0	1	0	0	0	m	3	medium	0	0	0	0
7813TR7257	0	0	0	0	0	0	0	0	0	0	1	0	1	0	0	1	0	0	0	0	0	0	0	0	0	0	0	0	0	0	0	0	N	0	0	0	0	0	0	0	0	f	47	high	1	0	0	0
7814TR7259	0	0	0	0	0	0	0	0	0	0	0	0	0	0	1	0	0	0	0	0	0	0	0	0	0	0	0	0	0	0	0	0	A	0	0	0	0	0	0	0	0	m	65	medium	0	0	0	0
7815TR7260	1	0	0	0	0	0	0	0	0	0	0	0	0	0	0	0	0	0	0	0	0	0	0	0	0	0	0	0	0	0	0	0	N	0	0	0	1	1	0	0	0	m	4	medium	0	0	0	0
7820TR7268	0	0	0	0	0	0	0	0	0	0	0	0	1	0	0	1	0	0	0	0	0	1	0	0	0	0	0	0	0	0	0	0	N	0	0	0	0	0	0	0	1	f	6	medium	0	0	0	0
7821TR7269	0	0	0	1	0	1	0	0	0	0	0	0	1	1	0	0	0	0	0	0	0	1	0	0	1	0	0	1	0	0	0	0	N	0	0	0	0	1	0	0	0	m	66	high	2	0	0	0
7823TR7271	1	0	0	0	0	0	0	0	0	0	0	0	0	0	0	0	0	0	0	0	0	0	0	0	0	0	0	0	0	0	0	0	A	0	0	0	0	0	0	0	0	m	14	high	0	0	0	0
7826TR7272	0	0	0	1	0	0	0	0	0	0	1	0	0	1	1	0	0	0	0	0	0	0	0	1	0	1	0	0	0	0	1	0	A	0	0	0	0	0	0	0	0	f	35	medium	1	0	0	0
7828TR7275	0	0	0	0	0	0	0	0	0	0	1	0	0	0	0	1	0	0	0	0	0	0	0	0	0	0	0	0	0	0	0	0	N	0	0	0	0	1	0	0	0	f	68	high	0	0	0	0
7833TR7280	1	0	0	0	0	0	0	0	0	0	0	0	0	0	0	0	0	0	0	0	0	0	0	0	0	0	0	0	0	0	0	0	N	0	0	0	1	0	0	0	0	f	69	high	1	0	0	0
7835TR7282	0	0	0	0	0	0	0	1	0	1	0	0	0	0	0	0	0	0	0	0	0	0	0	0	0	0	0	0	0	0	1	0	N	0	0	0	0	0	0	0	0	f	72	low	1	0	0	0
7837TR7283	1	0	0	0	0	0	0	0	0	0	0	0	0	0	0	0	0	0	0	0	0	0	0	0	0	0	0	0	0	0	0	0	A	0	0	0	0	0	0	0	0	f	2	high	0	0	0	0
7838TR7284	1	0	0	0	0	0	0	0	0	0	0	0	0	0	0	0	0	0	0	0	0	0	0	0	0	0	0	0	0	0	0	0	A	1	0	0	0	1	0	1	0	m	78	high	1	0	0	0
7839TR7286	0	0	0	0	0	0	0	1	0	0	0	0	0	0	0	0	0	0	0	0	0	0	0	1	0	0	0	0	0	1	1	0	A	0	0	0	0	0	0	0	0	f	56	high	0	0	0	0
7843TR7287	0	0	0	0	1	0	0	0	0	0	1	0	1	0	0	1	0	0	0	0	0	0	0	0	0	0	0	0	0	0	1	0	N	0	1	0	0	0	0	0	1	m	3	low	0	0	0	0
7848TR7288	0	0	0	0	0	0	0	0	0	0	1	0	0	0	0	0	0	0	1	0	0	0	0	0	0	0	0	0	0	0	0	0	N	0	0	0	0	0	0	0	0	m	47	high	1	0	0	0
7855TR7293	0	0	0	0	0	0	0	1	0	0	0	0	0	0	0	0	0	0	0	0	0	0	0	0	0	0	0	0	0	0	0	0	N	0	0	0	0	0	0	0	0	f	41	high	0	0	0	0
7856TR7294	1	0	0	0	0	0	0	0	0	0	0	0	0	0	0	0	0	0	0	0	0	0	0	0	0	0	0	0	0	0	0	0	N	0	0	0	0	0	0	0	0	f	52	high	1	0	0	0
7867TR7306	1	0	0	0	0	0	0	0	0	0	0	0	0	0	0	0	0	0	0	0	0	0	0	0	0	0	0	0	0	0	0	0	A	0	0	0	0	0	0	0	0	m	53	high	0	0	0	0
7869TR7307	0	0	0	0	0	0	0	0	0	0	0	0	0	0	0	1	0	0	0	0	0	0	0	0	0	0	0	0	0	0	0	0	N	0	0	0	1	0	0	0	0	f	5	high	2	0	0	0
7874TR7314	1	0	0	0	0	0	0	0	0	0	0	0	0	0	0	0	0	0	0	0	0	0	0	0	0	0	0	0	0	0	0	0	N	0	0	0	0	0	0	0	0	f	47	medium	0	0	0	0
7875TR7315	0	0	0	0	0	0	0	0	0	0	0	0	0	0	0	0	0	0	0	0	0	0	0	0	0	0	0	0	0	0	1	0	N	0	0	0	0	1	0	0	0	m	12	medium	1	0	0	0
7876TR7316	0	0	0	0	0	0	0	0	0	0	1	0	1	0	0	0	0	0	0	0	0	0	1	0	0	1	0	0	0	0	0	0	A	0	0	0	1	1	0	0	0	m	66	high	3	0	0	0
7879TR7318	0	0	0	0	0	1	1	1	0	0	1	0	1	0	0	1	0	0	0	0	0	1	0	0	1	0	0	1	0	0	0	0	N	0	0	0	0	0	0	0	1	f	55	medium	0	0	0	0
7881TR7322	1	0	0	0	0	0	0	0	0	0	0	0	0	0	0	0	0	0	0	0	0	0	0	0	0	0	0	0	0	0	0	0	A	0	0	0	0	0	0	0	0	m	22	high	0	0	0	0
7882TR7325	1	0	0	0	0	0	0	0	0	0	0	0	0	0	0	0	0	0	0	0	0	0	0	0	0	0	0	0	0	0	0	0	A	1	0	0	0	0	0	0	1	m	40	high	0	0	0	0
7884TR7328	0	0	0	0	0	0	0	0	0	0	0	0	1	0	1	0	0	0	0	0	0	0	0	0	0	0	0	0	0	0	1	0	N	0	0	0	1	0	0	0	0	f	40	high	2	0	0	0
7886TR7330	0	0	0	1	0	0	0	0	0	0	1	0	1	0	0	0	0	0	0	0	0	0	0	0	0	0	0	0	1	0	0	0	A	1	0	0	0	0	0	0	0	m	55	high	1	0	0	0
7888TR7333	1	0	0	0	0	0	0	0	0	0	0	0	0	0	0	0	0	0	0	0	0	0	0	0	0	0	0	0	0	0	0	0	A	0	0	0	0	1	0	0	1	f	60	high	0	0	0	0
7890TR7337	0	0	0	0	0	0	0	0	0	0	0	0	1	0	0	0	0	0	0	0	0	0	0	0	0	0	0	0	0	0	0	0	A	1	0	0	0	0	0	0	0	m	65	high	1	0	0	0
7891TR7338	0	0	0	0	1	0	0	0	0	0	0	0	0	0	0	0	0	0	0	0	0	0	0	1	0	0	0	0	0	0	0	0	N	0	0	0	0	0	0	0	0	f	40	medium	1	0	0	0
7892TR7340	1	0	0	0	0	0	0	0	0	0	0	0	0	0	0	0	0	0	0	0	0	0	0	0	0	0	0	0	0	0	0	0	N	0	0	0	0	0	0	0	0	m	49	high	1	0	0	0
7893TR7341	1	0	0	0	0	0	0	0	0	0	0	0	0	0	0	0	0	0	0	0	0	0	0	0	0	0	0	0	0	0	0	0	A	0	0	0	0	0	0	0	1	f	11	high	0	0	0	0
7894TR7342	0	0	0	0	0	0	0	0	0	0	0	0	1	0	0	0	0	0	1	1	0	0	1	0	0	0	0	1	0	0	0	0	A	0	0	0	0	0	0	0	0	f	48	medium	1	0	0	0
7896TR7346	1	0	0	0	0	0	0	0	0	0	0	0	0	0	0	0	0	0	0	0	0	0	0	0	0	0	0	0	0	0	0	0	N	0	0	0	1	0	0	0	0	m	20	high	0	0	0	0
7899TR7349	1	0	0	0	0	0	0	0	0	0	0	0	0	0	0	0	0	0	0	0	0	0	0	0	0	0	0	0	0	0	0	0	A	0	0	0	1	1	1	0	1	f	57	medium	1	0	0	0
7901TR7351	0	0	0	0	0	0	0	0	0	0	0	0	0	0	0	1	0	0	0	0	0	0	0	0	0	0	0	0	0	0	0	0	N	0	0	0	0	0	0	0	0	m	2	high	0	0	0	0
7905TR7357	0	0	0	0	1	0	0	0	0	0	0	0	0	0	0	1	0	0	0	0	0	0	0	0	0	0	0	0	0	0	0	0	N	0	0	0	1	0	0	0	0	m	4	high	0	0	0	0
7906TR7358	0	0	0	0	0	0	0	0	0	0	0	0	1	0	0	0	0	0	0	0	0	0	0	0	0	0	0	0	0	0	0	0	N	0	0	0	0	1	1	0	1	m	52	high	1	0	0	0
7907TR7361	1	0	0	0	0	0	0	0	0	0	0	0	0	0	0	0	0	0	0	0	0	0	0	0	0	0	0	0	0	0	0	0	A	0	0	0	0	0	1	0	0	m	20	medium	0	0	0	0
7908TR7363	0	0	0	0	0	0	0	0	0	0	0	0	1	0	0	0	0	0	0	0	0	0	0	1	0	0	0	0	0	0	0	0	N	0	0	0	0	0	0	0	0	f	35	high	0	0	0	0
7910TR7364	1	0	0	0	0	0	0	0	0	0	0	0	0	0	0	0	0	0	0	0	0	0	0	0	0	0	0	0	0	0	0	0	A	0	0	0	1	0	0	0	0	f	52	high	1	1	0	0
7911TR7371	0	0	0	0	0	0	0	0	0	0	0	1	0	0	0	0	0	0	0	1	0	1	0	0	0	0	0	1	0	0	0	0	N	0	0	0	1	0	1	0	0	m	64	high	0	1	1	0
7914TR7366	0	0	0	0	1	0	0	0	0	0	0	0	0	0	0	0	0	0	0	0	0	0	1	1	0	0	0	0	1	0	0	0	N	0	0	0	1	0	0	0	0	f	47	high	1	0	0	0
7915TR7367	0	0	0	0	0	0	0	0	0	0	0	0	0	1	0	0	0	0	0	1	0	0	0	1	0	0	0	0	0	0	0	0	N	0	0	0	0	0	0	0	0	f	48	medium	0	0	0	0
7917TR7369	1	0	0	0	0	0	0	0	0	0	0	0	0	0	0	0	0	0	0	0	0	0	0	0	0	0	0	0	0	0	0	0	N	0	0	0	0	1	1	0	0	f	6	high	0	0	0	0
7920TR7372	1	0	0	0	0	0	0	0	0	0	0	0	0	0	0	0	0	0	0	0	0	0	0	0	0	0	0	0	0	0	0	0	A	0	0	0	0	0	0	0	0	m	51	high	0	0	0	0
7921TR7373	0	0	0	0	0	0	0	0	0	0	0	1	0	0	0	0	0	0	0	1	0	1	0	0	0	0	0	1	0	0	0	0	N	0	0	0	1	0	0	0	0	f	53	high	0	0	0	0
7927TR7379	0	0	0	0	1	0	1	0	0	0	1	0	1	1	1	1	0	0	1	0	0	0	0	0	0	0	0	0	0	0	0	0	N	0	0	0	0	1	0	0	0	f	3	high	1	0	0	0
7930TR7380	0	0	0	0	0	0	0	0	0	0	1	0	0	0	1	1	0	0	0	0	0	0	0	0	0	0	0	0	0	0	0	0	N	0	0	0	0	1	0	0	0	m	3	high	1	0	0	0
7931TR7381	0	0	0	0	0	1	0	0	0	0	0	0	0	0	0	0	0	0	0	0	0	0	0	0	0	0	0	0	0	0	0	0	N	0	0	0	0	0	0	0	0	m	51	high	1	0	0	0
7934TR7383	1	0	0	0	0	0	0	0	0	0	0	0	0	0	0	0	0	0	0	0	0	0	0	0	0	0	0	0	0	0	0	0	A	0	0	0	0	0	0	0	0	f	57	low	1	0	0	0
7936TR7387	0	0	0	0	0	0	0	0	0	0	0	0	0	0	0	0	0	0	0	0	0	0	0	0	0	0	0	0	0	1	1	0	N	0	0	0	0	1	0	0	0	f	46	medium	1	0	0	0
7937TR7388	1	0	0	0	0	0	0	0	0	0	0	0	0	0	0	0	0	0	0	0	0	0	0	0	0	0	0	0	0	0	0	0	A	0	0	0	0	0	0	0	1	m	52	low	0	0	0	0
7939TR7389	1	0	0	0	0	0	0	0	0	0	0	0	0	0	0	0	0	0	0	0	0	0	0	0	0	0	0	0	0	0	0	0	N	0	0	0	1	1	0	0	0	m	5	high	0	0	0	0
7943TR7390	1	0	0	0	0	0	0	0	0	0	0	0	0	0	0	0	0	0	0	0	0	0	0	0	0	0	0	0	0	0	0	0	A	0	0	0	0	1	0	0	0	m	53	medium	0	0	0	0
7948TR7393	1	0	0	0	0	0	0	0	0	0	0	0	0	0	0	0	0	0	0	0	0	0	0	0	0	0	0	0	0	0	0	0	A	0	0	0	1	0	0	0	0	f	66	high	1	0	0	0
7951TR7397	0	0	0	0	0	0	0	0	0	0	1	0	1	0	0	1	0	0	0	1	0	0	0	1	0	0	0	0	0	0	0	0	N	0	0	0	0	0	0	0	0	f	43	high	0	0	0	0
7955TR7401	1	0	0	0	0	0	0	0	0	0	0	0	0	0	0	0	0	0	0	0	0	0	0	0	0	0	0	0	0	0	0	0	A	1	0	0	0	0	0	0	0	f	62	medium	5	0	0	0
7957TR7403	0	0	0	0	0	0	0	0	0	0	0	0	0	0	0	0	0	0	0	0	0	0	1	1	0	1	0	0	1	0	0	0	A	1	0	0	0	1	1	0	0	f	57	medium	2	0	0	0
7958TR7404	0	0	0	0	0	0	0	0	0	0	0	0	0	1	0	0	0	0	0	0	0	0	0	0	1	0	0	1	0	0	1	0	N	0	0	0	0	0	0	0	0	m	44	medium	1	0	0	0
7960TR7408	0	0	0	0	0	0	0	0	0	0	0	0	1	0	0	0	0	0	0	0	0	0	1	0	0	0	0	0	1	0	1	0	N	0	0	0	1	1	0	0	0	m	51	high	2	0	0	0
7962TR7410	0	0	0	1	1	0	0	0	0	0	0	0	1	0	0	0	0	0	0	0	0	0	0	0	0	0	0	0	0	0	1	0	N	0	0	0	0	0	0	0	1	f	3	high	0	1	1	0
7967TR7416	0	0	0	0	0	0	0	0	0	0	0	0	0	1	0	0	0	0	0	0	0	0	0	0	0	0	0	0	0	0	0	0	N	0	0	0	0	0	0	0	0	f	10	high	0	0	0	0
7969TR7418	0	0	0	0	0	0	0	0	0	0	1	0	0	0	0	1	0	0	0	0	0	0	0	0	0	0	0	0	0	0	0	0	N	0	0	0	0	1	0	0	1	f	2	high	0	0	0	0
7970TR7422	0	0	0	0	0	1	1	0	0	0	0	1	0	0	0	0	1	0	0	0	0	0	0	0	0	0	0	0	0	0	1	0	A	0	0	0	0	1	1	0	1	m	62	high	0	0	0	0
7971TR7423	0	0	0	0	0	1	0	0	0	0	0	0	1	0	0	0	0	0	0	1	0	0	0	0	0	0	0	0	0	0	1	0	N	0	0	0	0	1	0	1	1	f	53	high	0	0	0	0
7979TR7431	1	0	0	0	0	0	0	0	0	0	0	0	0	0	0	0	0	0	0	0	0	0	0	0	0	0	0	0	0	0	0	0	A	0	0	0	0	0	0	0	0	f	60	medium	1	0	0	0
7980TR7433	0	0	0	1	0	1	0	1	0	0	0	0	1	0	0	0	0	0	0	1	0	0	1	1	0	1	1	1	0	1	0	0	A	0	0	0	0	0	0	0	0	f	50	medium	0	0	0	0
7987TR7440	0	0	0	0	0	0	0	0	0	1	0	0	0	0	0	0	0	0	0	0	0	0	0	0	0	0	0	0	0	0	0	0	N	0	0	0	0	0	0	0	0	f	68	medium	1	0	0	0
7990TR7444	0	0	0	0	0	0	1	0	0	0	0	0	0	0	0	0	0	0	0	0	0	0	0	1	0	0	0	0	0	0	0	0	N	0	0	0	0	0	0	0	0	m	64	high	0	0	0	0
7992TR7445	1	0	0	0	0	0	0	0	0	0	0	0	0	0	0	0	0	0	0	0	0	0	0	0	0	0	0	0	0	0	0	0	A	0	0	0	0	0	0	0	0	m	6	high	1	0	0	0
7995TR7449	1	0	0	0	0	0	0	0	0	0	0	0	0	0	0	0	0	0	0	0	0	0	0	0	0	0	0	0	0	0	0	0	A	0	0	0	0	0	0	0	1	m	67	high	0	0	0	0
7997TR7451	0	0	0	0	0	0	0	0	0	0	0	0	1	0	0	0	0	0	0	0	1	0	0	1	0	0	0	1	0	0	0	0	A	0	0	0	0	0	0	0	0	m	45	high	0	0	0	0
8000TR7453	0	0	0	0	1	0	0	0	0	0	0	0	0	0	0	0	0	0	0	0	0	0	0	0	0	0	0	0	0	0	0	0	N	0	0	0	0	0	0	0	0	m	6	high	0	0	0	0
8017TR7468	0	0	0	0	0	0	0	0	0	0	0	0	0	0	0	0	0	0	0	0	0	0	0	0	0	0	0	0	1	0	0	0	A	0	0	0	0	0	0	0	0	m	60	high	0	0	0	0
8018TR7470	1	0	0	0	0	0	0	0	0	0	0	0	0	0	0	0	0	0	0	0	0	0	0	0	0	0	0	0	0	0	0	0	N	1	0	0	0	0	0	0	0	m	67	medium	0	0	0	0
8019TR7471	0	0	0	0	0	0	0	0	0	1	0	0	0	0	0	0	0	0	0	0	0	0	1	1	0	0	0	0	0	1	0	1	A	0	0	0	0	0	0	0	0	f	71	medium	1	0	0	0
8022TR7476	0	0	0	0	0	0	0	0	0	0	0	0	0	0	0	0	0	0	1	0	0	0	0	0	0	0	0	0	0	0	0	0	N	0	0	0	1	0	0	0	0	m	7	medium	0	0	0	0
8023TR7477	0	0	0	1	0	0	0	0	0	0	0	0	0	0	0	0	0	0	0	0	1	0	0	0	0	0	0	0	0	0	0	0	A	0	0	0	0	0	0	1	0	f	27	high	3	0	0	0
8029TR7485	1	0	0	0	0	0	0	0	0	0	0	0	0	0	0	0	0	0	0	0	0	0	0	0	0	0	0	0	0	0	0	0	N	0	0	0	0	0	0	1	0	m	43	high	1	0	0	0
8032TR7487	0	0	0	0	0	0	0	0	0	0	0	0	0	0	0	0	0	0	0	0	0	0	0	0	0	0	0	0	1	0	0	0	N	0	0	0	0	0	0	0	0	m	70	medium	2	0	0	0
8034TR7490	0	0	0	0	0	0	0	0	0	0	1	0	0	0	0	1	0	0	0	0	0	0	0	0	0	0	0	0	0	0	0	0	A	0	0	0	1	1	0	0	1	m	3	low	0	0	0	0
8037TR7493	0	0	0	1	1	0	1	0	0	0	1	0	1	0	1	0	1	0	1	1	0	0	1	0	0	0	0	1	1	1	1	0	A	0	0	0	1	0	0	0	0	m	44	high	1	0	0	0
8038TR7494	0	0	0	0	1	0	0	0	0	0	0	0	0	0	0	0	0	0	0	0	0	0	0	0	0	0	0	0	1	0	0	0	N	0	0	0	0	1	0	0	0	f	9	low	0	0	0	0
8039TR7495	1	0	0	0	0	0	0	0	0	0	0	0	0	0	0	0	0	0	0	0	0	0	0	0	0	0	0	0	0	0	0	0	N	0	0	0	0	1	0	0	0	f	57	high	0	0	0	0
8041TR7501	0	0	0	0	0	0	0	0	0	0	0	0	0	0	0	0	0	0	0	0	0	0	0	0	0	0	0	0	0	0	1	0	N	0	0	0	0	0	0	0	0	f	8	high	0	0	0	0
8044TR7505	1	0	0	0	0	0	0	0	0	0	0	0	0	0	0	0	0	0	0	0	0	0	0	0	0	0	0	0	0	0	0	0	N	0	0	0	1	1	0	0	1	f	9	high	0	0	0	1	1
8046TR7508	0	0	0	1	0	0	0	0	0	0	0	0	1	0	0	0	0	0	0	0	0	1	0	0	0	0	0	0	0	0	1	0	N	0	0	0	0	0	0	0	1	m	57	medium	0	0	0	0
8050TR7511	1	0	0	0	0	0	0	0	0	0	0	0	0	0	0	0	0	0	0	0	0	0	0	0	0	0	0	0	0	0	0	0	N	1	0	0	1	0	0	0	0	m	68	medium	2	0	0	0
8056TR7516	0	0	0	0	1	0	0	0	0	0	0	0	0	0	0	0	0	0	0	0	0	0	0	0	0	0	0	0	0	0	0	0	A	0	0	0	0	0	0	0	0	f	6	high	0	0	0	0
8059TR7518	1	0	0	0	0	0	0	0	0	0	0	0	0	0	0	0	0	0	0	0	0	0	0	0	0	0	0	0	0	0	0	0	N	0	0	0	0	0	0	0	0	m	60	high	1	0	0	0
8063TR7521	0	0	0	0	0	0	0	0	0	0	0	1	0	0	0	0	0	0	0	0	0	0	0	0	0	0	0	0	0	0	0	0	A	0	0	0	1	0	0	0	0	m	71	high	0	0	0	0
8066TR7523	0	0	0	0	0	1	0	0	0	0	0	0	1	0	0	0	0	0	0	0	0	0	0	0	0	0	0	0	0	0	0	0	A	0	0	0	1	0	1	1	1	m	7	high	0	0	0	0
8067TR7524	0	0	0	0	0	1	0	1	0	0	1	0	0	0	0	0	0	0	0	0	0	0	0	0	0	0	0	0	0	0	1	0	N	0	0	0	0	0	0	0	0	f	13	high	0	0	0	0
8069TR7525	0	0	0	1	1	0	0	0	0	0	0	0	0	1	0	0	0	0	1	0	0	0	0	0	0	0	0	1	0	0	0	0	N	0	0	0	1	0	0	1	0	f	10	high	0	0	0	0
8071TR7528	0	0	0	0	0	0	0	0	0	0	0	0	0	0	0	0	0	0	0	0	0	0	0	0	1	0	0	0	0	0	0	0	A	0	0	0	0	1	0	0	1	m	46	medium	1	0	0	0
8074TR7531	1	0	0	0	0	0	0	0	0	0	0	0	0	0	0	0	0	0	0	0	0	0	0	0	0	0	0	0	0	0	0	0	A	0	1	0	0	0	0	0	0	f	75	low	2	0	0	0
8076TR7532	0	0	0	0	0	0	0	0	0	0	0	0	0	0	1	0	0	0	0	0	0	0	0	0	0	0	0	0	0	0	0	0	A	0	0	0	0	1	0	0	1	f	32	high	0	0	0	0
8078TR7534	0	0	0	0	0	0	0	0	0	0	1	0	0	0	1	0	0	0	0	0	0	0	0	0	0	1	0	0	1	0	1	0	N	0	0	0	1	0	0	0	0	f	11	high	0	0	0	0
8088TR7544	0	0	0	1	0	1	0	1	0	0	1	0	1	1	1	1	1	0	1	0	0	1	1	0	0	1	1	1	1	1	1	1	N	0	0	0	0	0	0	0	0	m	52	high	0	0	0	0
8089TR7545	0	0	0	0	0	0	0	0	0	0	0	0	0	0	0	1	0	0	1	0	0	0	0	0	0	0	0	0	0	0	0	0	N	0	0	0	1	0	0	0	0	f	1	medium	0	0	0	0
8091TR7547	0	0	0	1	0	0	0	0	0	0	0	0	0	1	1	0	0	0	0	0	0	0	0	1	0	0	1	1	0	0	0	0	A	0	0	0	0	1	1	0	0	m	57	medium	2	0	0	0
8092TR7551	0	0	0	0	0	0	0	0	0	0	0	0	0	0	0	0	0	0	0	1	0	0	1	0	0	0	0	0	0	1	0	1	N	0	0	0	1	0	0	0	1	f	65	high	4	0	0	0
8093TR7552	0	0	0	0	0	0	0	0	0	0	0	0	0	0	0	0	0	0	0	0	0	0	0	0	0	0	0	0	0	0	0	0	A	0	0	0	0	0	0	0	1	f	65	medium	3	0	0	0
8094TR7555	1	0	0	0	0	0	0	0	0	0	0	0	0	0	0	0	0	0	0	0	0	0	0	0	0	0	0	0	0	0	0	0	A	1	0	0	0	0	0	0	0	f	45	high	1	0	0	0
8286TR7761	0	0	0	0	1	0	1	0	0	0	0	0	0	0	0	0	0	0	1	0	0	0	0	0	0	0	0	0	0	0	0	0	N	0	0	0	0	1	0	0	0	f	2	medium	0	0	0	0
8410TR1690a	0	0	0	0	0	0	0	0	0	0	0	0	0	0	0	0	0	0	0	0	0	0	1	0	0	0	0	0	0	0	0	0	N	0	0	0	1	0	0	0	0	f	62	high	3	0	0	1
8492TR0400a	0	0	0	0	0	0	0	0	0	0	0	0	0	0	0	0	0	0	1	0	0	0	1	0	0	0	0	0	0	0	0	0	N	0	0	0	1	0	0	0	0	m	35	high	1	0	0	0
8509TR7909	0	0	0	0	0	0	0	0	0	0	0	0	0	0	0	0	0	0	0	0	0	0	0	0	0	0	0	0	0	0	1	0	N	0	0	0	0	1	0	0	1	f	42	high	1	0	0	0
8525TR7929	1	0	0	0	0	0	0	0	0	0	0	0	0	0	0	0	0	0	0	0	0	0	0	0	0	0	0	0	0	0	0	0	N	0	0	0	0	0	0	0	1	m	67	medium	0	0	0	0
8550TR7963	1	0	0	0	0	0	0	0	0	0	0	0	0	0	0	0	0	0	0	0	0	0	0	0	0	0	0	0	0	0	0	0	N	0	0	0	0	0	0	0	0	f	53	medium	0	0	0	0
8562TR7972	0	0	0	0	0	0	0	0	0	0	0	0	0	1	1	0	0	0	0	0	1	0	0	0	0	0	0	0	0	1	0	0	A	0	0	0	0	0	0	0	1	f	63	high	2	0	0	0
8567TR7977	1	0	0	0	0	0	0	0	0	0	0	0	0	0	0	0	0	0	0	0	0	0	0	0	0	0	0	0	0	0	0	0	N	0	0	0	0	0	0	0	0	f	64	medium	1	0	0	0
8571TR7980	0	0	0	0	0	0	0	0	0	0	0	0	0	1	1	0	0	0	0	0	1	0	0	0	1	0	0	0	0	1	1	0	N	0	0	0	0	0	0	0	0	m	75	high	2	0	0	1
8573TR7982	1	0	0	0	0	0	0	0	0	0	0	0	0	0	0	0	0	0	0	0	0	0	0	0	0	0	0	0	0	0	0	0	N	0	0	0	0	0	0	0	0	f	65	low	0	0	0	0
8577TR7983	0	0	0	1	0	1	0	0	0	0	0	0	0	0	0	0	1	0	0	0	1	0	0	0	0	1	0	0	0	0	1	0	N	0	0	0	0	0	0	0	0	f	74	high	5	0	0	0
8580TR7986	1	0	0	0	0	0	0	0	0	0	0	0	0	0	0	0	0	0	0	0	0	0	0	0	0	0	0	0	0	0	0	0	N	0	0	0	1	0	0	0	0	m	82	high	0	0	0	1
8582TR7988	1	0	0	0	0	0	0	0	0	0	0	0	0	0	0	0	0	0	0	0	0	0	0	0	0	0	0	0	0	0	0	0	N	0	0	0	0	0	1	0	0	m	75	high	2	0	0	0
8597TR7998	1	0	0	0	0	0	0	0	0	0	0	0	0	0	0	0	0	0	0	0	0	0	0	0	0	0	0	0	0	0	0	0	N	0	0	0	0	1	0	0	0	m	77	high	1	0	0	0
8598TR7999	1	0	0	0	0	0	0	0	0	0	0	0	0	0	0	0	0	0	0	0	0	0	0	0	0	0	0	0	0	0	0	0	N	0	0	0	0	0	0	0	0	m	35	high	0	0	0	1
8599TR8000	1	0	0	0	0	0	0	0	0	0	0	0	0	0	0	0	0	0	0	0	0	0	0	0	0	0	0	0	0	0	0	0	N	0	0	0	0	1	0	0	0	m	64	high	0	0	0	0
8600TR5604a	1	0	0	0	0	0	0	0	0	0	0	0	0	0	0	0	0	0	0	0	0	0	0	0	0	0	0	0	0	0	0	0	N	0	0	0	0	0	0	0	0	m	66	high	0	0	0	1
8605TR8004	1	0	0	0	0	0	0	0	0	0	0	0	0	0	0	0	0	0	0	0	0	0	0	0	0	0	0	0	0	0	0	0	N	0	0	0	0	1	0	0	0	f	40	high	0	0	0	0
8616TR8015	0	1	0	0	0	0	0	0	0	0	0	0	0	0	0	0	0	0	0	0	0	0	0	0	0	0	0	0	0	0	0	0	N	0	0	0	0	0	0	0	0	m	64	medium	2	0	0	0
8637TR8046	1	0	0	0	0	0	0	0	0	0	0	0	0	0	0	0	0	0	0	0	0	0	0	0	0	0	0	0	0	0	0	0	N	0	0	0	1	0	1	0	0	f	31	high	0	0	0	0
8644TR8054	0	0	0	0	0	0	0	0	0	0	0	0	0	0	0	0	0	0	0	0	0	0	0	0	0	0	0	0	0	0	0	0	A	0	0	0	0	0	1	0	0	m	48	high	1	0	0	0
8651TR8060	0	0	0	0	0	0	0	0	0	0	0	0	0	0	0	0	0	0	0	0	0	0	1	0	0	0	0	0	0	0	0	0	N	0	0	0	1	0	0	0	0	f	61	medium	0	0	0	0
8661TR8069	0	0	0	0	0	0	0	0	0	0	0	0	1	0	0	0	0	0	0	0	0	0	0	1	0	0	0	0	0	0	0	0	N	0	0	0	0	0	0	0	0	f	43	medium	1	0	0	1
8664TR8073	1	0	0	0	0	0	0	0	0	0	0	0	0	0	0	0	0	0	0	0	0	0	0	0	0	0	0	0	0	0	0	0	N	0	0	0	1	0	0	0	0	m	59	high	0	0	0	0
8672TR8080	0	0	0	0	0	0	0	0	0	0	1	0	0	0	0	0	0	0	0	0	0	0	0	0	0	0	0	0	0	0	0	0	A	0	0	0	1	0	0	0	0	m	67	high	2	0	0	1
8680TR8091	0	0	0	0	0	0	1	0	0	0	0	0	0	0	1	0	0	0	0	0	0	0	0	0	0	0	0	0	0	0	0	0	N	0	0	0	0	0	0	0	0	m	60	high	2	0	0	0
8682TR8093	1	0	0	0	0	0	0	0	0	0	0	0	0	0	0	0	0	0	0	0	0	0	0	0	0	0	0	0	0	0	0	0	N	0	0	0	0	0	0	0	0	f	62	high	2	0	0	1
8684TR8097	0	0	0	0	0	1	0	0	0	0	0	0	0	1	1	0	1	0	0	1	1	1	0	0	0	1	1	1	0	1	1	1	N	0	0	0	0	0	0	0	0	f	65	medium	5	0	0	0
8687TR8099	0	0	0	1	0	0	0	0	0	1	0	0	0	0	0	0	1	0	0	1	0	0	1	0	1	0	0	1	0	1	1	0	N	0	0	0	0	0	0	0	0	f	53	medium	1	0	0	0
8692TR8106	0	0	0	0	1	0	0	1	0	1	1	1	0	0	0	1	0	0	0	0	0	0	1	1	0	1	0	0	1	0	1	0	A	0	0	0	0	0	0	0	1	m	68	medium	1	1	2	0
8694TR8109	1	0	0	0	0	0	0	0	0	0	0	0	0	0	0	0	0	0	0	0	0	0	0	0	0	0	0	0	0	0	0	0	N	0	0	0	0	0	0	0	0	f	60	high	0	0	0	0
8705TR8121	1	0	0	0	0	0	0	0	0	0	0	0	0	0	0	0	0	0	0	0	0	0	0	0	0	0	0	0	0	0	0	0	N	0	0	0	0	0	0	0	0	f	39	high	0	0	0	1
8710TR8125	0	0	0	0	0	0	0	0	0	0	0	0	0	0	0	0	0	0	0	0	0	0	0	0	0	0	0	0	0	0	0	0	N	0	0	0	1	0	0	0	0	m	72	medium	0	0	0	1
8721TR8138	1	0	0	0	0	0	0	0	0	0	0	0	0	0	0	0	0	0	0	0	0	0	0	0	0	0	0	0	0	0	0	0	N	0	0	0	0	0	0	0	0	m	12	high	0	0	0	1
8732TR8147	0	0	0	0	0	0	0	0	0	0	0	0	0	0	0	0	0	0	0	1	0	0	0	0	0	0	0	0	0	0	0	0	N	0	0	0	0	0	0	0	0	m	60	high	1	0	0	1
8734TR8149	1	0	0	0	0	0	0	0	0	0	0	0	0	0	0	0	0	0	0	0	0	0	0	0	0	0	0	0	0	0	0	0	N	0	0	0	0	0	1	0	1	m	52	high	0	0	0	0
8742TR8157	0	0	0	0	0	0	0	0	0	0	0	0	0	0	0	0	0	0	0	0	0	0	0	0	0	0	0	0	0	0	0	0	N	0	0	0	0	0	0	0	0	m	9	medium	1	0	0	0
8746TR8161	0	0	0	0	0	0	0	0	0	0	0	0	0	0	1	0	0	0	0	0	0	0	0	0	0	0	0	0	0	0	0	0	N	0	0	0	1	0	0	0	1	m	40	medium	0	0	0	0
8759TR8182	0	0	0	0	0	0	0	0	0	1	0	0	0	1	1	0	0	0	0	1	0	0	0	0	0	0	1	0	1	0	0	0	A	0	0	0	0	0	0	0	0	m	71	high	2	0	0	0
8768TR8191	1	0	0	0	0	0	0	0	0	0	0	0	0	0	0	0	0	0	0	0	0	0	0	0	0	0	0	0	0	0	0	0	A	0	0	0	0	0	0	0	0	m	46	medium	0	0	0	0
8775TR8199	1	0	0	0	0	0	0	0	0	0	0	0	0	0	0	0	0	0	0	0	0	0	0	0	0	0	0	0	0	0	0	0	A	0	0	0	0	1	0	0	0	m	14	high	0	0	0	0
8777TR8205	1	0	0	0	0	0	0	0	0	0	0	0	0	0	0	0	0	0	0	0	0	0	0	0	0	0	0	0	0	0	0	0	N	0	0	0	0	0	0	0	0	m	37	medium	0	0	0	1
8783TR8214	1	0	0	0	0	0	0	0	0	0	0	0	0	0	0	0	0	0	0	0	0	0	0	0	0	0	0	0	0	0	0	0	N	0	0	0	0	1	0	0	0	f	67	high	3	0	0	0
8785TR8219	0	0	0	0	0	0	0	0	0	0	0	0	0	0	0	0	0	0	0	0	0	0	0	0	0	0	0	0	0	0	0	0	N	0	0	0	0	0	0	0	0	m	68	high	2	0	0	0
8791TR8224	0	0	0	0	0	0	0	0	0	0	1	1	0	1	1	0	0	0	0	0	0	0	0	0	0	0	0	0	0	0	0	0	A	0	0	0	0	1	0	0	0	m	68	high	2	0	0	0
8800TR8233	0	0	0	0	0	0	0	0	0	0	0	0	0	0	0	0	0	0	0	0	0	0	0	0	0	0	0	0	0	0	1	0	N	0	0	0	0	0	0	0	0	f	61	medium	0	0	0	1
8801TR8234	0	0	0	0	0	0	0	0	0	0	0	0	1	0	0	0	0	0	0	0	0	0	0	0	0	0	0	0	0	0	0	0	N	0	0	0	0	1	0	0	0	f	58	medium	0	0	0	0
8806TR8238	1	0	0	0	0	0	0	0	0	0	0	0	0	0	0	0	0	0	0	0	0	0	0	0	0	0	0	0	0	0	0	0	A	0	0	0	0	0	0	0	0	m	69	high	0	0	0	1
8808TR8248	1	0	0	0	0	0	0	0	0	0	0	0	0	0	0	0	0	0	0	0	0	0	0	0	0	0	0	0	0	0	0	0	N	0	0	0	0	0	0	0	1	m	41	medium	1	1	1	1
8816TR8250	1	0	0	0	0	0	0	0	0	0	0	0	0	0	0	0	0	0	0	0	0	0	0	0	0	0	0	0	0	0	0	0	N	0	0	0	0	0	0	0	0	m	68	high	1	0	0	1
8825TR8259	1	0	0	0	0	0	0	0	0	0	0	0	0	0	0	0	0	0	0	0	0	0	0	0	0	0	0	0	0	0	0	0	N	0	0	0	0	0	0	0	1	m	9	low	0	0	0	0
8827TR8260	0	0	0	0	0	0	0	1	0	0	0	0	0	0	0	0	0	0	0	0	0	0	0	1	0	0	0	0	0	0	0	0	N	0	0	0	0	0	0	0	0	m	17	medium	2	0	0	0
8828TR8261	0	0	0	0	0	0	0	0	0	0	0	0	0	0	0	0	0	0	0	0	0	0	0	0	0	0	0	0	0	0	0	0	A	0	0	0	0	0	0	0	0	f	43	high	1	1	2	1
8831TR8265	1	0	0	0	0	0	0	0	0	0	0	0	0	0	0	0	0	0	0	0	0	0	0	0	0	0	0	0	0	0	0	0	N	0	0	0	0	0	0	0	0	f	13	high	0	0	0	0
8853TR8292	0	0	0	0	0	0	0	0	0	0	0	0	1	0	0	0	0	0	0	0	0	0	0	0	0	0	0	0	0	0	1	0	A	0	0	0	0	0	0	0	0	f	11	high	0	0	0	0
8855TR3051a	0	0	0	0	0	0	1	0	0	0	0	0	0	0	0	0	0	0	0	0	0	0	1	1	0	0	0	0	0	0	0	0	N	0	0	0	1	0	0	0	0	f	69	low	4	0	0	0
8856TR8297	0	0	0	0	0	0	0	0	0	0	0	0	1	0	0	0	0	0	0	0	0	0	0	0	0	0	0	0	0	0	0	0	N	0	0	0	0	0	0	0	0	m	69	low	3	0	0	0
8861TR8301	1	0	0	0	0	0	0	0	0	0	0	0	0	0	0	0	0	0	0	0	0	0	0	0	0	0	0	0	0	0	0	0	N	0	0	0	0	1	0	0	0	f	64	medium	1	0	0	1
8862TR8305	1	0	0	0	0	0	0	0	0	0	0	0	0	0	0	0	0	0	0	0	0	0	0	0	0	0	0	0	0	0	0	0	A	0	0	0	0	1	0	0	0	f	28	medium	0	0	0	1
8864TR8425a	1	0	0	0	0	0	0	0	0	0	0	0	0	0	0	0	0	0	0	0	0	0	0	0	0	0	0	0	0	0	0	0	N	0	0	0	1	0	0	0	1	f	52	high	0	0	0	0
8873TR8320	0	0	0	0	0	0	0	0	0	0	0	0	0	0	0	0	0	0	0	0	0	0	0	0	0	0	0	0	0	0	1	0	N	0	0	0	0	0	0	0	0	m	34	high	0	0	0	1
8877TR8327	1	0	0	0	0	0	0	0	0	0	0	0	0	0	0	0	0	0	0	0	0	0	0	0	0	0	0	0	0	0	0	0	N	0	0	0	0	0	0	0	0	m	31	high	0	0	0	0
8889TR8341	1	0	0	0	0	0	0	0	0	0	0	0	0	0	0	0	0	0	0	0	0	0	0	0	0	0	0	0	0	0	0	0	A	0	0	0	0	0	0	0	0	m	48	high	1	0	0	0
8905TR8366	0	0	0	0	0	0	0	1	0	0	1	0	0	0	0	0	1	0	0	0	1	1	1	0	0	1	0	0	0	1	1	0	N	0	0	0	0	0	0	0	0	m	46	high	1	0	0	0
8912TR8374	0	0	0	1	0	0	1	0	0	0	1	0	0	0	0	0	0	0	0	0	1	0	1	1	0	1	0	1	1	0	1	1	N	0	0	0	0	1	0	0	0	f	48	medium	1	0	0	1
8927TR8392	1	0	0	0	0	0	0	0	0	0	0	0	0	0	0	0	0	0	0	0	0	0	0	0	0	0	0	0	0	0	0	0	N	0	0	0	1	0	0	0	0	m	33	high	0	0	0	1
8930TR8396	0	0	0	0	0	0	0	0	0	0	1	0	0	0	0	0	0	0	0	0	0	0	0	0	0	0	0	0	0	1	0	0	A	0	0	0	0	1	0	0	0	m	47	high	1	0	0	0
8931TR8400	0	1	0	0	0	0	0	0	0	0	0	0	0	0	0	0	0	0	0	0	0	0	0	0	0	0	0	0	1	0	0	0	N	0	0	0	1	0	0	0	0	m	74	high	0	0	0	1
8943TR8409	0	0	0	0	0	0	1	0	0	0	0	0	0	0	0	0	0	0	1	0	0	0	0	0	0	1	0	0	0	1	0	0	N	0	1	0	0	0	0	0	0	m	63	high	3	1	0	0
8949TR5992b	1	0	0	0	0	0	0	0	0	0	0	0	0	0	0	0	0	0	0	0	0	0	0	0	0	0	0	0	0	0	0	0	A	0	0	0	0	1	0	0	0	f	60	high	5	0	0	1
8960TR8435	0	0	0	0	0	0	1	0	0	0	0	0	0	1	0	0	1	0	1	0	0	0	1	0	0	0	1	0	1	1	0	0	A	0	0	0	0	1	0	0	0	f	48	high	1	1	0	0
8964TR8441	1	0	0	0	0	0	0	0	0	0	0	0	0	0	0	0	0	0	0	0	0	0	0	0	0	0	0	0	0	0	0	0	N	0	0	0	0	0	0	0	0	f	54	high	2	0	0	0
8978TR8453	1	0	0	0	0	0	0	0	0	0	0	0	0	0	0	0	0	0	0	0	0	0	0	0	0	0	0	0	0	0	0	0	N	0	0	0	0	0	0	0	0	m	65	medium	1	0	0	1
8981TR8461	0	0	0	0	0	1	0	0	0	0	1	0	0	0	0	0	0	0	0	0	0	0	0	0	0	0	0	0	1	0	1	0	A	0	0	0	1	1	1	1	1	m	45	high	0	0	0	0
8984TR8473	0	0	0	0	1	1	0	1	0	0	0	0	1	0	0	0	0	0	1	0	0	0	0	0	1	0	0	1	0	0	1	0	N	0	0	0	1	0	0	0	0	f	17	medium	0	0	0	1
8986TR8471	0	0	0	0	0	0	0	0	0	0	0	0	1	0	0	0	0	0	0	0	0	0	0	0	0	0	0	0	0	0	0	0	N	0	0	0	0	0	0	0	1	f	9	high	0	0	0	0
8989TR8475	0	0	0	0	0	0	0	0	0	0	0	0	0	0	0	0	0	0	0	0	1	0	0	0	0	0	0	0	0	0	0	0	N	0	0	0	0	0	0	0	0	f	54	high	0	0	0	1
8994TR8482	0	0	0	1	0	0	0	0	0	0	0	0	0	0	0	0	0	0	0	0	0	0	1	0	0	1	0	1	1	0	1	0	A	0	0	0	1	0	0	0	0	m	71	medium	3	1	1	1
9003TR8490	0	0	0	0	0	0	0	0	0	0	0	0	0	0	0	0	0	0	0	0	0	0	0	0	0	0	0	0	1	0	0	0	N	0	0	0	1	0	1	0	1	m	51	high	0	0	0	0
9008TR8531	1	0	0	0	0	0	0	0	0	0	0	0	0	0	0	0	0	0	0	0	0	0	0	0	0	0	0	0	0	0	0	0	N	0	0	0	0	0	0	0	1	f	58	high	1	0	0	1
9010TR8496	1	0	0	0	0	0	0	0	0	0	0	0	0	0	0	0	0	0	0	0	0	0	0	0	0	0	0	0	0	0	0	0	N	0	0	0	1	0	0	0	1	m	10	high	0	0	0	0
9016TR8507	1	0	0	0	0	0	0	0	0	0	0	0	0	0	0	0	0	0	0	0	0	0	0	0	0	0	0	0	0	0	0	0	N	0	0	0	0	0	0	0	1	m	50	high	0	0	0	1
9021TR8514	0	0	0	0	0	0	1	0	0	0	0	0	0	0	0	0	0	0	0	0	0	0	0	1	0	0	0	0	0	0	0	0	N	0	0	0	0	1	0	0	0	m	67	high	1	0	0	1
9023TR8517	1	0	0	0	0	0	0	0	0	0	0	0	0	0	0	0	0	0	0	0	0	0	0	0	0	0	0	0	0	0	0	0	N	0	0	0	0	1	0	0	0	f	54	medium	2	0	0	1
9029TR8524	0	0	0	0	0	0	0	0	0	0	0	0	0	0	0	0	0	0	0	1	0	0	0	0	0	0	0	0	0	0	0	0	N	0	0	0	1	0	0	0	0	f	66	medium	2	0	0	0
9034TR8532	1	0	0	0	0	0	0	0	0	0	0	0	0	0	0	0	0	0	0	0	0	0	0	0	0	0	0	0	0	0	0	0	N	0	0	0	1	0	0	0	0	m	59	medium	0	0	0	0
9046TR8544	1	0	0	0	0	0	0	0	0	0	0	0	0	0	0	0	0	0	0	0	0	0	0	0	0	0	0	0	0	0	0	0	A	0	0	0	0	0	0	0	0	f	44	high	0	0	0	0
9059TR8563	0	0	0	0	0	0	1	0	0	0	0	0	0	1	1	0	0	0	0	0	0	0	0	0	0	0	0	0	0	0	0	0	A	0	0	0	0	1	0	0	0	f	48	medium	0	0	0	1
9064TR8567	1	0	0	0	0	0	0	0	0	0	0	0	0	0	0	0	0	0	0	0	0	0	0	0	0	0	0	0	0	0	0	0	A	0	0	0	0	0	0	0	1	m	61	medium	0	0	0	0
9083TR8587	0	0	0	0	0	0	0	0	0	0	0	0	1	0	0	0	0	0	0	0	0	0	0	0	0	0	0	0	0	1	0	0	A	0	0	0	0	0	0	0	0	f	29	medium	0	1	2	1
9084TR8589	0	0	0	0	0	0	0	0	0	0	0	0	0	0	0	0	0	0	0	0	1	0	0	0	0	0	0	0	0	0	0	0	N	0	0	0	0	0	0	0	0	f	49	high	2	0	0	0
9086TR8591	0	0	0	0	0	0	0	0	0	0	0	0	1	0	0	0	0	0	0	0	0	0	0	1	0	0	0	1	0	0	0	0	N	0	0	0	1	0	0	0	0	f	44	high	1	0	0	1
9089TR8595	1	0	0	0	0	0	0	0	0	0	0	0	0	0	0	0	0	0	0	0	0	0	0	0	0	0	0	0	0	0	0	0	N	0	0	0	0	0	0	0	0	m	42	medium	0	0	0	0
9090TR8597	1	0	0	0	0	0	0	0	0	0	0	0	0	0	0	0	0	0	0	0	0	0	0	0	0	0	0	0	0	0	0	0	N	0	0	0	1	0	0	0	0	f	10	medium	0	0	0	0
9092TR8600	0	0	0	0	0	0	0	0	0	0	0	0	0	0	0	0	0	0	0	0	0	0	0	0	0	0	0	0	0	0	0	0	N	0	0	0	0	0	0	0	0	m	74	high	0	0	0	1
9093TR8602	1	0	0	0	0	0	0	0	0	0	0	0	0	0	0	0	0	0	0	0	0	0	0	0	0	0	0	0	0	0	0	0	N	0	0	0	0	0	0	0	0	f	40	medium	0	0	0	0
9096TR8605	0	0	0	0	0	0	0	0	0	0	0	0	0	0	1	0	0	0	0	0	0	0	0	0	0	0	0	0	0	0	0	0	N	0	0	0	0	0	0	0	0	m	75	high	0	0	0	1
9107TR8619	1	0	0	0	0	0	0	0	0	0	0	0	0	0	0	0	0	0	0	0	0	0	0	0	0	0	0	0	0	0	0	0	N	0	0	0	0	1	0	0	0	f	37	high	0	0	0	0
9108TR8620	0	0	0	0	0	0	0	0	0	0	0	0	1	0	0	0	0	0	0	0	0	0	0	0	0	1	0	0	0	0	0	0	N	0	0	0	0	0	0	0	0	f	45	high	1	0	0	1
9121TR8642	0	0	0	0	0	1	0	0	0	0	0	0	1	0	0	0	0	0	0	1	0	0	1	1	0	0	0	0	0	0	0	0	A	0	0	0	1	0	0	0	0	f	57	medium	2	0	0	0
9131TR8650	1	0	0	0	0	0	0	0	0	0	0	0	0	0	0	0	0	0	0	0	0	0	0	0	0	0	0	0	0	0	0	0	N	0	0	0	0	0	0	1	0	m	14	high	0	0	0	0
9132TR8651	1	0	0	0	0	0	0	0	0	0	0	0	0	0	0	0	0	0	0	0	0	0	0	0	0	0	0	0	0	0	0	0	N	0	0	0	0	0	0	0	0	f	57	high	0	0	0	1
9134TR8653	0	0	0	0	0	0	0	0	0	0	0	0	0	0	0	0	0	0	0	0	0	0	0	0	0	0	0	0	0	0	1	0	N	0	0	0	0	0	0	0	0	f	71	medium	1	0	0	0
9137TR8657	0	0	0	0	0	0	0	0	0	0	0	0	1	0	0	0	0	0	0	0	0	0	0	0	0	0	0	0	0	0	0	0	N	0	0	0	0	0	0	0	1	m	56	medium	1	0	0	0
9143TR8669	1	0	0	0	0	0	0	0	0	0	0	0	0	0	0	0	0	0	0	0	0	0	0	0	0	0	0	0	0	0	0	0	N	0	0	0	0	0	0	0	0	f	10	high	0	0	0	0
9146TR8674	0	0	0	0	0	0	0	0	0	0	0	0	0	0	0	0	0	0	0	1	0	0	0	0	0	0	0	0	0	0	0	0	N	0	0	0	0	0	1	0	0	f	36	high	0	0	0	0
9149TR8675	1	0	0	0	0	0	0	0	0	0	0	0	0	0	0	0	0	0	0	0	0	0	0	0	0	0	0	0	0	0	0	0	A	0	0	0	0	0	0	0	0	f	19	medium	2	0	0	0
9151TR8692	0	0	0	0	0	0	1	0	0	0	0	0	0	0	0	0	0	0	0	0	0	0	0	0	0	0	0	0	0	0	0	0	N	0	0	0	0	0	0	0	0	m	59	high	1	0	0	0
9152TR8678	1	0	0	0	0	0	0	0	0	0	0	0	0	0	0	0	0	0	0	0	0	0	0	0	0	0	0	0	0	0	0	0	N	0	0	0	0	0	0	0	0	m	41	high	0	0	0	1
9154TR8680	0	0	0	0	0	0	0	0	0	0	0	0	0	0	1	0	0	0	0	0	0	0	0	1	0	0	0	0	0	0	1	0	N	0	0	0	0	1	0	0	0	m	39	medium	0	0	0	0
9157TR8688	1	0	0	0	0	0	0	0	0	0	0	0	0	0	0	0	0	0	0	0	0	0	0	0	0	0	0	0	0	0	0	0	A	0	0	0	0	1	0	0	0	m	70	medium	1	0	0	0
9162TR8694	0	0	0	0	0	0	0	0	0	0	0	0	0	0	0	0	0	0	0	1	0	0	0	0	0	0	0	0	0	0	0	0	N	0	0	0	0	1	0	0	0	f	52	medium	0	0	0	0
9187TR8723	1	0	0	0	0	0	0	0	0	0	0	0	0	0	0	0	0	0	0	0	0	0	0	0	0	0	0	0	0	0	0	0	N	0	0	0	0	0	0	0	0	f	9	high	0	0	0	0
9190TR8726	0	0	0	0	0	0	0	0	0	0	1	0	1	0	0	0	0	0	1	0	0	0	1	0	0	0	0	0	0	0	1	0	N	0	0	0	0	0	0	0	0	f	53	high	0	0	0	0
9194TR8733	0	0	0	0	0	0	0	0	0	0	0	0	0	0	1	0	0	0	0	0	0	0	0	0	0	0	0	0	0	0	0	0	N	0	0	0	0	0	0	0	0	m	44	high	0	0	0	1
9205TR8751	0	0	0	0	0	0	0	0	0	0	0	0	0	1	1	0	0	0	0	0	0	0	0	0	0	0	0	1	0	0	0	0	N	0	0	0	0	0	0	0	0	f	63	medium	3	0	0	1
9207TR8753	1	0	0	0	0	0	0	0	0	0	0	0	0	0	0	0	0	0	0	0	0	0	0	0	0	0	0	0	0	0	0	0	N	0	0	0	0	0	0	0	0	m	59	high	0	0	0	0
9212TR8759	1	0	0	0	0	0	0	0	0	0	0	0	0	0	0	0	0	0	0	0	0	0	0	0	0	0	0	0	0	0	0	0	A	0	0	0	0	0	1	0	1	m	30	high	1	1	0	0
9215TR8766	0	0	0	0	0	0	0	0	0	0	0	0	1	0	0	0	0	0	0	0	0	0	0	0	0	0	0	0	0	0	0	0	N	0	0	0	1	0	0	0	0	f	10	high	0	0	0	1
9242TR8797	1	0	0	0	0	0	0	0	0	0	0	0	0	0	0	0	0	0	0	0	0	0	0	0	0	0	0	0	0	0	0	0	N	0	0	0	0	0	0	0	1	m	54	high	0	0	0	1
9249TR8805	0	0	0	0	0	0	1	0	0	0	0	0	0	0	0	0	0	0	0	0	0	0	0	0	1	0	0	0	0	0	0	0	A	0	0	0	0	0	0	0	0	m	57	high	2	0	0	1
9254TR8832	1	0	0	0	0	0	0	0	0	0	0	0	0	0	0	0	0	0	0	0	0	0	0	0	0	0	0	0	0	0	0	0	N	0	0	0	0	0	0	0	0	f	9	high	0	0	0	0
9262TR8821	0	0	0	0	0	0	0	0	0	0	0	0	0	0	0	0	0	0	0	0	1	0	0	0	0	0	0	0	0	0	0	0	N	0	0	0	0	0	0	0	1	m	41	medium	1	0	0	1
9265TR8824	0	0	0	0	0	0	0	0	0	0	0	0	0	0	0	0	0	0	0	0	0	0	0	1	0	0	0	0	0	0	0	0	N	0	0	0	0	0	0	0	0	m	63	high	1	1	2	0
9267TR8825	0	0	0	0	1	0	0	0	0	0	1	0	0	0	0	1	0	0	1	0	0	0	0	1	0	1	0	0	0	0	0	0	N	0	0	0	0	0	0	0	0	f	32	high	0	0	0	1
9281TR8856	1	0	0	0	0	0	0	0	0	0	0	0	0	0	0	0	0	0	0	0	0	0	0	0	0	0	0	0	0	0	0	0	A	0	0	0	0	0	0	0	1	f	43	medium	0	0	0	1
9282TR8845	1	0	0	0	0	0	0	0	0	0	0	0	0	0	0	0	0	0	0	0	0	0	0	0	0	0	0	0	0	0	0	0	N	0	0	0	0	0	0	0	0	m	70	high	0	0	0	0
9290TR8862	0	0	0	0	0	0	0	0	0	0	0	0	0	0	0	1	0	0	0	1	0	0	0	0	0	0	0	0	0	0	0	0	N	0	1	0	0	0	0	0	0	f	56	high	2	0	0	0
9297TR8869	1	0	0	0	0	0	0	0	0	0	0	0	0	0	0	0	0	0	0	0	0	0	0	0	0	0	0	0	0	0	0	0	A	1	0	0	0	0	0	0	0	m	67	medium	4	0	0	0
9301TR8871	0	0	0	1	0	1	1	0	0	0	1	0	0	0	0	1	0	0	0	1	0	0	0	0	0	0	0	0	1	0	1	0	N	0	0	0	0	0	0	0	0	m	37	high	0	1	1	1
9311TR8885	0	0	0	0	1	0	1	1	0	0	0	0	0	0	0	0	1	0	1	0	0	0	0	1	0	1	0	0	0	0	1	0	N	0	0	0	0	0	0	0	0	m	25	high	1	0	0	0
9326TR0950a	1	0	0	0	0	0	0	0	0	0	0	0	0	0	0	0	0	0	0	0	0	0	0	0	0	0	0	0	0	0	0	0	N	0	0	0	0	0	0	0	0	m	54	high	0	0	0	0
9342TR8921	0	0	0	0	0	1	0	0	0	0	0	0	1	0	0	0	0	0	0	1	0	0	0	0	1	0	1	0	0	0	1	0	N	0	0	0	0	0	0	0	0	f	32	high	1	0	0	1
9364TR8950	0	0	0	0	0	0	0	0	0	0	0	0	0	0	0	0	0	0	0	0	0	0	0	0	0	0	0	0	0	0	0	0	N	0	0	0	0	0	0	0	1	m	16	high	1	0	0	1
9366TR8965	1	0	0	0	0	0	0	0	0	0	0	0	0	0	0	0	0	0	0	0	0	0	0	0	0	0	0	0	0	0	0	0	N	0	0	0	0	1	0	0	0	f	48	high	1	0	0	0
9384TR8976	0	0	0	0	0	0	0	0	0	0	0	0	0	0	0	0	0	0	0	1	0	0	0	0	0	0	0	0	0	0	0	0	N	0	0	0	1	0	0	0	0	m	68	high	1	0	0	1
9412TR9000	1	0	0	0	0	0	0	0	0	0	0	0	0	0	0	0	0	0	0	0	0	0	0	0	0	0	0	0	0	0	0	0	N	0	0	0	0	1	1	0	0	f	11	high	0	0	0	1
9413TR9001	0	0	0	0	0	0	0	0	0	0	0	0	1	1	0	0	0	0	0	0	0	0	0	0	0	0	0	0	0	0	0	0	N	0	0	0	0	1	0	0	0	f	48	medium	0	0	0	0
9416TR9003	0	0	0	0	0	0	0	0	0	0	0	0	1	0	0	0	0	0	0	0	0	0	0	0	0	0	0	0	0	0	0	0	N	0	0	0	0	1	0	0	0	m	12	high	0	0	0	1
9420TR9006	0	0	0	0	0	0	0	0	0	0	0	0	1	0	0	0	0	0	0	0	0	0	0	0	0	0	0	0	0	0	1	0	N	0	1	0	0	1	0	0	0	f	10	high	0	0	0	1
9425TR9012	0	0	0	0	0	0	0	0	0	0	0	0	0	1	0	0	0	0	0	0	0	0	0	0	0	1	0	0	1	0	0	0	N	1	0	0	0	0	0	0	0	m	25	high	1	0	0	0
9433TR9017	0	0	0	0	0	0	0	0	0	0	0	0	0	1	1	0	0	0	0	0	0	0	0	0	0	0	0	0	0	0	0	0	N	0	0	0	0	0	0	0	0	m	38	low	0	0	0	1
9434TR9020	0	0	0	0	0	0	0	0	0	0	0	0	0	0	0	0	0	0	0	0	0	0	1	1	1	0	0	0	0	0	1	0	N	0	0	0	0	0	0	0	1	m	28	medium	0	0	0	0
9451TR9036	0	0	0	0	0	1	0	1	0	0	0	0	1	0	0	0	0	0	0	0	1	1	0	0	0	0	0	0	0	1	1	0	A	0	0	0	1	0	0	0	1	f	51	high	2	0	0	0
9455TR9049	0	0	0	1	1	0	1	0	0	0	1	0	1	0	0	0	0	0	0	0	0	0	0	1	0	0	0	1	1	0	1	0	N	0	1	0	0	1	0	0	0	f	44	high	1	0	0	1
9456TR9048	1	0	0	0	0	0	0	0	0	0	0	0	0	0	0	0	0	0	0	0	0	0	0	0	0	0	0	0	0	0	0	0	N	0	0	0	0	0	0	0	0	f	55	high	3	0	0	0
9467TR9066	1	0	0	0	0	0	0	0	0	0	0	0	0	0	0	0	0	0	0	0	0	0	0	0	0	0	0	0	0	0	0	0	A	0	0	0	0	1	0	0	0	m	41	medium	0	0	0	0
9477TR9091	1	0	0	0	0	0	0	0	0	0	0	0	0	0	0	0	0	0	0	0	0	0	0	0	0	0	0	0	0	0	0	0	N	0	0	0	0	0	0	1	0	f	54	high	1	0	0	0
9480TR9095	0	0	0	0	0	0	0	1	0	0	0	0	0	0	0	0	0	0	0	0	0	0	0	0	0	0	0	0	0	0	0	0	A	0	0	0	0	1	0	0	1	f	50	high	1	0	0	0
9481TR9096	0	0	0	0	1	0	0	0	0	0	1	0	0	0	0	0	0	0	0	0	0	0	0	0	1	0	0	0	0	0	1	0	N	0	0	0	0	0	0	0	0	m	33	medium	1	1	0	1
9485TR9112	1	0	0	0	0	0	0	0	0	0	0	0	0	0	0	0	0	0	0	0	0	0	0	0	0	0	0	0	0	0	0	0	N	0	0	0	0	1	0	0	0	m	19	medium	0	0	0	1
9491TR9167	0	0	0	0	0	0	0	0	0	0	0	0	0	0	0	0	1	0	0	0	0	0	1	0	0	0	1	0	1	0	0	0	N	0	0	0	0	0	0	0	1	m	56	high	1	0	0	0
9493TR9128	0	0	0	0	0	0	0	0	0	0	0	0	0	0	1	0	0	0	0	0	0	1	0	0	0	0	0	0	1	0	0	0	A	0	0	0	0	0	0	0	0	f	52	high	3	0	0	1
9494TR9129	0	0	0	0	0	0	0	0	0	0	0	0	0	0	0	0	0	0	0	0	0	0	0	0	0	0	0	0	0	0	0	0	N	0	0	0	0	1	0	0	0	m	71	medium	1	0	0	0
9495TR9130	1	0	0	0	0	0	0	0	0	0	0	0	0	0	0	0	0	0	0	0	0	0	0	0	0	0	0	0	0	0	0	0	N	0	0	0	0	0	0	0	0	m	67	high	1	0	0	0
9497TR9134	1	0	0	0	0	0	0	0	0	0	0	0	0	0	0	0	0	0	0	0	0	0	0	0	0	0	0	0	0	0	0	0	N	0	0	0	0	0	0	0	0	m	38	medium	2	0	0	0
9499TR9138	0	0	0	0	0	0	0	0	0	0	0	0	0	0	0	0	0	0	0	1	0	0	0	0	0	0	0	0	0	1	1	0	N	0	0	0	1	0	0	0	0	m	34	high	0	0	0	1
9501TR9141	0	0	0	0	0	1	1	1	0	0	0	0	0	0	0	0	0	0	0	1	0	0	0	0	0	0	0	1	0	1	1	0	N	0	0	0	0	0	0	0	0	f	52	high	0	0	0	1
9504TR9148	1	0	0	0	0	0	0	0	0	0	0	0	0	0	0	0	0	0	0	0	0	0	0	0	0	0	0	0	0	0	0	0	A	0	0	0	1	0	0	0	0	f	41	high	0	0	0	0
9505TR9149	1	0	0	0	0	0	0	0	0	0	0	0	0	0	0	0	0	0	0	0	0	0	0	0	0	0	0	0	0	0	0	0	N	0	0	0	1	0	0	0	0	m	45	medium	0	0	0	1
9512TR9156	0	0	0	0	0	0	0	0	0	0	0	0	1	0	0	0	0	0	0	0	0	0	0	0	0	0	0	1	0	0	0	0	N	0	0	0	0	0	0	0	0	m	55	high	1	0	0	1
9513TR9160	0	0	0	0	0	0	0	0	0	0	0	0	0	0	0	0	0	0	0	0	0	0	0	0	0	0	0	0	0	0	1	0	N	1	0	0	0	0	0	0	1	m	36	medium	0	1	1	1
9517TR9165	1	0	0	0	0	0	0	0	0	0	0	0	0	0	0	0	0	0	0	0	0	0	0	0	0	0	0	0	0	0	0	0	N	0	0	0	0	0	0	0	1	f	60	medium	0	0	0	1
9520TR9171	1	0	0	0	0	0	0	0	0	0	0	0	0	0	0	0	0	0	0	0	0	0	0	0	0	0	0	0	0	0	0	0	N	0	0	0	1	0	0	0	0	f	59	medium	1	0	0	0
9521TR9174	1	0	0	0	0	0	0	0	0	0	0	0	0	0	0	0	0	0	0	0	0	0	0	0	0	0	0	0	0	0	0	0	N	0	0	0	0	1	0	0	0	m	49	high	0	0	0	1
9535TR9192	1	0	0	0	0	0	0	0	0	0	0	0	0	0	0	0	0	0	0	0	0	0	0	0	0	0	0	0	0	0	0	0	N	0	0	0	0	0	0	0	0	f	60	medium	0	0	0	1
9536TR9194	1	0	0	0	0	0	0	0	0	0	0	0	0	0	0	0	0	0	0	0	0	0	0	0	0	0	0	0	0	0	0	0	A	0	0	0	0	0	0	0	0	m	66	high	0	1	2	1
9544TR9204	0	0	0	0	0	1	0	0	0	0	0	0	0	1	1	0	0	0	0	0	0	0	0	0	0	0	1	0	0	1	1	0	N	0	0	0	0	0	0	0	0	f	62	medium	2	0	0	0
9547TR9209	1	0	0	0	0	0	0	0	0	0	0	0	0	0	0	0	0	0	0	0	0	0	0	0	0	0	0	0	0	0	0	0	N	0	0	0	0	0	0	0	1	m	68	high	0	0	0	0
9551TR9213	0	0	0	0	0	0	0	0	0	1	1	0	0	0	0	1	1	0	0	1	0	0	1	1	0	1	0	0	1	1	0	0	A	0	0	0	0	0	0	0	0	f	45	medium	2	0	0	0
9552TR9212	1	0	0	0	0	0	0	0	0	0	0	0	0	0	0	0	0	0	0	0	0	0	0	0	0	0	0	0	0	0	0	0	A	0	0	0	0	0	0	0	0	m	31	medium	0	0	0	0
9553TR9214	1	0	0	0	0	0	0	0	0	0	0	0	0	0	0	0	0	0	0	0	0	0	0	0	0	0	0	0	0	0	0	0	N	0	0	0	0	1	0	0	0	f	61	high	1	0	0	1
9555TR9230	0	0	0	0	1	0	1	1	0	0	0	0	1	1	1	0	0	0	1	0	0	0	1	1	0	1	0	0	0	1	1	0	N	0	0	0	0	0	0	0	1	f	66	medium	1	1	1	0
9556TR9218	1	0	0	0	0	0	0	0	0	0	0	0	0	0	0	0	0	0	0	0	0	0	0	0	0	0	0	0	0	0	0	0	N	0	0	0	0	0	0	0	0	m	56	medium	2	0	0	1
9557TR9222	1	0	0	0	0	0	0	0	0	0	0	0	0	0	0	0	0	0	0	0	0	0	0	0	0	0	0	0	0	0	0	0	N	0	0	0	0	1	0	0	0	f	54	medium	2	0	0	0
9562TR9228	0	0	0	0	1	0	0	0	0	0	0	0	0	0	0	0	0	0	0	0	0	0	0	0	0	0	0	0	0	0	0	0	N	0	0	0	0	0	0	0	1	f	47	medium	0	0	0	0
9563TR9229	1	0	0	0	0	0	0	0	0	0	0	0	0	0	0	0	0	0	0	0	0	0	0	0	0	0	0	0	0	0	0	0	N	0	0	0	0	0	1	0	1	m	23	high	2	0	0	1
9575TR9241	0	0	0	0	0	0	0	0	0	0	0	0	0	0	0	0	0	0	0	0	0	0	1	0	1	0	0	1	0	0	0	0	N	0	0	0	0	1	0	0	0	m	37	high	0	0	0	0
9613TR9280	1	0	0	0	0	0	0	0	0	0	0	0	0	0	0	0	0	0	0	0	0	0	0	0	0	0	0	0	0	0	0	0	N	0	0	0	1	0	0	0	0	m	71	high	0	0	0	1
9619TR9294	1	0	0	0	0	0	0	0	0	0	0	0	0	0	0	0	0	0	0	0	0	0	0	0	0	0	0	0	0	0	0	0	N	0	0	0	0	0	0	0	1	m	42	high	0	0	0	0
9628TR9310	0	0	0	0	0	0	1	0	0	0	0	0	0	0	1	0	0	0	0	0	0	0	0	1	0	0	0	0	0	1	0	0	A	0	0	0	0	0	0	0	0	m	54	high	0	0	0	1
9632TR9315	0	0	0	0	0	0	0	0	0	0	0	0	1	0	0	0	0	0	0	0	0	0	0	0	1	0	0	1	0	0	1	0	N	0	0	0	0	1	0	0	0	f	37	medium	1	0	0	0
9638TR9321	0	0	0	0	0	0	0	0	0	0	0	0	0	0	0	0	0	0	0	0	0	0	0	0	0	0	0	0	0	0	1	0	N	0	0	0	0	0	0	0	0	m	54	high	1	1	2	1
9641TR9323	0	0	0	0	0	0	1	0	0	0	1	0	0	0	0	0	0	0	0	1	0	0	0	0	0	0	0	0	0	0	0	0	N	0	0	0	0	0	0	0	1	m	58	medium	1	0	0	0
9647TR9333	1	0	0	0	0	0	0	0	0	0	0	0	0	0	0	0	0	0	0	0	0	0	0	0	0	0	0	0	0	0	0	0	N	0	0	0	0	0	0	0	0	f	39	high	0	0	0	1
9649TR9334	0	0	0	0	0	0	0	0	0	0	0	0	0	0	0	0	0	0	0	0	0	1	1	0	0	0	0	0	0	0	0	0	N	0	0	0	0	0	0	0	0	m	13	high	0	0	0	0
9657TR9408	1	0	0	0	0	0	0	0	0	0	0	0	0	0	0	0	0	0	0	0	0	0	0	0	0	0	0	0	0	0	0	0	N	0	0	0	0	1	0	0	1	f	13	high	0	0	0	1
9659TR9344	0	0	0	0	0	0	0	0	0	0	1	0	0	0	0	0	0	0	0	0	0	0	0	0	0	0	0	0	0	0	0	0	N	0	0	0	0	0	0	0	0	m	52	high	0	0	0	1
9662TR9346	1	0	0	0	0	0	0	0	0	0	0	0	0	0	0	0	0	0	0	0	0	0	0	0	0	0	0	0	0	0	0	0	N	0	0	0	0	0	0	0	0	m	14	high	0	0	0	0
9663TR9347	1	0	0	0	0	0	0	0	0	0	0	0	0	0	0	0	0	0	0	0	0	0	0	0	0	0	0	0	0	0	0	0	N	0	0	0	0	0	0	0	0	f	67	medium	0	0	0	1
9669TR9358	1	0	0	0	0	0	0	0	0	0	0	0	0	0	0	0	0	0	0	0	0	0	0	0	0	0	0	0	0	0	0	0	N	0	0	0	0	0	0	0	1	f	69	high	0	0	0	0
9685TR9380	0	0	0	1	0	1	1	1	0	0	1	1	1	1	1	0	0	0	0	0	0	0	1	1	1	1	0	1	1	0	1	1	A	0	0	0	0	0	0	0	0	m	39	high	7	0	0	1
9687TR9382	0	0	0	0	1	0	1	0	0	0	0	0	1	0	0	0	0	0	0	0	1	0	0	0	0	0	0	0	0	0	0	0	N	0	0	0	0	0	0	0	0	m	69	high	3	0	0	0
9697TR9396	1	0	0	0	0	0	0	0	0	0	0	0	0	0	0	0	0	0	0	0	0	0	0	0	0	0	0	0	0	0	0	0	N	0	0	0	0	1	0	0	0	m	66	high	0	0	0	0
9703TR9407	1	0	0	0	0	0	0	0	0	0	0	0	0	0	0	0	0	0	0	0	0	0	0	0	0	0	0	0	0	0	0	0	N	0	0	0	0	1	0	0	0	m	14	high	0	0	0	0
9708TR9416	0	0	0	0	0	0	0	1	0	0	0	0	0	0	0	0	0	0	0	0	1	0	1	0	0	0	0	0	0	0	0	0	N	0	0	0	0	0	0	0	0	m	66	high	1	0	0	1
9709TR9417	1	0	0	0	0	0	0	0	0	0	0	0	0	0	0	0	0	0	0	0	0	0	0	0	0	0	0	0	0	0	0	0	N	0	0	0	0	0	0	0	1	m	73	medium	0	0	0	0
9716TR9427	0	0	0	1	0	0	0	0	0	0	0	0	0	0	0	0	0	0	0	0	0	0	0	0	0	0	0	0	0	0	1	0	N	0	0	0	0	1	0	0	0	f	58	high	1	0	0	1
9725TR9444	1	0	0	0	0	0	0	0	0	0	0	0	0	0	0	0	0	0	0	0	0	0	0	0	0	0	0	0	0	0	0	0	A	0	0	0	0	0	0	0	1	m	64	high	0	0	0	1
9726TR9462	0	0	0	0	0	0	0	0	0	0	0	0	0	0	0	0	0	0	0	0	0	0	0	0	0	0	0	0	0	0	1	0	N	0	0	0	0	0	0	0	0	f	39	high	1	0	0	0
9732TR9450	0	0	0	0	0	0	1	0	0	0	1	0	0	0	0	0	0	0	0	0	1	0	0	0	0	1	0	0	0	0	1	0	A	0	0	0	0	0	0	0	0	m	47	medium	2	0	0	1
9734TR9454	1	0	0	0	0	0	0	0	0	0	0	0	0	0	0	0	0	0	0	0	0	0	0	0	0	0	0	0	0	0	0	0	N	0	0	0	0	0	0	0	0	m	51	high	1	0	0	1
9735TR9455	0	0	0	0	0	0	0	0	0	0	0	0	0	0	0	0	0	0	0	1	1	0	1	0	0	1	0	0	0	1	1	0	N	0	0	0	0	0	0	0	0	m	15	medium	0	0	0	0
9748TR4914b	0	0	0	0	0	0	0	0	0	1	0	0	0	0	0	0	0	0	0	0	0	0	0	0	0	0	0	0	0	0	0	0	N	0	0	0	0	0	0	0	0	m	70	high	0	1	0	1
9750TR9476	1	0	0	0	0	0	0	0	0	0	0	0	0	0	0	0	0	0	0	0	0	0	0	0	0	0	0	0	0	0	0	0	N	1	0	0	0	1	0	0	0	f	11	high	0	0	0	1
9752TR9583	0	0	0	0	0	0	0	0	0	0	0	0	0	0	0	0	0	0	0	0	0	0	0	0	0	0	0	0	0	1	0	1	N	0	0	0	1	0	0	0	1	m	70	high	2	0	0	0
9753TR9481	0	0	0	0	0	1	0	0	0	0	0	0	1	0	0	0	0	0	0	0	0	1	1	1	1	0	0	0	0	0	0	0	N	0	0	0	0	0	0	0	0	f	50	medium	6	1	0	0
9765TR9496	0	0	0	0	0	0	0	0	0	0	0	0	0	0	0	0	0	0	0	1	0	0	1	0	0	0	0	0	1	0	0	0	N	0	0	0	1	0	0	0	0	f	52	high	0	0	0	0
9766TR9500	0	0	0	0	0	0	0	0	0	0	0	0	1	0	0	0	0	0	0	1	0	0	0	0	0	0	0	0	1	0	0	0	N	0	0	0	0	1	0	0	0	f	56	high	1	0	0	0
9769TR9502	0	0	0	0	0	0	0	0	0	0	1	0	0	0	0	1	0	0	0	0	0	0	0	0	0	0	0	0	0	0	1	0	N	0	0	0	1	0	0	0	0	f	38	medium	0	0	0	1
9784TR9526	0	0	0	0	0	0	0	0	0	0	0	0	1	0	0	0	0	0	0	0	0	0	0	0	0	0	0	0	0	0	1	0	N	0	0	0	0	0	0	0	0	f	57	medium	1	0	0	0
9790TR9531	0	0	0	0	0	0	0	0	0	0	0	0	0	1	1	0	0	0	0	0	0	0	0	0	0	0	0	0	0	0	0	0	A	0	0	0	1	0	0	0	1	f	54	high	2	0	0	1
9802TR9543	1	0	0	0	0	0	0	0	0	0	0	0	0	0	0	0	0	0	0	0	0	0	0	0	0	0	0	0	0	0	0	0	N	0	0	0	0	0	0	0	0	f	12	medium	0	0	0	0
9813TR9565	1	0	0	0	0	0	0	0	0	0	0	0	0	0	0	0	0	0	0	0	0	0	0	0	0	0	0	0	0	0	0	0	N	0	0	0	0	1	0	0	0	m	70	medium	0	0	0	0
9815TR9568	0	0	0	0	0	0	1	0	0	0	0	0	1	0	0	0	0	0	1	0	0	0	0	0	0	0	0	0	0	0	0	0	A	0	0	0	0	0	0	0	0	f	36	medium	1	0	0	1
9834TR9639	1	0	0	0	0	0	0	0	0	0	0	0	0	0	0	0	0	0	0	0	0	0	0	0	0	0	0	0	0	0	0	0	N	0	0	0	0	0	0	1	0	m	43	high	0	0	0	0
9836TR9597	1	0	0	0	0	0	0	0	0	0	0	0	0	0	0	0	0	0	0	0	0	0	0	0	0	0	0	0	0	0	0	0	N	0	0	0	0	1	0	0	0	m	17	high	0	0	0	0
9840TR9599	1	0	0	0	0	0	0	0	0	0	0	0	0	0	0	0	0	0	0	0	0	0	0	0	0	0	0	0	0	0	0	0	N	0	0	0	1	0	0	0	0	m	13	medium	0	0	0	0
9842TR9605	1	0	0	0	0	0	0	0	0	0	0	0	0	0	0	0	0	0	0	0	0	0	0	0	0	0	0	0	0	0	0	0	A	0	0	0	0	0	0	0	0	m	66	medium	0	0	0	1
9844TR9608	1	0	0	0	0	0	0	0	0	0	0	0	0	0	0	0	0	0	0	0	0	0	0	0	0	0	0	0	0	0	0	0	A	0	0	0	0	0	0	0	0	m	72	high	2	0	0	0
9849TR9611	0	0	0	0	0	0	0	0	0	0	1	0	0	0	0	0	0	0	0	0	0	0	0	0	0	0	0	0	0	0	0	0	N	0	0	0	0	0	0	0	0	m	59	high	0	0	0	0
9855TR9619	1	0	0	0	0	0	0	0	0	0	0	0	0	0	0	0	0	0	0	0	0	0	0	0	0	0	0	0	0	0	0	0	A	0	0	0	0	0	0	0	0	f	49	high	1	0	0	0
9860TR7623a	0	0	0	0	0	0	0	0	0	0	0	0	0	1	0	0	0	0	0	0	0	0	1	1	0	0	1	0	0	1	1	1	N	0	0	0	1	0	0	0	0	f	65	medium	1	0	0	1
9863TR9635	1	0	0	0	0	0	0	0	0	0	0	0	0	0	0	0	0	0	0	0	0	0	0	0	0	0	0	0	0	0	0	0	N	0	0	0	0	0	0	0	0	m	40	high	0	0	0	0
9866TR9637	1	0	0	0	0	0	0	0	0	0	0	0	0	0	0	0	0	0	0	0	0	0	0	0	0	0	0	0	0	0	0	0	N	0	0	0	0	0	0	0	0	f	47	high	0	0	0	0
9867TR9672	1	0	0	0	0	0	0	0	0	0	0	0	0	0	0	0	0	0	0	0	0	0	0	0	0	0	0	0	0	0	0	0	N	0	0	0	0	0	0	0	0	m	67	high	0	0	0	1
9869TR9642	1	0	0	0	0	0	0	0	0	0	0	0	0	0	0	0	0	0	0	0	0	0	0	0	0	0	0	0	0	0	0	0	N	0	0	0	1	0	0	0	1	f	11	high	0	0	0	0
9871TR0913b	0	0	0	0	0	0	0	0	0	0	0	0	0	0	0	0	0	0	0	0	0	0	0	1	0	0	0	0	0	0	0	0	N	0	0	0	0	0	0	0	0	f	31	high	0	0	0	0
9872TR9644	0	0	0	0	0	1	1	0	0	0	1	0	0	0	0	0	0	0	0	1	0	0	1	0	1	0	0	1	0	0	1	0	N	0	0	0	0	1	0	0	0	f	43	medium	1	1	2	1
9883TR9658	1	0	0	0	0	0	0	0	0	0	0	0	0	0	0	0	0	0	0	0	0	0	0	0	0	0	0	0	0	0	0	0	N	0	0	0	0	1	0	0	0	m	15	high	0	0	0	0
9897TR9680	0	0	0	0	0	0	0	0	0	0	0	0	0	0	0	0	0	0	0	0	0	0	0	0	0	0	0	0	1	0	0	0	N	0	0	0	0	0	0	0	0	f	48	high	0	0	0	0
9909TR9695	0	0	0	0	0	0	0	0	0	0	0	0	1	1	0	0	0	0	0	1	0	0	0	0	0	0	1	0	0	0	0	0	N	0	0	0	0	0	0	0	0	m	62	high	1	1	0	0
9912TR9700	0	0	0	0	0	0	0	1	0	0	0	0	1	0	0	0	1	0	0	1	0	0	1	1	0	1	1	0	1	1	1	0	A	0	0	0	0	0	0	1	0	f	55	medium	1	0	0	1
9913TR9751	0	0	0	0	0	1	1	0	0	1	0	0	0	0	0	0	0	0	1	1	0	0	0	1	0	1	0	0	0	0	1	0	N	0	0	0	0	1	0	0	0	f	42	high	1	0	0	1
9937TR9732	1	0	0	0	0	0	0	0	0	0	0	0	0	0	0	0	0	0	0	0	0	0	0	0	0	0	0	0	0	0	0	0	A	0	0	0	1	0	1	0	1	m	64	high	0	0	0	0
9938TR9733	1	0	0	0	0	0	0	0	0	0	0	0	0	0	0	0	0	0	0	0	0	0	0	0	0	0	0	0	0	0	0	0	N	0	0	0	0	0	0	0	0	f	24	high	0	0	0	0
9940TR9735	1	0	0	0	0	0	0	0	0	0	0	0	0	0	0	0	0	0	0	0	0	0	0	0	0	0	0	0	0	0	0	0	N	0	0	0	0	0	0	0	0	f	36	high	0	0	0	0
9942TR9739	0	0	0	0	0	0	1	0	0	0	0	0	0	0	0	0	0	0	0	0	0	0	1	0	0	0	0	0	0	0	1	0	N	0	0	0	0	0	0	0	1	f	32	high	2	0	0	0
9955TR9754	1	0	0	0	0	0	0	0	0	0	0	0	0	0	0	0	0	0	0	0	0	0	0	0	0	0	0	0	0	0	0	0	N	0	0	0	0	0	0	0	0	f	54	high	0	0	0	0
9956TR9756	1	0	0	0	0	0	0	0	0	0	0	0	0	0	0	0	0	0	0	0	0	0	0	0	0	0	0	0	0	0	0	0	N	0	0	0	0	0	0	0	1	f	55	high	0	0	0	1
9963TR9775	0	0	0	0	0	0	0	1	0	1	0	0	1	0	0	0	0	0	1	1	0	0	1	0	0	0	0	0	0	1	1	0	N	0	0	0	1	0	0	0	0	f	53	high	1	0	0	0
9965TR9778	1	0	0	0	0	0	0	0	0	0	0	0	0	0	0	0	0	0	0	0	0	0	0	0	0	0	0	0	0	0	0	0	N	0	0	0	0	1	0	0	0	f	57	high	0	0	0	0
9969TR9794	0	0	0	0	0	0	0	1	0	0	0	0	0	0	0	0	0	0	0	0	0	0	1	0	0	0	0	0	0	0	0	0	N	0	0	1	0	0	0	0	1	m	77	high	1	0	0	0
9971TR9786	0	0	0	0	0	0	0	0	0	0	0	0	0	0	0	0	0	0	1	0	0	0	1	0	0	1	0	0	0	0	0	0	N	0	0	0	1	0	0	0	0	f	68	high	1	0	0	0
9988TR9809	1	0	0	0	0	0	0	0	0	0	0	0	0	0	0	0	0	0	0	0	0	0	0	0	0	0	0	0	0	0	0	0	N	0	0	0	0	0	0	0	0	f	53	high	1	0	0	1
9999TR9820	0	0	0	0	0	0	0	0	0	0	1	0	0	0	0	0	0	0	0	0	0	0	0	0	0	0	0	0	0	0	1	0	N	0	0	0	0	0	0	0	0	m	63	medium	2	0	0	0
a00fTR9842	1	0	0	0	0	0	0	0	0	0	0	0	0	0	0	0	0	0	0	0	0	0	0	0	0	0	0	0	0	0	0	0	N	0	0	0	0	0	0	0	0	m	39	high	0	0	0	0
a00tTR9860	1	0	0	0	0	0	0	0	0	0	0	0	0	0	0	0	0	0	0	0	0	0	0	0	0	0	0	0	0	0	0	0	N	0	0	0	0	0	0	0	1	f	55	medium	1	0	0	0
a00wTR9858	1	0	0	0	0	0	0	0	0	0	0	0	0	0	0	0	0	0	0	0	0	0	0	0	0	0	0	0	0	0	0	0	A	0	0	0	0	0	0	0	1	m	67	high	0	0	0	1
a010TR9862	0	0	0	0	0	0	0	0	0	0	1	0	0	0	0	0	0	0	0	0	0	0	0	0	0	0	0	0	0	0	1	0	N	0	0	0	1	0	0	0	0	m	23	high	0	0	0	1
a01rTR9890	0	0	0	0	0	0	0	0	0	1	0	0	0	0	0	0	0	0	0	0	0	0	1	0	0	0	0	0	0	0	0	0	A	1	0	0	0	0	0	0	0	m	65	medium	2	0	0	0
a01xTR9899	1	0	0	0	0	0	0	0	0	0	0	0	0	0	0	0	0	0	0	0	0	0	0	0	0	0	0	0	0	0	0	0	N	0	0	0	0	0	0	0	0	m	45	high	0	0	0	0
a022TR9901	0	0	0	0	0	0	0	0	0	0	0	0	0	0	0	0	0	0	0	0	0	0	0	0	0	1	0	0	0	0	1	0	N	0	0	0	0	0	0	0	0	m	52	medium	1	0	0	0
a029TR9909	1	0	0	0	0	0	0	0	0	0	0	0	0	0	0	0	0	0	0	0	0	0	0	0	0	0	0	0	0	0	0	0	N	0	0	0	1	0	0	0	0	f	50	high	1	0	0	0
a02dTR9915	0	0	0	0	0	0	0	0	0	0	0	0	0	0	0	0	0	0	0	0	0	0	0	0	0	0	0	0	0	0	1	0	N	0	0	0	0	0	0	0	0	f	39	high	1	0	0	0
a02kTR9925	1	0	0	0	0	0	0	0	0	0	0	0	0	0	0	0	0	0	0	0	0	0	0	0	0	0	0	0	0	0	0	0	N	0	0	0	0	1	0	0	0	m	34	high	0	0	0	1
a02wTR9937	1	0	0	0	0	0	0	0	0	0	0	0	0	0	0	0	0	0	0	0	0	0	0	0	0	0	0	0	0	0	0	0	N	0	0	0	0	1	0	0	0	f	39	medium	1	1	2	1
a03aTR9951	0	0	0	0	1	0	0	0	0	0	0	0	0	0	0	0	0	0	1	0	0	0	0	0	0	0	0	0	0	0	0	0	N	0	0	0	0	0	0	0	0	f	14	high	0	0	0	1
a03eTR6245a	0	0	0	0	0	0	0	0	0	0	0	0	0	1	1	0	0	0	0	0	0	0	0	0	0	0	0	0	0	0	0	0	N	0	0	0	0	1	0	0	1	f	41	high	0	0	0	1
a03mTR9955	0	0	0	0	0	0	0	0	0	0	0	0	0	0	0	0	0	0	0	0	0	1	0	0	0	0	0	0	0	0	0	0	N	0	0	0	0	0	0	0	0	f	58	high	0	0	0	1
a046TR9963	1	0	0	0	0	0	0	0	0	0	0	0	0	0	0	0	0	0	0	0	0	0	0	0	0	0	0	0	0	0	0	0	A	0	0	0	0	0	0	0	1	m	64	high	0	0	0	0
a04hTR9975	0	0	0	0	0	0	0	0	0	0	0	0	0	0	0	0	0	0	1	0	0	0	0	0	0	0	0	0	1	0	1	0	N	0	0	0	0	0	0	0	1	f	53	high	0	0	0	0
a04mTR9979	1	0	0	0	0	0	0	0	0	0	0	0	0	0	0	0	0	0	0	0	0	0	0	0	0	0	0	0	0	0	0	0	A	0	0	0	0	0	0	0	0	m	51	medium	2	0	0	0
a04tTR9984	0	0	0	0	0	0	0	0	0	0	0	0	0	0	0	0	0	0	0	0	0	1	0	0	0	0	0	0	0	0	0	0	N	0	0	0	0	0	0	0	0	m	64	high	0	0	0	0
a052TR9992	0	0	0	0	0	0	0	1	0	0	0	0	0	0	0	0	0	0	0	0	0	0	0	0	0	0	0	0	0	0	0	0	A	0	0	0	0	0	0	0	0	f	58	high	1	0	0	0
a05fTR0003a	1	0	0	0	0	0	0	0	0	0	0	0	0	0	0	0	0	0	0	0	0	0	0	0	0	0	0	0	0	0	0	0	A	0	0	0	0	1	0	0	1	m	45	low	5	0	0	0
a05kTR0007a	0	0	0	0	0	0	1	0	0	0	1	0	1	0	0	1	0	0	1	0	0	0	0	0	0	0	0	0	0	0	0	0	N	0	0	0	0	0	0	0	0	m	14	high	1	0	0	1
a05pTR0009a	1	0	0	0	0	0	0	0	0	0	0	0	0	0	0	0	0	0	0	0	0	0	0	0	0	0	0	0	0	0	0	0	N	0	0	0	0	1	0	0	0	m	44	medium	0	0	0	1
a05xTR5759a	0	0	0	0	0	0	0	0	0	0	0	0	0	0	0	0	0	0	0	0	0	0	1	0	0	0	0	0	0	0	0	0	N	0	0	0	0	0	0	0	1	f	51	medium	0	0	0	0
a060TR0016a	1	0	0	0	0	0	0	0	0	0	0	0	0	0	0	0	0	0	0	0	0	0	0	0	0	0	0	0	0	0	0	0	N	0	0	0	0	0	0	0	1	m	55	medium	1	0	0	0
a063TR0021a	1	0	0	0	0	0	0	0	0	0	0	0	0	0	0	0	0	0	0	0	0	0	0	0	0	0	0	0	0	0	0	0	N	0	0	0	0	0	1	0	1	m	65	high	0	0	0	1
a066TR0028a	1	0	0	0	0	0	0	0	0	0	0	0	0	0	0	0	0	0	0	0	0	0	0	0	0	0	0	0	0	0	0	0	N	0	0	0	0	1	1	0	1	f	44	medium	0	0	0	0
a06eTR0037a	1	0	0	0	0	0	0	0	0	0	0	0	0	0	0	0	0	0	0	0	0	0	0	0	0	0	0	0	0	0	0	0	N	0	0	0	0	0	0	0	1	m	31	high	0	0	0	0
a06kTR0042a	0	0	0	0	0	0	0	0	0	0	0	0	0	0	0	0	0	0	0	0	0	0	1	0	0	0	0	0	0	0	0	0	N	0	0	0	0	0	0	0	0	m	35	medium	0	0	0	0
a06nTR0048a	1	0	0	0	0	0	0	0	0	0	0	0	0	0	0	0	0	0	0	0	0	0	0	0	0	0	0	0	0	0	0	0	N	0	0	0	0	0	0	0	1	f	37	medium	0	0	0	0
a06tTR0050a	0	0	0	1	0	0	0	0	0	0	0	0	0	0	0	0	0	0	0	0	0	0	1	0	1	1	0	0	0	0	1	0	N	0	0	0	0	0	0	0	0	m	39	medium	2	0	0	0
a06wTR0051a	0	0	0	0	0	0	1	0	0	0	0	0	0	0	1	0	0	0	0	0	0	0	0	0	0	1	0	0	0	0	0	0	N	0	0	0	0	0	0	0	0	m	60	medium	1	0	0	1
a072TR0057a	0	0	0	0	0	0	0	0	0	0	1	0	1	0	0	0	0	0	0	0	0	0	1	1	0	1	0	0	0	0	1	0	N	0	0	0	1	0	0	0	1	f	62	high	1	0	0	1
a07pTR0086a	1	0	0	0	0	0	0	0	0	0	0	0	0	0	0	0	0	0	0	0	0	0	0	0	0	0	0	0	0	0	0	0	N	0	0	0	0	0	0	0	0	f	74	medium	5	0	0	0
a086TR8183a	1	0	0	0	0	0	0	0	0	0	0	0	0	0	0	0	0	0	0	0	0	0	0	0	0	0	0	0	0	0	0	0	N	0	0	0	0	1	0	0	0	f	42	high	0	0	0	0
a087TR0100a	1	0	0	0	0	0	0	0	0	0	0	0	0	0	0	0	0	0	0	0	0	0	0	0	0	0	0	0	0	0	0	0	A	0	0	0	0	0	0	0	0	f	55	low	1	0	0	0
a08dTR0104a	0	0	0	0	0	0	0	0	0	0	0	0	0	0	0	0	0	0	0	0	0	0	0	0	0	0	0	0	0	0	1	0	A	0	0	0	0	0	0	1	0	f	33	high	1	0	0	1
a08hTR0108a	0	0	0	0	0	0	0	0	0	0	0	0	0	0	0	0	0	0	0	0	0	0	0	0	0	0	0	0	0	0	1	0	N	0	0	0	0	0	0	0	0	m	45	high	0	0	0	1
a08nTR0110a	0	0	0	0	0	0	0	0	0	0	0	0	0	1	0	0	0	0	0	0	0	0	0	0	0	0	0	0	0	0	0	0	A	0	0	0	0	1	0	0	0	m	53	high	0	0	0	0
a08rTR0115a	1	0	0	0	0	0	0	0	0	0	0	0	0	0	0	0	0	0	0	0	0	0	0	0	0	0	0	0	0	0	0	0	A	0	0	0	0	1	0	0	0	m	63	high	0	0	0	1
a08wTR0116a	0	0	0	0	0	0	0	0	0	0	0	0	0	0	0	0	0	0	0	1	0	0	0	0	0	0	0	0	0	0	0	0	N	0	0	0	0	0	0	0	1	f	43	medium	0	0	0	0
a08xTR0117a	0	0	0	0	0	0	0	0	0	0	0	0	0	0	0	0	0	0	0	0	0	0	0	0	0	0	0	0	0	0	1	0	N	0	0	0	1	0	0	0	0	f	39	high	0	0	0	1
a09cTR0126a	1	0	0	0	0	0	0	0	0	0	0	0	0	0	0	0	0	0	0	0	0	0	0	0	0	0	0	0	0	0	0	0	N	0	0	0	0	0	0	0	0	m	36	low	0	0	0	0
a09dTR0128a	1	0	0	0	0	0	0	0	0	0	0	0	0	0	0	0	0	0	0	0	0	0	0	0	0	0	0	0	0	0	0	0	N	0	0	0	0	0	0	0	0	m	50	high	0	0	0	0
a09fTR0129a	0	0	0	0	0	0	0	0	0	0	0	0	1	0	0	0	0	0	0	0	0	0	0	0	0	0	0	0	0	0	0	0	N	0	0	0	1	0	0	0	0	f	46	high	1	1	0	0
a09rTR0139a	0	0	0	0	0	0	0	0	0	0	0	0	0	0	0	0	0	0	0	1	0	0	0	0	0	0	0	0	0	0	0	0	N	0	0	0	0	0	0	0	0	f	53	high	0	0	0	0
a0a8TR0173a	0	0	0	0	0	0	0	0	0	0	0	0	0	0	0	0	0	0	0	0	0	0	0	1	0	0	0	0	1	1	0	0	N	0	0	0	0	0	0	0	0	m	59	high	1	0	0	1
a0aaTR0176a	1	0	0	0	0	0	0	0	0	0	0	0	0	0	0	0	0	0	0	0	0	0	0	0	0	0	0	0	0	0	0	0	N	0	0	0	0	0	0	0	0	f	31	high	0	0	0	0
a0amTR0189a	0	0	0	0	0	0	0	0	0	0	0	0	0	0	0	0	0	0	0	0	0	0	0	0	0	0	0	0	0	0	1	0	A	0	0	0	0	0	0	0	1	f	65	high	0	0	0	0
a0cxTR0234a	1	0	0	0	0	0	0	0	0	0	0	0	0	0	0	0	0	0	0	0	0	0	0	0	0	0	0	0	0	0	0	0	N	0	0	0	0	0	0	0	0	m	47	high	1	0	0	0
a0d8TR0243a	0	0	0	0	0	0	0	0	0	0	0	0	1	0	0	0	0	0	0	0	0	0	0	0	0	0	0	0	0	0	0	0	N	0	0	0	0	0	0	0	0	f	9	high	0	0	0	0
a0d9TR0706b	0	0	0	0	0	0	0	0	0	0	0	0	0	0	0	1	0	0	0	0	0	0	0	0	0	0	0	0	0	0	0	0	A	0	0	0	0	0	0	0	0	m	59	medium	0	0	0	0
a0dcTR0247a	1	0	0	0	0	0	0	0	0	0	0	0	0	0	0	0	0	0	0	0	0	0	0	0	0	0	0	0	0	0	0	0	N	0	0	1	0	0	1	0	1	m	56	high	2	0	0	1
a0dkTR0262a	0	0	0	0	0	0	0	0	0	0	0	0	0	0	0	0	0	0	0	1	0	1	1	1	0	1	0	1	0	1	0	1	N	0	0	0	0	0	0	0	0	f	65	low	3	0	0	0
a0dwTR0269a	0	0	0	0	0	0	0	0	0	0	1	0	0	0	0	0	0	0	0	0	0	0	1	0	0	1	0	0	0	0	0	0	N	0	0	1	0	0	0	0	0	f	46	high	0	0	0	0
a0e9TR9814a	0	0	0	0	0	0	0	0	0	0	0	0	0	0	0	0	0	0	0	0	0	0	0	1	0	0	0	0	0	0	0	0	A	0	0	0	0	1	0	0	0	f	66	high	0	0	0	1
a0eaTR0286a	1	0	0	0	0	0	0	0	0	0	0	0	0	0	0	0	0	0	0	0	0	0	0	0	0	0	0	0	0	0	0	0	A	0	0	0	0	0	0	0	0	f	52	high	0	0	0	0
a0ecTR0287a	0	0	0	0	0	0	0	0	0	0	0	0	0	1	0	0	0	0	0	0	0	0	0	0	0	0	0	0	0	0	0	0	N	0	0	0	0	1	0	0	0	m	66	high	1	0	0	0
a0efTR0291a	0	0	0	0	1	0	1	0	0	0	1	0	1	1	0	0	0	0	1	0	0	0	0	0	0	0	0	0	1	0	1	0	N	0	0	0	0	0	0	0	0	f	32	high	1	0	0	0
a0ejTR0293a	0	0	0	0	0	1	0	0	0	0	0	1	0	0	0	0	0	0	0	0	1	0	0	0	0	0	0	0	0	0	1	0	N	0	0	0	1	0	1	0	0	m	41	medium	3	0	0	1
a0emTR0295a	0	0	0	0	0	0	0	0	0	0	1	0	0	0	1	0	0	0	0	1	0	0	0	0	0	1	0	0	0	0	1	0	A	0	0	0	0	0	0	0	1	m	43	high	2	0	0	0
a0epTR0300a	1	0	0	0	0	0	0	0	0	0	0	0	0	0	0	0	0	0	0	0	0	0	0	0	0	0	0	0	0	0	0	0	N	0	0	0	0	0	0	0	0	f	61	medium	0	0	0	0
a0exTR0305a	0	0	0	0	0	0	0	0	0	0	0	0	0	0	0	1	0	0	0	0	1	0	0	0	0	0	0	0	0	0	0	0	A	0	0	0	1	0	0	0	0	f	66	high	1	0	0	0
a0fhTR0327a	1	0	0	0	0	0	0	0	0	0	0	0	0	0	0	0	0	0	0	0	0	0	0	0	0	0	0	0	0	0	0	0	N	0	1	0	0	0	0	0	0	m	37	medium	0	0	0	0
a0fkTR4942b	0	0	0	0	0	0	0	0	0	0	0	0	0	0	0	0	0	0	0	0	0	0	1	0	0	1	0	0	0	0	0	0	N	0	0	0	0	0	0	0	1	f	55	medium	1	0	0	1
a0fnTR0332a	1	0	0	0	0	0	0	0	0	0	0	0	0	0	0	0	0	0	0	0	0	0	0	0	0	0	0	0	0	0	0	0	N	0	0	0	1	0	0	0	0	m	64	medium	0	0	0	1
a0fxTR0341a	1	0	0	0	0	0	0	0	0	0	0	0	0	0	0	0	0	0	0	0	0	0	0	0	0	0	0	0	0	0	0	0	N	0	0	0	0	0	0	0	0	f	62	medium	0	0	0	0
a0h5TR9919a	0	0	0	1	0	1	0	1	0	0	0	0	1	0	0	0	0	0	1	0	0	0	0	0	0	0	0	0	0	0	1	0	A	0	0	0	0	0	0	0	0	f	84	high	0	0	0	1
a0h9TR0358a	1	0	0	0	0	0	0	0	0	0	0	0	0	0	0	0	0	0	0	0	0	0	0	0	0	0	0	0	0	0	0	0	A	0	0	0	0	0	0	1	0	m	83	low	0	0	0	0
a0hkTR0374a	0	0	0	0	1	0	1	1	0	0	0	0	1	1	1	0	0	0	1	1	0	0	0	0	0	0	0	0	0	0	1	0	A	0	0	0	0	0	0	0	0	f	41	high	0	0	0	1
a0hnTR0377a	1	0	0	0	0	0	0	0	0	0	0	0	0	0	0	0	0	0	0	0	0	0	0	0	0	0	0	0	0	0	0	0	N	0	0	0	0	0	0	0	0	m	64	high	1	0	0	1	1
a0j2TR0392a	0	0	0	0	0	0	0	0	0	0	0	0	0	0	0	0	0	0	0	0	0	0	0	0	0	0	0	0	0	0	1	0	N	0	0	0	0	0	0	0	0	m	39	high	0	1	2	1
a0j3TR0394a	0	0	0	0	0	0	0	0	0	0	0	0	0	0	0	0	0	0	0	0	0	0	0	0	0	0	0	0	1	0	0	0	N	0	0	0	0	0	0	0	0	m	48	high	0	0	0	0
a0j4TR0398a	0	0	0	0	1	0	0	0	0	0	0	0	1	0	0	0	0	0	0	0	0	0	0	0	0	0	0	0	1	0	1	0	N	0	0	0	1	0	0	0	1	m	36	high	0	0	0	0
a0j6TR0395a	1	0	0	0	0	0	0	0	0	0	0	0	0	0	0	0	0	0	0	0	0	0	0	0	0	0	0	0	0	0	0	0	N	0	0	0	0	0	0	0	0	m	43	high	0	0	0	1
a0jcTR0402a	1	0	0	0	0	0	0	0	0	0	0	0	0	0	0	0	0	0	0	0	0	0	0	0	0	0	0	0	0	0	0	0	N	0	0	0	0	0	0	0	1	f	61	medium	3	0	0	1
a0jdTR0404a	1	0	0	0	0	0	0	0	0	0	0	0	0	0	0	0	0	0	0	0	0	0	0	0	0	0	0	0	0	0	0	0	N	0	0	0	0	1	0	0	0	m	45	high	1	0	0	1
a0jeTR0405a	1	0	0	0	0	0	0	0	0	0	0	0	0	0	0	0	0	0	0	0	0	0	0	0	0	0	0	0	0	0	0	0	N	0	0	0	0	0	1	0	0	f	22	medium	0	0	0	0
a0jjTR0408a	0	0	0	0	0	0	0	0	0	0	0	0	0	0	0	0	0	0	0	1	0	1	1	0	0	0	0	0	0	0	0	0	N	0	0	0	0	0	0	0	1	f	59	medium	3	0	0	1
a0jkTR0410a	1	0	0	0	0	0	0	0	0	0	0	0	0	0	0	0	0	0	0	0	0	0	0	0	0	0	0	0	0	0	0	0	N	0	0	0	1	1	0	0	0	m	48	high	0	0	0	1
a0jnTR0413a	0	0	0	0	0	0	0	0	0	0	0	0	0	1	0	0	0	0	0	0	0	0	0	0	0	0	0	0	0	0	0	0	N	0	0	0	0	0	0	0	0	f	63	high	1	0	0	1
a0k7TR0426a	1	0	0	0	0	0	0	0	0	0	0	0	0	0	0	0	0	0	0	0	0	0	0	0	0	0	0	0	0	0	0	0	A	0	0	0	0	0	0	0	0	m	11	high	0	0	0	0
a0kfTR0441a	0	0	0	0	0	0	0	0	0	0	1	0	0	0	0	0	0	0	0	0	0	0	0	0	0	0	0	0	1	0	1	0	N	0	0	0	0	1	0	1	1	f	24	high	0	0	0	1
a0kkTR0444a	1	0	0	0	0	0	0	0	0	0	0	0	0	0	0	0	0	0	0	0	0	0	0	0	0	0	0	0	0	0	0	0	A	0	0	0	0	0	0	0	0	f	28	high	0	0	0	0
a0m3TR0459a	0	0	0	0	0	0	0	0	0	0	1	0	1	1	0	0	0	0	0	0	0	1	0	0	0	0	0	0	1	0	0	1	N	0	0	0	0	0	0	0	1	m	33	high	1	0	0	1
a0mcTR0480a	1	0	0	0	0	0	0	0	0	0	0	0	0	0	0	0	0	0	0	0	0	0	0	0	0	0	0	0	0	0	0	0	N	0	0	0	0	1	0	0	0	f	65	high	0	0	0	1
a0mxTR0482a	0	0	0	0	0	0	0	0	0	0	0	0	0	1	0	0	0	0	0	0	0	0	0	0	0	0	0	0	0	0	0	0	N	0	0	0	0	0	0	0	0	f	56	high	0	0	0	0
a0n6TR0503a	1	0	0	0	0	0	0	0	0	0	0	0	0	0	0	0	0	0	0	0	0	0	0	0	0	0	0	0	0	0	0	0	N	0	0	0	1	0	0	0	0	m	49	medium	0	0	0	0
a0n7TR0506a	0	0	0	1	0	0	0	0	0	0	0	0	0	0	0	0	0	0	1	0	0	0	0	0	0	0	0	0	0	0	0	0	N	0	0	0	0	0	0	0	0	f	40	high	0	0	0	0
a0ndTR0528a	0	0	0	0	0	0	0	0	0	0	1	0	0	0	0	0	0	0	0	0	0	0	0	0	0	0	0	0	0	0	0	0	A	0	0	0	0	0	0	0	0	m	8	high	0	0	0	0
a0nfTR0529a	1	0	0	0	0	0	0	0	0	0	0	0	0	0	0	0	0	0	0	0	0	0	0	0	0	0	0	0	0	0	0	0	N	0	0	0	0	0	0	0	0	f	65	high	0	0	0	1
a0nmTR0536a	0	0	0	0	0	0	0	0	0	0	0	0	0	0	0	0	0	0	0	0	0	0	0	0	1	0	0	0	0	0	0	0	N	0	0	0	0	0	0	0	0	m	44	high	1	0	0	0
a0p3TR0547a	1	0	0	0	0	0	0	0	0	0	0	0	0	0	0	0	0	0	0	0	0	0	0	0	0	0	0	0	0	0	0	0	N	1	0	0	0	0	0	0	0	m	65	medium	1	0	0	1
a0p4TR0549a	0	0	0	0	0	0	0	0	0	0	1	0	0	0	0	0	0	0	0	1	0	0	1	0	0	0	1	0	0	0	0	0	N	0	0	0	0	0	0	0	0	f	57	high	1	0	0	0
a0p5TR0551a	0	0	0	0	0	0	0	0	0	0	0	0	0	0	0	0	0	0	0	0	0	0	0	0	0	0	0	0	0	0	1	0	N	0	0	0	0	1	0	0	0	f	52	high	0	0	0	1
a0ptTR0581a	0	0	0	0	0	0	0	0	0	0	0	0	0	0	0	0	0	0	0	0	0	0	0	0	0	0	0	0	1	0	0	0	N	0	0	0	1	0	0	0	0	f	60	medium	0	0	0	0
a0r1TR0591a	1	0	0	0	0	0	0	0	0	0	0	0	0	0	0	0	0	0	0	0	0	0	0	0	0	0	0	0	0	0	0	0	A	0	0	0	0	1	0	0	0	f	53	high	1	0	0	0
a0r4TR0598a	0	0	0	0	0	0	0	0	0	0	0	0	0	0	0	0	0	0	0	1	0	0	0	0	0	0	0	0	0	0	0	0	N	0	0	0	0	0	1	0	0	f	58	high	1	0	0	1
a0raTR0612a	1	0	0	0	0	0	0	0	0	0	0	0	0	0	0	0	0	0	0	0	0	0	0	0	0	0	0	0	0	0	0	0	N	0	0	0	0	0	0	0	0	m	41	high	1	0	0	1
a0rcTR0609a	0	0	0	0	0	0	0	0	0	0	0	0	0	0	1	0	0	0	0	0	0	0	0	0	0	0	0	0	0	0	0	0	N	0	0	0	0	0	0	0	0	f	47	high	1	0	0	0
a0rdTR0606a	0	0	0	0	0	0	0	0	0	0	0	0	1	0	0	0	0	0	0	0	0	0	0	0	0	0	0	0	0	0	0	1	N	0	0	0	0	0	0	0	0	f	48	medium	1	0	0	1
a0rfTR0604a	0	0	0	0	0	0	0	0	0	0	1	0	1	0	0	0	0	0	1	0	0	0	0	0	0	0	0	1	0	0	0	0	N	0	0	0	0	1	0	0	0	f	11	high	1	0	0	0
a0t7TR0627a	0	0	0	0	0	0	0	0	0	0	1	0	1	0	0	0	0	0	1	0	0	0	0	1	0	0	0	0	0	0	0	0	N	0	0	0	1	0	0	0	0	f	11	high	0	0	0	1
a0taTR0633a	0	0	0	0	0	0	0	0	0	0	0	0	0	0	0	0	0	0	0	0	0	0	0	0	0	0	0	0	0	0	1	0	N	0	0	0	0	0	0	0	0	m	14	high	0	0	0	0
a0tmTR0645a	0	0	0	1	0	0	0	1	0	0	1	0	1	0	0	1	1	0	1	1	1	0	1	1	0	1	0	0	1	0	1	0	N	0	0	0	1	0	0	0	0	m	67	high	0	0	0	1
a0w9TR0665a	0	0	0	1	0	1	0	1	0	0	1	0	1	1	1	1	0	0	0	0	0	0	0	0	0	0	0	0	0	0	1	0	N	0	0	0	0	0	0	0	0	m	36	medium	1	0	0	0
a0wjTR0678a	1	0	0	0	0	0	0	0	0	0	0	0	0	0	0	0	0	0	0	0	0	0	0	0	0	0	0	0	0	0	0	0	A	0	0	0	0	0	0	0	0	f	38	medium	2	0	0	1
a0wnTR0682a	0	0	0	0	0	0	0	0	0	0	0	0	0	0	0	0	0	0	0	0	1	0	1	0	0	0	0	0	0	0	0	0	A	0	0	0	1	0	1	0	1	m	57	medium	4	0	0	1
a0x7TR0695a	0	0	0	0	0	0	0	0	0	0	1	0	1	0	0	0	0	0	0	0	0	0	0	0	0	0	0	0	0	0	0	0	N	0	0	0	1	0	0	0	0	m	8	high	0	0	0	0
a0xhTR0704a	0	0	0	0	0	0	1	0	0	0	0	0	0	1	0	0	0	0	0	0	0	0	0	0	0	0	0	0	1	1	1	0	N	0	1	0	0	0	0	0	0	m	54	medium	0	0	0	0
a0xnTR0711a	1	0	0	0	0	0	0	0	0	0	0	0	0	0	0	0	0	0	0	0	0	0	0	0	0	0	0	0	0	0	0	0	N	0	0	0	0	0	0	0	0	f	55	high	0	0	0	0
a0xpTR0713a	1	0	0	0	0	0	0	0	0	0	0	0	0	0	0	0	0	0	0	0	0	0	0	0	0	0	0	0	0	0	0	0	N	0	0	0	0	0	0	0	0	f	57	medium	3	0	0	1
a0xxTR0720a	1	0	0	0	0	0	0	0	0	0	0	0	0	0	0	0	0	0	0	0	0	0	0	0	0	0	0	0	0	0	0	0	N	0	0	0	0	0	0	0	0	f	30	high	0	0	0	0
a104TR0724a	1	0	0	0	0	0	0	0	0	0	0	0	0	0	0	0	0	0	0	0	0	0	0	0	0	0	0	0	0	0	0	0	N	0	0	0	0	0	0	0	0	m	47	high	0	0	0	1
a105TR0725a	0	0	0	0	0	0	0	0	0	0	0	0	0	0	0	1	0	0	0	0	0	0	0	0	0	0	0	0	0	0	0	0	A	0	0	0	0	0	0	0	0	f	51	high	0	0	0	0
a107TR0726a	1	0	0	0	0	0	0	0	0	0	0	0	0	0	0	0	0	0	0	0	0	0	0	0	0	0	0	0	0	0	0	0	N	0	0	0	0	0	1	0	0	m	17	medium	2	0	0	1
a10mTR0741a	0	0	0	0	0	0	0	0	0	0	1	0	1	0	0	0	0	0	0	1	0	0	0	0	0	0	1	0	0	0	0	0	N	0	0	0	0	1	0	0	0	m	59	high	3	0	0	1
a10xTR0749a	0	0	0	0	0	0	0	0	0	0	0	0	0	0	0	0	0	0	0	0	0	0	0	0	0	0	0	0	0	0	0	0	N	0	0	0	0	0	0	0	0	m	38	low	1	0	0	0
a111TR0752a	0	0	0	0	0	0	0	1	0	1	1	0	1	1	1	0	0	0	0	0	0	0	1	0	0	0	0	0	0	0	0	0	N	0	0	0	1	0	0	0	0	f	53	medium	3	0	0	1
a116TR0760a	1	0	0	0	0	0	0	0	0	0	0	0	0	0	0	0	0	0	0	0	0	0	0	0	0	0	0	0	0	0	0	0	N	0	0	0	1	0	0	0	0	m	65	medium	0	0	0	0
a119TR0763a	0	0	0	0	0	0	0	0	0	0	0	0	0	0	0	0	0	0	0	0	0	0	0	0	0	0	0	0	0	0	0	0	N	0	0	0	0	1	0	0	0	m	68	high	0	0	0	0
a11aTR0764a	1	0	0	0	0	0	0	0	0	0	0	0	0	0	0	0	0	0	0	0	0	0	0	0	0	0	0	0	0	0	0	0	N	0	0	0	1	0	0	0	0	m	41	high	0	0	0	1
a11cTR0767a	1	0	0	0	0	0	0	0	0	0	0	0	0	0	0	0	0	0	0	0	0	0	0	0	0	0	0	0	0	0	0	0	N	0	0	0	0	1	0	0	0	f	57	high	0	0	0	0
a121TR0782a	1	0	0	0	0	0	0	0	0	0	0	0	0	0	0	0	0	0	0	0	0	0	0	0	0	0	0	0	0	0	0	0	N	0	0	0	0	0	0	0	0	f	11	medium	0	0	0	0
a123TR0784a	0	0	0	0	0	0	0	0	0	0	0	0	0	0	0	0	0	0	0	0	0	1	1	0	0	1	0	0	0	0	0	0	N	0	0	0	1	0	0	0	0	f	21	medium	0	0	0	1
a128TR0791a	1	0	0	0	0	0	0	0	0	0	0	0	0	0	0	0	0	0	0	0	0	0	0	0	0	0	0	0	0	0	0	0	N	0	0	0	1	0	0	0	0	m	60	medium	0	0	0	0
a12eTR0794a	1	0	0	0	0	0	0	0	0	0	0	0	0	0	0	0	0	0	0	0	0	0	0	0	0	0	0	0	0	0	0	0	N	0	0	0	0	0	0	0	0	m	10	medium	0	0	0	0
a12nTR0802a	0	0	0	0	0	0	0	0	0	0	1	0	0	0	0	0	0	0	0	0	0	1	0	0	0	0	0	0	0	0	0	0	N	0	0	0	0	1	1	0	1	f	49	high	0	0	0	0
a132TR0813a	0	0	0	0	0	0	0	0	0	0	1	0	1	1	0	1	0	0	1	0	0	0	0	0	0	1	0	0	0	0	1	0	N	0	0	0	0	1	0	0	0	m	46	high	0	0	0	1
a13hTR0829a	0	0	0	0	0	0	1	0	0	0	0	0	0	0	0	0	0	0	0	0	0	0	0	0	0	0	0	0	0	0	0	0	N	0	0	0	0	0	0	0	0	f	64	high	0	0	0	1
a13kTR0837a	1	0	0	0	0	0	0	0	0	0	0	0	0	0	0	0	0	0	0	0	0	0	0	0	0	0	0	0	0	0	0	0	N	0	0	0	0	1	0	1	1	m	48	high	1	0	0	0
a13mTR0834a	0	0	0	0	0	0	0	0	0	0	0	0	1	0	0	0	0	0	0	0	0	0	0	0	0	0	0	0	0	0	0	0	N	0	0	0	1	0	0	0	0	f	43	medium	0	0	0	1
a13nTR6828a	0	0	0	0	0	0	0	0	0	0	1	0	0	0	0	1	0	0	0	0	0	0	0	0	0	0	0	0	0	0	0	0	A	0	0	0	0	0	0	0	0	m	57	high	0	0	0	0
a13pTR0838a	0	0	0	0	0	0	0	0	0	0	0	0	0	0	1	0	0	1	0	1	0	0	0	0	0	0	0	0	0	0	0	0	N	0	0	0	0	0	0	0	0	m	54	high	1	0	0	0
a13rTR0840a	1	0	0	0	0	0	0	0	0	0	0	0	0	0	0	0	0	0	0	0	0	0	0	0	0	0	0	0	0	0	0	0	N	0	0	0	0	1	0	0	0	f	44	medium	1	0	0	1
a13xTR0845a	1	0	0	0	0	0	0	0	0	0	0	0	0	0	0	0	0	0	0	0	0	0	0	0	0	0	0	0	0	0	0	0	A	0	0	0	0	1	0	0	0	m	66	high	0	0	0	1
a142TR0849a	1	0	0	0	0	0	0	0	0	0	0	0	0	0	0	0	0	0	0	0	0	0	0	0	0	0	0	0	0	0	0	0	A	1	0	0	1	0	0	0	0	m	67	low	0	0	0	1
a143TR0848a	0	0	0	0	0	0	0	1	0	0	1	0	0	0	0	0	0	0	1	1	0	0	0	0	0	0	0	0	0	0	0	0	A	0	0	1	1	0	1	0	0	f	28	high	1	0	0	0
a148TR0854a	1	0	0	0	0	0	0	0	0	0	0	0	0	0	0	0	0	0	0	0	0	0	0	0	0	0	0	0	0	0	0	0	N	0	0	0	0	1	0	0	0	m	72	high	1	0	0	1
a14dTR0858a	1	0	0	0	0	0	0	0	0	0	0	0	0	0	0	0	0	0	0	0	0	0	0	0	0	0	0	0	0	0	0	0	N	0	0	0	1	0	0	0	0	f	52	high	1	0	0	0
a14fTR0862a	1	0	0	0	0	0	0	0	0	0	0	0	0	0	0	0	0	0	0	0	0	0	0	0	0	0	0	0	0	0	0	0	A	0	0	0	0	0	0	1	0	f	61	low	2	0	0	0
a14nTR0866a	0	0	0	0	0	0	0	0	0	0	1	0	0	0	0	0	0	0	0	0	0	0	0	0	0	0	0	0	0	0	0	0	N	0	0	0	0	0	0	0	1	m	64	medium	2	0	0	0
a14pTR0869a	1	0	0	0	0	0	0	0	0	0	0	0	0	0	0	0	0	0	0	0	0	0	0	0	0	0	0	0	0	0	0	0	N	1	0	0	0	0	0	0	0	m	74	low	0	0	0	0
a14xTR0874a	0	0	0	0	0	0	0	0	0	0	1	0	0	0	0	0	0	0	0	0	0	0	0	0	0	0	0	0	0	0	0	0	N	0	0	0	1	0	0	0	0	m	65	high	0	1	0	1
a150TR0875a	1	0	0	0	0	0	0	0	0	0	0	0	0	0	0	0	0	0	0	0	0	0	0	0	0	0	0	0	0	0	0	0	A	0	0	0	0	1	1	1	1	m	18	medium	0	0	0	1
a15cTR0885a	0	0	0	0	0	0	0	0	0	0	0	0	0	0	0	0	0	0	0	0	0	0	0	0	0	0	0	0	0	0	1	0	N	0	0	0	0	0	0	0	1	m	40	high	0	0	0	1
a15nTR0894a	1	0	0	0	0	0	0	0	0	0	0	0	0	0	0	0	0	0	0	0	0	0	0	0	0	0	0	0	0	0	0	0	A	0	0	0	0	0	0	0	0	f	52	medium	0	0	0	0
a15pTR0897a	0	0	1	0	0	1	0	0	0	0	0	1	1	0	0	0	0	0	0	0	0	0	0	0	1	0	0	0	0	0	1	0	A	0	0	0	1	0	0	0	1	m	55	low	4	0	0	1
a15wTR0902a	0	0	0	0	0	0	0	0	0	0	1	0	0	0	0	1	0	0	0	0	0	0	0	0	0	1	0	0	0	0	0	0	N	0	0	0	0	1	0	0	0	m	64	medium	0	1	1	0
a16kTR0937a	1	0	0	0	0	0	0	0	0	0	0	0	0	0	0	0	0	0	0	0	0	0	0	0	0	0	0	0	0	0	0	0	N	0	0	0	1	0	0	0	0	f	72	high	0	0	0	1
a16mTR0938a	1	0	0	0	0	0	0	0	0	0	0	0	0	0	0	0	0	0	0	0	0	0	0	0	0	0	0	0	0	0	0	0	A	0	0	0	1	1	0	0	0	f	51	high	0	0	0	0
a16pTR0940a	1	0	0	0	0	0	0	0	0	0	0	0	0	0	0	0	0	0	0	0	0	0	0	0	0	0	0	0	0	0	0	0	N	0	0	0	1	0	0	0	0	m	64	high	0	0	0	1
a172TR0963a	1	0	0	0	0	0	0	0	0	0	0	0	0	0	0	0	0	0	0	0	0	0	0	0	0	0	0	0	0	0	0	0	N	0	0	0	1	0	0	0	0	m	62	high	0	0	0	0
a180TR0984a	1	0	0	0	0	0	0	0	0	0	0	0	0	0	0	0	0	0	0	0	0	0	0	0	0	0	0	0	0	0	0	0	N	0	0	0	1	1	0	0	0	f	80	low	0	0	0	1	1
a182TR0986a	0	0	0	0	0	0	0	0	0	0	0	0	0	0	0	0	0	0	0	0	0	0	0	0	0	0	0	0	0	1	1	0	N	0	0	0	0	0	0	0	0	m	12	high	0	0	0	0
a185TR0993a	1	0	0	0	0	0	0	0	0	0	0	0	0	0	0	0	0	0	0	0	0	0	0	0	0	0	0	0	0	0	0	0	N	0	0	0	1	1	0	0	0	m	49	medium	0	0	0	1
a18eTR1004a	1	0	0	0	0	0	0	0	0	0	0	0	0	0	0	0	0	0	0	0	0	0	0	0	0	0	0	0	0	0	0	0	N	0	0	0	0	0	0	0	0	f	51	high	0	0	0	0
a18mTR1010a	1	0	0	0	0	0	0	0	0	0	0	0	0	0	0	0	0	0	0	0	0	0	0	0	0	0	0	0	0	0	0	0	N	0	0	0	1	1	0	0	0	f	59	medium	1	0	0	0
a18pTR1012a	1	0	0	0	0	0	0	0	0	0	0	0	0	0	0	0	0	0	0	0	0	0	0	0	0	0	0	0	0	0	0	0	N	0	0	0	1	0	0	0	1	m	52	medium	0	0	0	1
a18rTR1013a	0	0	1	1	0	1	0	0	0	0	0	0	0	0	0	0	1	0	0	0	0	0	0	0	1	0	0	1	0	1	1	0	N	0	0	0	1	0	1	0	0	f	55	medium	1	1	0	0
a190TR1018a	0	0	0	0	0	1	0	0	0	0	0	0	0	0	0	0	0	0	0	0	0	0	0	1	0	0	0	1	0	0	0	0	N	0	0	0	1	0	0	1	0	f	52	medium	1	0	0	0
a191TR1019a	1	0	0	0	0	0	0	0	0	0	0	0	0	0	0	0	0	0	0	0	0	0	0	0	0	0	0	0	0	0	0	0	N	0	0	0	0	0	0	0	0	m	60	medium	0	0	0	1
a195TR1025a	0	0	0	0	0	0	0	0	0	0	0	0	0	0	0	0	0	0	0	0	0	0	0	0	0	1	0	0	0	0	1	0	N	0	0	0	1	0	0	0	1	f	59	medium	0	0	0	1
a19kTR1039a	0	0	0	0	0	0	0	0	0	0	0	0	0	0	0	0	0	0	0	0	0	0	0	1	0	0	0	0	0	0	1	0	A	0	0	0	1	0	0	0	0	m	58	high	3	0	0	1
a1a9TR1060a	1	0	0	0	0	0	0	0	0	0	0	0	0	0	0	0	0	0	0	0	0	0	0	0	0	0	0	0	0	0	0	0	A	0	0	0	0	1	0	0	0	m	9	high	0	0	0	0
a1axTR1087a	1	0	0	0	0	0	0	0	0	0	0	0	0	0	0	0	0	0	0	0	0	0	0	0	0	0	0	0	0	0	0	0	N	0	0	0	0	0	0	0	0	f	36	high	1	0	0	0
a1c1TR1090a	1	0	0	0	0	0	0	0	0	0	0	0	0	0	0	0	0	0	0	0	0	0	0	0	0	0	0	0	0	0	0	0	N	0	0	0	0	1	0	0	0	m	74	high	1	0	0	1
a1c2TR1173a	1	0	0	0	0	0	0	0	0	0	0	0	0	0	0	0	0	0	0	0	0	0	0	0	0	0	0	0	0	0	0	0	A	0	0	0	0	0	0	0	0	m	46	medium	0	0	0	0
a1c8TR1108a	0	0	0	0	0	0	0	1	0	0	0	0	0	0	0	1	1	0	0	0	0	0	1	1	0	1	0	0	1	1	1	0	N	0	0	0	0	0	0	0	1	f	39	high	1	0	0	0
a1cjTR1115a	1	0	0	0	0	0	0	0	0	0	0	0	0	0	0	0	0	0	0	0	0	0	0	0	0	0	0	0	0	0	0	0	N	0	0	0	0	0	0	0	0	m	46	high	0	0	0	0
a1d2TR1125a	0	0	0	0	0	0	0	0	0	0	0	0	0	0	1	0	0	0	0	0	0	0	0	1	1	0	0	0	0	0	1	0	A	0	0	0	0	0	0	0	0	m	49	medium	2	0	0	1
a1d4TR1131a	1	0	0	0	0	0	0	0	0	0	0	0	0	0	0	0	0	0	0	0	0	0	0	0	0	0	0	0	0	0	0	0	N	0	0	0	0	0	0	0	0	f	55	high	0	0	0	0
a1d7TR1132a	1	0	0	0	0	0	0	0	0	0	0	0	0	0	0	0	0	0	0	0	0	0	0	0	0	0	0	0	0	0	0	0	N	0	0	0	0	1	0	0	0	f	55	medium	2	0	0	0
a1dcTR1138a	0	0	0	0	0	0	0	0	0	0	0	0	0	0	0	0	0	0	0	0	0	0	0	0	0	0	0	0	1	0	0	0	A	0	0	0	0	0	0	0	1	f	30	medium	0	0	0	0
a1ddTR1143a	0	0	0	0	0	0	0	0	0	0	0	0	0	0	0	0	0	0	0	0	0	0	0	0	0	0	0	0	0	0	0	0	A	0	0	0	0	0	0	0	1	m	62	medium	1	0	0	0
a1deTR1141a	0	1	0	1	0	1	0	0	0	0	0	0	0	0	1	0	1	0	0	0	0	0	1	0	0	0	0	0	0	0	1	1	N	0	0	0	0	0	0	0	0	m	61	high	1	1	1	1
a1dxTR1156a	1	0	0	0	0	0	0	0	0	0	0	0	0	0	0	0	0	0	0	0	0	0	0	0	0	0	0	0	0	0	0	0	N	0	0	0	0	0	0	0	0	f	77	low	2	0	0	0
a1ekTR1182a	1	0	0	0	0	0	0	0	0	0	0	0	0	0	0	0	0	0	0	0	0	0	0	0	0	0	0	0	0	0	0	0	N	0	0	0	0	0	0	0	0	f	55	medium	0	0	0	1
a1f9TR1209a	0	0	0	0	0	0	0	0	0	0	0	0	0	0	1	0	0	0	0	0	0	0	0	0	0	0	0	0	0	0	0	0	A	0	0	0	0	0	0	0	0	f	38	high	0	0	0	1
a1haTR1242a	1	0	0	0	0	0	0	0	0	0	0	0	0	0	0	0	0	0	0	0	0	0	0	0	0	0	0	0	0	0	0	0	A	0	0	0	0	0	0	0	0	m	79	high	0	0	0	0
a1hdTR1245a	0	0	0	0	0	0	0	0	0	0	0	0	0	0	0	0	0	0	0	0	0	0	0	0	0	0	0	0	0	0	1	0	N	0	0	0	0	0	0	0	0	f	43	high	0	0	0	0
a1hkTR1247a	1	0	0	0	0	0	0	0	0	0	0	0	0	0	0	0	0	0	0	0	0	0	0	0	0	0	0	0	0	0	0	0	A	0	0	0	0	0	1	0	0	f	56	medium	1	0	0	1
a1hrTR1255a	1	0	0	0	0	0	0	0	0	0	0	0	0	0	0	0	0	0	0	0	0	0	0	0	0	0	0	0	0	0	0	0	N	0	0	0	0	0	0	0	1	m	36	high	1	0	0	1
a1hxTR1260a	0	0	0	0	0	0	0	0	0	0	0	0	1	0	0	1	0	0	0	0	0	0	0	0	1	0	0	0	0	0	0	0	N	0	0	0	1	0	1	0	1	m	37	medium	1	0	0	0
a1j5TR1262a	1	0	0	0	0	0	0	0	0	0	0	0	0	0	0	0	0	0	0	0	0	0	0	0	0	0	0	0	0	0	0	0	A	0	0	0	0	0	0	0	1	m	60	high	0	0	0	0
a1j9TR1268a	1	0	0	0	0	0	0	0	0	0	0	0	0	0	0	0	0	0	0	0	0	0	0	0	0	0	0	0	0	0	0	0	N	0	1	0	0	1	0	1	1	f	34	medium	0	0	0	1
a1jeTR1274a	0	0	0	0	0	0	0	0	0	0	0	0	0	0	0	0	0	0	0	0	0	0	0	1	0	0	0	0	0	0	0	0	N	0	0	0	0	1	0	0	1	m	53	medium	1	0	0	1
a1jhTR1282a	1	0	0	0	0	0	0	0	0	0	0	0	0	0	0	0	0	0	0	0	0	0	0	0	0	0	0	0	0	0	0	0	N	0	0	0	0	0	0	0	0	f	55	high	0	0	0	0
a1jrTR1287a	1	0	0	0	0	0	0	0	0	0	0	0	0	0	0	0	0	0	0	0	0	0	0	0	0	0	0	0	0	0	0	0	N	0	0	0	1	0	0	0	0	m	39	medium	2	0	0	1
a1k9TR1303a	1	0	0	0	0	0	0	0	0	0	0	0	0	0	0	0	0	0	0	0	0	0	0	0	0	0	0	0	0	0	0	0	N	0	0	0	0	0	0	0	1	m	10	low	0	0	0	1
a1knTR1319a	1	0	0	0	0	0	0	0	0	0	0	0	0	0	0	0	0	0	0	0	0	0	0	0	0	0	0	0	0	0	0	0	N	0	0	1	0	1	0	1	1	m	62	high	0	1	1	0
a1kpTR1318a	1	0	0	0	0	0	0	0	0	0	0	0	0	0	0	0	0	0	0	0	0	0	0	0	0	0	0	0	0	0	0	0	N	0	0	0	0	1	0	0	0	m	42	high	2	0	0	1
a1krTR1320a	0	0	0	0	0	1	1	0	0	0	1	0	1	0	0	0	0	0	0	0	0	1	0	1	1	0	0	0	0	0	1	0	A	0	0	0	0	0	0	0	0	m	47	high	2	0	0	0
a1m2TR1329a	1	0	0	0	0	0	0	0	0	0	0	0	0	0	0	0	0	0	0	0	0	0	0	0	0	0	0	0	0	0	0	0	N	0	0	0	1	0	1	0	0	m	13	high	0	0	0	0
a1m4TR1328a	0	0	0	0	0	0	1	0	0	0	0	0	1	0	0	0	0	0	0	0	0	1	0	0	0	0	0	0	0	0	0	0	N	0	0	0	0	1	0	0	0	m	49	high	0	0	0	0
a1n4TR1362a	0	0	0	0	0	0	1	0	0	0	0	1	0	0	1	0	0	0	1	1	1	0	1	0	0	0	1	0	0	1	0	0	N	0	0	0	0	0	0	0	0	m	60	high	1	1	0	1
a1n7TR1366a	0	0	0	0	0	0	0	0	0	0	0	0	0	0	0	0	0	0	0	0	0	0	0	1	0	0	0	0	0	0	0	0	N	0	0	0	0	1	0	0	0	f	15	high	0	0	0	1
a1p0TR1394a	1	0	0	0	0	0	0	0	0	0	0	0	0	0	0	0	0	0	0	0	0	0	0	0	0	0	0	0	0	0	0	0	A	0	0	0	1	0	1	0	0	m	68	high	1	0	0	1
a1p9TR1423a	1	0	0	0	0	0	0	0	0	0	0	0	0	0	0	0	0	0	0	0	0	0	0	0	0	0	0	0	0	0	0	0	N	0	0	0	0	0	0	0	0	f	39	high	1	0	0	1
a1pfTR1415a	1	0	0	0	0	0	0	0	0	0	0	0	0	0	0	0	0	0	0	0	0	0	0	0	0	0	0	0	0	0	0	0	N	0	0	0	1	0	0	0	0	m	53	high	0	0	0	0
a1phTR1416a	0	0	0	0	0	0	0	0	0	0	0	0	0	0	0	0	0	0	0	0	0	0	0	0	0	0	0	0	0	0	1	0	A	1	0	0	0	1	0	0	0	m	35	high	1	0	0	1
a1ppTR1424a	1	0	0	0	0	0	0	0	0	0	0	0	0	0	0	0	0	0	0	0	0	0	0	0	0	0	0	0	0	0	0	0	N	0	0	0	0	0	0	0	0	f	68	medium	3	0	0	0
a1ptTR1427a	0	0	0	1	0	0	0	1	0	0	1	0	1	0	1	1	0	0	1	0	0	1	1	1	0	1	0	1	1	1	1	0	N	0	0	0	0	0	0	0	0	f	22	medium	0	0	0	1
a1rkTR1455a	0	0	0	0	0	0	0	0	0	0	0	0	0	0	0	0	0	0	0	0	0	0	0	0	0	0	0	0	1	0	0	0	A	0	0	0	1	0	0	0	0	m	61	high	1	0	0	1
a1t2TR1467a	1	0	0	0	0	0	0	0	0	0	0	0	0	0	0	0	0	0	0	0	0	0	0	0	0	0	0	0	0	0	0	0	N	0	0	0	0	0	0	0	0	f	13	high	0	0	0	0
a1tcTR1480a	1	0	0	0	0	0	0	0	0	0	0	0	0	0	0	0	0	0	0	0	0	0	0	0	0	0	0	0	0	0	0	0	A	0	0	0	0	0	0	0	0	f	10	medium	0	0	0	0
a1teTR1481a	0	0	0	0	0	0	0	0	0	0	0	0	0	1	0	0	0	0	0	0	0	0	0	0	0	0	0	0	0	0	1	0	A	0	0	0	0	1	0	0	0	m	49	low	6	0	0	1
a1w0TR1490a	0	0	0	0	0	0	0	0	0	0	0	0	0	0	0	0	0	0	0	0	0	0	0	0	0	0	0	0	0	0	0	0	A	0	0	0	0	0	0	0	1	f	57	medium	0	0	0	0
a1w5TR1500a	1	0	0	0	0	0	0	0	0	0	0	0	0	0	0	0	0	0	0	0	0	0	0	0	0	0	0	0	0	0	0	0	A	0	0	0	0	1	1	1	1	m	73	high	2	0	0	0
a1w7TR1506a	1	0	0	0	0	0	0	0	0	0	0	0	0	0	0	0	0	0	0	0	0	0	0	0	0	0	0	0	0	0	0	0	N	0	0	0	0	1	0	0	0	m	64	medium	0	0	0	1
a1w8TR1507a	1	0	0	0	0	0	0	0	0	0	0	0	0	0	0	0	0	0	0	0	0	0	0	0	0	0	0	0	0	0	0	0	N	0	0	0	1	1	0	0	1	f	63	high	0	0	0	1
a1wfTR1515a	1	0	0	0	0	0	0	0	0	0	0	0	0	0	0	0	0	0	0	0	0	0	0	0	0	0	0	0	0	0	0	0	A	0	0	0	1	0	0	0	0	m	46	high	0	0	0	1
a1wrTR1525a	0	0	0	0	1	0	1	0	1	0	0	0	0	0	0	0	0	0	0	0	0	0	0	0	0	0	0	0	0	0	0	0	N	0	0	0	0	1	0	0	0	f	25	medium	1	1	0	1
a1xaTR1542a	0	0	0	0	0	0	1	0	0	0	0	0	0	0	0	0	0	0	0	0	0	0	0	0	0	0	0	0	0	0	0	0	A	0	0	0	0	0	0	0	0	f	39	high	1	1	1	1
a1xcTR1543a	0	0	0	0	0	0	0	0	0	0	0	0	0	0	0	0	0	0	0	0	0	0	0	1	0	0	0	0	0	0	0	0	A	0	0	0	1	0	0	0	1	f	55	high	0	0	0	1
a1xdTR1545a	1	0	0	0	0	0	0	0	0	0	0	0	0	0	0	0	0	0	0	0	0	0	0	0	0	0	0	0	0	0	0	0	A	0	0	0	1	0	0	0	0	m	43	high	1	0	0	1
a1xfTR1546a	0	0	0	0	1	0	1	0	0	0	0	0	0	0	0	0	0	0	0	0	0	0	0	0	0	0	0	0	0	1	1	0	N	0	0	0	0	0	0	0	1	f	58	high	1	0	0	1
a1xjTR1548a	1	0	0	0	0	0	0	0	0	0	0	0	0	0	0	0	0	0	0	0	0	0	0	0	0	0	0	0	0	0	0	0	N	0	0	0	1	0	0	0	0	m	58	high	0	0	0	0
a200TR1562a	0	0	0	0	0	1	1	0	0	0	1	0	1	0	1	0	0	0	0	0	0	0	0	0	0	0	0	1	0	0	1	0	N	0	0	0	1	0	0	0	1	f	22	medium	0	1	0	1
a203TR1564a	0	0	0	1	0	0	0	0	0	0	1	1	0	0	0	1	0	0	0	0	0	0	0	0	0	0	0	0	0	0	0	0	N	0	0	0	1	0	0	0	0	m	66	high	4	0	0	1
a20kTR1588a	0	0	0	0	0	0	0	0	0	0	0	0	1	0	0	0	0	0	0	0	0	0	0	0	0	0	0	0	0	0	1	0	N	0	0	0	0	0	0	0	0	f	28	high	2	0	0	1
a212TR1597a	0	0	0	0	0	0	1	0	0	0	1	0	0	0	0	0	0	0	0	0	0	0	0	0	0	0	0	0	0	0	0	0	N	0	0	0	0	0	0	0	0	f	30	high	0	0	0	1
a214TR1614a	1	0	0	0	0	0	0	0	0	0	0	0	0	0	0	0	0	0	0	0	0	0	0	0	0	0	0	0	0	0	0	0	N	0	0	0	1	0	0	0	0	f	49	medium	0	0	0	0
a21aTR1604a	1	0	0	0	0	0	0	0	0	0	0	0	0	0	0	0	0	0	0	0	0	0	0	0	0	0	0	0	0	0	0	0	N	0	0	0	1	0	0	0	0	f	10	high	0	0	0	1
a21eTR1609a	0	0	0	0	0	0	0	0	0	0	0	0	1	0	0	0	0	0	0	0	0	0	0	1	0	0	0	0	1	0	0	0	A	0	0	0	1	0	0	0	0	f	33	high	0	0	0	1
a221TR1630a	1	0	0	0	0	0	0	0	0	0	0	0	0	0	0	0	0	0	0	0	0	0	0	0	0	0	0	0	0	0	0	0	N	0	0	0	0	1	0	0	0	f	34	high	1	0	0	1
a22aTR1646a	1	0	0	0	0	0	0	0	0	0	0	0	0	0	0	0	0	0	0	0	0	0	0	0	0	0	0	0	0	0	0	0	A	0	0	0	0	1	0	0	0	m	10	high	0	0	0	1
a22hTR1661a	1	0	0	0	0	0	0	0	0	0	0	0	0	0	0	0	0	0	0	0	0	0	0	0	0	0	0	0	0	0	0	0	A	0	0	0	0	0	0	0	1	m	33	high	1	0	0	1
a22pTR3332a	1	0	0	0	0	0	0	0	0	0	0	0	0	0	0	0	0	0	0	0	0	0	0	0	0	0	0	0	0	0	0	0	N	0	0	0	0	1	0	0	1	f	39	high	0	0	0	0
a230TR1668a	0	0	0	0	0	0	0	0	0	0	0	0	1	0	0	0	0	0	0	0	0	1	0	0	0	0	0	0	0	0	0	0	N	0	0	0	0	0	0	1	0	m	42	high	1	0	0	1
a231TR1669a	1	0	0	0	0	0	0	0	0	0	0	0	0	0	0	0	0	0	0	0	0	0	0	0	0	0	0	0	0	0	0	0	N	0	0	0	0	0	0	0	1	m	11	high	0	0	0	0
a233TR1671a	1	0	0	0	0	0	0	0	0	0	0	0	0	0	0	0	0	0	0	0	0	0	0	0	0	0	0	0	0	0	0	0	A	0	0	0	1	0	0	0	1	m	11	high	0	0	0	1
a239TR1676a	0	0	0	0	0	0	0	0	0	0	1	0	0	0	0	0	0	0	0	0	0	0	0	0	0	0	0	0	0	0	1	0	N	0	0	0	1	1	0	0	0	m	29	high	0	0	0	1
a23hTR1684a	0	0	0	0	0	1	1	0	0	0	0	0	1	0	0	0	0	0	0	0	0	0	0	1	0	0	0	0	1	0	1	0	N	0	0	0	1	0	1	0	0	f	36	high	1	0	0	0
a24mTR1715a	1	0	0	0	0	0	0	0	0	0	0	0	0	0	0	0	0	0	0	0	0	0	0	0	0	0	0	0	0	0	0	0	A	0	0	0	1	0	0	0	0	f	81	high	3	0	0	1
a24pTR1720a	1	0	0	0	0	0	0	0	0	0	0	0	0	0	0	0	0	0	0	0	0	0	0	0	0	0	0	0	0	0	0	0	N	0	0	0	1	0	0	0	0	m	71	high	0	0	0	1
a257TR1731a	1	0	0	0	0	0	0	0	0	0	0	0	0	0	0	0	0	0	0	0	0	0	0	0	0	0	0	0	0	0	0	0	A	0	0	0	0	1	0	0	1	f	54	low	1	0	0	1
a258TR1730a	0	0	0	0	0	0	0	0	0	0	0	0	0	0	0	0	0	0	0	0	0	0	0	0	0	0	0	0	0	0	1	0	N	0	0	1	1	1	0	0	0	f	43	medium	0	0	0	1
a259TR1733a	1	0	0	0	0	0	0	0	0	0	0	0	0	0	0	0	0	0	0	0	0	0	0	0	0	0	0	0	0	0	0	0	N	0	0	0	0	0	0	0	0	m	52	medium	0	0	0	1
a25cTR1735a	0	0	0	0	0	0	0	0	0	0	0	0	0	0	0	0	0	0	0	0	0	0	0	1	0	0	0	0	0	0	0	0	N	0	0	0	0	0	0	0	0	m	70	high	0	0	0	1
a25wTR1748a	1	0	0	0	0	0	0	0	0	0	0	0	0	0	0	0	0	0	0	0	0	0	0	0	0	0	0	0	0	0	0	0	N	0	0	0	0	1	0	0	0	f	47	high	0	0	0	1
a267TR1759a	1	0	0	0	0	0	0	0	0	0	0	0	0	0	0	0	0	0	0	0	0	0	0	0	0	0	0	0	0	0	0	0	N	0	0	0	1	1	0	0	1	f	51	high	0	0	0	0
a26fTR1777a	1	0	0	0	0	0	0	0	0	0	0	0	0	0	0	0	0	0	0	0	0	0	0	0	0	0	0	0	0	0	0	0	N	0	0	0	0	1	0	0	0	m	41	high	3	0	0	1
a26hTR1772a	0	0	0	0	0	0	0	0	0	0	0	0	0	0	0	0	0	0	0	0	0	0	0	0	0	0	0	0	0	0	1	0	N	0	0	0	0	0	0	1	0	f	81	medium	2	0	0	1
a26jTR1774a	0	0	0	0	0	1	0	0	0	0	0	0	1	0	0	0	0	0	0	0	0	0	0	0	0	0	0	0	1	0	1	0	N	0	0	0	0	1	0	0	0	m	65	high	2	0	0	0
a26nTR1781a	0	0	0	0	0	0	0	0	0	0	0	0	0	0	0	0	0	0	0	1	0	0	0	0	0	0	0	0	0	0	0	0	N	0	0	0	0	0	0	0	0	f	55	medium	0	0	0	1
a26pTR1782a	1	0	0	0	0	0	0	0	0	0	0	0	0	0	0	0	0	0	0	0	0	0	0	0	0	0	0	0	0	0	0	0	N	0	0	1	1	1	0	0	1	f	65	high	2	0	0	1
a271TR0431b	0	0	0	0	0	0	0	0	0	0	0	0	0	0	0	0	0	0	0	0	0	0	1	0	0	0	0	0	1	0	1	0	N	0	0	0	0	0	0	0	1	f	42	high	0	0	0	1
a275TR1793a	1	0	0	0	0	0	0	0	0	0	0	0	0	0	0	0	0	0	0	0	0	0	0	0	0	0	0	0	0	0	0	0	N	0	0	0	0	0	0	0	0	m	67	medium	1	0	0	1
a276TR1799a	0	0	0	0	0	0	1	0	0	0	1	0	1	0	0	0	0	0	0	0	0	0	0	0	0	0	1	0	0	0	1	0	N	0	0	0	0	0	0	0	1	m	30	high	0	0	0	1
a278TR9958a	1	0	0	0	0	0	0	0	0	0	0	0	0	0	0	0	0	0	0	0	0	0	0	0	0	0	0	0	0	0	0	0	N	1	0	0	0	0	0	0	0	m	41	high	0	0	0	1
a27wTR1821a	0	0	0	0	0	1	0	0	0	0	0	0	0	0	1	0	0	0	0	0	0	0	0	0	0	0	0	0	1	0	1	0	A	0	0	0	0	0	0	0	1	f	26	medium	0	0	0	1
a296TR1858a	0	0	0	0	0	0	0	0	0	0	0	0	0	0	0	0	0	0	0	0	0	0	0	1	0	0	0	0	0	0	0	0	N	0	0	0	0	0	0	0	0	m	38	high	0	0	0	1
a298TR1862a	0	0	0	0	1	0	1	0	0	0	0	0	0	0	1	0	0	0	0	0	0	0	0	0	0	0	0	1	0	0	0	0	N	0	0	0	0	1	0	0	0	f	40	high	1	0	0	1
a29mTR1875a	0	0	0	0	1	0	0	0	0	0	0	0	0	0	0	0	0	0	0	0	0	0	0	0	0	0	0	0	0	0	0	0	N	0	0	0	0	0	0	0	1	f	17	high	2	0	0	1
a29rTR1879a	0	0	0	1	0	0	0	0	0	0	0	0	0	0	0	0	0	0	0	0	0	0	0	0	0	0	0	0	0	0	0	0	N	0	0	0	0	0	0	1	1	m	34	high	0	0	0	0
a2a9TR1893a	0	0	0	1	0	1	0	1	0	0	0	0	0	0	0	0	0	0	0	0	0	0	0	0	0	0	0	0	0	1	1	0	A	0	0	0	0	0	0	0	0	f	38	high	1	0	0	1
a2ahTR1900a	0	0	0	0	1	0	0	0	0	0	1	0	0	0	0	0	0	0	1	0	0	0	0	0	0	0	0	0	1	0	0	0	N	0	0	0	0	1	0	0	0	f	32	high	0	0	0	1
a2ajTR1901a	1	0	0	0	0	0	0	0	0	0	0	0	0	0	0	0	0	0	0	0	0	0	0	0	0	0	0	0	0	0	0	0	N	0	0	0	1	0	1	0	0	m	48	high	0	0	0	0
a2c6TR1919a	0	0	0	0	0	0	0	0	0	0	0	0	1	0	0	0	0	0	0	0	0	0	0	1	0	0	0	0	0	0	1	0	N	0	0	0	0	0	0	0	0	m	29	high	0	0	0	1
a2cjTR1932a	0	0	0	0	0	0	0	0	0	0	0	0	0	0	0	0	0	0	0	0	0	0	0	0	0	0	0	0	1	0	0	0	N	0	0	0	0	0	0	0	0	m	38	high	1	0	0	1
a2crTR1642b	1	0	0	0	0	0	0	0	0	0	0	0	0	0	0	0	0	0	0	0	0	0	0	0	0	0	0	0	0	0	0	0	N	0	0	0	0	1	0	0	0	m	72	high	0	0	0	1
a2d2TR1951a	1	0	0	0	0	0	0	0	0	0	0	0	0	0	0	0	0	0	0	0	0	0	0	0	0	0	0	0	0	0	0	0	N	0	0	0	1	0	0	0	0	f	60	high	0	0	0	1
a2d3TR1997a	0	0	0	0	0	0	0	0	0	0	0	0	1	1	0	0	0	0	0	1	1	0	0	1	1	0	0	0	0	0	1	0	N	1	0	1	0	0	1	1	1	m	51	high	4	0	0	0
a2d5TR1953a	0	0	0	0	0	0	0	0	0	0	0	0	0	0	0	0	0	0	0	0	0	0	0	1	0	0	0	1	0	0	0	0	N	0	0	0	0	0	0	0	0	m	51	high	1	0	0	0
a2d6TR1952a	1	0	0	0	0	0	0	0	0	0	0	0	0	0	0	0	0	0	0	0	0	0	0	0	0	0	0	0	0	0	0	0	N	0	1	0	0	0	0	0	0	m	66	high	3	0	0	1
a2d7TR1955a	1	0	0	0	0	0	0	0	0	0	0	0	0	0	0	0	0	0	0	0	0	0	0	0	0	0	0	0	0	0	0	0	A	0	0	0	1	0	0	0	1	m	47	medium	0	0	0	0
a2d8TR1962a	1	0	0	0	0	0	0	0	0	0	0	0	0	0	0	0	0	0	0	0	0	0	0	0	0	0	0	0	0	0	0	0	N	0	0	0	0	0	0	0	0	m	66	medium	0	0	0	0
a2dcTR1959a	0	0	0	0	0	0	0	0	0	0	0	0	0	1	1	0	0	0	0	0	0	0	1	0	0	0	0	0	0	0	1	0	N	0	0	0	0	0	0	0	1	f	35	high	0	1	2	1
a2deTR1960a	1	0	0	0	0	0	0	0	0	0	0	0	0	0	0	0	0	0	0	0	0	0	0	0	0	0	0	0	0	0	0	0	N	0	0	0	0	0	0	0	0	m	45	high	1	0	0	1
a2dmTR1970a	1	0	0	0	0	0	0	0	0	0	0	0	0	0	0	0	0	0	0	0	0	0	0	0	0	0	0	0	0	0	0	0	A	0	0	0	0	0	0	0	0	f	69	medium	0	0	0	0
a2drTR1968a	0	0	0	0	0	0	0	0	0	0	1	0	1	0	0	0	0	0	0	0	0	0	0	0	0	0	0	0	0	0	0	0	N	0	0	0	1	0	0	0	1	f	11	high	0	0	0	0
a2dxTR1973a	0	0	0	0	0	0	0	0	0	0	0	0	0	0	0	0	0	0	0	0	0	0	1	0	0	0	0	0	0	0	0	0	N	0	0	0	1	0	1	0	1	f	56	high	1	0	0	1
a2e4TR1978a	1	0	0	0	0	0	0	0	0	0	0	0	0	0	0	0	0	0	0	0	0	0	0	0	0	0	0	0	0	0	0	0	N	0	0	0	0	0	0	0	0	m	50	high	0	0	0	0
a2e7TR1981a	1	0	0	0	0	0	0	0	0	0	0	0	0	0	0	0	0	0	0	0	0	0	0	0	0	0	0	0	0	0	0	0	N	0	0	0	0	0	0	0	1	f	42	medium	0	0	0	1
a2e8TR1983a	1	0	0	0	0	0	0	0	0	0	0	0	0	0	0	0	0	0	0	0	0	0	0	0	0	0	0	0	0	0	0	0	N	0	0	0	1	0	0	0	0	f	35	high	0	0	0	1
a2edTR1988a	0	0	0	0	0	0	0	0	0	0	0	0	0	0	0	0	0	0	0	0	1	0	0	0	0	0	0	0	0	0	0	0	N	0	0	0	1	0	0	0	0	f	62	high	0	1	2	1
a2ehTR8292a	0	0	0	0	0	0	1	0	0	0	0	0	1	0	0	0	0	0	0	0	0	0	1	0	0	0	0	0	0	0	0	0	N	0	0	0	0	1	0	0	0	f	38	high	1	0	0	1
a2f3TR2019a	1	0	0	0	0	0	0	0	0	0	0	0	0	0	0	0	0	0	0	0	0	0	0	0	0	0	0	0	0	0	0	0	N	0	0	0	1	0	0	0	0	m	9	medium	0	0	0	0
a2f7TR2028a	1	0	0	0	0	0	0	0	0	0	0	0	0	0	0	0	0	0	0	0	0	0	0	0	0	0	0	0	0	0	0	0	A	0	0	0	0	0	0	0	0	m	72	medium	1	1	2	1
a2fcTR2033a	0	0	0	0	0	0	0	0	0	0	1	0	0	0	0	0	0	0	0	0	0	0	0	0	0	0	0	0	0	0	1	0	N	0	0	0	0	0	0	0	0	f	45	high	1	0	0	1
a2h5TR2054a	0	0	0	0	0	0	1	0	0	0	0	0	0	0	0	0	0	0	0	0	0	0	1	0	0	0	0	0	1	0	0	0	N	0	0	0	0	0	0	1	1	f	31	high	1	0	0	1
a2h7TR2058a	0	0	0	0	0	0	0	0	0	0	0	0	0	0	0	0	0	0	0	0	0	0	0	0	0	0	0	0	0	0	1	0	N	0	0	0	0	0	0	0	0	m	31	high	1	0	0	1
a2jtTR2116a	1	0	0	0	0	0	0	0	0	0	0	0	0	0	0	0	0	0	0	0	0	0	0	0	0	0	0	0	0	0	0	0	N	0	0	0	1	0	0	0	0	f	65	high	0	0	0	1
a2k0TR2122a	0	0	0	0	0	0	0	0	0	0	0	0	0	0	0	0	0	0	0	0	0	0	0	0	0	0	0	0	1	0	0	0	N	0	0	0	0	0	0	0	0	f	35	high	0	0	0	1
a2k9TR2138a	1	0	0	0	0	0	0	0	0	0	0	0	0	0	0	0	0	0	0	0	0	0	0	0	0	0	0	0	0	0	0	0	N	0	0	0	0	0	0	0	0	m	66	high	0	0	0	1
a2krTR2157a	0	0	0	0	0	0	0	0	0	0	0	0	1	1	0	1	0	0	0	0	0	0	0	0	0	0	0	0	0	0	0	0	N	0	0	0	0	1	1	0	0	m	21	medium	2	0	0	0
a2m0TR2160a	0	0	0	0	0	0	0	0	0	0	1	0	0	0	0	0	0	0	1	0	0	0	0	0	0	0	0	0	0	0	0	0	A	0	0	0	0	0	0	0	1	m	30	medium	0	0	0	1
a2m5TR2165a	0	0	0	0	0	0	0	0	0	0	0	0	0	0	0	0	0	0	0	0	0	0	0	0	0	0	0	1	0	0	1	0	A	0	1	0	0	0	0	0	0	m	42	medium	0	0	0	1
a2m9TR2170a	1	0	0	0	0	0	0	0	0	0	0	0	0	0	0	0	0	0	0	0	0	0	0	0	0	0	0	0	0	0	0	0	N	0	0	0	0	0	0	0	0	m	44	high	0	0	0	1
a2nkTR2217a	0	0	0	0	0	0	0	0	0	0	1	0	1	0	0	0	0	0	0	1	0	0	0	0	0	0	0	0	0	0	0	0	N	0	0	0	0	0	0	0	0	f	22	high	1	0	0	1
a2p2TR6261b	0	0	0	0	0	0	1	0	0	0	0	0	0	0	0	0	0	0	0	0	0	0	0	0	0	0	0	0	0	0	0	0	N	0	0	0	0	0	0	0	0	m	60	high	0	0	0	0
a2pmTR2267a	0	0	0	0	0	0	0	1	0	0	0	1	0	0	0	0	0	0	0	0	1	1	0	0	0	0	0	0	0	0	1	0	A	1	0	0	0	0	0	0	0	f	65	medium	2	1	1	1
a2pwTR2272a	0	0	0	0	0	0	0	0	0	0	0	1	0	0	0	0	0	0	0	1	0	0	0	0	0	0	0	0	0	1	0	0	A	0	0	0	0	0	0	0	0	m	64	high	1	0	0	1
a2t7TR1257b	1	0	0	0	0	0	0	0	0	0	0	0	0	0	0	0	0	0	0	0	0	0	0	0	0	0	0	0	0	0	0	0	N	1	1	0	1	0	0	0	0	f	53	medium	2	0	0	0
a2tcTR2323a	1	0	0	0	0	0	0	0	0	0	0	0	0	0	0	0	0	0	0	0	0	0	0	0	0	0	0	0	0	0	0	0	A	0	0	0	1	0	0	0	0	f	41	high	0	0	0	1
a2thTR2328a	0	0	0	0	0	0	0	0	0	0	0	0	0	0	1	0	0	0	0	0	0	0	0	1	0	0	0	0	0	0	0	0	N	0	0	0	0	0	0	0	0	m	39	high	0	0	0	0
a2tkTR2331a	1	0	0	0	0	0	0	0	0	0	0	0	0	0	0	0	0	0	0	0	0	0	0	0	0	0	0	0	0	0	0	0	N	0	0	0	0	0	0	0	0	m	35	high	0	0	0	1
a2ttTR2341a	0	0	0	0	0	1	1	0	0	0	0	0	1	0	0	0	0	0	1	0	0	0	0	0	0	0	0	0	0	0	1	0	N	0	0	0	0	0	0	0	0	f	59	medium	1	0	0	1
a2w0TR2344a	0	0	0	0	0	0	0	0	0	0	0	0	0	0	1	0	0	0	0	0	0	0	0	0	0	0	0	0	0	0	1	0	N	0	0	0	1	0	0	0	0	m	61	medium	1	0	0	1
a2w3TR2348a	1	0	0	0	0	0	0	0	0	0	0	0	0	0	0	0	0	0	0	0	0	0	0	0	0	0	0	0	0	0	0	0	N	0	0	0	0	0	0	0	0	m	29	high	0	0	0	0
a2xhTR2396a	1	0	0	0	0	0	0	0	0	0	0	0	0	0	0	0	0	0	0	0	0	0	0	0	0	0	0	0	0	0	0	0	N	0	0	0	0	0	0	0	0	f	11	medium	0	0	0	0
a2xrTR2405a	0	0	0	0	0	0	0	0	0	0	0	0	0	0	0	0	0	0	1	0	0	0	0	1	0	0	0	0	0	0	0	0	A	0	0	0	0	0	0	0	0	f	61	high	0	0	0	1
a300TR2411a	0	0	0	0	0	0	0	0	0	0	0	0	0	0	0	0	0	0	0	0	0	0	0	1	0	0	0	0	0	1	0	0	A	0	0	0	0	0	0	0	0	m	66	medium	1	0	0	1
a302TR2414a	1	0	0	0	0	0	0	0	0	0	0	0	0	0	0	0	0	0	0	0	0	0	0	0	0	0	0	0	0	0	0	0	N	0	0	0	0	0	0	0	0	f	15	medium	1	0	0	0
a304TR1187b	1	0	0	0	0	0	0	0	0	0	0	0	0	0	0	0	0	0	0	0	0	0	0	0	0	0	0	0	0	0	0	0	N	0	0	0	0	0	0	0	0	m	54	high	1	0	0	1
a305TR2419a	1	0	0	0	0	0	0	0	0	0	0	0	0	0	0	0	0	0	0	0	0	0	0	0	0	0	0	0	0	0	0	0	N	0	0	0	0	0	0	0	1	m	59	high	0	0	0	1
a309TR2428a	0	0	0	0	0	0	0	0	0	0	1	1	0	0	0	0	0	0	0	0	0	0	1	0	0	0	0	0	0	1	0	0	N	0	0	0	1	0	0	0	0	f	59	high	1	0	0	0
a30aTR2430a	1	0	0	0	0	0	0	0	0	0	0	0	0	0	0	0	0	0	0	0	0	0	0	0	0	0	0	0	0	0	0	0	N	0	0	0	0	0	1	0	1	f	60	medium	1	0	0	1
a30rTR2442a	0	0	0	0	0	0	0	0	0	0	0	0	0	0	0	0	0	0	0	0	0	0	0	1	0	0	0	0	0	1	0	1	N	0	0	0	0	0	0	0	0	m	47	high	3	0	0	1
a310TR2451a	1	0	0	0	0	0	0	0	0	0	0	0	0	0	0	0	0	0	0	0	0	0	0	0	0	0	0	0	0	0	0	0	N	0	0	0	0	0	0	0	0	f	11	medium	0	0	0	1
a31eTR2467a	1	0	0	0	0	0	0	0	0	0	0	0	0	0	0	0	0	0	0	0	0	0	0	0	0	0	0	0	0	0	0	0	N	0	0	0	0	1	0	0	0	m	47	medium	0	0	0	0
a31fTR7782a	1	0	0	0	0	0	0	0	0	0	0	0	0	0	0	0	0	0	0	0	0	0	0	0	0	0	0	0	0	0	0	0	N	0	0	0	1	0	0	0	0	m	52	high	1	0	0	0
a327TR2496a	1	0	0	0	0	0	0	0	0	0	0	0	0	0	0	0	0	0	0	0	0	0	0	0	0	0	0	0	0	0	0	0	N	0	0	0	1	0	0	0	0	m	64	medium	2	0	0	0
a32mTR2505a	1	0	0	0	0	0	0	0	0	0	0	0	0	0	0	0	0	0	0	0	0	0	0	0	0	0	0	0	0	0	0	0	A	0	0	0	0	0	0	0	1	m	52	high	1	0	0	0
a32pTR2508a	0	0	0	0	0	0	0	0	0	0	0	0	0	0	0	0	0	0	0	0	0	0	0	1	0	0	0	0	0	1	1	0	N	0	0	0	0	0	0	0	0	f	45	high	1	1	2	1
a333TR2517a	1	0	0	0	0	0	0	0	0	0	0	0	0	0	0	0	0	0	0	0	0	0	0	0	0	0	0	0	0	0	0	0	N	0	0	0	0	0	0	0	0	f	46	high	0	0	0	1
a335TR2518a	0	0	0	0	0	0	1	0	0	0	0	0	0	0	0	0	1	0	0	0	0	1	1	0	0	1	0	0	0	0	1	0	N	0	0	0	1	0	0	0	0	f	39	medium	1	0	0	1
a33kTR2535a	1	0	0	0	0	0	0	0	0	0	0	0	0	0	0	0	0	0	0	0	0	0	0	0	0	0	0	0	0	0	0	0	N	0	0	0	0	1	1	0	1	m	64	high	0	0	0	1
a33mTR2538a	1	0	0	0	0	0	0	0	0	0	0	0	0	0	0	0	0	0	0	0	0	0	0	0	0	0	0	0	0	0	0	0	N	0	0	0	0	0	0	0	1	m	36	high	0	0	0	0
a33pTR8509a	0	0	0	1	0	0	0	0	0	0	0	0	0	0	0	0	1	0	0	1	0	0	1	1	0	1	0	0	0	0	1	0	N	0	0	0	0	0	0	0	0	m	71	high	0	0	0	0
a33rTR2541a	1	0	0	0	0	0	0	0	0	0	0	0	0	0	0	0	0	0	0	0	0	0	0	0	0	0	0	0	0	0	0	0	N	0	0	0	1	0	0	0	0	m	41	medium	0	0	0	1
a33tTR2543a	1	0	0	0	0	0	0	0	0	0	0	0	0	0	0	0	0	0	0	0	0	0	0	0	0	0	0	0	0	0	0	0	A	0	0	0	1	1	1	0	0	m	65	high	0	1	1	1
a34eTR2562a	1	0	0	0	0	0	0	0	0	0	0	0	0	0	0	0	0	0	0	0	0	0	0	0	0	0	0	0	0	0	0	0	N	0	0	0	0	0	0	0	0	f	46	high	0	0	0	1
a34kTR2564a	0	0	0	0	0	0	0	0	0	0	0	0	0	0	0	0	0	0	0	0	0	0	0	0	0	0	0	0	0	0	1	0	N	0	0	0	0	0	0	0	0	f	56	medium	2	1	2	1
a34nTR2568a	0	0	0	0	0	0	0	0	0	0	0	0	1	0	0	0	0	0	0	0	0	1	0	0	0	0	0	0	0	0	0	0	A	0	0	0	0	1	0	0	0	m	50	medium	0	0	0	1
a34wTR2574a	0	0	0	0	0	0	0	0	0	0	0	0	0	0	0	0	0	0	0	0	0	0	0	0	0	0	0	0	1	0	0	0	N	0	0	0	0	0	0	0	0	f	35	high	0	0	0	1
a359TR2583a	0	0	0	0	0	0	0	0	0	0	1	0	1	0	0	0	0	0	0	0	0	0	0	1	0	1	0	0	0	0	0	0	N	0	0	0	0	1	0	0	0	m	58	medium	0	0	0	1
a368TR2617a	0	0	0	0	0	1	0	0	0	0	0	0	1	0	0	0	0	0	0	0	0	0	1	1	0	0	0	0	0	0	0	0	N	0	0	0	0	0	0	0	1	f	57	high	0	0	0	0
a36jTR2625a	0	0	0	0	0	0	0	0	0	0	0	0	0	0	0	0	0	1	0	0	0	0	1	1	0	1	0	0	0	0	0	0	N	0	0	0	1	0	0	0	1	f	42	high	1	0	0	1
a36mTR2627a	0	0	0	0	0	0	0	0	0	0	0	0	1	0	0	0	0	0	0	0	0	0	0	0	0	0	0	0	0	0	0	0	N	0	0	0	0	0	0	0	0	f	48	high	1	0	0	1
a36nTR2629a	1	0	0	0	0	0	0	0	0	0	0	0	0	0	0	0	0	0	0	0	0	0	0	0	0	0	0	0	0	0	0	0	N	0	0	0	0	0	0	0	0	f	50	high	0	0	0	1
a377TR2641a	0	0	0	0	0	0	0	0	0	0	1	0	1	0	0	1	0	0	0	0	0	0	0	1	0	0	0	0	0	0	1	0	A	0	1	0	0	0	0	0	0	m	39	medium	0	0	0	1
a379TR2642a	1	0	0	0	0	0	0	0	0	0	0	0	0	0	0	0	0	0	0	0	0	0	0	0	0	0	0	0	0	0	0	0	N	0	0	0	0	0	1	0	1	m	63	high	0	0	0	1
a37wTR2659a	0	0	0	0	0	0	0	1	0	0	0	0	0	0	0	0	0	0	0	0	0	0	0	0	0	0	0	0	0	0	1	0	N	0	0	0	0	1	0	0	0	m	34	high	0	0	0	1
a382TR2662a	1	0	0	0	0	0	0	0	0	0	0	0	0	0	0	0	0	0	0	0	0	0	0	0	0	0	0	0	0	0	0	0	N	0	0	0	0	0	0	0	0	m	66	high	2	0	0	1
a38aTR2686a	1	0	0	0	0	0	0	0	0	0	0	0	0	0	0	0	0	0	0	0	0	0	0	0	0	0	0	0	0	0	0	0	N	0	0	0	0	0	0	0	0	f	54	medium	2	0	0	1
a38rTR2691a	1	0	0	0	0	0	0	0	0	0	0	0	0	0	0	0	0	0	0	0	0	0	0	0	0	0	0	0	0	0	0	0	N	0	0	0	1	0	1	0	1	m	31	high	0	0	0	1
a390TR2695a	0	0	0	0	0	0	0	0	0	0	1	0	0	0	0	0	0	0	0	0	0	0	0	0	0	0	0	0	0	0	0	0	N	0	0	0	0	1	0	0	0	f	40	high	0	0	0	1
a395TR2702a	0	0	0	0	0	0	0	0	0	0	0	0	0	0	0	0	0	0	0	0	1	0	0	0	0	0	0	0	0	0	0	0	N	0	0	0	0	0	0	0	1	m	66	high	2	1	1	1
a39aTR2716a	0	0	0	0	0	0	0	0	0	0	0	0	0	0	0	0	0	0	0	0	1	0	0	0	0	0	0	0	0	0	1	0	N	0	0	0	0	0	0	0	1	f	27	high	0	0	0	1
a39jTR2719a	0	0	0	0	0	0	0	0	0	0	0	0	1	0	0	0	0	0	0	0	0	0	0	0	0	0	0	0	0	0	0	0	N	0	0	0	1	1	0	0	0	m	37	high	0	0	0	1
a39xTR2725a	1	0	0	0	0	0	0	0	0	0	0	0	0	0	0	0	0	0	0	0	0	0	0	0	0	0	0	0	0	0	0	0	N	0	0	0	0	0	0	0	0	f	53	medium	0	0	0	1
a3a8TR2745a	1	0	0	0	0	0	0	0	0	0	0	0	0	0	0	0	0	0	0	0	0	0	0	0	0	0	0	0	0	0	0	0	A	0	0	0	1	0	0	0	1	m	52	medium	0	0	0	0
a3aaTR2747a	0	0	0	0	1	0	1	0	0	0	0	0	1	0	0	0	0	0	0	0	0	0	0	0	0	0	0	0	1	1	0	0	N	0	0	0	0	0	0	0	0	m	42	high	1	0	0	1
a3adTR2749a	0	0	0	0	0	0	0	0	0	0	0	0	0	0	0	0	0	0	0	0	1	0	0	0	1	0	0	0	0	0	0	0	N	0	0	0	1	0	0	0	0	f	25	high	0	0	0	1
a3atTR2759a	0	0	0	0	0	0	0	1	0	1	0	0	1	0	1	0	0	0	0	0	0	0	0	0	0	0	0	0	0	0	0	0	N	0	0	0	0	1	0	0	0	f	70	high	2	0	0	1
a3c1TR2767a	0	0	0	0	0	0	0	1	0	0	0	0	0	0	0	0	0	0	0	0	0	1	0	0	1	0	0	1	0	0	1	0	N	0	0	0	0	0	0	0	0	f	41	high	1	0	0	0
a3c6TR2773a	1	0	0	0	0	0	0	0	0	0	0	0	0	0	0	0	0	0	0	0	0	0	0	0	0	0	0	0	0	0	0	0	N	0	0	0	0	0	0	0	0	m	65	high	1	0	0	1
a3c8TR2775a	0	0	0	0	0	0	0	1	0	0	1	0	0	0	0	0	0	0	1	0	0	0	1	0	0	0	0	0	1	0	1	0	N	0	0	0	0	1	0	0	0	m	65	medium	4	0	0	1
a3cfTR2779a	1	0	0	0	0	0	0	0	0	0	0	0	0	0	0	0	0	0	0	0	0	0	0	0	0	0	0	0	0	0	0	0	A	0	0	0	0	0	0	0	0	m	71	high	0	0	0	0
a3cwTR2797a	0	0	0	0	0	0	0	0	0	0	0	0	0	0	0	0	0	0	0	0	0	0	0	0	0	0	0	0	0	0	1	0	N	0	0	0	0	0	0	0	0	m	37	high	3	0	0	1
a3djTR2817a	0	0	0	1	0	0	0	0	0	0	1	0	0	0	0	0	0	0	0	0	0	0	0	0	0	0	0	0	0	0	1	0	N	0	0	0	0	0	0	0	0	m	31	high	0	0	0	1
a3e6TR2840a	0	0	0	0	1	0	0	0	0	0	0	0	0	0	1	0	0	0	1	0	0	0	0	0	1	0	0	0	0	0	0	0	N	0	0	0	0	0	0	0	0	m	44	medium	0	0	0	1
a3e7TR2843a	0	0	0	0	0	0	0	0	0	0	0	0	1	0	0	0	0	0	0	0	0	0	0	0	1	0	0	1	0	0	1	0	N	0	0	0	0	0	1	0	1	f	41	high	0	0	0	1
a3e9TR2847a	1	0	0	0	0	0	0	0	0	0	0	0	0	0	0	0	0	0	0	0	0	0	0	0	0	0	0	0	0	0	0	0	A	0	0	0	0	1	0	1	0	m	34	medium	1	1	2	1
a3ekTR2857a	0	0	0	0	0	0	0	0	0	0	0	0	0	1	0	0	0	0	0	0	0	0	0	0	0	0	0	0	0	0	0	0	N	0	0	0	0	1	0	0	0	f	54	medium	3	1	1	0
a3exTR2863a	1	0	0	0	0	0	0	0	0	0	0	0	0	0	0	0	0	0	0	0	0	0	0	0	0	0	0	0	0	0	0	0	A	0	0	0	1	0	0	0	1	m	73	high	0	0	0	0
a3f9TR2874a	0	0	0	0	1	0	0	0	0	0	0	1	0	0	0	1	0	0	0	1	0	0	0	0	0	0	0	0	0	0	0	0	A	0	0	0	1	0	1	0	0	f	68	medium	0	0	0	1
a3h3TR2898a	0	0	0	0	1	0	0	0	0	0	0	0	1	0	0	0	0	0	0	0	0	0	1	0	0	0	0	0	0	1	0	0	N	0	0	0	0	1	0	0	0	f	66	high	2	0	0	1
a3h6TR2900a	0	0	0	0	0	0	0	0	0	0	1	0	1	0	0	0	0	0	0	0	0	1	0	0	1	0	0	0	0	0	0	0	N	0	0	0	0	1	0	0	1	m	30	high	1	0	0	1
a3hdTR2903a	0	0	0	0	1	0	0	0	0	0	0	0	0	0	0	0	0	0	0	0	0	0	0	0	0	0	0	0	0	0	0	0	N	0	0	0	0	1	0	0	0	m	9	medium	0	0	0	1
a3hmTR2911a	1	0	0	0	0	0	0	0	0	0	0	0	0	0	0	0	0	0	0	0	0	0	0	0	0	0	0	0	0	0	0	0	N	0	0	0	0	0	0	0	0	f	48	medium	0	0	0	1
a3hwTR2918a	1	0	0	0	0	0	0	0	0	0	0	0	0	0	0	0	0	0	0	0	0	0	0	0	0	0	0	0	0	0	0	0	A	0	0	0	1	0	0	0	0	f	68	high	2	0	0	1
a3j1TR2920a	1	0	0	0	0	0	0	0	0	0	0	0	0	0	0	0	0	0	0	0	0	0	0	0	0	0	0	0	0	0	0	0	A	0	0	0	0	0	0	0	1	m	42	medium	1	0	0	0
a3j9TR2928a	0	0	0	0	0	0	0	0	0	0	0	0	1	0	0	0	0	0	1	1	0	0	0	1	1	1	0	1	0	0	1	0	N	0	0	0	1	0	0	0	1	f	26	medium	1	0	0	1
a3jjTR2938a	1	0	0	0	0	0	0	0	0	0	0	0	0	0	0	0	0	0	0	0	0	0	0	0	0	0	0	0	0	0	0	0	N	0	0	0	0	1	0	0	1	m	53	high	1	0	0	1
a3kfTR2995a	0	0	0	1	0	0	0	1	0	0	1	0	1	0	0	1	0	0	0	0	0	0	0	0	0	0	0	0	0	0	1	0	N	0	0	0	0	0	0	0	0	f	37	high	0	0	0	1
a3m6TR2983a	1	0	0	0	0	0	0	0	0	0	0	0	0	0	0	0	0	0	0	0	0	0	0	0	0	0	0	0	0	0	0	0	A	1	0	0	0	0	0	0	0	f	41	high	0	0	0	1
a3n1TR3008a	1	0	0	0	0	0	0	0	0	0	0	0	0	0	0	0	0	0	0	0	0	0	0	0	0	0	0	0	0	0	0	0	A	0	0	0	1	1	0	0	0	f	47	high	0	0	0	1
a3n6TR3015a	0	0	0	0	0	0	0	0	0	0	0	0	0	0	0	0	0	0	0	0	0	0	0	0	0	0	0	0	1	0	0	0	N	0	0	0	1	0	0	0	0	m	62	high	0	0	0	1
a3nnTR3023a	1	0	0	0	0	0	0	0	0	0	0	0	0	0	0	0	0	0	0	0	0	0	0	0	0	0	0	0	0	0	0	0	N	0	0	0	0	0	0	0	0	m	8	medium	0	0	0	1
a3p7TR3061a	1	0	0	0	0	0	0	0	0	0	0	0	0	0	0	0	0	0	0	0	0	0	0	0	0	0	0	0	0	0	0	0	N	0	0	0	0	0	1	0	1	f	32	high	0	0	0	1
a3paTR3044a	0	0	0	0	0	0	0	0	0	0	0	0	0	0	0	0	0	0	0	0	0	1	0	0	0	0	0	0	0	0	0	0	N	0	0	0	0	0	0	0	0	m	50	medium	0	0	0	1
a3pjTR3050a	1	0	0	0	0	0	0	0	0	0	0	0	0	0	0	0	0	0	0	0	0	0	0	0	0	0	0	0	0	0	0	0	N	0	0	0	0	1	0	0	0	m	71	medium	1	0	0	0
a3pkTR3052a	1	0	0	0	0	0	0	0	0	0	0	0	0	0	0	0	0	0	0	0	0	0	0	0	0	0	0	0	0	0	0	0	N	0	0	0	0	0	0	0	0	m	39	high	0	0	0	1
a3r4TR3068a	0	0	0	0	0	0	0	0	0	0	0	0	0	0	0	0	0	0	0	0	0	0	0	0	0	0	0	0	0	1	0	0	A	0	0	0	0	0	0	0	0	m	61	high	0	0	0	1
a3rdTR3077a	1	0	0	0	0	0	0	0	0	0	0	0	0	0	0	0	0	0	0	0	0	0	0	0	0	0	0	0	0	0	0	0	N	0	0	1	0	1	0	0	1	f	61	medium	1	0	0	1
a3rhTR3084a	1	0	0	0	0	0	0	0	0	0	0	0	0	0	0	0	0	0	0	0	0	0	0	0	0	0	0	0	0	0	0	0	A	0	0	0	0	0	1	1	0	m	44	medium	1	1	1	1
a3rnTR3089a	1	0	0	0	0	0	0	0	0	0	0	0	0	0	0	0	0	0	0	0	0	0	0	0	0	0	0	0	0	0	0	0	N	0	0	0	0	0	0	0	0	m	32	high	0	0	0	1
a3rpTR3090a	0	0	0	0	0	0	0	0	0	0	0	0	0	0	1	0	0	0	0	0	0	0	0	0	0	0	0	0	0	0	0	0	N	0	0	0	0	0	0	0	0	f	36	high	1	0	0	1
a3rrTR3091a	1	0	0	0	0	0	0	0	0	0	0	0	0	0	0	0	0	0	0	0	0	0	0	0	0	0	0	0	0	0	0	0	N	0	0	0	0	0	0	0	0	m	69	high	3	0	0	1
a3rxTR3092a	0	0	0	0	0	0	0	0	0	0	1	0	0	0	0	0	0	0	0	0	0	0	0	0	0	0	0	0	0	0	0	0	N	0	0	0	0	0	0	0	0	m	62	high	1	0	0	0
a3t9TR3105a	1	0	0	0	0	0	0	0	0	0	0	0	0	0	0	0	0	0	0	0	0	0	0	0	0	0	0	0	0	0	0	0	N	0	0	0	0	0	0	0	0	m	65	medium	4	0	0	1
a3thTR3111a	0	0	0	0	0	0	0	0	0	0	0	0	0	0	0	0	0	0	0	0	0	0	0	0	0	0	0	0	0	0	1	0	N	0	0	0	0	1	0	0	0	m	42	high	0	0	0	1
a3twTR1300b	0	0	0	0	1	0	0	0	0	0	0	0	1	1	0	0	0	0	0	0	0	1	0	0	0	0	0	0	0	0	0	0	N	0	0	0	0	0	1	0	0	f	52	high	0	0	0	1
a3txTR3119a	0	0	0	0	1	0	0	0	0	0	0	0	0	0	1	0	0	0	0	0	1	0	0	0	0	0	0	0	1	0	1	0	N	0	0	0	0	0	0	0	0	m	33	high	0	0	0	1
a3w4TR3116a	1	0	0	0	0	0	0	0	0	0	0	0	0	0	0	0	0	0	0	0	0	0	0	0	0	0	0	0	0	0	0	0	A	0	0	0	0	0	0	0	0	m	78	high	0	1	2	1
a3w6TR3127a	1	0	0	0	0	0	0	0	0	0	0	0	0	0	0	0	0	0	0	0	0	0	0	0	0	0	0	0	0	0	0	0	N	0	0	0	0	1	0	0	0	m	54	medium	0	0	0	1
a3wjTR3138a	0	1	0	0	0	0	0	0	0	0	0	0	1	0	0	0	0	0	0	0	0	0	0	0	0	0	0	0	0	0	0	0	N	0	0	0	1	0	0	0	0	m	36	medium	1	0	0	1
a3wmTR3142a	0	0	0	0	0	0	0	0	0	0	0	0	0	0	0	0	0	0	0	0	0	0	0	0	0	1	0	0	0	0	0	0	N	0	0	0	0	0	0	0	0	m	32	high	1	0	0	1
a3wnTR3147a	0	0	0	1	0	0	0	0	0	0	0	0	1	0	0	0	0	0	0	0	0	0	0	0	0	0	0	0	0	0	1	0	N	0	0	0	0	1	0	0	0	m	38	medium	1	0	0	1
a3wpTR3148a	0	0	0	0	0	0	1	0	0	0	1	0	1	0	1	0	0	0	0	1	0	0	0	0	0	1	0	1	1	1	1	0	N	0	0	0	0	0	1	0	1	f	67	medium	4	0	0	0
a3x3TR3183a	1	0	0	0	0	0	0	0	0	0	0	0	0	0	0	0	0	0	0	0	0	0	0	0	0	0	0	0	0	0	0	0	N	0	0	0	0	1	0	0	0	m	24	high	0	0	0	1
a3x7TR3173a	0	0	0	0	1	0	1	0	0	0	1	0	0	0	0	0	0	0	0	1	0	0	1	1	1	0	0	1	0	0	1	0	N	0	0	0	0	1	0	1	0	m	39	medium	2	0	0	1
a3x9TR3184a	0	0	0	0	0	0	0	0	0	0	1	0	1	0	0	1	0	0	0	0	0	0	1	1	0	0	0	0	1	0	0	0	N	0	0	0	0	0	0	0	0	f	58	high	1	0	0	1
a403TR3197a	0	0	0	0	0	0	0	0	0	0	1	0	0	0	0	0	0	0	0	0	0	0	0	0	0	0	0	0	0	0	0	0	A	0	0	0	0	0	0	0	0	m	65	high	1	0	0	0
a408TR3204a	0	0	0	0	0	0	0	0	0	0	0	0	0	0	1	0	0	0	0	0	0	0	0	0	0	0	0	0	0	0	0	0	A	0	0	0	0	0	1	0	0	m	44	high	1	0	0	1
a40aTR3208a	0	0	0	0	0	0	0	0	0	0	0	0	0	0	0	0	0	0	0	0	0	0	0	0	0	0	0	0	0	0	1	0	N	0	0	0	1	0	0	0	0	f	33	high	0	0	0	0
a40fTR3211a	0	0	0	0	0	0	0	0	0	0	1	0	0	0	0	0	0	0	0	0	0	0	0	0	0	0	0	0	0	0	0	0	N	0	0	0	0	1	1	0	1	m	53	medium	0	0	0	1
a40kTR3212a	0	0	0	1	1	1	0	1	0	0	1	0	1	0	0	1	0	0	0	1	0	0	0	1	0	0	0	0	0	0	1	0	N	0	0	0	0	0	0	0	0	m	44	high	1	1	1	1
a40nTR3220a	0	0	0	0	0	0	0	0	0	0	0	0	0	0	0	0	0	0	0	0	0	0	0	0	0	0	0	0	0	0	0	0	N	0	0	0	0	0	0	0	0	m	34	high	0	0	0	1
a412TR3227a	1	0	0	0	0	0	0	0	0	0	0	0	0	0	0	0	0	0	0	0	0	0	0	0	0	0	0	0	0	0	0	0	N	0	0	0	0	0	0	0	0	m	33	medium	1	0	0	1
a418TR3231a	0	0	0	0	0	0	0	0	0	0	0	1	0	0	1	0	1	0	0	0	0	0	0	0	0	0	0	0	0	0	0	0	N	0	0	0	0	0	0	0	0	m	72	high	1	0	0	1
a41nTR3242a	1	0	0	0	0	0	0	0	0	0	0	0	0	0	0	0	0	0	0	0	0	0	0	0	0	0	0	0	0	0	0	0	N	0	0	0	0	0	0	0	0	f	64	high	0	0	0	1
a421TR3248a	0	0	0	0	0	1	0	0	0	0	0	0	1	0	0	0	1	0	0	0	0	0	1	0	0	1	0	0	0	0	1	0	A	0	0	0	0	0	0	0	1	f	59	high	3	0	0	1
a42cTR3266a	0	0	0	0	0	0	0	0	0	0	0	0	0	1	0	0	0	0	0	0	0	0	0	0	0	0	0	0	0	0	0	0	A	0	0	0	1	0	0	0	0	m	49	high	1	1	0	0
a435TR3297a	0	0	0	0	0	0	0	0	0	0	0	0	0	0	0	0	0	0	0	0	0	0	0	1	0	0	0	0	0	0	0	0	N	0	0	0	0	0	0	0	0	m	34	high	1	0	0	1
a43dTR3303a	1	0	0	0	0	0	0	0	0	0	0	0	0	0	0	0	0	0	0	0	0	0	0	0	0	0	0	0	0	0	0	0	N	0	0	0	0	0	0	0	0	m	10	high	0	0	0	0
a43eTR3304a	1	0	0	0	0	0	0	0	0	0	0	0	0	0	0	0	0	0	0	0	0	0	0	0	0	0	0	0	0	0	0	0	N	0	0	0	0	0	0	0	0	m	42	medium	0	0	0	1
a43fTR3305a	1	0	0	0	0	0	0	0	0	0	0	0	0	0	0	0	0	0	0	0	0	0	0	0	0	0	0	0	0	0	0	0	N	0	0	0	0	1	0	0	0	m	65	high	0	0	0	1
a43jTR3356a	1	0	0	0	0	0	0	0	0	0	0	0	0	0	0	0	0	0	0	0	0	0	0	0	0	0	0	0	0	0	0	0	N	0	0	0	0	0	0	0	0	m	9	high	0	0	0	1
a448TR3320a	1	0	0	0	0	0	0	0	0	0	0	0	0	0	0	0	0	0	0	0	0	0	0	0	0	0	0	0	0	0	0	0	N	0	0	0	0	0	0	0	0	f	33	high	0	0	0	1
a44aTR3325a	1	0	0	0	0	0	0	0	0	0	0	0	0	0	0	0	0	0	0	0	0	0	0	0	0	0	0	0	0	0	0	0	N	0	0	0	1	0	0	0	0	f	50	high	0	0	0	0
a44hTR3333a	1	0	0	0	0	0	0	0	0	0	0	0	0	0	0	0	0	0	0	0	0	0	0	0	0	0	0	0	0	0	0	0	A	0	0	0	0	1	0	0	0	m	58	high	0	0	0	1
a44nTR3335a	0	0	0	1	0	0	0	0	0	0	1	0	0	0	0	0	0	0	1	0	0	0	0	0	0	0	0	0	0	0	1	0	N	0	0	0	0	1	1	0	1	m	14	high	0	0	0	1
a45xTR3383a	1	0	0	0	0	0	0	0	0	0	0	0	0	0	0	0	0	0	0	0	0	0	0	0	0	0	0	0	0	0	0	0	N	1	0	0	0	0	0	0	0	f	66	high	1	0	0	1
a461TR3388a	0	0	0	0	0	0	0	0	0	1	1	0	1	0	0	0	0	0	1	0	0	0	1	0	0	1	0	0	1	0	1	0	N	0	0	0	0	0	0	0	0	f	48	high	2	0	0	1
a46jTR3252a	0	0	0	0	0	0	0	0	0	0	0	0	1	0	0	0	0	0	0	1	0	0	0	1	0	0	0	0	0	0	0	0	N	0	0	0	0	0	0	0	0	f	56	high	3	0	0	1
a46mTR3411a	0	0	0	0	0	1	0	0	0	0	0	0	0	0	0	0	1	0	0	0	0	0	0	0	0	1	0	0	0	1	1	0	N	0	0	0	0	0	0	0	0	f	55	high	0	0	0	1
a477TR9509a	1	0	0	0	0	0	0	0	0	0	0	0	0	0	0	0	0	0	0	0	0	0	0	0	0	0	0	0	0	0	0	0	A	0	0	0	0	0	0	0	0	f	63	medium	1	0	0	0
a479TR3453a	0	0	0	1	0	0	1	0	1	1	1	0	0	0	0	1	1	0	0	0	0	0	0	0	0	1	0	0	0	0	1	0	A	0	0	0	0	1	0	0	0	f	36	high	3	1	2	0
a47pTR3451a	1	0	0	0	0	0	0	0	0	0	0	0	0	0	0	0	0	0	0	0	0	0	0	0	0	0	0	0	0	0	0	0	N	0	0	0	1	0	0	0	1	m	9	medium	0	0	0	1
a489TR3472a	0	0	0	0	0	0	0	0	0	0	0	0	0	0	0	0	0	0	0	0	0	0	0	1	0	0	0	0	0	0	0	0	N	0	0	0	0	0	0	0	0	f	67	high	2	0	0	1
a48pTR3487a	0	0	0	0	0	0	0	0	0	0	1	0	0	0	0	1	0	0	0	0	0	0	0	0	0	0	0	0	0	0	0	0	N	0	0	0	0	0	0	0	0	f	41	high	0	0	0	1
a49nTR3513a	0	0	0	0	0	0	0	0	0	0	0	0	0	0	0	0	0	0	0	0	0	0	0	1	0	0	0	0	0	0	1	0	N	0	0	0	1	1	0	0	0	f	26	medium	0	0	0	0
a49xTR0878b	1	0	0	0	0	0	0	0	0	0	0	0	0	0	0	0	0	0	0	0	0	0	0	0	0	0	0	0	0	0	0	0	A	0	0	0	0	1	0	0	1	m	60	medium	0	0	0	1
a4acTR3535a	0	0	0	0	0	0	0	0	0	0	0	0	0	0	0	1	0	0	0	1	0	0	1	1	0	1	0	0	0	0	0	0	N	0	0	0	0	0	0	0	0	f	54	medium	1	0	0	1
a4anTR3546a	0	0	0	0	0	0	0	1	0	0	0	0	0	0	0	0	0	0	0	0	0	0	0	0	0	0	0	0	0	0	0	0	N	0	0	0	0	1	0	0	0	m	35	high	0	0	0	1
a4c1TR3553a	0	0	0	0	0	1	0	1	0	0	1	0	1	0	0	0	0	0	0	1	0	0	1	1	1	1	0	1	1	0	1	0	N	0	0	0	0	1	0	0	1	f	35	medium	2	0	0	0
a4c2TR2483b	0	0	0	0	0	0	0	1	0	0	0	0	1	0	0	0	0	0	0	0	0	0	0	1	0	1	1	1	0	1	1	0	N	0	0	0	0	0	0	0	0	f	37	high	0	0	0	0
a4c3TR3556a	0	0	0	0	0	0	0	0	0	0	0	0	0	0	0	0	0	0	0	0	0	0	0	0	0	0	0	0	0	0	1	0	N	0	0	0	1	0	0	0	0	f	53	high	0	0	0	1
a4c4TR3557a	1	0	0	0	0	0	0	0	0	0	0	0	0	0	0	0	0	0	0	0	0	0	0	0	0	0	0	0	0	0	0	0	N	0	0	0	0	1	0	0	0	f	45	high	0	0	0	1
a4c5TR3559a	1	0	0	0	0	0	0	0	0	0	0	0	0	0	0	0	0	0	0	0	0	0	0	0	0	0	0	0	0	0	0	0	N	0	0	0	0	0	0	0	0	m	69	high	2	0	0	1
a4c6TR3560a	0	0	0	0	0	0	0	0	0	0	0	0	0	0	0	0	0	0	0	0	0	0	1	0	0	1	0	0	0	0	1	0	N	0	0	0	0	1	0	0	1	f	56	high	1	0	0	0
a4c9TR3567a	0	0	0	0	0	0	0	0	0	0	0	0	0	0	0	0	0	0	0	0	0	0	0	0	0	0	0	0	0	0	0	0	N	0	0	0	0	0	0	0	0	f	62	medium	2	0	0	1
a4ddTR3613a	0	0	0	0	0	0	0	0	0	0	1	0	1	0	0	0	0	0	1	0	0	0	0	0	0	0	0	0	0	0	0	0	N	0	0	0	0	0	0	0	0	f	26	high	1	0	0	1
a4dfTR3616a	1	0	0	0	0	0	0	0	0	0	0	0	0	0	0	0	0	0	0	0	0	0	0	0	0	0	0	0	0	0	0	0	N	0	0	0	0	0	0	0	0	m	61	medium	1	0	0	1
a4dpTR3629a	1	0	0	0	0	0	0	0	0	0	0	0	0	0	0	0	0	0	0	0	0	0	0	0	0	0	0	0	0	0	0	0	N	0	0	0	0	0	1	0	1	m	72	medium	1	0	0	1
a4drTR3630a	0	0	0	1	0	0	1	0	0	0	0	0	1	0	0	0	0	0	0	0	0	0	0	0	0	0	0	0	0	0	1	0	N	0	0	0	0	0	1	0	0	f	27	high	1	0	0	1
a4dwTR3635a	1	0	0	0	0	0	0	0	0	0	0	0	0	0	0	0	0	0	0	0	0	0	0	0	0	0	0	0	0	0	0	0	N	0	0	0	1	0	0	0	0	f	63	high	2	0	0	1
a4dxTR9692a	0	0	0	0	0	1	0	0	0	0	0	0	0	0	0	0	1	0	0	0	0	0	0	1	1	0	0	1	0	0	1	0	N	0	0	0	0	0	0	0	0	f	43	high	2	0	0	0
a4e5TR3649a	1	0	0	0	0	0	0	0	0	0	0	0	0	0	0	0	0	0	0	0	0	0	0	0	0	0	0	0	0	0	0	0	N	0	0	0	1	0	0	0	0	m	28	high	0	0	0	1
a4f6TR3680a	0	0	0	0	0	0	0	0	0	0	0	0	0	0	0	0	0	0	0	0	0	0	1	0	0	0	0	0	0	0	0	0	N	0	0	0	0	0	0	0	0	m	55	medium	0	0	0	1
a4feTR3690a	0	0	0	0	0	0	0	0	0	0	0	0	1	1	0	0	0	0	0	0	0	0	0	0	0	0	0	0	0	1	0	0	N	0	0	0	0	0	0	0	1	f	65	medium	1	0	0	0
a4fhTR3692a	1	0	0	0	0	0	0	0	0	0	0	0	0	0	0	0	0	0	0	0	0	0	0	0	0	0	0	0	0	0	0	0	A	0	0	0	0	0	0	0	0	f	10	high	0	0	0	0
a4fwTR3702a	1	0	0	0	0	0	0	0	0	0	0	0	0	0	0	0	0	0	0	0	0	0	0	0	0	0	0	0	0	0	0	0	A	0	0	0	0	0	1	0	0	f	8	low	0	0	0	1
a4hnTR3728a	1	0	0	0	0	0	0	0	0	0	0	0	0	0	0	0	0	0	0	0	0	0	0	0	0	0	0	0	0	0	0	0	A	0	0	0	0	0	0	0	0	m	54	medium	2	0	0	1
a4hwTR3777a	0	0	0	0	0	0	0	0	0	0	0	0	0	0	0	0	0	0	0	1	0	0	1	0	0	0	0	0	1	0	0	0	N	1	0	0	0	1	0	0	0	f	68	medium	0	0	0	1
a4j0TR3734a	1	0	0	0	0	0	0	0	0	0	0	0	0	0	0	0	0	0	0	0	0	0	0	0	0	0	0	0	0	0	0	0	N	0	0	0	1	0	0	0	0	m	62	medium	1	0	0	1
a4jfTR3760a	0	0	0	0	0	0	0	0	0	0	0	0	1	0	0	0	0	0	0	1	0	0	0	0	1	0	0	1	1	0	1	0	A	0	0	0	0	1	0	0	0	f	64	medium	2	0	0	1
a4k3TR3773a	0	0	0	0	0	0	0	1	0	0	1	0	0	0	0	0	0	0	0	0	0	0	0	0	0	0	0	0	0	0	0	0	N	0	0	0	0	0	0	0	0	m	66	medium	4	0	0	1
a4kpTR3791a	1	0	0	0	0	0	0	0	0	0	0	0	0	0	0	0	0	0	0	0	0	0	0	0	0	0	0	0	0	0	0	0	A	1	0	0	0	0	0	0	0	f	51	medium	0	0	0	1
a4m0TR3794a	1	0	0	0	0	0	0	0	0	0	0	0	0	0	0	0	0	0	0	0	0	0	0	0	0	0	0	0	0	0	0	0	N	0	0	0	0	1	0	0	0	f	30	high	1	0	0	0
a4maTR3808a	0	0	0	0	0	0	0	1	0	0	0	0	0	0	0	0	0	0	0	0	0	0	0	0	0	0	0	0	0	0	0	0	N	0	0	0	0	0	1	0	0	f	51	medium	1	0	0	1
a4meTR3811a	0	0	0	0	0	0	0	1	0	0	0	0	0	0	0	0	0	0	0	0	0	0	0	0	0	0	0	0	1	0	0	0	N	0	0	0	0	0	0	0	1	m	43	medium	0	1	1	1
a4mjTR3814a	0	0	0	0	0	0	0	0	0	0	1	0	0	0	0	0	0	0	0	0	0	0	0	0	0	0	0	0	0	0	0	0	N	0	0	0	0	1	0	0	0	f	41	high	0	0	0	1
a4mwTR3824a	0	0	0	0	0	0	0	1	0	0	0	0	1	1	1	0	0	0	0	1	0	1	1	1	0	0	0	0	0	0	1	0	N	0	0	0	1	1	0	0	0	f	57	medium	1	0	0	0
a4n7TR3833a	0	0	0	0	0	0	0	0	0	0	0	0	0	1	0	0	0	0	0	0	0	0	0	0	0	0	0	0	0	0	0	0	N	0	0	0	0	0	0	0	0	m	36	high	2	0	0	1
a4naTR3839a	1	0	0	0	0	0	0	0	0	0	0	0	0	0	0	0	0	0	0	0	0	0	0	0	0	0	0	0	0	0	0	0	N	0	0	0	0	0	1	0	0	m	58	low	0	0	0	0
a4ntTR3853a	1	0	0	0	0	0	0	0	0	0	0	0	0	0	0	0	0	0	0	0	0	0	0	0	0	0	0	0	0	0	0	0	A	0	0	0	0	0	0	0	0	m	55	medium	0	0	0	1
a4pfTR4296b	1	0	0	0	0	0	0	0	0	0	0	0	0	0	0	0	0	0	0	0	0	0	0	0	0	0	0	0	0	0	0	0	A	0	0	0	0	0	0	0	0	m	62	medium	0	0	0	1
a4pnTR3877a	0	0	0	0	0	0	0	0	0	0	1	0	1	0	0	0	0	0	0	0	0	0	0	0	0	0	0	0	0	0	0	0	A	0	0	0	0	0	0	0	1	m	64	medium	3	0	0	0
a4r0TR3994a	0	0	0	0	0	0	0	0	0	0	0	0	0	0	0	0	0	0	0	0	0	0	0	0	0	0	0	0	0	0	1	0	N	0	0	0	0	0	0	0	0	f	59	high	1	0	0	1
a4r8TR3895a	0	0	0	0	0	0	0	0	0	0	0	0	0	0	1	0	0	0	0	0	0	0	1	1	0	1	0	0	0	0	1	1	A	0	0	1	1	0	0	0	1	f	59	medium	2	1	2	1
a4rfTR3902a	0	0	0	0	0	1	0	0	0	0	0	0	0	0	0	0	0	0	0	0	0	0	0	1	0	0	0	0	0	1	1	0	N	0	0	0	0	0	0	0	0	f	47	high	2	0	0	1
a4t0TR3915a	0	0	0	0	0	0	0	0	0	0	0	0	0	0	0	0	0	0	0	0	0	0	0	1	0	1	0	0	0	0	0	0	A	1	0	0	0	0	0	0	0	f	73	medium	2	0	0	1
a4t1TR3916a	0	0	0	0	0	0	0	0	0	0	0	0	1	0	0	0	0	0	0	1	0	0	1	1	0	0	0	0	1	0	1	0	N	0	0	0	0	1	0	0	0	f	56	high	0	1	0	1
a4t6TR3924a	0	0	0	0	0	0	0	0	0	0	0	0	0	0	0	0	0	0	0	0	1	0	0	0	0	0	0	0	0	0	1	0	N	0	0	0	1	0	0	0	0	f	44	medium	0	0	0	1
a4tdTR3941a	1	0	0	0	0	0	0	0	0	0	0	0	0	0	0	0	0	0	0	0	0	0	0	0	0	0	0	0	0	0	0	0	N	0	0	0	0	0	0	0	0	f	66	medium	2	0	0	0
a4tnTR3945a	1	0	0	0	0	0	0	0	0	0	0	0	0	0	0	0	0	0	0	0	0	0	0	0	0	0	0	0	0	0	0	0	A	0	0	0	0	0	0	0	0	m	66	high	1	0	0	1
a4wdTR3976a	1	0	0	0	0	0	0	0	0	0	0	0	0	0	0	0	0	0	0	0	0	0	0	0	0	0	0	0	0	0	0	0	N	0	0	0	0	0	0	0	0	m	60	high	0	0	0	1
a4weTR3975a	1	0	0	0	0	0	0	0	0	0	0	0	0	0	0	0	0	0	0	0	0	0	0	0	0	0	0	0	0	0	0	0	A	0	0	0	0	0	0	0	0	m	46	medium	1	0	0	1
a4wmTR3983a	0	0	0	0	0	0	0	0	0	0	0	0	1	0	0	0	0	0	0	0	0	0	0	0	0	0	0	0	0	0	1	0	N	0	0	0	0	0	0	0	0	f	39	high	0	0	0	1
a4x2TR3998a	0	0	0	0	0	0	0	0	0	0	0	0	1	0	0	0	0	0	0	1	0	1	0	1	0	1	0	0	1	0	0	0	N	0	0	0	0	0	1	0	1	f	54	medium	0	0	0	1
a4x3TR4001a	1	0	0	0	0	0	0	0	0	0	0	0	0	0	0	0	0	0	0	0	0	0	0	0	0	0	0	0	0	0	0	0	N	0	0	0	0	0	0	0	0	m	64	high	0	0	0	1
a4xfTR4059a	1	0	0	0	0	0	0	0	0	0	0	0	0	0	0	0	0	0	0	0	0	0	0	0	0	0	0	0	0	0	0	0	N	0	0	0	1	1	0	0	1	m	55	high	2	0	0	1
a4xjTR4024a	1	0	0	0	0	0	0	0	0	0	0	0	0	0	0	0	0	0	0	0	0	0	0	0	0	0	0	0	0	0	0	0	N	0	0	0	0	1	0	0	0	m	21	medium	0	0	0	0
a50tTR4066a	0	0	0	0	0	0	0	0	0	0	1	0	0	0	0	0	0	0	0	0	0	0	0	1	0	0	0	0	0	0	0	0	N	0	0	0	0	0	0	1	0	m	25	high	0	0	0	1
a510TR4071a	0	0	0	0	0	0	0	1	0	0	1	0	0	0	0	0	0	0	0	0	0	0	1	0	0	1	0	0	0	0	1	0	N	0	0	0	1	0	0	0	0	f	66	high	2	0	0	1
a519TR4079a	1	0	0	0	0	0	0	0	0	0	0	0	0	0	0	0	0	0	0	0	0	0	0	0	0	0	0	0	0	0	0	0	N	0	0	0	0	0	0	0	0	f	62	high	0	0	0	0
a51cTR4086a	0	0	0	0	1	0	0	0	0	0	0	0	1	0	0	0	0	0	0	0	0	0	0	0	0	0	0	0	0	0	0	0	N	0	0	0	0	1	0	0	0	f	50	medium	0	0	0	0
a51fTR4089a	0	0	0	0	0	0	0	0	0	0	0	0	0	0	0	0	0	0	0	0	0	0	0	0	0	0	0	0	1	0	1	1	N	0	0	0	0	0	0	0	0	f	61	high	0	0	0	1
a51kTR4092a	0	0	0	0	0	0	0	0	0	0	0	0	0	0	0	0	0	0	0	1	0	0	0	0	1	0	0	1	0	0	0	0	N	0	0	0	0	1	0	0	1	m	61	high	2	0	0	0
a51xTR4110a	1	0	0	0	0	0	0	0	0	0	0	0	0	0	0	0	0	0	0	0	0	0	0	0	0	0	0	0	0	0	0	0	N	0	0	0	0	0	0	0	0	m	51	high	1	0	0	1
a52cTR4120a	1	0	0	0	0	0	0	0	0	0	0	0	0	0	0	0	0	0	0	0	0	0	0	0	0	0	0	0	0	0	0	0	N	0	0	0	0	0	0	0	0	m	61	medium	2	0	0	1
a52wTR4136a	1	0	0	0	0	0	0	0	0	0	0	0	0	0	0	0	0	0	0	0	0	0	0	0	0	0	0	0	0	0	0	0	N	0	0	0	0	1	0	0	0	f	30	medium	1	0	0	1
a533TR4142a	1	0	0	0	0	0	0	0	0	0	0	0	0	0	0	0	0	0	0	0	0	0	0	0	0	0	0	0	0	0	0	0	A	0	0	0	0	0	0	0	0	m	70	high	2	1	0	1
a53mTR4154a	0	0	0	0	0	0	0	0	0	0	0	0	0	0	0	0	0	0	0	0	0	1	0	1	0	0	0	0	1	0	0	0	A	0	0	0	1	0	0	0	1	m	71	high	0	0	0	0
a545TR4168a	0	0	0	0	0	0	0	0	0	0	0	0	0	0	0	0	0	0	0	0	0	0	0	0	0	1	0	0	0	0	0	0	A	0	0	0	0	0	0	0	1	m	26	low	0	0	0	0
a54hTR4181a	1	0	0	0	0	0	0	0	0	0	0	0	0	0	0	0	0	0	0	0	0	0	0	0	0	0	0	0	0	0	0	0	N	0	0	0	0	1	0	0	0	f	55	medium	0	0	0	1
a54wTR4190a	1	0	0	0	0	0	0	0	0	0	0	0	0	0	0	0	0	0	0	0	0	0	0	0	0	0	0	0	0	0	0	0	N	0	0	0	0	0	0	0	0	m	53	medium	1	0	0	0
a55aTR4215a	0	0	0	0	0	0	0	0	0	0	0	0	0	1	0	0	0	0	0	0	0	0	0	0	0	0	0	0	0	0	0	0	A	0	0	0	0	0	0	0	1	m	46	high	0	0	0	0
a55dTR4220a	0	0	0	0	1	0	0	0	0	0	1	0	0	0	1	0	0	0	0	1	0	0	1	0	0	0	0	0	0	0	0	0	N	0	0	0	0	0	0	0	0	f	43	medium	2	0	0	1
a55fTR4221a	1	0	0	0	0	0	0	0	0	0	0	0	0	0	0	0	0	0	0	0	0	0	0	0	0	0	0	0	0	0	0	0	N	0	0	0	1	0	0	0	0	f	44	high	0	0	0	1
a567TR4238a	1	0	0	0	0	0	0	0	0	0	0	0	0	0	0	0	0	0	0	0	0	0	0	0	0	0	0	0	0	0	0	0	N	0	0	0	1	0	0	0	0	f	64	high	3	0	0	0
a56nTR4251a	1	0	0	0	0	0	0	0	0	0	0	0	0	0	0	0	0	0	0	0	0	0	0	0	0	0	0	0	0	0	0	0	N	0	0	0	0	0	0	0	0	f	62	high	2	0	0	0
a56pTR4255a	0	0	0	0	0	0	0	0	0	0	0	0	0	1	0	0	0	0	0	1	0	0	0	1	0	0	0	0	0	0	1	0	N	0	0	0	0	1	0	0	0	f	58	high	3	0	0	1
a578TR4272a	1	0	0	0	0	0	0	0	0	0	0	0	0	0	0	0	0	0	0	0	0	0	0	0	0	0	0	0	0	0	0	0	N	0	0	0	0	0	0	0	1	f	34	medium	0	0	0	0
a57aTR4273a	1	0	0	0	0	0	0	0	0	0	0	0	0	0	0	0	0	0	0	0	0	0	0	0	0	0	0	0	0	0	0	0	A	0	0	0	0	0	0	0	1	f	32	high	1	0	0	1
a57dTR4279a	1	0	0	0	0	0	0	0	0	0	0	0	0	0	0	0	0	0	0	0	0	0	0	0	0	0	0	0	0	0	0	0	N	0	0	0	0	0	0	0	0	f	69	high	0	0	0	1
a57hTR4287a	0	0	0	0	0	0	0	0	0	0	0	0	1	0	0	0	0	0	0	0	0	0	0	0	0	0	0	0	0	0	0	0	N	0	0	0	0	0	0	0	1	f	28	high	1	0	0	1
a57mTR4309a	1	0	0	0	0	0	0	0	0	0	0	0	0	0	0	0	0	0	0	0	0	0	0	0	0	0	0	0	0	0	0	0	A	0	0	0	0	0	1	0	0	m	54	high	0	0	0	0
a58aTR4330a	0	0	0	0	1	0	1	0	0	0	0	0	0	0	0	0	0	0	0	0	0	0	1	0	0	0	0	0	1	0	0	0	N	0	0	0	0	0	0	0	0	f	54	high	1	0	0	0
a58dTR4322a	1	0	0	0	0	0	0	0	0	0	0	0	0	0	0	0	0	0	0	0	0	0	0	0	0	0	0	0	0	0	0	0	N	0	0	0	0	0	0	0	0	f	32	high	0	0	0	1
a58hTR4325a	0	0	0	0	0	0	0	0	0	0	0	0	0	0	0	0	0	0	0	0	0	0	0	1	0	0	0	0	0	0	0	0	A	0	0	0	0	0	0	0	0	m	49	high	0	0	0	0
a594TR4338a	0	0	0	0	0	0	0	0	0	0	0	0	0	0	0	0	0	0	0	0	0	0	0	0	0	0	0	0	1	0	0	0	N	0	0	0	1	0	1	1	0	f	48	high	1	0	0	0
a5a4TR4362a	1	0	0	0	0	0	0	0	0	0	0	0	0	0	0	0	0	0	0	0	0	0	0	0	0	0	0	0	0	0	0	0	N	0	0	0	0	0	0	0	0	f	64	medium	1	0	0	1
a5a5TR4363a	1	0	0	0	0	0	0	0	0	0	0	0	0	0	0	0	0	0	0	0	0	0	0	0	0	0	0	0	0	0	0	0	N	0	0	0	0	0	0	0	0	f	67	low	2	0	0	0
a5atTR4382a	0	0	0	0	0	0	0	0	0	0	0	0	0	0	1	0	0	0	0	0	0	0	0	0	0	0	0	0	0	0	0	0	N	0	0	0	1	0	0	0	0	m	69	medium	0	0	0	1
a5awTR4383a	1	0	0	0	0	0	0	0	0	0	0	0	0	0	0	0	0	0	0	0	0	0	0	0	0	0	0	0	0	0	0	0	N	0	0	0	0	0	0	0	0	f	40	low	0	0	0	1
a5ccTR4398a	0	0	0	0	0	0	0	0	0	0	0	0	1	1	0	0	0	0	0	0	0	0	0	0	0	0	0	0	0	0	0	0	A	0	0	0	1	0	0	1	1	m	34	high	0	0	0	1
a5cmTR4404a	0	0	0	0	0	0	0	0	0	0	0	0	1	0	0	0	0	0	0	0	0	0	0	0	0	0	0	0	0	0	1	0	N	0	0	0	0	0	0	0	0	m	14	high	0	0	0	1
a5crTR4408a	0	0	0	0	0	0	1	0	0	0	1	0	0	0	0	1	0	0	0	0	0	0	0	0	0	0	0	0	0	0	0	0	N	0	0	0	0	1	1	0	1	f	66	high	2	0	0	0
a5d8TR2945b	1	0	0	0	0	0	0	0	0	0	0	0	0	0	0	0	0	0	0	0	0	0	0	0	0	0	0	0	0	0	0	0	N	0	0	0	0	1	0	0	0	m	66	medium	0	0	0	1
a5dcTR4434a	0	0	0	0	0	1	0	1	0	0	1	0	0	0	0	1	0	0	0	0	0	0	0	1	1	0	1	0	0	0	1	0	A	0	0	0	1	0	0	1	0	f	63	medium	0	0	0	0
a5djTR4435a	0	0	0	0	0	1	0	0	0	0	0	0	0	0	0	0	0	0	0	1	1	0	0	0	1	0	0	0	1	0	1	0	N	0	0	0	0	1	0	0	0	f	60	high	1	0	0	0
a5dnTR4438a	0	0	0	0	1	1	0	1	0	0	1	0	1	0	0	0	0	0	1	0	0	0	1	1	0	1	0	0	0	0	0	0	N	0	0	0	0	0	0	0	0	m	15	high	1	0	0	1
a5dxTR4442a	1	0	0	0	0	0	0	0	0	0	0	0	0	0	0	0	0	0	0	0	0	0	0	0	0	0	0	0	0	0	0	0	N	0	0	0	0	1	0	0	0	m	14	medium	0	0	0	1
a5e1TR4445a	1	0	0	0	0	0	0	0	0	0	0	0	0	0	0	0	0	0	0	0	0	0	0	0	0	0	0	0	0	0	0	0	N	0	0	0	0	0	0	0	0	f	16	high	1	0	0	0
a5e4TR4449a	0	0	0	0	0	0	0	0	0	0	1	0	0	0	0	1	0	0	0	1	0	0	0	0	0	0	0	0	0	0	0	0	A	0	0	0	0	0	0	0	0	f	69	high	2	0	0	1
a5e6TR4455a	0	0	0	0	0	0	0	0	0	0	0	0	0	0	0	0	1	0	0	1	1	0	1	1	1	1	0	1	1	1	1	0	N	0	0	0	0	0	0	0	0	m	68	high	2	0	0	1
a5e9TR4460a	1	0	0	0	0	0	0	0	0	0	0	0	0	0	0	0	0	0	0	0	0	0	0	0	0	0	0	0	0	0	0	0	N	0	0	0	0	0	0	0	0	f	49	high	0	0	0	0
a5epTR4473a	0	0	0	1	0	1	0	0	0	0	1	0	0	0	0	1	1	0	0	0	0	0	1	0	0	1	0	0	1	0	1	0	N	0	0	0	0	1	0	0	0	f	54	medium	1	0	0	1
a5f2TR4483a	1	0	0	0	0	0	0	0	0	0	0	0	0	0	0	0	0	0	0	0	0	0	0	0	0	0	0	0	0	0	0	0	N	0	0	0	0	0	0	0	0	f	21	medium	0	0	0	1
a5f8TR4493a	0	0	0	0	0	0	0	0	0	0	0	0	0	0	0	0	0	0	0	0	0	0	1	0	0	0	0	0	0	0	0	0	N	0	0	0	0	0	0	0	1	f	64	medium	0	0	0	1
a5faTR4495a	1	0	0	0	0	0	0	0	0	0	0	0	0	0	0	0	0	0	0	0	0	0	0	0	0	0	0	0	0	0	0	0	N	0	0	1	0	0	0	0	1	f	57	high	0	0	0	1
a5fcTR4501a	0	0	0	0	0	0	1	1	0	0	0	1	1	0	0	0	0	0	0	0	0	0	0	0	0	0	0	0	0	0	1	0	N	0	0	0	0	0	0	0	0	m	69	high	0	1	2	1
a5frTR4514a	0	0	0	0	0	0	1	1	0	0	0	0	0	0	0	0	0	0	0	0	1	0	0	0	0	0	0	0	0	0	0	0	N	0	0	0	0	1	0	0	0	f	29	high	1	0	0	0
a5h2TR4520a	0	0	0	1	0	1	1	0	0	0	1	0	1	0	0	0	0	0	0	0	0	0	0	0	1	0	0	1	1	0	1	0	A	0	0	0	0	0	0	0	0	m	54	high	2	0	0	0
a5h6TR4524a	0	0	0	0	0	1	0	0	0	0	0	0	0	0	0	0	0	0	0	0	0	0	0	0	0	0	0	1	0	0	0	0	N	0	0	0	0	1	0	0	0	m	43	high	1	0	0	1
a5jmTR4574a	1	0	0	0	0	0	0	0	0	0	0	0	0	0	0	0	0	0	0	0	0	0	0	0	0	0	0	0	0	0	0	0	N	0	0	0	0	1	0	0	0	m	61	medium	0	0	0	0
a5jnTR4576a	0	0	0	0	1	0	0	1	0	0	1	0	1	0	0	0	0	0	1	1	0	0	0	1	1	0	0	1	1	1	1	0	N	0	0	0	0	0	0	0	0	f	28	medium	0	0	0	1
a5jpTR4577a	1	0	0	0	0	0	0	0	0	0	0	0	0	0	0	0	0	0	0	0	0	0	0	0	0	0	0	0	0	0	0	0	N	0	0	0	0	0	0	0	0	m	27	medium	1	0	0	1
a5jwTR4583a	0	0	0	0	1	1	0	1	0	0	1	0	1	0	0	0	0	0	1	0	0	0	1	1	1	1	1	0	1	0	1	0	A	0	0	0	0	0	0	0	0	f	42	medium	5	1	2	0
a5k7TR4594a	0	0	0	0	0	0	0	0	0	0	0	0	0	0	0	1	0	0	0	0	0	0	0	0	0	0	0	0	0	0	0	0	N	0	0	0	0	0	0	0	0	f	49	high	1	0	0	1
a5k9TR4598a	1	0	0	0	0	0	0	0	0	0	0	0	0	0	0	0	0	0	0	0	0	0	0	0	0	0	0	0	0	0	0	0	N	0	0	0	0	0	0	0	0	f	32	medium	0	0	0	1
a5kjTR4608a	1	0	0	0	0	0	0	0	0	0	0	0	0	0	0	0	0	0	0	0	0	0	0	0	0	0	0	0	0	0	0	0	N	0	0	0	1	0	0	0	1	m	66	high	0	1	2	1
a5kmTR4611a	0	0	0	1	1	1	1	0	0	0	1	0	1	0	0	0	0	1	0	1	1	0	0	0	1	0	0	0	1	0	1	0	N	0	0	0	1	0	0	0	0	m	46	high	1	0	0	1
a5kxTR4617a	1	0	0	0	0	0	0	0	0	0	0	0	0	0	0	0	0	0	0	0	0	0	0	0	0	0	0	0	0	0	0	0	N	0	0	0	0	1	0	1	0	m	68	high	1	0	0	0
a5m0TR4619a	0	0	0	0	0	0	0	0	0	0	0	0	0	0	0	0	0	0	0	0	0	0	0	1	0	0	0	0	1	0	0	0	N	0	0	0	1	0	0	0	0	m	25	high	0	0	0	0
a5m3TR4623a	0	0	0	0	0	0	0	0	0	0	0	0	0	0	0	0	0	0	0	0	0	0	0	0	0	0	0	0	0	0	1	0	N	0	0	0	0	0	0	0	0	f	28	high	0	0	0	1
a5m5TR4628a	1	0	0	0	0	0	0	0	0	0	0	0	0	0	0	0	0	0	0	0	0	0	0	0	0	0	0	0	0	0	0	0	A	0	0	0	0	0	0	0	0	m	61	low	0	0	0	0
a5m7TR4629a	0	0	0	0	0	0	0	0	0	0	0	0	0	0	0	0	0	0	0	0	0	0	1	0	0	0	0	0	0	0	0	0	N	0	0	0	0	0	0	0	0	m	73	high	0	0	0	0
a5m8TR4631a	0	0	0	0	0	0	0	0	0	0	0	0	1	0	0	0	0	0	0	0	0	0	0	0	0	0	0	0	0	0	0	0	N	0	0	0	0	0	0	0	0	f	36	high	0	0	0	1
a5mdTR4636a	0	0	0	0	0	0	0	0	0	0	0	0	0	0	0	0	0	0	1	0	1	0	0	1	0	0	0	0	0	0	1	0	N	0	0	0	0	0	0	0	1	f	38	high	0	0	0	1
a5n2TR4653a	0	0	0	0	1	0	1	0	0	0	1	0	1	0	0	0	0	0	0	0	0	0	1	0	0	1	0	0	0	1	0	0	A	0	0	0	0	0	0	0	1	f	49	high	2	0	0	1
a5n4TR4658a	0	0	0	1	1	0	1	0	0	0	0	0	1	0	0	0	0	0	0	0	0	0	0	0	0	0	0	0	0	0	1	0	N	0	0	0	0	0	0	0	0	f	40	high	1	0	0	1
a5pcTR4709a	0	0	0	0	0	0	0	0	0	0	0	0	0	0	0	0	0	0	0	0	0	0	0	0	0	0	0	0	0	0	1	0	N	0	0	0	1	0	0	0	0	f	47	high	0	0	0	0
a5r7TR4735a	1	0	0	0	0	0	0	0	0	0	0	0	0	0	0	0	0	0	0	0	0	0	0	0	0	0	0	0	0	0	0	0	N	0	0	0	0	1	0	0	1	f	47	high	0	0	0	1
a5rdTR4738a	0	0	0	0	0	0	0	1	0	0	0	0	0	0	0	0	0	0	0	0	0	0	0	0	0	0	0	0	0	0	0	0	N	0	0	0	0	0	0	0	0	f	56	medium	0	0	0	0
a5rfTR4740a	0	0	0	0	0	0	0	0	0	0	0	0	1	1	1	0	0	0	1	1	0	0	0	0	0	0	0	0	0	0	1	0	A	0	0	0	0	0	0	0	0	f	46	high	2	0	0	1
a5rhTR4741a	1	0	0	0	0	0	0	0	0	0	0	0	0	0	0	0	0	0	0	0	0	0	0	0	0	0	0	0	0	0	0	0	N	0	0	0	0	0	0	0	0	f	35	high	0	0	0	0
a5rjTR4744a	1	0	0	0	0	0	0	0	0	0	0	0	0	0	0	0	0	0	0	0	0	0	0	0	0	0	0	0	0	0	0	0	N	0	0	0	0	1	0	0	1	f	33	high	0	0	0	1
a5rwTR4755a	1	0	0	0	0	0	0	0	0	0	0	0	0	0	0	0	0	0	0	0	0	0	0	0	0	0	0	0	0	0	0	0	A	0	0	0	0	0	0	0	0	f	45	medium	0	0	0	0
a5t8TR7747a	1	0	0	0	0	0	0	0	0	0	0	0	0	0	0	0	0	0	0	0	0	0	0	0	0	0	0	0	0	0	0	0	N	0	0	0	0	0	0	0	1	m	53	medium	1	1	0	0
a5t9TR4775a	1	0	0	0	0	0	0	0	0	0	0	0	0	0	0	0	0	0	0	0	0	0	0	0	0	0	0	0	0	0	0	0	N	0	0	0	1	0	0	1	1	m	55	medium	0	0	0	1
a5tfTR4778a	1	0	0	0	0	0	0	0	0	0	0	0	0	0	0	0	0	0	0	0	0	0	0	0	0	0	0	0	0	0	0	0	N	0	0	0	0	0	0	0	0	f	12	medium	0	0	0	1
a5txTR4792a	1	0	0	0	0	0	0	0	0	0	0	0	0	0	0	0	0	0	0	0	0	0	0	0	0	0	0	0	0	0	0	0	A	0	0	0	1	0	1	0	1	f	67	high	1	0	0	0
a5waTR4815a	1	0	0	0	0	0	0	0	0	0	0	0	0	0	0	0	0	0	0	0	0	0	0	0	0	0	0	0	0	0	0	0	A	0	0	0	0	0	0	0	0	f	40	medium	1	1	1	1	1
a5wrTR4832a	1	0	0	0	0	0	0	0	0	0	0	0	0	0	0	0	0	0	0	0	0	0	0	0	0	0	0	0	0	0	0	0	A	0	0	0	0	0	0	0	1	m	71	high	0	0	0	0
a5wwTR4842a	1	0	0	0	0	0	0	0	0	0	0	0	0	0	0	0	0	0	0	0	0	0	0	0	0	0	0	0	0	0	0	0	N	0	0	0	0	0	1	0	1	f	57	high	1	0	0	1
a5xkTR4857a	0	0	0	0	0	0	0	0	0	0	0	0	0	0	0	0	0	0	0	0	0	0	1	0	0	1	0	0	1	1	0	0	N	0	0	0	0	0	0	0	0	f	74	medium	1	0	0	1
a600TR4864a	0	0	0	0	1	0	0	0	0	0	1	0	1	0	0	0	0	0	1	0	0	0	0	0	0	1	0	0	1	0	1	0	N	0	0	0	1	0	0	0	1	f	44	high	0	0	0	1
a60cTR4877a	0	0	0	0	0	0	0	0	0	0	0	0	0	0	0	1	0	0	0	0	0	0	0	0	0	0	0	0	0	0	0	0	N	0	0	0	0	1	1	0	1	f	64	medium	3	0	0	0
a60dTR4879a	0	0	0	0	0	0	0	0	0	0	0	0	0	0	1	0	0	0	0	0	0	0	0	0	0	0	0	0	0	0	0	0	A	0	0	0	0	0	0	0	0	m	64	medium	4	1	2	1
a61tTR4927a	1	0	0	0	0	0	0	0	0	0	0	0	0	0	0	0	0	0	0	0	0	0	0	0	0	0	0	0	0	0	0	0	N	0	0	0	0	1	0	0	0	f	28	high	0	0	0	0
a61xTR4930a	1	0	0	0	0	0	0	0	0	0	0	0	0	0	0	0	0	0	0	0	0	0	0	0	0	0	0	0	0	0	0	0	A	0	0	0	1	0	0	0	1	m	70	high	3	0	0	1
a62hTR4958a	0	0	0	0	0	0	1	0	0	0	0	0	1	0	0	0	0	0	0	0	0	0	0	0	0	0	0	0	1	0	0	0	N	0	0	0	0	0	0	0	0	f	40	high	0	0	0	1
a633TR4975a	1	0	0	0	0	0	0	0	0	0	0	0	0	0	0	0	0	0	0	0	0	0	0	0	0	0	0	0	0	0	0	0	N	0	0	0	0	0	0	0	1	m	10	high	0	0	0	0
a635TR5528b	1	0	0	0	0	0	0	0	0	0	0	0	0	0	0	0	0	0	0	0	0	0	0	0	0	0	0	0	0	0	0	0	N	0	0	0	0	0	0	0	0	f	56	high	0	0	0	0
a639TR4988a	1	0	0	0	0	0	0	0	0	0	0	0	0	0	0	0	0	0	0	0	0	0	0	0	0	0	0	0	0	0	0	0	A	0	1	0	1	0	0	0	0	f	77	high	1	0	0	1
a63tTR5004a	0	0	0	0	0	0	0	0	0	0	0	0	0	0	0	0	0	0	0	0	0	0	0	0	0	0	0	0	0	0	1	0	A	0	0	0	0	0	0	0	1	m	72	high	7	1	0	0
a641TR9508a	0	0	0	0	0	0	0	0	0	0	0	0	0	0	0	0	0	0	0	0	0	0	1	0	0	0	0	0	0	1	0	0	N	0	0	0	0	0	0	0	0	f	61	medium	0	0	0	0
a649TR5025a	1	0	0	0	0	0	0	0	0	0	0	0	0	0	0	0	0	0	0	0	0	0	0	0	0	0	0	0	0	0	0	0	N	0	0	0	0	0	0	0	0	m	56	high	0	0	0	0
a64eTR5028a	0	0	0	0	0	1	0	0	0	0	0	0	0	0	0	0	0	0	0	1	0	0	0	0	0	0	0	0	0	0	1	0	N	1	0	0	0	0	0	0	0	f	35	high	0	0	0	0
a64mTR5044a	0	0	0	0	0	0	0	0	0	0	0	0	1	1	0	0	0	0	0	0	0	0	0	0	0	0	0	0	0	1	0	0	N	0	0	0	0	0	0	0	0	f	58	high	0	0	0	0
a64rTR5039a	1	0	0	0	0	0	0	0	0	0	0	0	0	0	0	0	0	0	0	0	0	0	0	0	0	0	0	0	0	0	0	0	N	0	0	0	0	0	0	0	0	f	61	medium	0	0	0	1
a656TR5053a	1	0	0	0	0	0	0	0	0	0	0	0	0	0	0	0	0	0	0	0	0	0	0	0	0	0	0	0	0	0	0	0	N	0	0	0	0	0	0	0	0	f	53	medium	0	0	0	0
a657TR5062a	1	0	0	0	0	0	0	0	0	0	0	0	0	0	0	0	0	0	0	0	0	0	0	0	0	0	0	0	0	0	0	0	A	1	0	0	0	0	0	0	0	m	52	high	2	0	0	1
a65cTR5057a	0	0	0	0	0	0	0	0	0	0	0	0	0	0	0	0	0	0	0	0	0	0	0	1	0	0	0	0	0	0	0	0	N	0	0	0	0	0	0	0	1	f	64	high	0	0	0	1
a65eTR5060a	1	0	0	0	0	0	0	0	0	0	0	0	0	0	0	0	0	0	0	0	0	0	0	0	0	0	0	0	0	0	0	0	N	0	0	1	1	0	1	0	0	m	49	medium	0	0	0	0
a66hTR5091a	0	0	0	0	0	0	0	0	0	0	0	0	0	0	0	0	0	0	0	0	0	0	0	1	0	0	0	0	0	0	0	0	A	0	0	0	1	1	0	0	0	m	38	medium	0	0	0	1
a672TR5104a	0	0	0	1	1	1	0	1	0	0	1	0	1	1	0	0	0	0	1	0	1	0	1	1	1	1	0	1	1	1	1	0	N	0	0	0	1	0	0	0	0	f	19	medium	1	0	0	0
a67nTR5115a	0	0	0	0	0	0	0	0	0	1	0	0	0	0	0	0	0	0	0	0	0	0	1	0	0	0	1	0	1	1	1	0	N	0	0	0	0	0	0	0	0	f	50	high	0	0	0	1
a68aTR5136a	0	0	0	0	0	0	0	0	0	0	0	0	0	0	1	0	0	0	0	0	0	1	0	0	0	0	1	1	0	0	0	0	N	0	0	0	0	0	0	0	0	f	43	medium	0	0	0	1
a68eTR5142a	1	0	0	0	0	0	0	0	0	0	0	0	0	0	0	0	0	0	0	0	0	0	0	0	0	0	0	0	0	0	0	0	N	0	0	0	0	0	0	0	0	f	46	high	0	0	0	0
a695TR5167a	1	0	0	0	0	0	0	0	0	0	0	0	0	0	0	0	0	0	0	0	0	0	0	0	0	0	0	0	0	0	0	0	N	0	0	0	0	0	0	0	0	m	35	medium	0	0	0	0
a696TR5168a	0	0	0	1	0	0	0	0	0	0	1	0	1	0	0	0	0	0	0	0	0	0	0	0	0	0	0	0	0	0	1	0	N	0	0	0	0	0	0	0	0	m	45	high	0	0	0	0
a69pTR5186a	1	0	0	0	0	0	0	0	0	0	0	0	0	0	0	0	0	0	0	0	0	0	0	0	0	0	0	0	0	0	0	0	N	0	0	0	0	1	0	0	0	m	11	high	0	0	0	1
a69wTR9152a	0	0	0	0	0	0	1	0	0	0	0	0	1	0	0	0	0	0	0	0	0	0	1	1	0	0	0	0	0	0	0	0	N	0	0	0	1	0	1	0	1	f	65	high	2	0	0	1
a6c3TR5230a	0	0	0	0	0	0	0	0	0	0	0	0	0	1	0	0	0	0	0	0	0	0	1	0	0	0	0	0	0	0	0	0	N	0	0	0	0	0	0	0	0	f	60	high	1	0	0	1
a6c7TR5232a	0	0	0	0	0	0	0	0	0	0	0	0	0	0	0	0	0	0	0	0	0	0	0	0	0	0	0	0	0	0	1	0	N	0	0	0	1	0	0	0	0	f	37	high	0	0	0	1
a6caTR5236a	1	0	0	0	0	0	0	0	0	0	0	0	0	0	0	0	0	0	0	0	0	0	0	0	0	0	0	0	0	0	0	0	N	0	0	0	0	0	0	0	0	m	67	high	0	0	0	1
a6ceTR5238a	1	0	0	0	0	0	0	0	0	0	0	0	0	0	0	0	0	0	0	0	0	0	0	0	0	0	0	0	0	0	0	0	N	0	0	0	0	0	0	0	0	f	32	medium	1	0	0	0
a6ckTR5240a	1	0	0	0	0	0	0	0	0	0	0	0	0	0	0	0	0	0	0	0	0	0	0	0	0	0	0	0	0	0	0	0	N	0	0	0	0	0	0	0	0	f	8	low	0	0	0	0
a6dcTR5263a	0	0	0	0	0	0	0	0	0	0	0	0	0	0	0	0	0	0	0	0	0	0	0	0	0	0	0	0	0	0	1	0	N	1	0	0	0	0	0	0	0	m	43	medium	0	0	0	1
a6dhTR5264a	0	0	0	0	0	0	0	0	0	0	0	0	0	0	0	0	0	0	0	0	0	0	0	0	0	0	0	0	0	0	0	0	A	0	0	0	0	0	0	0	0	f	40	high	0	0	0	1
a6e3TR5277a	0	0	0	0	0	0	0	0	0	0	0	0	0	0	0	0	0	0	0	1	0	0	1	0	0	0	0	0	0	0	0	0	A	1	0	0	0	1	0	0	1	f	42	high	1	0	0	0
a6ecTR5285a	0	0	0	0	0	1	1	1	0	0	1	0	0	0	0	0	0	0	0	0	0	0	0	0	1	0	0	1	1	0	0	0	N	0	0	0	0	0	0	0	0	m	43	high	5	0	0	0
a6efTR5283a	0	0	0	0	0	0	0	0	0	0	1	0	0	0	0	0	0	0	0	0	0	0	0	0	0	0	0	0	0	0	0	0	N	0	0	0	0	0	1	0	0	f	74	high	0	0	0	1
a6f0TR5295a	0	0	0	0	0	0	0	0	0	0	0	0	1	0	0	0	1	0	0	0	0	0	1	0	0	0	0	0	1	0	1	0	A	0	0	0	0	0	0	0	0	f	60	medium	3	0	0	0
a6f5TR5306a	0	0	0	0	0	0	0	0	0	0	0	0	0	0	0	0	0	0	0	0	0	0	0	1	0	0	0	0	0	0	0	0	N	0	0	0	0	0	0	0	0	m	45	medium	0	0	0	0
a6fmTR5331a	1	0	0	0	0	0	0	0	0	0	0	0	0	0	0	0	0	0	0	0	0	0	0	0	0	0	0	0	0	0	0	0	N	0	0	0	0	0	0	0	0	m	11	medium	0	0	0	1
a6fwTR5393a	0	0	0	0	0	0	0	0	0	0	1	0	1	0	0	0	0	0	0	0	0	0	1	0	1	0	0	0	0	0	0	0	A	0	0	0	0	0	1	0	0	f	64	medium	2	0	0	0
a6h1TR5348a	0	0	0	0	1	0	0	0	0	0	0	0	0	0	0	0	0	0	0	0	0	0	0	0	0	0	0	0	0	0	0	0	N	0	0	0	0	0	0	0	0	f	12	high	0	0	0	0
a6h7TR5353a	0	0	0	1	0	0	1	1	0	0	1	0	0	1	0	1	0	0	0	0	0	0	0	0	0	0	0	0	0	1	1	0	N	0	0	0	0	0	0	0	0	f	38	high	1	0	0	1
a6j3TR5390a	0	0	0	0	0	1	0	0	0	0	0	0	0	0	0	0	0	0	0	0	0	0	1	0	0	0	0	0	0	0	1	0	N	0	0	0	0	0	1	0	0	m	33	medium	0	0	0	0
a6jaTR5400a	1	0	0	0	0	0	0	0	0	0	0	0	0	0	0	0	0	0	0	0	0	0	0	0	0	0	0	0	0	0	0	0	N	0	0	0	0	0	0	0	0	m	60	high	1	0	0	0
a6jhTR5405a	0	0	0	0	0	0	1	0	0	1	0	0	0	0	1	0	0	0	0	0	0	0	1	0	0	0	0	0	0	0	0	0	N	0	0	0	0	0	0	0	0	f	59	medium	2	0	0	0
a6jjTR5410a	1	0	0	0	0	0	0	0	0	0	0	0	0	0	0	0	0	0	0	0	0	0	0	0	0	0	0	0	0	0	0	0	N	0	0	0	0	1	0	0	0	f	39	medium	0	0	0	1
a6k5TR5434a	0	0	0	0	0	0	0	0	0	0	1	0	0	0	0	0	0	0	0	0	0	0	0	0	0	0	0	0	0	0	0	0	N	0	0	0	0	1	0	0	1	m	66	high	0	0	0	0
a6k7TR5436a	0	0	0	0	0	0	1	0	0	0	1	0	1	0	0	0	0	0	0	0	0	0	0	0	0	0	0	1	0	0	0	0	N	0	0	0	0	0	0	0	0	f	40	high	0	0	0	1
a6k9TR5437a	0	0	0	0	0	0	0	0	0	0	0	0	0	0	0	0	0	0	0	0	0	0	0	1	0	0	0	0	0	0	0	0	N	0	0	0	0	0	0	0	0	f	43	high	0	0	0	0
a6krTR5539a	0	0	0	0	1	0	0	0	0	0	0	0	0	0	0	0	0	0	0	0	0	0	0	0	0	0	0	0	0	0	0	0	N	0	0	0	1	0	0	0	0	m	50	medium	1	0	0	0
a6kxTR5455a	1	0	0	0	0	0	0	0	0	0	0	0	0	0	0	0	0	0	0	0	0	0	0	0	0	0	0	0	0	0	0	0	N	0	0	0	0	0	0	0	0	f	10	high	0	0	0	1
a6m7TR5471a	1	0	0	0	0	0	0	0	0	0	0	0	0	0	0	0	0	0	0	0	0	0	0	0	0	0	0	0	0	0	0	0	N	0	0	0	0	1	0	0	1	f	37	high	1	1	1	1
a6mcTR5476a	0	0	0	0	0	0	0	0	0	0	0	0	1	0	0	0	0	0	0	0	0	0	0	0	0	0	0	0	0	0	0	0	N	0	0	0	1	1	0	0	1	m	20	high	0	0	0	1
a6meTR5480a	0	0	0	0	0	0	0	0	0	0	0	0	0	0	0	0	0	0	0	1	0	0	0	0	1	0	0	0	1	0	0	0	A	0	0	0	1	0	0	0	0	m	56	high	1	0	0	1
a6neTR5502a	1	0	0	0	0	0	0	0	0	0	0	0	0	0	0	0	0	0	0	0	0	0	0	0	0	0	0	0	0	0	0	0	N	0	1	0	0	1	0	0	0	m	66	high	1	0	0	1
a6nnTR5509a	0	0	0	0	0	1	0	0	0	0	0	0	0	0	0	0	0	0	0	0	0	0	0	0	1	0	0	1	0	0	1	0	N	0	0	0	0	1	0	0	0	m	46	medium	0	0	0	1
a6p8TR5530a	1	0	0	0	0	0	0	0	0	0	0	0	0	0	0	0	0	0	0	0	0	0	0	0	0	0	0	0	0	0	0	0	N	0	0	0	0	0	1	0	0	m	37	high	1	0	0	1
a6r1TR5552a	1	0	0	0	0	0	0	0	0	0	0	0	0	0	0	0	0	0	0	0	0	0	0	0	0	0	0	0	0	0	0	0	N	0	0	0	0	0	0	0	0	m	56	medium	1	0	0	1
a6rkTR5572a	1	0	0	0	0	0	0	0	0	0	0	0	0	0	0	0	0	0	0	0	0	0	0	0	0	0	0	0	0	0	0	0	A	0	0	0	0	0	0	0	0	m	54	medium	0	0	0	1
a6rpTR5576a	1	0	0	0	0	0	0	0	0	0	0	0	0	0	0	0	0	0	0	0	0	0	0	0	0	0	0	0	0	0	0	0	N	0	0	0	1	0	0	0	0	m	38	high	0	0	0	0
a6rtTR5581a	0	1	0	0	0	0	0	0	0	0	0	0	1	0	0	0	0	0	0	0	0	0	0	0	0	0	0	0	1	0	0	0	N	0	0	0	0	0	0	0	1	f	39	high	1	0	0	1
a6rxTR5584a	1	0	0	0	0	0	0	0	0	0	0	0	0	0	0	0	0	0	0	0	0	0	0	0	0	0	0	0	0	0	0	0	N	0	0	0	0	0	0	0	0	f	42	medium	0	0	0	0
a6t8TR5592a	1	0	0	0	0	0	0	0	0	0	0	0	0	0	0	0	0	0	0	0	0	0	0	0	0	0	0	0	0	0	0	0	A	0	0	0	0	0	0	0	1	m	65	high	0	1	1	1
a6tdTR5597a	0	0	0	0	0	0	0	0	0	0	0	0	0	0	0	0	0	0	0	0	0	0	0	1	0	0	0	0	0	0	0	0	A	0	0	0	0	0	0	0	1	m	26	high	0	0	0	0
a6tjTR5603a	1	0	0	0	0	0	0	0	0	0	0	0	0	0	0	0	0	0	0	0	0	0	0	0	0	0	0	0	0	0	0	0	N	0	0	0	0	0	0	0	0	m	10	medium	0	0	0	0
a6trTR5615a	1	0	0	0	0	0	0	0	0	0	0	0	0	0	0	0	0	0	0	0	0	0	0	0	0	0	0	0	0	0	0	0	N	0	0	0	0	0	0	0	1	f	49	medium	0	0	0	0
a6w3TR5622a	1	0	0	0	0	0	0	0	0	0	0	0	0	0	0	0	0	0	0	0	0	0	0	0	0	0	0	0	0	0	0	0	A	0	0	0	1	0	0	0	0	m	67	medium	1	0	0	0
a6w4TR5624a	0	0	0	0	0	0	0	0	0	0	1	0	1	0	0	1	0	0	0	0	0	0	0	0	0	0	0	0	1	0	0	0	N	0	0	0	0	0	1	0	0	f	31	high	0	0	0	0
a6w8TR5633a	0	0	0	0	0	0	0	0	0	0	0	0	0	0	0	0	0	0	0	0	0	0	1	0	0	0	0	0	0	0	0	0	N	0	0	0	0	1	0	0	0	m	71	high	2	0	0	0
a6wdTR5637a	1	0	0	0	0	0	0	0	0	0	0	0	0	0	0	0	0	0	0	0	0	0	0	0	0	0	0	0	0	0	0	0	A	0	0	0	0	1	0	0	1	m	62	medium	3	0	0	0
a6whTR5643a	0	0	0	0	0	0	0	0	0	0	0	0	0	0	0	0	0	0	0	0	0	0	0	0	0	0	0	0	0	0	0	0	N	0	0	0	1	0	0	0	0	m	49	medium	0	0	0	1
a6wjTR5644a	0	0	0	0	0	1	0	0	0	0	0	0	0	0	0	0	0	0	0	0	0	0	1	0	1	1	0	1	0	0	1	0	A	0	0	0	0	0	0	0	1	m	42	high	1	0	0	0
a6wmTR5649a	1	0	0	0	0	0	0	0	0	0	0	0	0	0	0	0	0	0	0	0	0	0	0	0	0	0	0	0	0	0	0	0	N	0	0	0	0	0	0	0	0	f	39	medium	0	0	0	0
a6wpTR5652a	1	0	0	0	0	0	0	0	0	0	0	0	0	0	0	0	0	0	0	0	0	0	0	0	0	0	0	0	0	0	0	0	N	0	0	0	0	0	0	0	0	f	59	high	1	0	0	0
a6wxTR5654a	1	0	0	0	0	0	0	0	0	0	0	0	0	0	0	0	0	0	0	0	0	0	0	0	0	0	0	0	0	0	0	0	N	0	0	0	0	0	1	1	1	m	57	high	0	0	0	0
a6x2TR5657a	1	0	0	0	0	0	0	0	0	0	0	0	0	0	0	0	0	0	0	0	0	0	0	0	0	0	0	0	0	0	0	0	N	0	0	0	0	0	0	0	0	f	58	high	0	0	0	0
a6x6TR5663a	0	0	0	0	0	1	0	0	0	0	0	0	0	0	0	0	0	0	0	1	0	0	0	0	0	0	0	0	0	0	1	0	N	0	0	0	1	0	0	0	0	f	41	medium	2	0	0	0
a6xhTR5676a	0	0	0	0	0	0	0	0	0	0	0	0	0	1	0	0	0	0	0	0	0	0	0	0	0	1	0	0	0	0	0	0	N	0	0	0	0	0	0	0	1	f	24	high	0	0	0	1
a6xtTR5687a	1	0	0	0	0	0	0	0	0	0	0	0	0	0	0	0	0	0	0	0	0	0	0	0	0	0	0	0	0	0	0	0	N	0	0	0	0	0	0	0	0	m	49	medium	0	0	0	0
a709TR5699a	0	0	0	0	0	0	0	0	0	0	0	1	0	0	0	0	0	0	0	0	0	0	0	0	0	0	0	0	0	0	0	0	N	0	0	0	1	0	0	0	0	f	66	high	1	0	0	0
a70fTR5709a	0	0	0	0	0	0	1	0	0	0	0	0	0	0	0	0	0	0	0	0	0	0	0	0	0	0	0	0	0	0	0	0	N	0	0	0	0	0	0	0	1	m	31	high	0	0	0	1
a70hTR5712a	1	0	0	0	0	0	0	0	0	0	0	0	0	0	0	0	0	0	0	0	0	0	0	0	0	0	0	0	0	0	0	0	N	0	0	0	0	0	0	0	0	f	61	high	0	0	0	0
a70tTR5722a	0	0	0	1	1	1	0	1	0	0	0	0	1	0	0	0	1	0	0	0	0	0	0	0	1	0	0	0	0	0	1	0	N	0	0	0	1	0	0	0	0	f	32	high	1	1	0	0
a715TR5733a	0	0	0	1	0	0	0	0	0	0	0	0	0	1	1	0	0	0	0	0	0	0	0	1	0	0	0	0	0	0	0	0	N	0	0	0	0	1	0	0	1	m	47	high	1	0	0	0
a722TR5768a	0	0	0	0	0	0	0	0	0	0	0	0	0	0	0	0	0	0	0	1	0	0	1	0	0	0	0	0	1	0	1	0	N	0	0	0	1	0	0	0	0	f	49	high	0	0	0	0
a72aTR5775a	0	0	0	0	0	0	0	0	0	0	0	0	1	0	0	0	0	0	0	1	0	0	0	0	0	0	0	0	1	0	1	0	N	0	0	0	0	0	0	0	0	f	41	high	1	0	0	1
a72jTR5782a	1	0	0	0	0	0	0	0	0	0	0	0	0	0	0	0	0	0	0	0	0	0	0	0	0	0	0	0	0	0	0	0	A	0	0	0	0	0	0	0	0	m	67	high	0	0	0	0
a72nTR5788a	1	0	0	0	0	0	0	0	0	0	0	0	0	0	0	0	0	0	0	0	0	0	0	0	0	0	0	0	0	0	0	0	N	0	0	0	0	0	0	1	0	m	50	medium	0	0	0	1
a730TR5792a	1	0	0	0	0	0	0	0	0	0	0	0	0	0	0	0	0	0	0	0	0	0	0	0	0	0	0	0	0	0	0	0	N	0	0	0	1	0	0	0	0	f	36	high	1	0	0	0
a733TR5797a	0	0	0	0	0	0	0	0	0	0	0	0	0	0	0	0	0	0	0	0	0	0	0	1	0	0	1	0	1	0	1	0	N	0	0	0	1	0	0	0	0	m	38	high	0	0	0	1
a735TR5803a	0	0	0	0	0	0	0	1	0	0	1	0	0	0	0	1	0	0	1	0	0	1	0	0	0	0	0	0	0	0	1	0	N	0	0	0	0	1	0	0	0	m	50	high	0	0	0	1
a739TR5805a	0	0	0	0	1	1	0	0	1	0	1	0	1	1	1	0	0	0	1	0	1	0	1	0	0	1	0	0	0	0	1	0	A	0	0	0	0	0	0	1	1	f	33	medium	4	0	0	0
a73hTR5812a	1	0	0	0	0	0	0	0	0	0	0	0	0	0	0	0	0	0	0	0	0	0	0	0	0	0	0	0	0	0	0	0	N	0	0	0	0	0	0	0	0	m	62	high	0	0	0	0
a743TR5826a	1	0	0	0	0	0	0	0	0	0	0	0	0	0	0	0	0	0	0	0	0	0	0	0	0	0	0	0	0	0	0	0	N	0	0	0	0	1	0	0	0	m	12	medium	0	0	0	0
a748TR5831a	1	0	0	0	0	0	0	0	0	0	0	0	0	0	0	0	0	0	0	0	0	0	0	0	0	0	0	0	0	0	0	0	A	0	0	0	0	0	0	0	0	m	31	high	0	0	0	0
a74aTR5832a	0	0	0	1	0	0	1	1	0	0	0	0	0	0	0	0	0	0	1	1	0	0	0	0	0	0	0	0	0	1	1	0	N	0	0	0	0	0	0	0	1	f	61	high	0	0	0	1
a74jTR5846a	1	0	0	0	0	0	0	0	0	0	0	0	0	0	0	0	0	0	0	0	0	0	0	0	0	0	0	0	0	0	0	0	A	0	0	0	0	0	1	0	1	m	27	medium	0	1	1	1
a74nTR5849a	0	0	0	0	0	0	0	0	0	0	0	0	0	0	1	0	0	0	0	0	0	0	0	0	0	0	0	0	0	0	0	0	A	0	0	0	0	1	0	0	0	f	67	high	3	0	0	0
a74rTR5851a	0	0	0	1	0	0	0	0	0	0	0	0	0	0	0	0	0	0	0	0	0	0	0	0	1	0	0	1	0	0	1	0	A	0	0	0	1	0	0	0	0	m	37	high	0	0	0	0
a75nTR5882a	0	0	0	0	0	0	0	0	0	0	0	0	0	0	0	0	0	0	0	0	0	0	0	0	0	0	0	0	0	0	1	0	N	0	0	0	1	0	0	0	0	f	66	medium	2	0	0	1
a76nTR5908a	1	0	0	0	0	0	0	0	0	0	0	0	0	0	0	0	0	0	0	0	0	0	0	0	0	0	0	0	0	0	0	0	N	0	0	0	0	0	0	0	0	m	61	medium	1	0	0	0
a76rTR5916a	1	0	0	0	0	0	0	0	0	0	0	0	0	0	0	0	0	0	0	0	0	0	0	0	0	0	0	0	0	0	0	0	A	0	0	0	0	0	1	0	1	m	38	high	0	0	0	1
a772TR5924a	0	0	0	0	0	0	0	1	0	0	0	0	0	0	0	0	0	1	0	0	0	0	1	0	1	0	1	0	0	0	1	1	A	1	0	0	1	0	0	0	0	m	63	high	0	0	0	0
a774TR5925a	0	0	0	0	0	0	0	0	0	0	1	0	1	0	0	0	0	0	0	0	0	0	0	1	0	0	0	0	0	0	0	0	A	1	0	0	1	0	0	0	0	m	70	high	1	0	0	1
a77pTR5938a	0	0	0	0	0	0	0	0	0	0	1	0	1	0	0	1	0	0	1	0	0	0	1	1	0	1	0	0	1	0	1	0	N	0	0	0	0	1	0	0	1	f	42	medium	0	0	0	1
a78aTR5959a	1	0	0	0	0	0	0	0	0	0	0	0	0	0	0	0	0	0	0	0	0	0	0	0	0	0	0	0	0	0	0	0	N	0	0	0	0	0	0	0	0	m	31	high	0	0	0	0
a78cTR5960a	0	0	0	1	0	0	0	0	0	0	0	0	0	0	1	0	0	0	0	0	0	0	0	0	1	0	0	0	0	0	1	0	N	0	0	0	0	0	0	0	0	m	48	high	0	0	0	1
a78kTR5972a	1	0	0	0	0	0	0	0	0	0	0	0	0	0	0	0	0	0	0	0	0	0	0	0	0	0	0	0	0	0	0	0	N	0	0	0	0	1	0	0	0	f	69	medium	0	0	0	0
a78pTR5977a	0	0	0	1	0	0	0	0	0	0	0	0	0	0	0	0	0	0	0	0	0	0	0	0	0	0	0	0	0	0	0	0	N	0	0	0	0	1	0	0	1	f	49	medium	2	0	0	1
a790TR5985a	0	0	0	0	0	0	0	0	0	0	0	0	0	0	0	0	0	0	0	0	0	0	0	0	0	0	0	0	0	0	0	0	N	0	0	0	1	0	0	0	0	f	63	medium	1	0	0	0
a792TR5990a	1	0	0	0	0	0	0	0	0	0	0	0	0	0	0	0	0	0	0	0	0	0	0	0	0	0	0	0	0	0	0	0	N	0	0	0	1	0	0	0	0	m	10	medium	1	0	0	0
a79aTR5996a	0	0	0	1	0	0	0	0	0	0	0	1	0	0	0	0	1	0	0	0	0	0	0	0	0	0	0	0	0	0	1	0	N	1	0	0	1	0	0	0	0	f	60	high	1	0	0	0
a7c1TR6047a	1	0	0	0	0	0	0	0	0	0	0	0	0	0	0	0	0	0	0	0	0	0	0	0	0	0	0	0	0	0	0	0	N	0	0	0	0	0	0	0	0	m	10	low	0	0	0	0
a7c5TR6051a	0	0	0	0	0	0	0	0	0	0	0	0	1	0	0	0	0	0	0	0	0	0	0	0	1	0	0	1	0	0	0	0	A	1	0	0	0	0	0	0	0	f	12	high	1	0	0	1
a7caTR6057a	1	0	0	0	0	0	0	0	0	0	0	0	0	0	0	0	0	0	0	0	0	0	0	0	0	0	0	0	0	0	0	0	N	0	0	0	1	0	0	0	0	m	63	high	1	0	0	0
a7cmTR6064a	0	0	0	0	1	0	0	0	0	0	0	0	0	0	0	0	0	0	0	0	0	0	0	0	0	0	0	0	0	0	0	0	N	0	0	0	0	0	0	0	0	m	10	low	0	0	0	0
a7d9TR6092a	1	0	0	0	0	0	0	0	0	0	0	0	0	0	0	0	0	0	0	0	0	0	0	0	0	0	0	0	0	0	0	0	N	0	0	0	0	0	0	0	0	f	66	medium	1	0	0	0
a7dkTR6099a	0	0	0	0	0	0	0	0	0	0	0	0	0	1	1	1	0	0	0	1	0	0	0	0	0	0	0	0	0	0	0	0	N	0	0	0	0	0	0	0	0	m	12	medium	0	0	0	0
a7e8TR6118a	0	0	0	0	0	0	0	0	0	0	1	0	1	0	0	0	0	0	0	0	0	0	0	0	0	0	0	0	0	0	0	0	N	0	0	0	1	0	0	0	0	m	33	high	0	0	0	1
a7ecTR6134a	0	0	0	0	0	0	0	0	0	0	0	0	0	0	0	0	0	0	0	0	0	0	0	0	0	0	0	0	0	0	1	0	N	0	0	0	1	0	0	0	0	f	31	high	0	0	0	1
a7efTR6136a	0	0	0	0	0	0	0	0	0	0	0	0	0	0	0	0	0	0	0	0	0	0	0	1	0	0	0	0	0	0	0	0	N	0	0	0	0	0	1	0	0	m	56	medium	0	0	0	0
a7ehTR6137a	1	0	0	0	0	0	0	0	0	0	0	0	0	0	0	0	0	0	0	0	0	0	0	0	0	0	0	0	0	0	0	0	N	0	0	0	0	0	1	0	0	m	38	medium	0	0	0	1
a7epTR6144a	1	0	0	0	0	0	0	0	0	0	0	0	0	0	0	0	0	0	0	0	0	0	0	0	0	0	0	0	0	0	0	0	A	0	0	0	1	0	0	0	0	m	31	high	0	0	0	0
a7erTR6148a	0	0	0	0	0	0	0	0	0	0	0	0	0	0	0	0	0	0	0	0	0	0	0	0	0	0	0	0	0	0	0	0	A	0	0	0	1	0	0	0	0	f	44	medium	0	0	0	1
a7f2TR6152a	0	0	0	0	0	0	0	0	0	0	1	0	0	0	0	1	0	0	0	0	0	0	0	0	0	0	0	0	0	0	0	0	A	0	0	0	0	0	0	0	0	m	54	medium	0	0	0	1
a7fhTR6166a	1	0	0	0	0	0	0	0	0	0	0	0	0	0	0	0	0	0	0	0	0	0	0	0	0	0	0	0	0	0	0	0	A	0	0	0	0	0	0	0	1	f	42	high	1	0	0	1
a7h6TR6184a	1	0	0	0	0	0	0	0	0	0	0	0	0	0	0	0	0	0	0	0	0	0	0	0	0	0	0	0	0	0	0	0	A	0	0	0	0	0	0	0	0	f	69	medium	0	0	0	0
a7h9TR6190a	0	0	0	0	0	0	0	0	0	0	0	0	0	0	1	0	0	0	0	0	0	0	1	0	0	0	0	0	0	0	0	0	A	0	0	0	0	0	0	0	0	m	56	low	0	0	0	0
a7hhTR6197a	1	0	0	0	0	0	0	0	0	0	0	0	0	0	0	0	0	0	0	0	0	0	0	0	0	0	0	0	0	0	0	0	N	0	0	0	0	0	0	0	0	m	51	high	0	0	0	0
a7j0TR6210a	0	0	0	0	0	0	0	0	0	0	0	0	0	1	1	0	0	0	0	0	0	0	0	1	0	0	0	0	0	0	0	0	A	1	0	0	1	0	0	0	1	m	51	high	0	0	0	1
a7j1TR6211a	0	0	0	0	0	0	0	0	0	1	0	0	0	1	1	0	1	0	0	0	1	0	1	1	1	0	0	1	1	1	1	1	A	0	0	0	1	0	0	0	1	m	49	low	5	0	0	0
a7j2TR6212a	1	0	0	0	0	0	0	0	0	0	0	0	0	0	0	0	0	0	0	0	0	0	0	0	0	0	0	0	0	0	0	0	N	0	0	0	0	1	0	0	0	f	66	high	1	0	0	1
a7j6TR6214a	1	0	0	0	0	0	0	0	0	0	0	0	0	0	0	0	0	0	0	0	0	0	0	0	0	0	0	0	0	0	0	0	A	0	0	0	0	0	0	0	0	m	64	high	0	0	0	0
a7j8TR6216a	0	0	0	0	0	0	0	0	0	0	0	0	0	0	0	0	1	0	0	0	0	0	1	0	0	1	1	0	0	0	0	0	N	0	0	0	0	1	0	0	0	m	67	high	1	0	0	1
a7jjTR6227a	1	0	0	0	0	0	0	0	0	0	0	0	0	0	0	0	0	0	0	0	0	0	0	0	0	0	0	0	0	0	0	0	N	0	0	0	0	0	0	0	0	m	15	medium	0	0	0	0
a7k3TR6243a	0	0	0	0	1	0	0	1	0	1	0	0	1	0	0	0	0	0	1	0	0	0	1	1	0	1	0	0	1	0	1	0	N	0	0	0	1	0	0	0	0	f	69	high	4	0	0	0
a7k4TR6247a	1	0	0	0	0	0	0	0	0	0	0	0	0	0	0	0	0	0	0	0	0	0	0	0	0	0	0	0	0	0	0	0	N	0	0	0	0	0	0	0	0	m	41	high	0	0	0	1
a7knTR6258a	1	0	0	0	0	0	0	0	0	0	0	0	0	0	0	0	0	0	0	0	0	0	0	0	0	0	0	0	0	0	0	0	A	0	0	0	0	0	0	0	0	f	59	medium	1	0	0	1
a7ktTR6262a	1	0	0	0	0	0	0	0	0	0	0	0	0	0	0	0	0	0	0	0	0	0	0	0	0	0	0	0	0	0	0	0	N	0	0	0	0	0	0	0	0	f	69	medium	1	0	0	0
a7m4TR6285a	1	0	0	0	0	0	0	0	0	0	0	0	0	0	0	0	0	0	0	0	0	0	0	0	0	0	0	0	0	0	0	0	A	0	0	0	0	0	0	0	0	f	39	high	0	0	0	1
a7m8TR6290a	0	0	0	1	1	0	0	1	0	0	1	0	1	0	0	0	0	0	1	0	0	0	0	0	0	0	0	0	0	0	1	0	N	0	0	0	0	0	0	0	0	m	37	high	1	0	0	0
a7maTR6293a	1	0	0	0	0	0	0	0	0	0	0	0	0	0	0	0	0	0	0	0	0	0	0	0	0	0	0	0	0	0	0	0	N	0	0	0	0	0	0	0	0	m	63	high	0	0	0	1
a7mcTR6301a	0	0	0	0	0	0	0	0	0	0	1	0	0	1	1	0	0	0	0	1	0	0	1	1	1	0	0	0	0	0	1	0	A	0	0	0	0	0	0	0	0	m	52	high	3	0	0	0
a7mpTR6300a	0	0	0	0	0	0	0	0	0	0	0	0	0	0	0	0	0	0	0	1	1	0	1	1	0	0	0	0	1	1	0	0	A	0	0	0	1	0	0	0	0	f	47	medium	2	1	0	1
a7mtTR6305a	1	0	0	0	0	0	0	0	0	0	0	0	0	0	0	0	0	0	0	0	0	0	0	0	0	0	0	0	0	0	0	0	N	0	0	0	0	1	0	0	0	m	61	high	0	0	0	0
a7mwTR6307a	1	0	0	0	0	0	0	0	0	0	0	0	0	0	0	0	0	0	0	0	0	0	0	0	0	0	0	0	0	0	0	0	A	0	0	0	0	0	0	0	0	m	70	high	1	0	0	0
a7p0TR6336a	1	0	0	0	0	0	0	0	0	0	0	0	0	0	0	0	0	0	0	0	0	0	0	0	0	0	0	0	0	0	0	0	A	0	0	0	1	0	0	1	1	f	48	medium	1	0	0	0
a7pdTR6357a	1	0	0	0	0	0	0	0	0	0	0	0	0	0	0	0	0	0	0	0	0	0	0	0	0	0	0	0	0	0	0	0	N	1	0	0	0	0	0	0	0	f	69	medium	1	0	0	1
a7rdTR6389a	0	0	0	0	1	1	0	0	0	0	0	0	0	0	0	0	0	0	0	0	0	0	0	1	0	0	0	0	0	0	0	0	N	0	0	0	1	1	0	0	0	m	54	medium	2	0	0	0
a7reTR6384a	0	0	0	0	0	0	0	0	0	0	0	0	0	0	0	0	0	0	0	0	0	0	0	1	0	0	0	0	0	0	0	0	A	0	0	0	1	0	1	1	1	m	37	high	0	0	0	1
a7rpTR6395a	0	0	0	0	0	0	1	0	0	0	1	0	0	0	0	0	0	0	0	0	0	0	0	0	0	0	0	0	0	0	0	0	A	0	0	0	0	0	0	0	0	m	41	high	0	0	0	0
a7rwTR6399a	1	0	0	0	0	0	0	0	0	0	0	0	0	0	0	0	0	0	0	0	0	0	0	0	0	0	0	0	0	0	0	0	A	0	0	0	0	0	0	0	1	m	57	medium	0	0	0	1
a7t6TR6410a	0	0	0	0	1	1	0	1	0	0	1	0	1	0	0	0	0	0	0	0	0	0	1	0	0	1	0	0	1	0	1	0	A	0	0	0	0	0	0	0	1	m	14	medium	1	0	0	1
a7tpTR6424a	0	0	0	0	0	0	0	0	0	0	0	0	1	0	0	0	0	0	0	0	0	0	0	0	0	0	0	0	0	0	1	0	N	0	0	0	0	0	0	0	0	m	63	medium	0	0	0	1
a7w6TR6437a	0	0	0	0	0	0	0	0	0	0	0	0	1	0	0	0	0	0	0	0	0	0	0	0	0	0	0	0	1	0	1	0	N	0	0	0	1	0	0	0	0	f	28	high	0	1	0	1
a7w7TR6439a	1	0	0	0	0	0	0	0	0	0	0	0	0	0	0	0	0	0	0	0	0	0	0	0	0	0	0	0	0	0	0	0	N	0	0	0	0	0	0	0	0	f	34	medium	0	0	0	0
a7wrTR6455a	1	0	0	0	0	0	0	0	0	0	0	0	0	0	0	0	0	0	0	0	0	0	0	0	0	0	0	0	0	0	0	0	N	0	0	0	0	1	0	1	1	m	10	high	0	1	1	1
[truncated: 2,210 more rows]

## Sheet: Multivariate_analysis p>0,01
(Intercept)	age	complaint	frailty	path_anaplasma	path_b_miyamotoi	path_bsl	path_neoehrlichia	path_r_helvetica	sexm	stageN
[truncated: 17 more rows]

[truncated: 6 more sheets: Table 1, Multivariate_analysis p>0,05, VIF, AB use, LB_GP_confirmed, LB_GP_Confirmed_GLM]
